# Supplementary material
Source: PubMed Central journal article supplement (PMC6247111)

# Intermolecular Anti-Markovnikov Hydroamination of Unactivated Alkenes with Sulfonamides Enabled by Proton-Coupled Electron Transfer

Qilei Zhu, David E. Graff and Robert R. Knowles\*

Department of Chemistry, Princeton University, Princeton, New Jersey 08544, United States

## Supporting Information

| <b>Table of Contents</b>                                                    | <b>Page</b> |
|-----------------------------------------------------------------------------|-------------|
| Materials and methods                                                       | S1          |
| Synthesis and characterization of substrates                                | S3          |
| Synthesis and characterization of photocatalyst                             | S21         |
| Synthesis and characterization of phosphate and TRIP thiol                  | S24         |
| Characterization of products                                                | S26         |
| Mechanistic studies                                                         |             |
| Stern-Volmer experiments                                                    | S54         |
| Cyclic voltammetry details and results                                      | S57         |
| DFT calculation details and results                                         | S60         |
| <sup>1</sup> H, <sup>13</sup> C and <sup>31</sup> P NMR spectra of products | S76         |

# I. Materials and Methods

## General Information

Commercial reagents were purified prior to use following the guidelines of Perrin and Armarego<sup>1</sup>. All solvents were purified according to the method of Grubbs<sup>2</sup>. Nitromethane was bought from Sigma-Aldrich, and dried by 4A molecular sieve in a flame-dried Schlenk flask. Organic solutions were concentrated under reduced pressure on a Büchi rotary evaporator. Chromatographic purification of products was accomplished by flash chromatography on Silicycle F60 silica gel according to the method of Still<sup>3</sup>. Thin-layer chromatography (TLC) was performed on Silicycle 250  $\mu\text{m}$  silica gel plates. Visualization of the developed chromatogram was performed by fluorescence quenching, Seebach's stain and potassium permanganate stain.

<sup>1</sup>H, <sup>13</sup>C and <sup>19</sup>F NMR spectra were recorded on a Bruker 500 (500, 125 and 470 MHz) instrument, and chemical shifts are calibrated by internal standard tetramethylsilane (TMS). Data for <sup>1</sup>H NMR are reported as follows: chemical shift ( $\delta$  ppm), integration, multiplicity (s = singlet, d = doublet, t = triplet, q = quartet, m = multiplet), coupling constant (Hz) and assignment. Data for <sup>13</sup>C NMR are reported in terms of chemical shift and no special nomenclature is used for equivalent carbons. IR spectra were recorded on a Perkin Elmer Paragon 1000 spectrometer and are reported in terms of frequency of absorption ( $\text{cm}^{-1}$ ). High-resolution mass spectra were obtained at Princeton University mass spectrometry facilities using an Agilent 6210 TOF LC/MS. Gas chromatography mass spectrometry (GC-MS) was performed on an Agilent 6890 GC-5975C MSD.

## General procedures for hydrosulfonamidation reactions

### Method A (reaction optimization):

An oven-dried 2-dram vial was charged with a magnetic stir bar, substrate (0.05 mmol, 1.0 equiv) and  $[\text{Ir}(\text{dF-CF}_3\text{-ppy})_2(\text{d}(\text{CF}_3)\text{-bpy})]\text{PF}_6$  (0.001 mmol, 2 mol%, 1.2 mg). The vial was brought into a glove box where tetrabutylammonium dibutyl phosphate (0.01 mmol, 20 mol%, 4.5 mg) was added. The vial was then sealed with a Teflon septa and removed from the glovebox. The vial was then evacuated and backfilled with Ar three times. 1 mL of anhydrous solvent was added, followed by 2,4,6-triisopropylbenzene thiol (0.015 mmol, 30 mol%, 3.6 mg). The reaction was stirred at room temperature and irradiated with one Kessil lamp for 18 h. The reaction was filtered through a pipette containing 0.75 inch of silica gel, and rinsed with ethyl acetate. The yields were determined on GC with 5  $\mu\text{L}$  diphenyl ether as an internal standard.

### Method B (preparative scale for intramolecular hydrosulfonamidation):

An oven-dried 2-dram vial was charged with a magnetic stir bar, substrate (0.5 mmol, 1.0 equiv) and  $[\text{Ir}(\text{dF-CF}_3\text{-ppy})_2(\text{d}(\text{CF}_3)\text{-bpy})]\text{PF}_6$  (0.001 mmol, 2 mol%, 11.5 mg). The vial was brought into a glove box where tetrabutylammonium dibutyl phosphate (0.1 mmol, 20 mol%, 45.2 mg) was added. The vial was then sealed with a Teflon septa and removed from the glovebox. The vial was then evacuated and backfilled with Ar three times. 5.0 mL (0.1 mmol/mL) anhydrous trifluorotoluene was added, followed by 2,4,6-

triisopropylbenzene thiol (0.15 mmol, 30 mol%, 35.5 mg). The reaction was stirred at room temperature and irradiated with blue LED Kessil lamps for 36 h. Solvent was removed under vacuum, and the crude product was purified by silica gel (25 gram) flash column chromatography (eluted with hexane/ethylacetate) to afford the named products.

Method C (preparative scale for intermolecular hydrosulfonamidation):

An oven-dried 2-dram vial was charged with a magnetic stir bar, sulfonamides (0.5 mmol, 1.0 equiv) and  $[\text{Ir}(\text{dF-CF}_3\text{-ppy})_2(\text{d}(\text{CF}_3)\text{-bpy})]\text{PF}_6$  (0.001 mmol, 2 mol%, 11.5 mg). The vial was brought into a glove box where tetrabutylammonium dibutyl phosphate (0.1 mmol, 20 mol%, 45.2 mg) was added. The vial was then sealed with a Teflon septa and removed from the glovebox. The vial was then evacuated and backfilled with Ar three times. 5.0 mL (0.1 mmol/mL) degassed anhydrous trifluorotoluene was added, followed by 2,4,6-triisopropylbenzene thiol (0.15 mmol, 30 mol%, 35.5 mg) and the corresponding alkene acceptor (1.5 mmol, 3.0 eq). The reaction was stirred at room temperature and irradiated with blue LED Kessil lamps for 36 h (or otherwise indicated). Solvent was removed under vacuum, and the crude product was purified by silica gel (25 gram) flash column chromatography (eluted with hexane/ethylacetate) to afford the named products.

## II. Synthesis and Characterization of Substrates

### General procedure for synthesis of sulfonamides

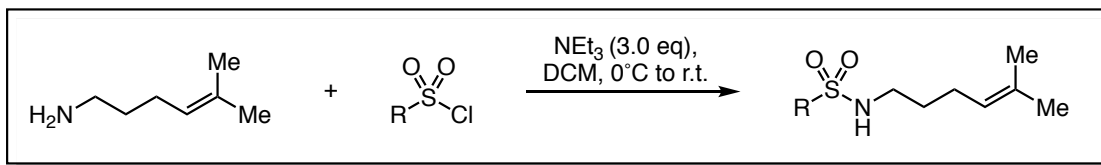

To a flame-dried round bottom flask was charged with magnetic stir bar, 5-methylhex-4-en-1-amine<sup>4</sup> (crude from LAH reduction, 10.0 mmol), dichloromethane (40 mL, 0.25 M) and triethylamine (4.18 mL, 30.0 mmol, 3.0 eq). The flask was cooled to 0°C. Corresponding sulfonyl chloride (1.1 eq, 11.0 mmol) was added dropwise or in small portions. After addition, reaction was warmed up to room temperature gradually and stirred at room temperature for two hours. Reaction was quenched by adding 100mL brine, and extract by 3×30 mL dichloromethane. Combined organic phase was washed by brine three times. Collect the organic phase and dried over Na<sub>2</sub>SO<sub>4</sub>. Crude product was purified by silica gel flash chromatography to obtain the sulfonamide products.

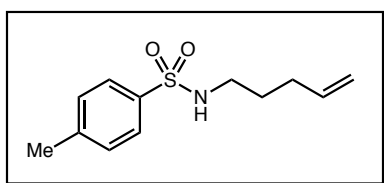

#### 4-methyl-N-(pent-4-en-1-yl)benzenesulfonamide

The title sulfonamide was synthesized following the general procedure found above. Pent-4-en-1-amine was synthesized corresponding to a reported method<sup>5</sup> and was used in this reaction without further purification.

The title sulfonamide was purified by silica gel chromatography (gradient from 0% to 15% EtOAc/hexane) to afford a colorless liquid.

**IR** (Neat): 3282, 2934, 1426, 1324, 1158, 1094, 815, 664cm<sup>-1</sup>;

**<sup>1</sup>H NMR** (500 MHz, CDCl<sub>3</sub>) δ 7.78-7.74 (m, 2H), 7.33-7.29 (m, 2H), 5.74-5.66 (m, 1H), 4.99-4.93 (m, 2H), 4.78 (br, 1H), 2.94 (q, *J* = 7.0 Hz, 2H), 2.43 (s, 3H), 2.06-2.01 (m, 2H), 1.59-1.53 (m, 2H);

**<sup>13</sup>C NMR** (126 MHz, CDCl<sub>3</sub>) δ = 143.37, 137.25, 136.93, 129.71, 127.09, 115.55, 42.63, 30.66, 28.67, 21.54;

**HRMS** (ESI) exact mass calculated for [M] (C<sub>12</sub>H<sub>17</sub>NO<sub>2</sub>S) from [M+H]<sup>+</sup> requires *m/z* 239.09800, found *m/z* 239.09782, difference 0.73 ppm.

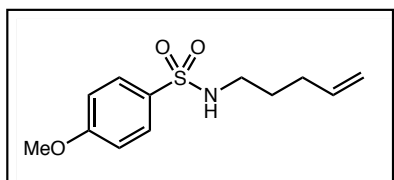

#### 4-methoxy-N-(pent-4-en-1-yl)benzenesulfonamide

The title sulfonamide was synthesized following the general procedure found above and was purified by silica gel chromatography (gradient from 0% to 20% EtOAc/hexane) to afford a colorless liquid.

**IR** (Neat): 3281, 2939, 1597, 1498, 1323, 1302, 1259, 1152, 1095, 833cm<sup>-1</sup>;



**<sup>1</sup>H NMR** (500 MHz, CDCl<sub>3</sub>) δ 7.82-7.78 (m, 2H), 7.00-6.96 (m, 2H), 5.74-5.66 (m, 1H), 4.99-4.93 (m, 2H), 4.70 (br, 1H), 3.87 (s, 3H), 2.93 (q, *J* = 7.0 Hz, 2H), 2.07-2.02 (m, 2H), 1.59-1.53 (m, 2H);

**<sup>13</sup>C NMR** (126 MHz, CDCl<sub>3</sub>) δ = 162.83, 137.26, 131.51, 129.20, 115.56, 114.23, 55.63, 42.60, 30.68, 28.65;

**HRMS** (ESI) exact mass calculated for [M] (C<sub>12</sub>H<sub>17</sub>NO<sub>3</sub>S) from [M+H]<sup>+</sup> requires *m/z* 255.09291, found *m/z* 255.09297, difference 0.21 ppm.

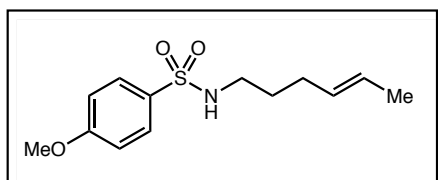

(E)-N-(hex-4-en-1-yl)-4-methoxybenzenesulfonamide

The title sulfonamide was synthesized following the general procedure found above. (E)-hex-4-en-1-amine was synthesized corresponding to a reported method<sup>6</sup> and used without further purification. The title sulfonamide was purified by silica gel chromatography (gradient from 0% to 20% EtOAc/hexane) to afford a colorless liquid.

**IR** (Neat): 3281, 2936, 1597, 1498, 1259, 1153, 1096, 834cm<sup>-1</sup>;

**<sup>1</sup>H NMR** (500 MHz, CDCl<sub>3</sub>) δ 7.82-7.78 (m, 2H), 7.00-6.96 (m, 2H), 5.41-5.26 (m, 2H), 4.52 (br, 1H), 3.87 (s, 3H), 2.92 (q, *J* = 7.0 Hz, 2H), 1.98-1.93 (m, 2H), 1.60 (d, *J* = 6.5 Hz, 3H), 1.54-1.48 (m, 2H);

**<sup>13</sup>C NMR** (126 MHz, CDCl<sub>3</sub>) δ = 162.82, 131.55, 129.67, 129.22, 126.16, 114.21, 55.62, 42.62, 29.51, 29.22, 17.88;

**HRMS** (ESI) exact mass calculated for [M] (C<sub>13</sub>H<sub>19</sub>NO<sub>3</sub>S) from [M+H]<sup>+</sup> requires *m/z* 269.10856, found *m/z* 269.10908, difference 1.93 ppm.

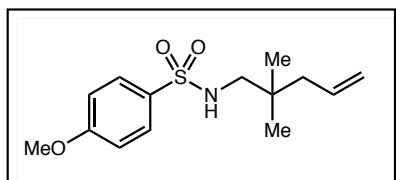

N-(2,2-dimethylpent-4-en-1-yl)-4-methoxybenzenesulfonamide

The title sulfonamide was synthesized following the general procedure found above. 2,2-dimethylpent-4-en-1-amine was synthesized corresponding to a reported method<sup>7</sup> and was used without further purification. The title sulfonamide was purified by silica gel chromatography (gradient from 0% to 20% EtOAc/hexane) to afford a colorless liquid.

**IR** (Neat): 3280, 2961, 1597, 1498, 1259, 1152, 1096, 834cm<sup>-1</sup>;

**<sup>1</sup>H NMR** (500 MHz, CDCl<sub>3</sub>) δ 7.81-7.77 (m, 2H), 7.00-6.96 (m, 2H), 5.71-5.65 (m, 1H), 4.93-4.86 (m, 2H), 4.46 (br, 1H), 3.88 (s, 3H), 2.91-2.86 (m, 2H), 1.49-1.46 (m, 2H), 0.94 (s, 6H);

**<sup>13</sup>C NMR** (126 MHz, CDCl<sub>3</sub>) δ = 162.82, 147.12, 131.52, 129.20, 114.21, 111.53, 55.62, 41.86, 39.86, 35.86, 26.74;

**HRMS** (ESI) exact mass calculated for [M] (C<sub>14</sub>H<sub>21</sub>NO<sub>3</sub>S) from [M+H]<sup>+</sup> requires *m/z* 283.12421, found *m/z* 283.12407, difference 0.5 ppm.

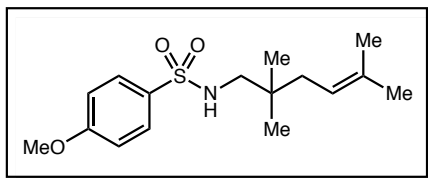

4-methoxy-N-(2,2,5-trimethylhex-4-en-1-yl)benzenesulfonamide

The title sulfonamide was synthesized following the general procedure found above. 2,2,5-trimethylhex-4-en-1-amine was synthesized corresponding to an alteration of a reported method,<sup>7</sup> using 1-bromo-3-methylbut-2-ene instead of allylbromide, and carried on for use without in this reaction without purification. The title sulfonamide was purified by silica gel chromatography (gradient from 0% to 20% EtOAc/hexane) to afford a light-yellow liquid.

**IR** (Neat): 3287, 2965, 1597, 1498, 1326, 1259, 1155, 1096, 833cm<sup>-1</sup>;

**<sup>1</sup>H NMR** (500 MHz, CDCl<sub>3</sub>) δ 7.80-7.76 (m, 2H), 7.00-6.96 (m, 2H), 5.07-5.03 (m, 1H), 4.38 (br, 1H), 3.88 (s, 3H), 2.67 (d, J = 7.0 Hz, 2H), 1.86 (d, J = 8.0 Hz, 2H), 1.68 (s, 6H), 1.56 (s, 3H), 0.84 (s, 6H);

**<sup>13</sup>C NMR** (126 MHz, CDCl<sub>3</sub>) δ = 162.77, 134.11, 131.54, 129.21, 119.71, 114.18, 55.61, 52.97, 37.85, 34.86, 26.04, 24.90, 17.91;

**HRMS** (ESI) exact mass calculated for [M] (C<sub>16</sub>H<sub>25</sub>NO<sub>3</sub>S) from [M+H]<sup>+</sup> requires m/z 311.15551, found m/z 311.15542, difference 0.29 ppm.

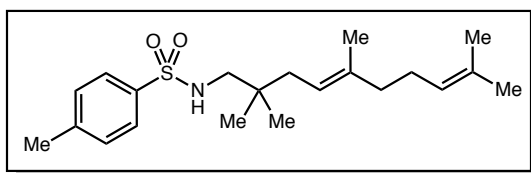

(E)-4-methyl-N-(2,2,5,9-tetramethyldeca-4,8-dien-1-yl)benzenesulfonamide

The title sulfonamide was synthesized following the general procedure found above. (E)-2,2,5,9-tetramethyldeca-4,8-dien-1-amine was synthesized corresponding to an alteration of a reported method,<sup>7</sup> using (E)-1-bromo-3,7-dimethylocta-2,6-diene instead of allyl bromide and carried on for use in this reaction without purification. The title sulfonamide was purified by silica gel chromatography (gradient from 0% to 20% EtOAc/hexane) to afford a light-yellow liquid.

**IR** (Neat): 3284, 2964, 1598, 1498, 1326, 1259, 1155, 1096, 833, 669cm<sup>-1</sup>;

**<sup>1</sup>H NMR** (500 MHz, CDCl<sub>3</sub>) δ 7.81-7.76 (m, 2H), 6.99-6.95 (m, 2H), 5.06-5.02 (m, 2H), 4.44 (br, 1H), 3.88 (s, 3H), 2.67 (d, J = 7.0 Hz, 2H), 2.06-2.02 (m, 2H), 1.99-1.96 (m, 2H), 1.88 (d, J = 8.0 Hz, 2H), 1.66 (s, 3H), 1.59 (s, 3H), 1.54 (s, 3H), 0.83 (s, 6H);

**<sup>13</sup>C NMR** (126 MHz, CDCl<sub>3</sub>) δ = 162.76, 137.64, 131.55, 129.20, 124.20, 119.78, 114.18, 55.59, 53.02, 40.03, 37.67, 34.96, 26.60, 25.74, 24.83, 17.71, 16.17;

**HRMS** (ESI) exact mass calculated for [M] (C<sub>21</sub>H<sub>33</sub>NO<sub>3</sub>S) from [M+H]<sup>+</sup> requires m/z 379.21811, found m/z 379.21884, difference 1.91 ppm.

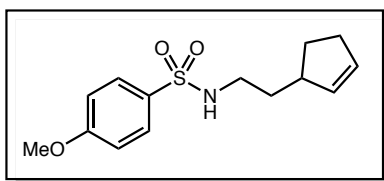

N-(2-(cyclopent-2-en-1-yl)ethyl)-4-methoxybenzenesulfonamide

The title sulfonamide was synthesized following the general procedure found above. 2-(cyclopent-2-en-1-

yl)ethan-1-amine was synthesized according to published procedure<sup>8</sup> and carried on for use in this reaction without purification. The title sulfonamide was purified by silica gel chromatography (gradient from 0% to 20% EtOAc/hexane) to afford a light-yellow liquid.

**IR** (Neat): 3281, 2939, 1597, 1498, 1323, 1260, 1152, 1096, 834, 671 $\text{cm}^{-1}$ ;

**<sup>1</sup>H NMR** (500 MHz,  $\text{CDCl}_3$ )  $\delta$  7.82-7.78 (m, 2H), 7.00-6.96 (m, 2H), 5.72-5.69 (m, 1H), 5.57-5.54 (m, 1H), 4.62 (br, 1H), 3.88 (s, 3H), 2.99-2.92 (m, 2H), 2.68-2.61 (m, 1H), 2.33-2.20 (m, 2H), 2.01-1.94 (m, 1H), 1.60-1.54 (m, 1H), 1.48-1.41 (m, 1H), 1.34-1.28 (m, 1H);

**<sup>13</sup>C NMR** (126 MHz,  $\text{CDCl}_3$ )  $\delta$  = 162.82, 133.79, 131.47, 131.20, 129.22, 114.23, 55.63, 42.74, 41.87, 35.60, 31.89, 29.48;

**HRMS** (ESI) exact mass calculated for [M] ( $\text{C}_{14}\text{H}_{19}\text{NO}_3\text{S}$ ) from [M+H]<sup>+</sup> requires m/z 281.10856, found m/z 281.10849, difference 0.28 ppm.

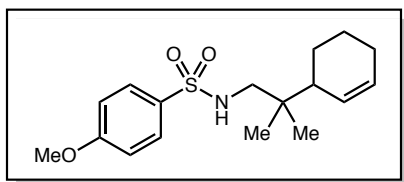

*N*-(2-(cyclohex-2-en-1-yl)-2-methylpropyl)-4-methoxybenzenesulfonamide

The title sulfonamide was synthesized following the general procedure found above. 2-(cyclohex-2-en-1-yl)-2-methylpropan-1-amine was synthesized corresponding to an alteration of a reported method,<sup>7</sup> using 3-bromocyclohex-1-ene instead of allyl bromide and carried on crude for use in this reaction without purification. The title sulfonamide was purified by silica gel chromatography (gradient from 0% to 20% EtOAc/hexane) to afford a colorless liquid.

**IR** (Neat): 3283, 2932, 1597, 1498, 1325, 1259, 1153, 1096, 834, 671 $\text{cm}^{-1}$ ;

**<sup>1</sup>H NMR** (500 MHz,  $\text{CDCl}_3$ )  $\delta$  7.81-7.76 (m, 2H), 7.00-6.96 (m, 2H), 5.77-5.71 (m, 1H), 5.57-5.53 (m, 1H), 4.46 (br, 1H), 3.88 (s, 3H), 2.65 (d,  $J$  = 7.0 Hz, 2H), 2.05-1.99 (m, 1H), 1.96-1.85 (m, 2H), 1.85-1.72 (m, 1H), 1.68-1.63 (m, 1H), 1.48-1.39 (m, 1H), 1.19-1.11 (m, 1H), 0.83 (d,  $J$  = 9.0 Hz, 6H);

**<sup>13</sup>C NMR** (126 MHz,  $\text{CDCl}_3$ )  $\delta$  = 162.78, 131.49, 129.21, 127.57, 114.21, 55.62, 51.36, 41.98, 36.16, 25.10, 23.80, 23.26, 22.56, 22.52;

**HRMS** (ESI) exact mass calculated for [M] ( $\text{C}_{17}\text{H}_{25}\text{NO}_3\text{S}$ ) from [M+H]<sup>+</sup> requires m/z 323.15551, found m/z 323.15593, difference 1.28 ppm.

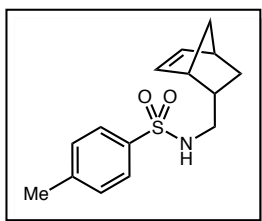

(±)-*N*-(((1*S*,2*S*,4*S*)-bicyclo[2.2.1]hept-5-en-2-yl)methyl)-4-methylbenzenesulfonamide

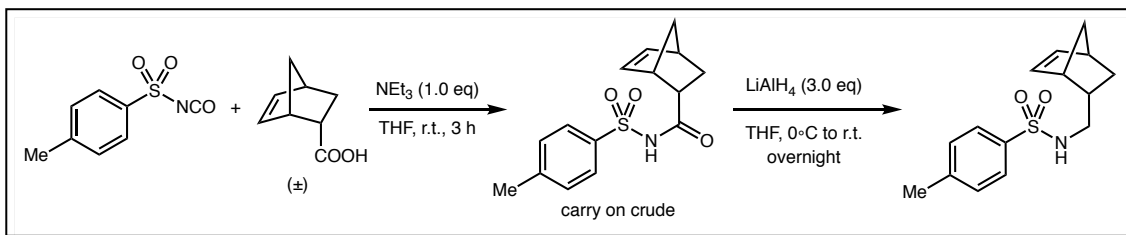

(±)-(1S,2S,4S)-N-tosylbicyclo[2.2.1]hept-5-ene-2-carboxamide was synthesized according to a reported procedure.<sup>9</sup> The crude intermediate was reduced by LAH in the same manner described before. The crude product (~3:1 exo:endo) was purified by silica gel chromatography (gradient from 0% to 15% EtOAc/hexane) to afford the exo-substrate as a light-yellow liquid (1.23 g, 29% yield over two steps).

**IR** (Neat): 3279, 2965, 1599, 1425, 1323, 1157, 1094, 815, 667 $\text{cm}^{-1}$ ;

**<sup>1</sup>H NMR** (500 MHz,  $\text{CDCl}_3$ )  $\delta$  7.78-7.74 (m, 2H), 7.34-7.30 (m, 2H), 6.12-6.09 (m, 1H), 5.79-5.75 (m, 1H), 4.62 (br, 1H), 2.83-2.77 (m, 2H), 2.74-2.70 (m, 1H), 2.61-2.57 (m, 1H), 2.45 (s, 3H), 2.21-2.15 (m, 1H), 1.83-1.78 (m, 1H), 1.45-1.41 (m, 1H), 1.24-1.20 (m, 1H), 0.49-0.45 (m, 1H);

**<sup>13</sup>C NMR** (126 MHz,  $\text{CDCl}_3$ )  $\delta$  = 143.31, 137.90, 136.89, 131.64, 129.67, 127.10, 49.44, 47.14, 43.96, 42.33, 38.89, 30.04, 21.55;

**HRMS** (ESI) exact mass calculated for  $[\text{M}]$  ( $\text{C}_{15}\text{H}_{19}\text{NO}_2\text{S}$ ) from  $[\text{M}+\text{H}]^+$  requires  $m/z$  277.11365, found  $m/z$  277.11420, difference 1.99 ppm.

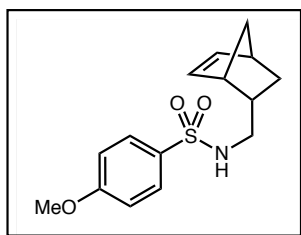

(±)-N-(((1S,2S,4S)-bicyclo[2.2.1]hept-5-en-2-yl)methyl)-4-methoxybenzenesulfonamide

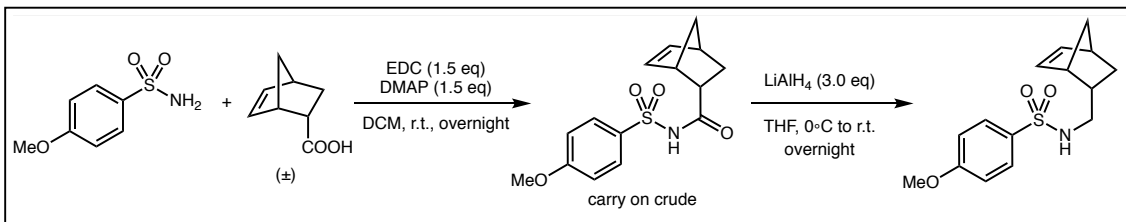

(±)-(1S,2S,4S)-N-((4-methoxyphenyl)sulfonyl)bicyclo[2.2.1]hept-5-ene-2-carboxamide was synthesized according to a reported procedure.<sup>10</sup> To an ice-cold THF solution of the crude intermediate (1.0 eq, 15 mmol, 4.61g),  $\text{LiAlH}_4$  (3.0 eq, 45 mmol, 1.71g) was added in small portions. After addition, the reaction was warmed up to room temperature and stirred overnight. The reaction was then cooled in an ice-bath. Next, 1.7mL water, 1.7 mL 15%  $\text{NaOH}$ (aq) solution and 5.1 mL water were sequentially added dropwise. This was followed by the addition of 2.0 gram of anhydrous magnesium sulfate and then the mixture was stirred for half an hour. The resulting mixture was filtered through a celite

plug to remove the white solid. The filtrate was concentrated under reduced pressure and purified the crude product (~3:1 exo:end), which was then purified by silica gel chromatography (gradient from 0% to 20% EtOAc/hexane) to afford the sulfonamide as a white solid (1.12 g, 25% yield over two steps).

**IR** (Neat): 3278, 2965, 1597, 1498, 1322, 1259, 1152, 1096, 833, 671 $\text{cm}^{-1}$ ;

**$^1\text{H}$  NMR** (500 MHz,  $\text{CDCl}_3$ )  $\delta$  7.80-7.76 (m, 2H), 7.00-6.96 (m, 2H), 6.11-6.07 (m, 1H), 5.78-5.74 (m, 1H), 4.58 (br, 1H), 3.85 (s, 3H), 2.80-2.73 (m, 2H), 2.70-2.65 (m, 1H), 2.56-2.50 (m, 1H), 2.17-2.10 (m, 1H), 1.79-1.73 (m, 1H), 1.41-1.36 (m, 1H), 1.19-1.16 (m, 1H), 0.45-0.40 (m, 1H);

**$^{13}\text{C}$  NMR** (126 MHz,  $\text{CDCl}_3$ )  $\delta$  = 162.78, 137.90, 131.64, 131.47, 129.21, 114.24, 55.62, 49.44, 47.11, 43.96, 42.33, 38.84, 30.05;

**HRMS** (ESI) exact mass calculated for  $[\text{M}]$  ( $\text{C}_{15}\text{H}_{19}\text{NO}_3\text{S}$ ) from  $[\text{M}+\text{H}]^+$  requires  $m/z$  293.10856, found  $m/z$  293.10852, difference 0.14 ppm.

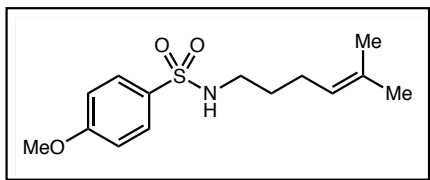

4-methoxy-N-(5-methylhex-4-en-1-yl)benzenesulfonamide

The title sulfonamide was synthesized following the general procedure found above. The title sulfonamide was purified by silica gel chromatography (gradient from 0% to 20% EtOAc/hexane) to afford a light-yellow solid.

**IR** (Neat): 3281, 2928, 1710, 1597, 1259, 1154, 834  $\text{cm}^{-1}$ ;

**$^1\text{H}$  NMR** (500 MHz,  $\text{CDCl}_3$ )  $\delta$  7.81-7.78 (m, 2H), 7.00-6.97 (m, 2H), 5.02 – 4.98 (m, 1H), 4.32 (br, 1H), 3.88 (s, 3H), 2.93 (q,  $J$  = 6.5 Hz, 2H), 1.96 (q,  $J$  = 7.0 Hz, 2H), 1.66 (s, 3H), 1.55 (s, 3H), 1.52-1.46 (m, 2H);

**$^{13}\text{C}$  NMR** (126 MHz,  $\text{CDCl}_3$ )  $\delta$  = 162.82, 132.84, 131.55, 129.21, 122.92, 114.20, 55.62, 42.90, 29.56, 25.70, 25.08, 17.72.;

**HRMS** (ESI) exact mass calculated for  $[\text{M}]$  ( $\text{C}_{14}\text{H}_{21}\text{NO}_3\text{S}$ ) from  $[\text{M}+\text{H}]^+$  requires  $m/z$  283.12421, found  $m/z$  283.12448, difference 0.92 ppm.

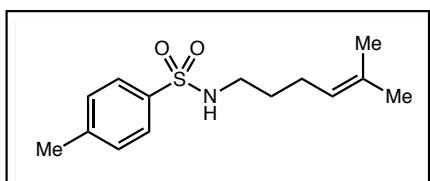

4-methyl-N-(5-methylhex-4-en-1-yl)benzenesulfonamide

The title sulfonamide was synthesized following the general procedure found above. The title sulfonamide was purified by silica gel chromatography (gradient from 0% to 15% EtOAc/hexane) to afford a light-yellow oil.

**IR** (Neat): 3281, 2926, 1439, 1325, 1158, 1095, 815, 664  $\text{cm}^{-1}$ ;

**$^1\text{H}$  NMR** (500 MHz,  $\text{CDCl}_3$ )  $\delta$  7.77-7.73 (m, 2H), 7.34-7.28 (m, 2H), 5.00 – 4.97 (m, 1H), 4.58 (br, 1H), 2.93 (q,  $J$  = 7.0 Hz, 2H), 2.43 (s, 3H), 1.95 (q,  $J$  = 7.0 Hz, 2H), 1.65 (s, 3H), 1.54 (s, 3H), 1.51-1.46 (m, 2H);

**$^{13}\text{C}$  NMR** (126 MHz,  $\text{CDCl}_3$ )  $\delta$  = 143.33, 136.94, 132.77, 129.68, 127.11, 122.95, 42.92, 29.57, 25.69, 25.07, 21.54, 17.69.;

**HRMS** (ESI) exact mass calculated for [M] (C<sub>14</sub>H<sub>21</sub>NO<sub>2</sub>S) from [M+H]<sup>+</sup> requires m/z 267.12930, found m/z 267.12910, difference 0.74 ppm.

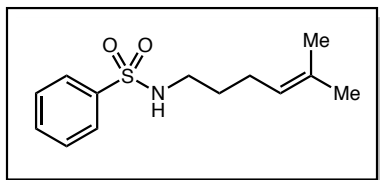

N-(5-methylhex-4-en-1-yl)benzenesulfonamide

The title sulfonamide was synthesized following the general procedure found above. The title sulfonamide was purified by silica gel chromatography (gradient from 0% to 15% EtOAc/hexane) to afford a light-yellow

liquid.

**IR** (Neat): 3283, 2928, 1447, 1325, 1159, 1095, 755, 690 cm<sup>-1</sup>;

**<sup>1</sup>H NMR** (500 MHz, CDCl<sub>3</sub>) δ 7.89-7.86 (m, 2H), 7.60-7.57 (m, 1H), 7.55-7.51 (m, 2H), 5.01 – 4.95 (m, 1H), 4.57 (br, 1H), 2.95 (q, *J* = 7.0 Hz, 2H), 1.95 (q, *J* = 7.0 Hz, 2H), 1.65 (s, 3H), 1.54 (s, 3H), 1.52-1.47 (m, 2H);

**<sup>13</sup>C NMR** (126 MHz, CDCl<sub>3</sub>) δ = 139.94, 132.86, 132.59, 129.09, 127.04, 122.88, 42.96, 29.58, 25.69, 25.05, 17.70.;

**HRMS** (ESI) exact mass calculated for [M] (C<sub>13</sub>H<sub>19</sub>NO<sub>2</sub>S) from [M+H]<sup>+</sup> requires m/z 253.11365, found m/z 253.11331, difference 1.33 ppm.

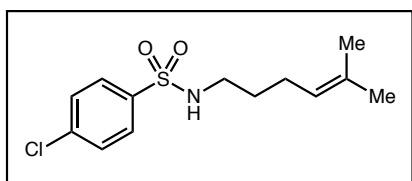

4-chloro-N-(5-methylhex-4-en-1-yl)benzenesulfonamide

The title sulfonamide was synthesized following the general procedure found above. The title sulfonamide was purified by silica gel chromatography (gradient

from 0% to 15% EtOAc/hexane) to afford a light-yellow solid.

**IR** (Neat): 3283, 2928, 1477, 1328, 1161, 1095, 1085, 827, 753cm<sup>-1</sup>;

**<sup>1</sup>H NMR** (500 MHz, CDCl<sub>3</sub>) δ 7.75-7.71 (m, 2H), 7.67-7.63 (m, 2H), 5.01 – 4.96 (m, 1H), 4.70 (br, 1H), 2.95 (q, *J* = 7.0 Hz, 2H), 1.96 (q, *J* = 7.0 Hz, 2H), 1.66 (s, 3H), 1.54 (s, 3H), 1.53-1.47 (m, 2H);

**<sup>13</sup>C NMR** (126 MHz, CDCl<sub>3</sub>) δ = 139.05, 132.98, 132.38, 128.63, 127.54, 122.76, 42.95, 29.57, 25.70, 25.01, 17.72;

**HRMS** (ESI) exact mass calculated for [M] (C<sub>13</sub>H<sub>18</sub>ClNO<sub>2</sub>S) from [M+H]<sup>+</sup> requires m/z 287.07468, found m/z 287.07467, difference 0.03 ppm.

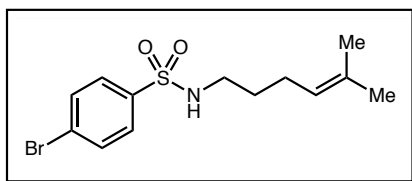

4-bromo-N-(5-methylhex-4-en-1-yl)benzenesulfonamide

The title sulfonamide was synthesized following the general procedure found above. The title sulfonamide was purified by silica gel chromatography (gradient

from 0% to 15% EtOAc/hexane) to afford a light-yellow solid.

**IR** (Neat): 3282, 2926, 1576, 1327, 1160, 1092, 1069, 822, 739cm<sup>-1</sup>;

**<sup>1</sup>H NMR** (500 MHz, CDCl<sub>3</sub>) δ 7.83-7.80 (m, 2H), 7.50-7.46 (m, 2H), 5.01 – 4.96 (m, 1H), 4.71 (br, 1H), 2.95 (q, *J* = 7.0 Hz, 2H), 1.96 (q, *J* = 7.0 Hz, 2H), 1.66 (s, 3H), 1.54 (s, 3H), 1.53-1.47 (m, 2H);

**<sup>13</sup>C NMR** (126 MHz, CDCl<sub>3</sub>) δ = 139.05, 132.98, 132.38, 128.63, 127.54, 122.76, 42.95, 29.58, 25.70, 25.01, 17.72;

**HRMS** (ESI) exact mass calculated for [M] (C<sub>13</sub>H<sub>18</sub>BrNO<sub>2</sub>S) from [M+H]<sup>+</sup> requires *m/z* 331.02416, found *m/z* 331.02450, difference 1.03 ppm.

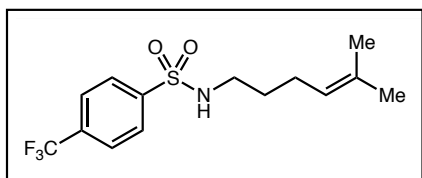

*N*-(5-methylhex-4-en-1-yl)-4-(trifluoromethyl)benzenesulfonamide

The title sulfonamide was synthesized following the general procedure found above. The title sulfonamide was purified by silica gel chromatography (gradient from 0% to 15% EtOAc/hexane) to afford a light-yellow solid.

**IR** (Neat): 3287, 2929, 1405, 1323, 1165, 1134, 1063, 843, 711 cm<sup>-1</sup>;

**<sup>1</sup>H NMR** (500 MHz, CDCl<sub>3</sub>) δ 8.01 (d, *J* = 8.5 Hz, 2H), 7.79 (d, *J* = 8.5 Hz, 2H), 5.01 – 4.95 (m, 1H), 4.70 (br, 1H), 2.99 (q, *J* = 7.0 Hz, 2H), 1.96 (q, *J* = 7.0 Hz, 2H), 1.65 (s, 3H), 1.54 (s, 3H), 1.53-1.48 (m, 2H);

**<sup>13</sup>C NMR** (126 MHz, CDCl<sub>3</sub>) δ = 143.66, 134.34 (q, *J* = 33.0 Hz), 133.08, 127.56, 126.30 (q, *J* = 3.7 Hz), 123.23 (q, *J* = 273.2 Hz), 122.65, 43.01, 29.61, 25.66, 24.97, 17.69;

**<sup>19</sup>F NMR** (470 MHz, CDCl<sub>3</sub>) δ = -63.12;

**HRMS** (ESI) exact mass calculated for [M] (C<sub>14</sub>H<sub>18</sub>F<sub>3</sub>NO<sub>2</sub>S) from [M+H]<sup>+</sup> requires *m/z* 321.10103, found *m/z* 321.10057, difference 1.45 ppm.

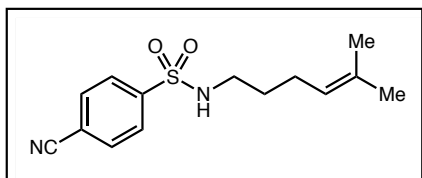

4-cyano-*N*-(5-methylhex-4-en-1-yl)benzenesulfonamide

The title sulfonamide was synthesized following the general procedure found above. The title sulfonamide was purified by silica gel chromatography (gradient from 0% to 25% EtOAc/hexane) to afford a white solid.

**IR** (Neat): 3264, 2915, 2239, 1434, 1323, 1153, 1089, 845, 675cm<sup>-1</sup>;

**<sup>1</sup>H NMR** (500 MHz, CDCl<sub>3</sub>) δ 7.99-7.96 (m, 2H), 7.85-7.82 (m, 2H), 5.01-4.97 (m, 1H), 4.72 (br, 1H), 3.01-2.97 (m, 2H), 1.99-1.94 (m, 2H), 1.66 (s, 3H), 1.55-1.48 (m, 5H);

**<sup>13</sup>C NMR** (126 MHz, CDCl<sub>3</sub>) δ = 144.43, 133.17, 132.96, 127.67, 122.58, 117.34, 116.34, 43.05, 29.64, 25.70, 24.96, 17.73;

**HRMS** (ESI) exact mass calculated for [M] (C<sub>14</sub>H<sub>18</sub>N<sub>2</sub>O<sub>2</sub>S) from [M+H]<sup>+</sup> requires *m/z* 278.10890, found *m/z* 278.10904, difference 0.51 ppm.

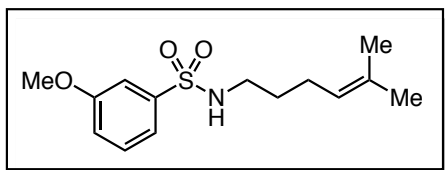

3-methoxy-*N*-(5-methylhex-4-en-1-yl)benzenesulfonamide

The title sulfonamide was synthesized following the general procedure found above. The title sulfonamide was purified by silica gel chromatography (gradient from 0% to 25% EtOAc/hexane) to afford a light-yellow oil.

**IR** (Neat): 3282, 2929, 1598, 1478, 1431, 1316, 1245, 1154, 1038, 685 $\text{cm}^{-1}$ ;  
 **$^1\text{H}$  NMR** (500 MHz,  $\text{CDCl}_3$ )  $\delta$  = 7.46-7.40 (m, 2H), 7.39-7.38 (m, 1H), 7.11-7.09 (m, 1H), 5.01-4.98 (m, 1H), 4.63 (br, 1H), 3.86 (s, 3H), 2.96 (q,  $J$  = 6.7 Hz, 2H), 1.96 (q,  $J$  = 7.3 Hz, 2H), 1.65 (s, 3H), 1.54 (s, 3H), 1.53-1.47 (m, 2H);  
 **$^{13}\text{C}$  NMR** (126 MHz,  $\text{CDCl}_3$ )  $\delta$  = 159.93, 141.05, 132.84, 130.14, 122.89, 119.19, 118.99, 111.71, 55.66, 43.01, 29.58, 25.68, 25.05, 17.69;  
**HRMS** (ESI) exact mass calculated for  $[\text{M}]$  ( $\text{C}_{14}\text{H}_{21}\text{NO}_3\text{S}$ ) from  $[\text{M}+\text{H}]^+$  requires  $m/z$  283.12421, found  $m/z$  283.12387, difference 1.23 ppm.

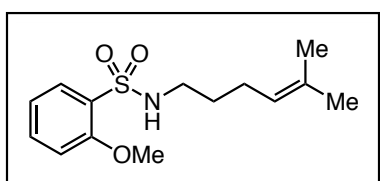

2-methoxy-N-(5-methylhex-4-en-1-yl)benzenesulfonamide

The title sulfonamide was synthesized following the general procedure found above. The title sulfonamide was purified by silica gel chromatography (gradient from 0% to 25% EtOAc/hexane) to afford a light-yellow oil.

**IR** (Neat): 3302, 2931, 1592, 1480, 1325, 1279, 1157, 1071, 1019, 758 $\text{cm}^{-1}$ ;  
 **$^1\text{H}$  NMR** (500 MHz,  $\text{CDCl}_3$ )  $\delta$  = 7.91 (dd,  $J$  = 7.8, 1.7 Hz, 1H), 7.55 (ddd, 1H), 7.08 (td,  $J$  = 7.6, 1.0 Hz, 1H), 7.04 (dd,  $J$  = 8.4, 0.9 Hz, 1H), 4.98 (tdt,  $J$  = 7.2, 2.8, 1.4 Hz, 1H), 4.90 (t,  $J$  = 6.3 Hz, 1H), 3.98 (s, 3H), 2.87 (q,  $J$  = 6.8 Hz, 2H), 1.95 (q,  $J$  = 7.3 Hz, 2H), 1.65 (s, 3H), 1.55 (s, 3H), 1.51-1.45 (m, 2H);  
 **$^{13}\text{C}$  NMR** (126 MHz,  $\text{CDCl}_3$ )  $\delta$  = 156.09, 134.44, 132.68, 130.46, 127.32, 122.92, 120.73, 112.04, 56.35, 43.12, 29.59, 25.69, 25.02, 17.70;  
**HRMS** (ESI) exact mass calculated for  $[\text{M}]$  ( $\text{C}_{14}\text{H}_{21}\text{NO}_3\text{S}$ ) from  $[\text{M}+\text{H}]^+$  requires  $m/z$  283.12421, found  $m/z$  283.12468, difference 1.66 ppm.

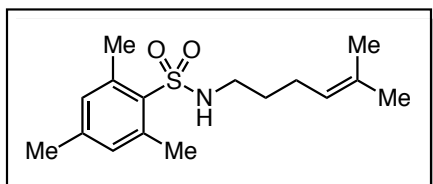

2,4,6-trimethyl-N-(5-methylhex-4-en-1-yl)benzenesulfonamide

The title sulfonamide was synthesized following the general procedure found above. The title sulfonamide was purified by silica gel chromatography (gradient from 0% to 16% EtOAc/hexane) to afford a light-yellow oil.

**IR** (Neat): 3304, 2929, 1604, 1447, 1320, 1151, 1082, 851 $\text{cm}^{-1}$ ;  
 **$^1\text{H}$  NMR** (500 MHz,  $\text{CDCl}_3$ )  $\delta$  = 6.96 (s, 2H), 5.01 – 4.93 (m, 1H), 4.53 (br, 1H), 2.89 (q,  $J$  = 6.8 Hz, 2H), 2.64 (s, 6H), 2.30 (s, 3H), 1.93 (q,  $J$  = 7.3 Hz, 2H), 1.65 (s, 3H), 1.54 (s, 3H), 1.52 – 1.42 (m, 2H);  
 **$^{13}\text{C}$  NMR** (126 MHz,  $\text{CDCl}_3$ )  $\delta$  = 142.09, 139.06, 133.65, 132.79, 131.94, 122.97, 42.29, 29.59, 25.68, 25.13, 22.98, 20.94, 17.68;



**HRMS** (ESI) exact mass calculated for [M] (C<sub>16</sub>H<sub>25</sub>NO<sub>2</sub>S) from [M+H]<sup>+</sup> requires m/z 295.16060, found m/z 295.16046, difference 0.49 ppm.

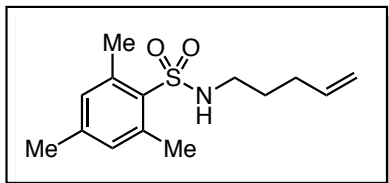

2,4,6-trimethyl-N-(pent-4-en-1-yl)benzenesulfonamide

oil.

The title sulfonamide was synthesized following the general procedure found above. The title sulfonamide was purified by silica gel chromatography (gradient from 0% to 20% EtOAc/hexane) to afford a colorless

**IR** (Neat): 3306, 2938, 1604, 1452, 1320, 1153, 1083, 852, 654cm<sup>-1</sup>;

**<sup>1</sup>H NMR** (500 MHz, CDCl<sub>3</sub>) δ = 6.96 (s, 2H), 5.78 – 5.62 (m, 1H), 5.03 – 4.90 (m, 2H), 4.47 (s, 1H), 2.91 (q, *J* = 6.8 Hz, 2H), 2.64 (s, 6H), 2.30 (s, 3H), 2.10 – 1.96 (m, 2H), 1.64 – 1.49 (m, 2H).

**<sup>13</sup>C NMR** (126 MHz, CDCl<sub>3</sub>) δ = 142.15, 139.05, 137.24, 133.62, 131.96, 115.61, 42.04, 30.77, 28.68, 22.98, 20.94;

**HRMS** (ESI) exact mass calculated for [M] (C<sub>14</sub>H<sub>21</sub>NO<sub>2</sub>S) from [M+H]<sup>+</sup> requires m/z 267.12930, found m/z 267.12893, difference 1.37 ppm.

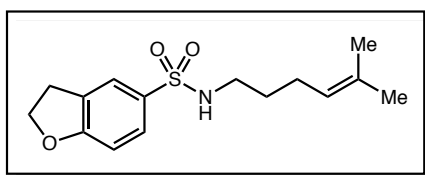

N-(5-methylhex-4-en-1-yl)-2,3-dihydrobenzofuran-5-sulfonamide

The title sulfonamide was synthesized following the general procedure found above. The title sulfonamide was purified by silica gel chromatography (gradient from 0% to 25% EtOAc/hexane) to afford a light-yellow oil.

**IR** (Neat): 3280, 2923, 1606, 1486, 1328, 1241, 1144, 1066, 899, 821cm<sup>-1</sup>;

**<sup>1</sup>H NMR** (500 MHz, CDCl<sub>3</sub>) δ 7.70-7.67 (m, 1H), 7.66-7.64 (m, 1H), 6.84 (d, *J* = 8.0 Hz, 1H), 5.02-4.98 (m, 1H), 4.68 (t, *J* = 8.5 Hz, 2H), 4.49 (br, 1H), 3.27 (t, *J* = 8.5 Hz, 2H), 2.92 (q, *J* = 6.5 Hz, 2H), 1.99-1.93 (m, 2H), 1.66 (s, 3H), 1.55 (s, 3H), 1.53-1.47 (m, 2H);

**<sup>13</sup>C NMR** (126 MHz, CDCl<sub>3</sub>) δ = 163.70, 132.75, 131.43, 128.66, 128.29, 124.38, 122.99, 109.44, 72.26, 42.90, 29.58, 29.12, 25.70, 25.11, 17.70;

**HRMS** (ESI) exact mass calculated for [M] (C<sub>15</sub>H<sub>20</sub>NO<sub>3</sub>S) from [M+H]<sup>+</sup> requires m/z 295.12421, found m/z 295.12432, difference 0.37 ppm.

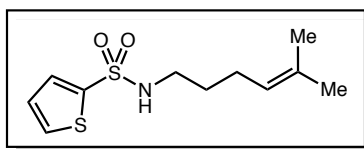

N-(5-methylhex-4-en-1-yl)thiophene-2-sulfonamide

The title sulfonamide was synthesized following the general procedure found above. The title sulfonamide was purified by silica gel chromatography (gradient from 0% to 16% EtOAc/hexane) to afford a colorless liquid.

**IR** (Neat): 3284, 2967, 1406, 1328, 1154, 1092, 1017, 721, 667cm<sup>-1</sup>;

**<sup>1</sup>H NMR** (500 MHz, CDCl<sub>3</sub>) δ 7.62-7.58 (m, 2H), 7.11-7.08 (m, 1H), 5.03-5.00 (m, 1H), 4.71 (br, 1H), 3.06-3.01 (m, 2H), 2.01-1.97 (m, 2H), 1.66 (s, 3H), 1.56-1.51 (m, 5H);

**<sup>13</sup>C NMR** (126 MHz, CDCl<sub>3</sub>) δ = 140.94, 132.93, 132.05, 131.73, 127.38, 122.87, 43.21, 29.45, 25.71, 25.08, 17.72;

**HRMS** (ESI) exact mass calculated for [M] (C<sub>11</sub>H<sub>17</sub>NO<sub>2</sub>S<sub>2</sub>) from [M+H]<sup>+</sup> requires m/z 259.07007, found m/z 259.07053, difference 1.78 ppm.

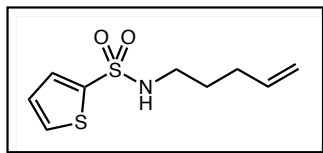

N-(pent-4-en-1-yl)thiophene-2-sulfonamide

The title sulfonamide was synthesized following the general procedure found above. The title sulfonamide was purified by silica gel chromatography (gradient from 0% to 20% EtOAc/hexane) to afford a colorless liquid.

**IR** (Neat): 3284, 2936, 1406, 1326, 1154, 1017, 915, 721, 667cm<sup>-1</sup>;

**<sup>1</sup>H NMR** (500 MHz, CDCl<sub>3</sub>) δ = 7.67 – 7.52 (m, 2H), 7.15 – 7.01 (m, 1H), 5.91 – 5.59 (m, 1H), 5.10 – 4.91 (m, 2H), 4.49 (s, 1H), 3.06 (d, *J* = 6.9 Hz, 2H), 2.16 – 1.98 (m, 2H), 1.71 – 1.56 (m, 2H).

**<sup>13</sup>C NMR** (126 MHz, CDCl<sub>3</sub>) δ = 140.94, 137.11, 132.12, 131.80, 127.38, 115.77, 42.95, 30.69, 28.58.

**HRMS** (ESI) exact mass calculated for [M] (C<sub>9</sub>H<sub>13</sub>NO<sub>2</sub>S<sub>2</sub>) from [M+H]<sup>+</sup> requires m/z 231.03877, found m/z 231.03838, difference 1.7 ppm.

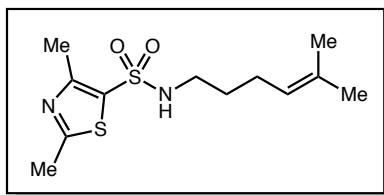

2,4-dimethyl-N-(5-methylhex-4-en-1-yl)thiazole-5-sulfonamide

The title sulfonamide was synthesized following the general procedure found above. The title sulfonamide was purified by silica gel chromatography (gradient from 0% to 25% EtOAc/hexane) to afford a light-yellow oil.

**IR** (Neat): 3290, 2926, 1440, 1332, 1157, 1083, 652cm<sup>-1</sup>;

**<sup>1</sup>H NMR** (500 MHz, CDCl<sub>3</sub>) δ 5.05-5.01 (m, 1H), 4.82 (br, 1H), 3.06-3.02 (m, 2H), 2.69 (s, 3H), 2.61 (s, 3H), 2.03-1.98 (m, 2H), 1.68 (s, 3H), 1.58-1.52 (m, 5H);

**<sup>13</sup>C NMR** (126 MHz, CDCl<sub>3</sub>) δ = 168.51, 155.73, 133.06, 129.66, 122.74, 42.99, 29.52, 25.70, 25.07, 19.42, 17.73, 16.36;

**HRMS** (ESI) exact mass calculated for [M] (C<sub>12</sub>H<sub>20</sub>N<sub>2</sub>O<sub>3</sub>S<sub>2</sub>) from [M+H]<sup>+</sup> requires m/z 288.09662, found m/z 288.09646, difference 0.56 ppm.

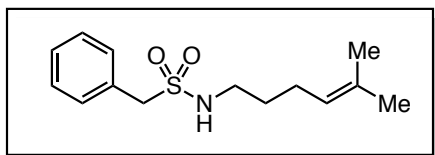

N-(5-methylhex-4-en-1-yl)-1-phenylmethanesulfonamide

The title sulfonamide was synthesized following the general procedure found above. The title sulfonamide was purified by silica gel chromatography (gradient from 0% to 16% EtOAc/hexane) to afford a white solid.

**IR** (Neat): 3230, 2919, 1456, 1305, 1133, 1068, 909, 781, 732, 694cm<sup>-1</sup>;

**<sup>1</sup>H NMR** (500 MHz, CDCl<sub>3</sub>) δ = 7.44 – 7.30 (m, 5H), 5.07 – 4.97 (m, 1H), 4.24 (br, 2H), 4.11 (s, 1H), 2.97 (q, *J* = 6.8 Hz, 2H), 1.97 (q, *J* = 7.3 Hz, 2H), 1.68 (s, 3H), 1.59 – 1.46 (m, 5H);

**<sup>13</sup>C NMR** (126 MHz, CDCl<sub>3</sub>) δ = 132.86, 130.58, 129.47, 128.85, 128.73, 122.87, 58.65, 43.42, 30.36, 25.72, 25.01, 17.75;

**HRMS** (ESI) exact mass calculated for [M] (C<sub>14</sub>H<sub>21</sub>NO<sub>2</sub>S) from [M+Na]<sup>+</sup> requires *m/z* 267.12930, found *m/z* 267.12883, difference 1.76 ppm.

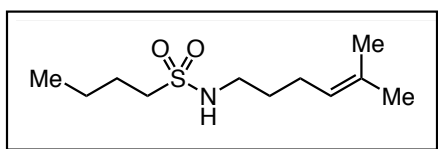

N-(5-methylhex-4-en-1-yl)butane-1-sulfonamide

The title sulfonamide was synthesized following the general procedure found above. The title sulfonamide was purified by silica gel chromatography (gradient from 0% to 20% EtOAc/hexane) to afford a colorless oil.

**IR** (Neat): 3285, 2932, 1440, 1319, 1142, 1080, 840cm<sup>-1</sup>;

**<sup>1</sup>H NMR** (500 MHz, CDCl<sub>3</sub>) δ = 5.14 – 5.03 (m, 1H), 4.50 (br, 1H), 3.15 – 3.05 (m, 2H), 3.05 – 2.94 (m, 2H), 2.05 (q, *J* = 7.4 Hz, 2H), 1.84 – 1.74 (m, 2H), 1.69 (s, 3H), 1.64 – 1.56 (m, 5H), 1.51 – 1.41 (m, 2H), 0.95 (t, *J* = 7.4 Hz, 3H).

**<sup>13</sup>C NMR** (126 MHz, CDCl<sub>3</sub>) δ = 132.81, 122.96, 52.27, 42.92, 30.36, 25.72, 25.66, 25.08, 21.56, 17.75, 13.62

**HRMS** (ESI) exact mass calculated for [M] (C<sub>11</sub>H<sub>24</sub>NO<sub>2</sub>S) from [M+H]<sup>+</sup> requires *m/z* 233.14495, found *m/z* 233.14482, difference 0.56 ppm.

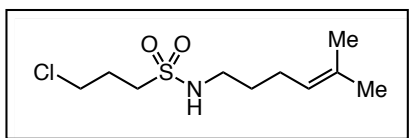

3-chloro-N-(5-methylhex-4-en-1-yl)propane-1-sulfonamide

The title sulfonamide was synthesized following the general procedure found above. The title sulfonamide was purified by silica gel chromatography (gradient from 0% to 25% EtOAc/hexane) to afford a light-yellow solid.

**IR** (Neat): 3269, 2967, 1432, 1311, 1138, 1121, 1064, 915, 794, 719cm<sup>-1</sup>;

**<sup>1</sup>H NMR** (500 MHz, CDCl<sub>3</sub>) δ = 5.15 – 5.02 (m, 1H), 4.50 – 4.35 (m, 1H), 3.69 (t, *J* = 6.2 Hz, 2H), 3.19 (d, *J* = 6.3 Hz, 2H), 3.12 (q, *J* = 6.7 Hz, 2H), 2.34 – 2.23 (m, 2H), 2.06 (q, *J* = 7.2 Hz, 2H), 1.70 (d, *J* = 1.4 Hz, 3H), 1.66 – 1.54 (m, 5H).

**<sup>13</sup>C NMR** (126 MHz, CDCl<sub>3</sub>) δ = 133.02, 122.82, 49.77, 43.00, 42.87, 30.31, 26.92, 25.73, 25.07, 17.79.

**HRMS** (ESI) exact mass calculated for [M] (C<sub>10</sub>H<sub>20</sub>NO<sub>2</sub>SCl) from [M+H]<sup>+</sup> requires *m/z* 253.09033, found *m/z* 253.08983, difference 1.96 ppm.

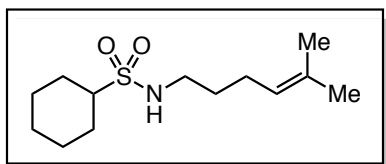

N-(5-methylhex-4-en-1-yl)cyclohexanesulfonamide

The title sulfonamide was synthesized following the general procedure found above. The title sulfonamide was purified by silica gel chromatography (gradient

from 0% to 15% EtOAc/hexane) to afford a colorless oil.

**IR** (Neat): 3286, 2931, 2857, 1450, 1312, 1141, 1082, 894 $\text{cm}^{-1}$ ;

**$^1\text{H}$  NMR** (500 MHz,  $\text{CDCl}_3$ )  $\delta$  = 5.16 – 5.00 (m, 1H), 4.25 (br, 1H), 3.10 (t,  $J$  = 6.7 Hz, 2H), 2.91 – 2.81 (m, 1H), 2.18 – 2.12 (m, 2H), 2.04 (q,  $J$  = 7.4 Hz, 2H), 1.93 – 1.86 (m, 2H), 1.64 – 1.56 (m, 5H), 1.56 – 1.44 (m, 2H), 1.33 – 1.15 (m, 3H).

**$^{13}\text{C}$  NMR** (126 MHz,  $\text{CDCl}_3$ )  $\delta$  = 132.76, 123.03, 61.16, 43.26, 30.70, 26.47, 25.72, 25.21, 25.16, 25.12, 17.76;

**HRMS** (ESI) exact mass calculated for  $[\text{M}]$  ( $\text{C}_{14}\text{H}_{21}\text{NO}_2\text{S}$ ) from  $[\text{M}+\text{H}]^+$  requires  $m/z$  259.16060, found  $m/z$  259.16056, difference 0.14 ppm.

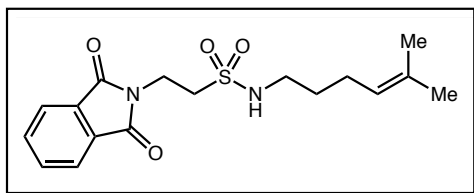

2-(1,3-dioxoisindolin-2-yl)-N-(5-methylhex-4-en-1-yl)ethane-1-sulfonamide

The title sulfonamide was synthesized following the general procedure found above. The title sulfonamide was purified by silica gel chromatography (gradient from 10% to 40% EtOAc/hexane) to afford a white solid.

**IR** (Neat): 3296, 2930, 1709, 1397, 1322, 1143, 1084, 867, 718 $\text{cm}^{-1}$ ;

**$^1\text{H}$  NMR** (500 MHz,  $\text{CDCl}_3$ )  $\delta$  7.88-7.84 (m, 2H), 7.76-7.72 (m, 2H), 5.09-5.05 (m, 1H), 4.78 (br, 1H), 4.13 (t,  $J$  = 6.0 Hz, 2H), 3.38 (t,  $J$  = 6.5 Hz, 2H), 3.13 (q,  $J$  = 6.5 Hz, 2H), 2.09-2.04 (m, 2H), 1.69-1.60 (m, 8H);

**$^{13}\text{C}$  NMR** (126 MHz,  $\text{CDCl}_3$ )  $\delta$  = 168.10, 134.32, 132.98, 131.81, 123.63, 122.81, 49.02, 42.96, 32.85, 30.39, 25.74, 25.06, 17.79;

**HRMS** (ESI) exact mass calculated for  $[\text{M}]$  ( $\text{C}_{17}\text{H}_{21}\text{N}_2\text{O}_4\text{S}$ ) from  $[\text{M}+\text{H}]^+$  requires  $m/z$  350.13003, found  $m/z$  350.12988, difference 0.42 ppm.

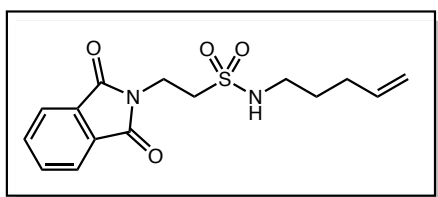

2-(1,3-dioxoisindolin-2-yl)-N-(pent-4-en-1-yl)ethane-1-sulfonamide

The title sulfonamide was synthesized following the general procedure found above. The title sulfonamide was purified by silica gel chromatography (gradient from 10% to 40% EtOAc/hexane) to afford a colorless liquid.

**IR** (Neat): 3298, 2939, 1710, 1397, 1323, 1144, 1085, 718 $\text{cm}^{-1}$ ;

**$^1\text{H}$  NMR** (500 MHz,  $\text{CDCl}_3$ )  $\delta$  = 7.89 – 7.84 (m, 2H), 7.77 – 7.71 (m, 2H), 5.85 – 5.70 (m, 1H), 5.10 – 4.98 (m, 2H), 4.86 (s, 1H), 4.16 – 4.08 (m, 2H), 3.41 – 3.35 (m, 2H), 3.19 – 3.12 (m, 2H), 2.22 – 2.10 (m, 2H), 1.74 – 1.65 (m, 2H).

**$^{13}\text{C}$  NMR** (126 MHz,  $\text{CDCl}_3$ )  $\delta$  = 168.13, 137.10, 134.35, 131.80, 123.65, 115.83, 49.03, 42.68, 32.85, 30.65, 29.41

**HRMS** (ESI) exact mass calculated for  $[\text{M}]$  ( $\text{C}_{15}\text{H}_{18}\text{N}_2\text{O}_4\text{S}$ ) from  $[\text{M}+\text{H}]^+$  requires  $m/z$  322.09873, found  $m/z$  322.09805, difference 2.1 ppm.

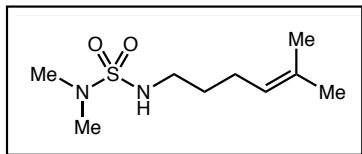

*N'*-(5-methylhex-4-en-1-yl)-*N,N*-dimethylsulfonamide

The title sulfonamide was synthesized following the general procedure found above. The title sulfonamide was purified by silica gel chromatography (gradient from 0% to 20% EtOAc/hexane) to afford a light-yellow liquid.

**IR** (Neat): 3297, 2929, 1447, 1323, 1146, 952, 703 $\text{cm}^{-1}$ ;

**$^1\text{H}$  NMR** (500 MHz,  $\text{CDCl}_3$ )  $\delta$  5.11 – 5.06 (m, 1H), 4.30 (br, 1H), 3.05 (q,  $J = 7.0$  Hz, 2H), 2.80 (s, 3H), 2.04 (q,  $J = 7.0$  Hz, 2H), 1.69 (s, 3H), 1.61-1.56 (m, 5H);

**$^{13}\text{C}$  NMR** (126 MHz,  $\text{CDCl}_3$ )  $\delta = 132.74, 123.07, 43.34, 38.05, 29.91, 25.72, 25.19, 17.75$ ;

**HRMS** (ESI) exact mass calculated for [M] ( $\text{C}_9\text{H}_{20}\text{N}_2\text{O}_2\text{S}$ ) from  $[\text{M}+\text{H}]^+$  requires  $m/z$  220.12455, found  $m/z$  220.12490, difference 1.60 ppm.

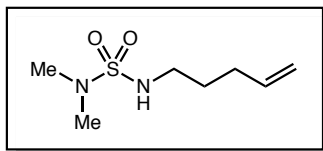

*N'*-(4-hexen-1-yl)-*N,N*-dimethylsulfonamide

The title sulfonamide was synthesized following the general procedure found above. The title sulfonamide was purified by silica gel chromatography (gradient from 0% to 25% EtOAc/hexane) to afford a colorless liquid.

**IR** (Neat): 3302, 2934, 1457, 1324, 1147, 953, 704 $\text{cm}^{-1}$ ;

**$^1\text{H}$  NMR** (500 MHz,  $\text{CDCl}_3$ )  $\delta = 5.87 - 5.72$  (m, 1H), 5.12 – 4.95 (m, 2H), 4.05 (s, 1H), 3.14 – 3.01 (m, 2H), 2.81 (s, 6H), 2.16 – 2.10 (m, 2H), 1.70 – 1.62 (m, 2H);

**$^{13}\text{C}$  NMR** (126 MHz,  $\text{CDCl}_3$ )  $\delta = 137.31, 115.67, 43.14, 38.07, 30.83, 28.99$ ;

**HRMS** (ESI) exact mass calculated for [M] ( $\text{C}_7\text{H}_{17}\text{N}_2\text{O}_2\text{S}$ ) from  $[\text{M}+\text{H}]^+$  requires  $m/z$  192.09325, found  $m/z$  192.09313, difference 0.63 ppm.

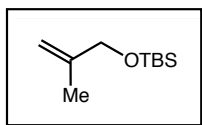

*tert*-butyl dimethyl((2-methylallyl)oxy)silane

The title compound was synthesized according to a published procedure<sup>11</sup>.

**$^1\text{H}$  NMR** (500 MHz,  $\text{CDCl}_3$ )  $\delta$  4.98 (s, 1H), 4.80 (s, 1H), 4.03 (s, 2H), 1.70 (s, 3H), 0.92 (s, 9H), 0.07 (s, 6H);

**$^{13}\text{C}$  NMR** (126 MHz,  $\text{CDCl}_3$ )  $\delta = 145.03, 109.54, 67.20, 26.32, 19.36, 18.81, -4.97$ ;

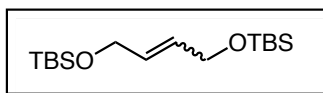

2,2,3,3,10,10,11,11-octamethyl-4,9-dioxa-3,10-disiladodec-6-ene

The title compound was synthesized according to a published procedure<sup>12</sup>. Used as a mixture of 3:1 of E:Z ratio.

**$^1\text{H}$  NMR** (500 MHz,  $\text{CDCl}_3$ )  $\delta = 5.61-5.52$  (m, 1.5 H), 5.12-5.21 (m, 0.5 H), 4.15-4.25 (m, 1H), 3.52-3.65 (m, 3H), 0.89 (s, 4.5 H), 0.81 (s, 13.5 H), 0.07 (3 H), 0.01 (s, 9H)

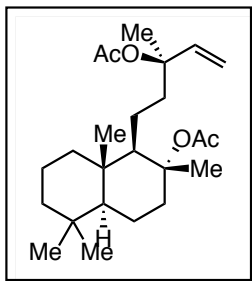

(R)-5-((1R,2R,4aS,8aS)-2-acetoxy-2,5,5,8a-tetramethyldecahydronaphthalen-1-yl)-3-methylpent-1-en-3-yl acetate

The title compound was synthesized according to a published procedure<sup>13</sup> with minor alteration. The solution of (-)-Sclareol (3.00 g, 10 mmol) and *N,N*-dimethylaniline (5 mL) in CH<sub>2</sub>Cl<sub>2</sub> (10 mL) was added acetyl chloride (4.2 mL, 60 mmol) at 0 °C. The resulting mixture was slowly warmed to room temperature and stirred overnight. The product was then extracted with diethyl ether three times. The combined organic phase was washed with 1.0 M HCl twice followed by a brine wash. The organic phase was then dried over Na<sub>2</sub>SO<sub>4</sub> and filtered. Evaporation of the organic solvent gave a crude product, which was purified on silica gel to give a white solid (3.52 g, 90%). All characterization data are consistent with reported data.

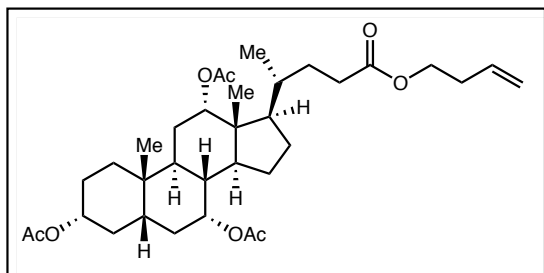

(3R,5S,7R,8R,9S,10S,12S,13R,14S,17R)-17-((R)-5-(but-3-en-1-yloxy)-5-oxopentan-2-yl)-10,13-dimethylhexadecahydro-1H-cyclopenta[a]phenanthrene-3,7,12-triyl triacetate

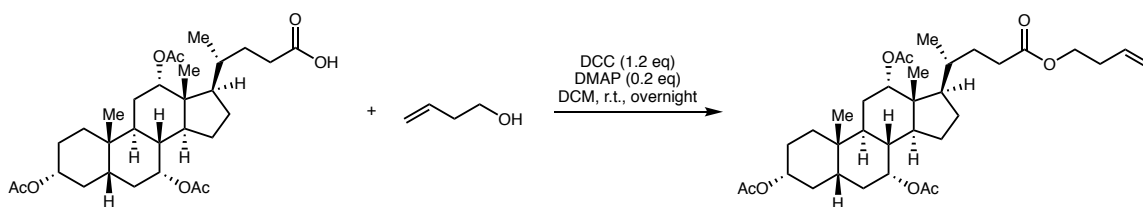

To a round bottle flask charged with a stir bar, (R)-4-((3R,5S,7R,8R,9S,10S,12S,13R,14S,17R)-3,7,12-triacetoxy-10,13-dimethylhexadecahydro-1H-cyclopenta[a]phenanthren-17-yl)pentanoic acid (5.0 mmol, 2.74 g),<sup>15</sup> DCM (25 mL), 3-buten-1-ol (6.0 mmol, 0.433 g), and DMAP (1.0 mmol, 0.122 g) were added in sequence. The flask was cooled in an ice-bath, and DCC (6.0 mmol, 1.24 g) was added. The reaction was warmed to room temperature and stirred overnight. The reaction was quenched by 1M HCl (aq) (50 mL) and filtered through celite. The water phase was extracted with 50 mL DCM three times. The combined organic phase was dried over anhydrous Na<sub>2</sub>SO<sub>4</sub>. The solvent was removed under vacuum and the product was purified by silica gel chromatography (gradient from 10% to 35% EtOAc/hexane) to afford a white solid (1.2 g, 40%).

**IR** (Neat): 2944, 1731, 1377, 1239, 1023, 731 cm<sup>-1</sup>;

**<sup>1</sup>H NMR** (500 MHz, CDCl<sub>3</sub>) δ = 5.82-5.74 (m, 1H), 5.13-5.06 (m, 3H), 4.91 (d, *J* = 3.5 Hz, 1H), 4.61-4.54 (m, 1H), 4.12 (t, *J* = 6.5 Hz, 2H), 2.40-2.31 (m, 3H), 2.23-2.17 (m, 1H), 2.14 (s, 3H), 2.09 (s, 3H), 2.05-2.01 (m, 5H), 1.98-1.22 (m, 20H), 0.92 (s, 3H), 0.81 (d, *J* = 6.5 Hz, 3H), 0.73 (s, 3H);

**<sup>13</sup>C NMR** (126 MHz, CDCl<sub>3</sub>) δ = 174.07, 170.54, 170.39, 134.03, 117.20, 75.40, 74.10, 70.70, 63.36, 47.42, 45.06, 43.40, 40.94, 37.74, 34.70, 34.62, 34.59, 34.34, 33.09, 31.25, 31.12, 30.79, 28.90, 27.19, 26.90, 25.59, 22.81, 22.58, 21.65, 21.52, 21.47, 17.50, 12.25;  
**HRMS** (ESI) exact mass calculated for [M] (C<sub>34</sub>H<sub>52</sub>O<sub>8</sub>) from [M+Na]<sup>+</sup> requires m/z 588.36622, found m/z 588.36500, difference 2.07 ppm.

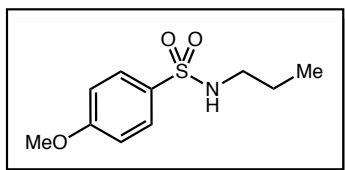

4-methoxy-N-propylbenzenesulfonamide

The title sulfonamide was synthesized following the general procedure found above. The title sulfonamide was purified by silica gel chromatography (gradient from 0% to 25% EtOAc/hexane) to afford a white solid.

**IR** (Neat): 3282, 2967, 1597, 1498, 1322, 1259, 1153, 1095, 834 cm<sup>-1</sup>;  
**<sup>1</sup>H NMR** (500 MHz, CDCl<sub>3</sub>) δ 7.82-7.78 (m, 2H), 7.00-6.96 (m, 2H), 4.57 (br, 1H), 3.87 (s, 3H), 2.89 (t, *J* = 7.5 Hz, 2H), 1.52-1.45 (m, 2H), 0.87 (t, *J* = 7.5 Hz, 3H);  
**<sup>13</sup>C NMR** (126 MHz, CDCl<sub>3</sub>) δ = 162.80, 131.58, 129.20, 114.21, 55.62, 44.93, 22.90, 11.15;  
**HRMS** (ESI) exact mass calculated for [M] (C<sub>10</sub>H<sub>15</sub>NO<sub>3</sub>S) from [M+H]<sup>+</sup> requires m/z 229.07726, found m/z 229.07689, difference 1.64 ppm.

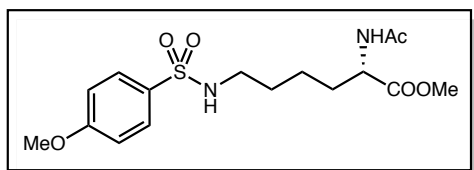

methyl N2-acetyl-N6-tosyl-L-lysinate

The title sulfonamide was synthesized following the general procedure found above. The title sulfonamide was purified by silica gel chromatography (gradient from 20% EtOAc/hexane to 70% EtOAc/hexane) to afford a light-yellow liquid.

**IR** (Neat): 3281, 2949, 1739, 1656, 1597, 1498, 1301, 1258, 1150, 1095, 1024, 835 cm<sup>-1</sup>;  
**<sup>1</sup>H NMR** (500 MHz, CDCl<sub>3</sub>) δ 7.80-7.77 (m, 2H), 7.00-6.97 (m, 2H), 6.26 (br, 1H), 4.93 (br, 1H), 4.58-4.54 (m, 1H), 3.88 (s, 3H), 3.74 (s, 3H), 2.93-2.87 (m, 2H), 2.03 (s, 3H), 1.82-1.75 (m, 1H), 1.67-1.60 (m, 1H), 1.56-1.45 (m, 2H), 1.40-1.31 (m, 2H);  
**<sup>13</sup>C NMR** (126 MHz, CDCl<sub>3</sub>) δ = 172.99, 170.21, 162.82, 131.46, 129.13, 114.25, 55.63, 52.47, 51.81, 42.58, 31.82, 28.78, 23.16, 22.03;  
**LC-MS** (ESI) exact mass calculated for [M] (C<sub>16</sub>H<sub>24</sub>N<sub>2</sub>O<sub>6</sub>S) from [M+H]<sup>+</sup> requires m/z 372.1, found m/z 372.1.

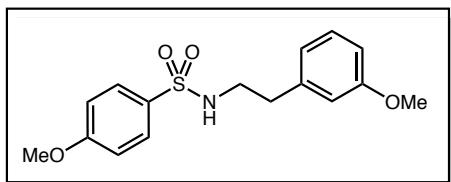

4-methoxy-N-(3-methoxyphenethyl)benzenesulfonamide

The title sulfonamide was synthesized following the general procedure found above. The title sulfonamide was purified by silica gel chromatography (gradient from 0% to 25% EtOAc/hexane) to afford a light-yellow liquid.

**IR** (Neat): 3279, 2943, 1596, 1497, 1322, 1257, 1150, 1095, 834  $\text{cm}^{-1}$ ;  
 **$^1\text{H}$  NMR** (500 MHz,  $\text{CDCl}_3$ )  $\delta$  7.75-7.72 (m, 2H), 7.18 (t,  $J = 7.8$  Hz, 1H), 6.97-6.93 (m, 2H), 6.77-6.74 (m, 1H), 6.68-6.65 (m, 1H), 6.61-6.60 (m, 1H), 4.49 (t,  $J = 7.5$  Hz, 1H), 3.87 (s, 3H), 3.76 (s, 3H), 3.19 (q,  $J = 7.0$  Hz, 2H), 2.73 (t,  $J = 7.0$  Hz, 2H);  
 **$^{13}\text{C}$  NMR** (126 MHz,  $\text{CDCl}_3$ )  $\delta = 162.84, 159.84, 139.27, 131.37, 129.76, 129.20, 121.00, 114.41, 114.23, 112.12, 55.62, 55.15, 44.08, 35.74$ ;  
**HRMS** (ESI) exact mass calculated for  $[\text{M}]$  ( $\text{C}_{16}\text{H}_{19}\text{NO}_4\text{S}$ ) from  $[\text{M}+\text{H}]^+$  requires  $m/z$  321.10348, found  $m/z$  321.10333, difference 0.47 ppm.

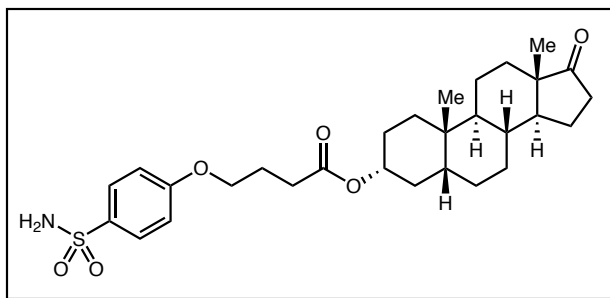

(3R,5R,8R,9S,10S,13S,14S)-10,13-dimethyl-17-oxohexadecahydro-1H-cyclopenta[a]phenanthren-3-yl 4-(4-sulfamoylphenoxy)butanoate

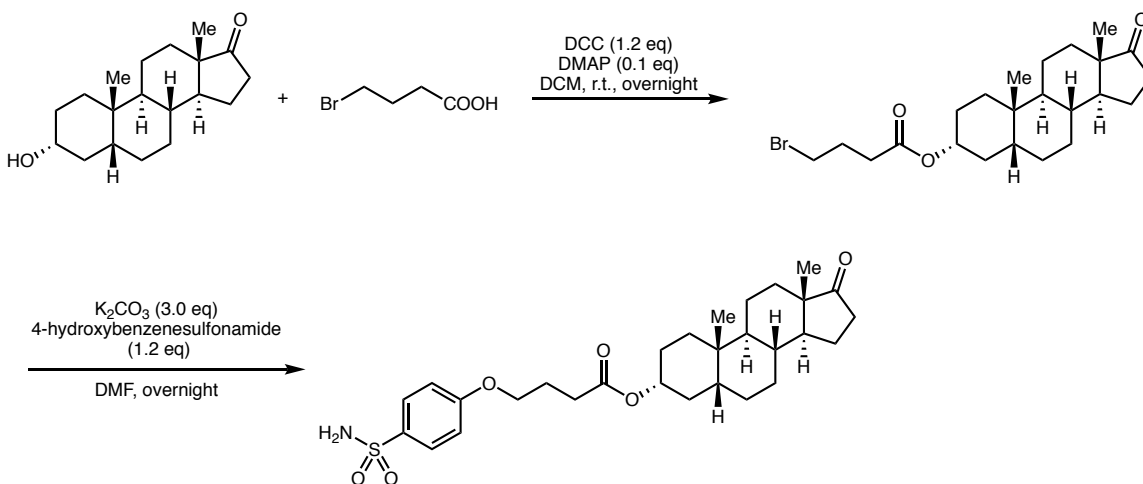

To a round bottle flask charged with a stir bar, (3R,5R,8R,9S,10S,13S,14S)-3-hydroxy-10,13-dimethylhexadecahydro-17H-cyclopenta[a]phenanthren-17-one (10.0 mmol, 2.76 g), DCM (50 mL), 4-bromobutanoic acid (12.0 mmol, 2.00 g) and DMAP (1.0 mmol, 0.122 g) were added in sequence. The flask was cooled in an ice-bath, and DCC (12.0 mmol, 2.48 g) was added. The reaction was warmed to room temperature and stirred overnight. The reaction was quenched with 1M HCl (aq.) (50 mL) and filtered through celite. The aqueous phase was extracted with 50 mL DCM three times. The combined organic phase was dried over anhydrous  $\text{Na}_2\text{SO}_4$ . The solvent was removed under vacuum and the crude product was carried on without further purification.

To a flame-dried round bottle flask charged with a stir bar, 4-hydroxybenzenesulfonamide (12 mmol, 2.08 g) and dry DMF (40 mL) were added in sequence. After the reaction was cooled in an ice-bath,  $\text{K}_2\text{CO}_3$  (30 mmol, 4.14 g) was



added in small portions and the reaction was stirred for 30 min at 0°C. Then the solution of crude (3*R*,5*R*,8*R*,9*S*,10*S*,13*S*,14*S*)-10,13-dimethyl-17-oxohexadecahydro-1*H*-cyclopenta[*a*]phenanthren-3-yl 4-bromobutanoate in 10 mL of DMF was added slowly, using another 2 mL of DMF to transfer completely. The reaction was warmed gradually to room temperature and stirred over night. The reaction was quenched by adding 250 mL of water and extract by 50 mL ether four times. The combined organic phase was washed with brine three times and dried over anhydrous Na<sub>2</sub>SO<sub>4</sub>. The solvent was removed under vacuum to afford the crude product, which was further purified by silica gel chromatography (gradient from 0 to 50% EtOAc/hexane) to afford a white solid (1.8 g, 34% yield over two steps).

**IR** (Neat): 3259, 2936, 1727, 1597, 1335, 1255, 1158, 833, 731 cm<sup>-1</sup>;

**<sup>1</sup>H NMR** (500 MHz, CDCl<sub>3</sub>) δ = 7.87-7.84 (m, 2H), 6.97-6.94 (m, 2H), 4.84 (br, 2H), 4.75-4.69 (m, 1H), 4.07 (t, *J* = 6.0 Hz, 2H), 2.50-2.41 (m, 3H), 2.15-2.03 (m, 3H), 1.96-1.90 (m, 1H), 1.83-1.73 (m, 4H), 1.68-1.45 (m, 5H), 1.41-1.17 (m, 7H), 1.07-0.94 (m, 2H), 0.86 (s, 3H), 0.85 (s, 3H), 0.74-0.69 (m, 1H);

**<sup>13</sup>C NMR** (126 MHz, CDCl<sub>3</sub>) δ = 221.36, 172.50, 162.22, 133.67, 128.62, 114.69, 73.76, 67.24, 54.28, 51.35, 47.80, 44.64, 36.68, 35.86, 35.65, 35.02, 33.98, 31.51, 30.93, 30.80, 28.27, 27.44, 24.44, 21.78, 20.47, 13.83, 12.23;

**HRMS** (ESI) exact mass calculated for [M] (C<sub>29</sub>H<sub>41</sub>NO<sub>6</sub>S) from [M+Na]<sup>+</sup> requires m/z 531.26546, found m/z 531.26509, difference 0.29 ppm.

### III. Synthesis and Characterization of Photocatalyst

#### Synthesis of ligand

##### 2-(2,4-difluorophenyl)-4-(trifluoromethyl)pyridine

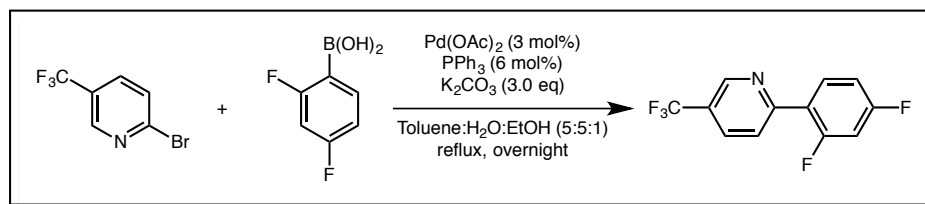

To a flame-dried 250 three-neck round bottom flask charged with a magnetic stir bar was added 2-bromo-5-(trifluoromethyl)pyridine (6.78 g, 30 mmol, 1.0 eq), (2,4-difluorophenyl)boronic acid (5.68 g, 36 mmol, 1.2 eq), Pd(OAc)<sub>2</sub> (202 mg, 0.90 mmol, 3 mol %), PPh<sub>3</sub> (472 mg, 1.80 mmol, 6 mol %), and K<sub>2</sub>CO<sub>3</sub> (12.44 g, 90 mmol, 3.0 eq). The flask was evacuated and backfilled with Ar three times. Toluene (40 mL), water (40 mL) and Ethanol (8.0 mL) were added and reaction was heated to reflux under severe stirring overnight. The reaction was cooled to room temperature and 100 mL water was added to quench the reaction. The organic phase was separated and saved while the aqueous phase was extracted with 40 mL of ether three times. The combined organic phase was washed with brine three times. The organic phase was collect and dried over Na<sub>2</sub>SO<sub>4</sub> and the solvent was removed under vacuum. The crude product was purified by silica gel flash chromatography (gradient from 0% to 12% EtOAc/hexane) to afford a light-yellow solid in 86% yield. Characterization data are consistent with a prior report.<sup>16</sup>

##### 5,5'-bis(trifluoromethyl)-2,2'-bipyridine

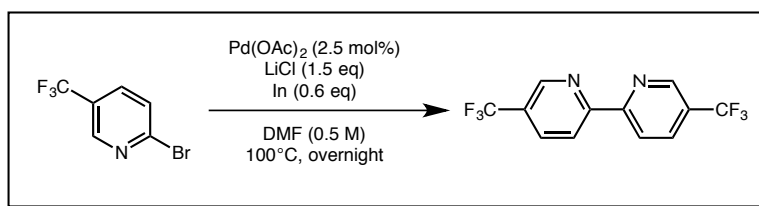

The title compound was synthesized according to a prior report with which all characterization data are consistent.<sup>17</sup> In an oven-dried 250-mL round-bottomed flask, 2-bromo-5-(trifluoromethyl)pyridine (30.0 mmol, 6.78 g), Pd(OAc)<sub>2</sub> (2.5 mol%, 168 mg, 0.75 mmol), and indium powder (0.6 eq., 2.07 g, 18.0 mmol) were added under normal atmosphere. Next, this was followed by addition of LiCl (1.5 eq., 1.91 g, 45 mmol) in a glove box. DMF (60 mL) was added under argon, and the reaction was heated at 100°C overnight. After completion, the reaction was cooled to room temperature. 180 mL of water and 60 mL of ether were added and the mixture was filtered through a celite pad with three rinses using 40 mL ether. The filtrate was transferred to a separatory funnel and the aqueous layer was extracted with 40 mL ether three times. The organic layers were combined and washed with 50 mL brine three times and dried over Na<sub>2</sub>SO<sub>4</sub>. The

solvent was removed and the crude product was purified by silica flash chromatography to afford the product as a white solid (1.5 g, 34% yield).

### Synthesize $[\text{Ir}(\text{dF-CF}_3\text{-ppy})_2\text{Cl}]_2\text{-dimer}$

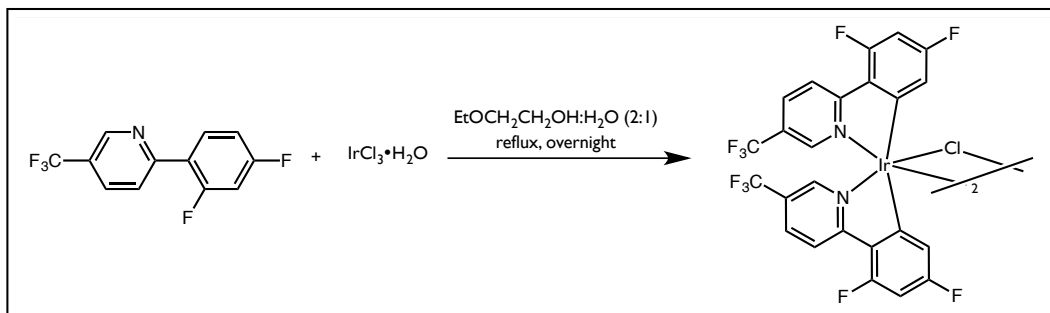

To a flame-dried 250 mL three necked round bottom flask with reflux condenser a magnetic stir bar was added  $\text{IrCl}_3 \cdot \text{H}_2\text{O}$  (1.90 g, 6.0 mmol, 1.0 eq.) and 2-(2,4-difluorophenyl)-4-(trifluoromethyl)pyridine (3.19 g, 12.3 mmol, 2.05 eq.). The flask was evacuated and backfilled with Ar three times. 2-ethoxyethanol (80 mL) and water (40 mL) were added and degassed for half an hour. The reaction was heated to 135 °C and the reaction was stirred overnight. Upon completion, the reaction was cooled to room temperature and precipitation was observed. The precipitate was filtered and washed with 100 mL water three times. The powder was dried under air flow and carried on without further purification (3.60 g, 81% yield).

### Synthesize cationic $[\text{Ir}(\text{dF-CF}_3\text{-ppy})_2(\text{NCMe})_2]^+ \text{PF}_6^-$

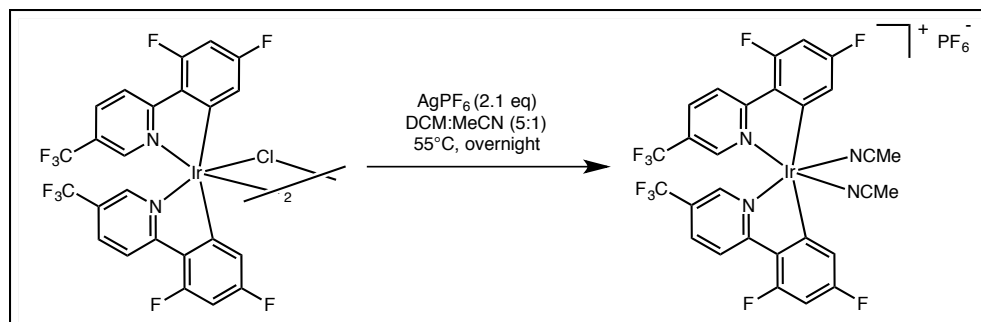

To a 250mL three-necked round bottom flask charged with stir bar and fitted with a condenser,  $[\text{Ir}(\text{dF-CF}_3\text{-ppy})_2\text{Cl}]_2\text{-dimer}$  (3.60 g, 2.42 mmol, 1.0 eq) and  $\text{AgPF}_6$  (super hygroscopic, handle in a glove box or weight very fast in air, 1.25 g, 4.96 mmol, 2.05 eq) were added. The reaction vessel was placed under vacuum and refilled with Argon three times. Dry dichloromethane (60 mL) and acetonitrile (20 mL) were added to the reaction, which was heated to reflux overnight in a 55 °C oil bath. Upon completion, the reaction was cooled to room temperature. The reaction was filtered through a celite pad to remove the  $\text{AgCl}$  precipitate. The solution was concentrated to give a yellow solid, which was then partially dissolved in 20 mL warm 1:1 DCM:acetone. The mixture was allowed to

cool at which point pentane was added to afford a light yellow precipitate which was obtained via filtration and used without further purification (4.29 g, quant.).

### Synthesize $[\text{Ir}(\text{dF-CF}_3\text{-ppy})_2(\text{d}(\text{CF}_3)\text{-bpy})_2]^+\text{PF}_6^-$

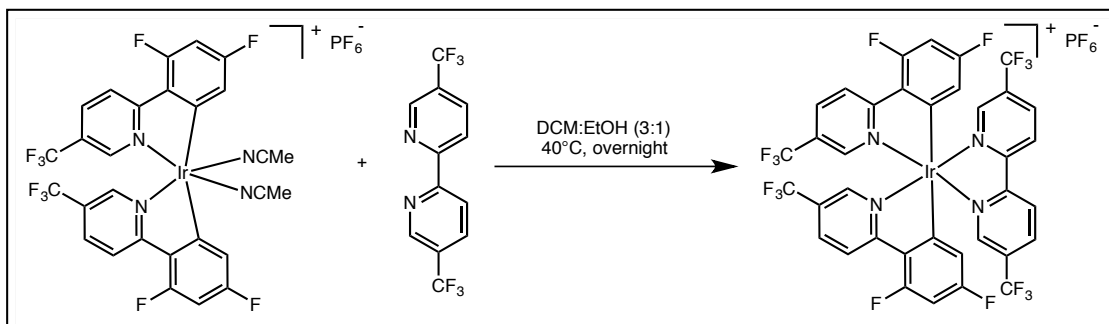

In a 100 mL three-necked round bottom flask charged with stir bar and affixed with a condenser,  $[\text{Ir}(\text{dF-CF}_3\text{-ppy})_2(\text{NCMe})_2]\text{PF}_6$  (4.29 g, 5.03 mmol, 1 eq) and 5,5'-bis(trifluoromethyl)-2,2'-bipyridine (1.62 g, 5.53 mmol, 1.1 eq) were added, followed by dichloromethane (60 mL) and ethanol (20 mL). The reaction was heated to 40 °C and stirred overnight. Upon completion, the reaction was cooled to room temperature and the reaction was filtered through celite using acetone to wash away the iridium complex from the solid. The filtrate was then concentrated under vacuum and the crude product was purified by silica gel flash chromatography gradient with 0 to 25% Acetone/DCM to afford a yellow solid. The product was recrystallized from acetone and pentane to afford a yellow crystal as the pure photocatalyst (5.76 g, 64% yield).

**$^1\text{H}$  NMR** (500 MHz,  $\text{d}_6$ -Acetone)  $\delta$  = 9.29 (d,  $J$  = 8 Hz, 1H), 8.83 (d,  $J$  = 8.5 Hz, 1H), 8.61 (dd,  $J^1$  = 9 Hz,  $J^2$  = 2.5 Hz, 1H), 8.55 (s, 1H), 8.41 (dd,  $J^1$  = 8.5 Hz,  $J^2$  = 2 Hz, 1H), 8.19 (s, 1H), 6.91 (t,  $J$  = 11 Hz, 1H), 5.98 (dd,  $J^1$  = 8.5 Hz,  $J^2$  = 2.5 Hz, 1H).

**$^{13}\text{C}$  NMR** (126 MHz,  $\text{d}_6$ -Acetone)  $\delta$  = 168.20 (d,  $J$  = 6.6 Hz), 166.19 (d,  $J$  = 12.6 Hz), 164.14 (d,  $J$  = 12.6 Hz), 162.10 (d,  $J$  = 13.4 Hz), 159.27, 153.58 (d,  $J$  = 7.1 Hz), 149.65, 148.21 (q,  $J$  = 4.7 Hz), 139.31 (d,  $J$  = 3.4 Hz), 138.50 (d,  $J$  = 3.4 Hz), 131.58 (q,  $J$  = 34.8 Hz), 128.01, 126.37 (q,  $J$  = 34.3 Hz), 124.92 (d,  $J$  = 21.0 Hz), 124.04, 121.86, 115.91 (d,  $J$  = 18.1 Hz), 100.69 (t,  $J$  = 27.1 Hz).

**$^{19}\text{F}$  NMR** (282 MHz,  $\text{d}_6$ -Acetone)  $\delta$  = -63.57 (d,  $J$  = 107.2 Hz, 12F), -72.58 (d,  $J$  = 705 Hz, 6F), -104.47 (m, 2F), -107.88 (t,  $J$  = 14.1 Hz, 2F).

**$^{31}\text{P}$  NMR** (121 MHz,  $\text{d}_6$ -Acetone)  $\delta$  = -144.25 (hept,  $J$  = 704.2 Hz).

**HRMS (ESI)** exact mass calculated for  $[\text{Ir}(\text{dF-CF}_3\text{-ppy})_2(\text{d}(\text{CF}_3)\text{-bpy})_2]^+$  ( $\text{C}_{36}\text{H}_{16}\text{F}_{16}\text{IrN}_4$ ) requires  $m/z$  1001.07432, found  $m/z$  1001.07398, difference 0.66 ppm.

## IV. Synthesis and Characterization of Phosphate and TRIP Thiol

### Synthesis of phosphate:

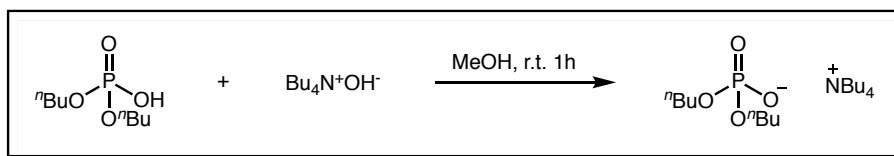

In a 100 mL flame-dried round bottom flask charged with a stir bar, dibutyl phosphoric acid (1.0 eq, 20 mmol, 4.20 g) was added, followed by the addition of 10 mL dry MeOH. The reaction was cooled to 0°C in an ice bath and 20 mL 1M tetrabutylammonium hydroxide methanol solution was added slowly. After addition, the reaction was warmed to room temperature and was stirred for an hour. After the reaction was completed, solvent was removed under vacuum. The reaction mixture was kept under vacuum and heat up in a 60°C oil bath for three days with constant agitation to remove the rest of water as much as possible. After the product forms a white solid, the flask was stored in a glove box under nitrogen (yield: 98%).

**<sup>1</sup>H NMR** (500 MHz, CDCl<sub>3</sub>) δ = 3.85-3.80 (m, 4.2H), 3.42-3.35 (m, 8H), 1.70-1.60 (m, 12.4H), 1.49-1.35 (m, 12.4 H), 0.99 (t, *J* = 7.4 Hz, 12H), 0.89 (t, *J* = 7.4 Hz, 6.5H).

**<sup>13</sup>C NMR** (126 MHz, CDCl<sub>3</sub>) δ = 64.58, 58.85, 33.15, 24.19, 19.79, 19.17, 13.96, 13.73.

**<sup>31</sup>P NMR** (121 MHz, CDCl<sub>3</sub>) δ = 0.75 (s)

### Synthesis of 2,4,6-triisopropylbenzene thiol:

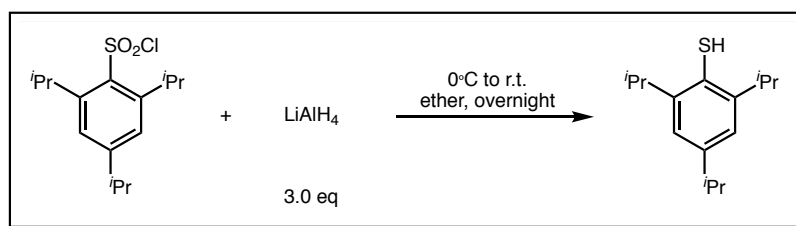

Synthesis of TRIP thiol is following a published procedure and the characterization data is consistent.<sup>18</sup> To a dry 100-mL round bottom flask, lithium aluminum hydride (LiAlH<sub>4</sub>) (1.52 g, 40.0 mmol) was added. Dry Et<sub>2</sub>O (13 mL) was then added to form a suspension and it was cooled to 0 °C. To this mixture, a solution of 2,4,6-triisopropylbenzene-1-sulfonyl chloride (6.06 g, 20 mmol) in Et<sub>2</sub>O (20 ml) was added slowly. After completion of addition, an additional load of LiAlH<sub>4</sub> (760 mg, 20 mmol) was added. The reaction was allowed to warm to room temperature as it was stirred overnight. Upon completion, the reaction is cooled to 0°C and dilute with 40 mL Et<sub>2</sub>O. The reaction was quenched with water (1 mL per gram of LiAlH<sub>4</sub>), 15% w:w NaOH solution (1 mL per gram of LiAlH<sub>4</sub>) and water (3 mL per gram of LiAlH<sub>4</sub>). The reaction was stirred for 10 min at 0 °C before MgSO<sub>4</sub> was added. The resulting white slurry was allowed to stir for 30min at room temperature. The white solids were then removed via filtration, with Et<sub>2</sub>O rinsing.

The solution was then concentrated and the product was distilled (95–105°C) at reduced pressure (0.5 torr) to provide 4.08 g (17 mmol, 86 % yield) of the title compound. Notably, it is critical to keep the reaction temperature as low as possible when adding the substrate and reagents and during the quenching process. Warming may result in reductive desulfurization, forming a mixture of the desired compound and 1,3,5-triisopropylbenzene that is difficult to separate.

**<sup>1</sup>H NMR** (500 MHz, CDCl<sub>3</sub>) δ =7.02 (s, 2H), 3.60 – 3.46 (m, 2H), 3.09 (s, 1H), 2.95 – 2.82 (m, 1H), 1.33 – 1.24 (m, 18H).

## V. Characterization of Products

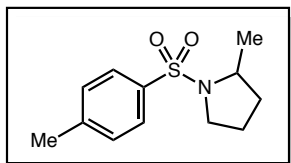

### 2-methyl-1-tosylpyrrolidine

The reaction was set up following general procedure B with 4-methyl-*N*-(pent-4-en-1-yl)benzenesulfonamide (120 mg, 0.5 mmol) for 36 hours. Upon completion, the crude product was purified using silica column chromatography (gradient 100% hexanes to 15% EtOAc/hexanes) to give 103.3 mg (86% yield) of the title compound as a white solid.

**IR** (Neat): 2970, 1342, 1158, 1093, 817, 718, 662  $\text{cm}^{-1}$ ;

**$^1\text{H}$  NMR** (500 MHz,  $\text{CDCl}_3$ )  $\delta$  7.74-7.70 (m, 2H), 7.33-7.29 (m, 2H), 3.74-3.68 (m, 1H), 3.46-3.41 (m, 1H), 3.17-3.12 (m, 1H), 2.43 (s, 3H), 1.87-1.78 (m, 1H), 1.73-1.66 (m, 1H), 1.57-1.45 (m, 2H), 1.31 (d,  $J = 7.0$  Hz, 3H);

**$^{13}\text{C}$  NMR** (126 MHz,  $\text{CDCl}_3$ )  $\delta = 143.17, 134.85, 129.58, 127.45, 56.10, 49.08, 33.48, 23.91, 22.89, 21.52$ ;

**HRMS** (ESI) exact mass calculated for  $[\text{M}]$  ( $\text{C}_{12}\text{H}_{17}\text{NO}_2\text{S}$ ) from  $[\text{M}+\text{H}]^+$  requires  $m/z$  239.09800, found  $m/z$  239.09813, difference 0.55 ppm.

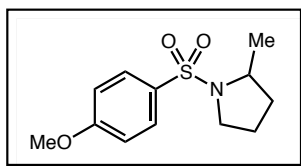

### 1-((4-methoxyphenyl)sulfonyl)-2-methylpyrrolidine

The reaction was set up following general procedure B with 4-methoxy-*N*-(5-methylhex-4-en-1-yl)benzenesulfonamide (128 mg, 0.5 mmol) for 36 hours. Upon completion, the crude product was purified using silica column chromatography (gradient 100% hexanes to 20% EtOAc/hexanes) to give 118.0 mg (92% yield) of the title compound as a white solid.

**IR** (Neat): 2969, 1596, 1497, 1341, 1333, 1258, 1153, 1093, 1024, 804, 666  $\text{cm}^{-1}$ ;

**$^1\text{H}$  NMR** (500 MHz,  $\text{CDCl}_3$ )  $\delta$  7.79-7.76 (m, 2H), 7.00-6.97 (m, 2H), 3.87 (s, 3H), 3.72-3.65 (m, 1H), 3.45-3.41 (m, 1H), 3.16-3.11 (m, 1H), 1.87-1.78 (m, 1H), 1.73-1.66 (m, 1H), 1.57-1.46 (m, 2H), 1.31 (d,  $J = 7.0$  Hz, 3H);

**$^{13}\text{C}$  NMR** (126 MHz,  $\text{CDCl}_3$ )  $\delta = 162.73, 129.61, 129.48, 114.10, 56.07, 55.58, 49.09, 33.49, 23.93, 22.89$ ;

**HRMS** (ESI) exact mass calculated for  $[\text{M}]$  ( $\text{C}_{12}\text{H}_{17}\text{NO}_3\text{S}$ ) from  $[\text{M}+\text{H}]^+$  requires  $m/z$  255.09291, found  $m/z$  255.09333, difference 1.65 ppm.

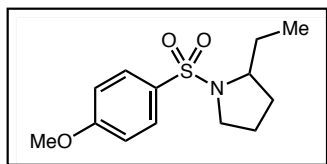

### 2-ethyl-1-((4-methoxyphenyl)sulfonyl)pyrrolidine

The reaction was set up following general procedure B with (*E*)-*N*-(hex-4-en-1-yl)-4-methoxybenzenesulfonamide (135 mg, 0.5 mmol) for 36 hours. Upon completion, the crude product was purified using silica column chromatography (gradient 100% hexanes to 20% EtOAc/hexanes) to give 123.3 mg (91% yield) of the title compound as a colorless oil.

**IR** (Neat): 2968, 1596, 1497, 1339, 1258, 1154, 1093, 668  $\text{cm}^{-1}$ ;

**$^1\text{H}$  NMR** (500 MHz,  $\text{CDCl}_3$ )  $\delta$  7.79-7.75 (m, 2H), 7.00-6.96 (m, 2H), 3.87 (s, 3H), 3.55-3.50 (m, 1H), 3.39-3.35 (m, 1H), 3.21-3.16 (m, 1H), 1.89-1.73 (m, 2H), 1.62-1.43 (m, 4H), 0.91 (t,  $J = 7.5$  Hz, 3H);

**$^{13}\text{C}$  NMR** (126 MHz,  $\text{CDCl}_3$ )  $\delta = 162.73, 129.72, 129.49, 114.10, 61.81, 55.58, 49.02, 30.15, 29.21, 24.13, 10.38$ ;

**HRMS** (ESI) exact mass calculated for  $[\text{M}]$  ( $\text{C}_{13}\text{H}_{19}\text{NO}_3\text{S}$ ) from  $[\text{M}+\text{H}]^+$  requires  $m/z$  269.10856, found  $m/z$  269.10896, difference 1.46 ppm.

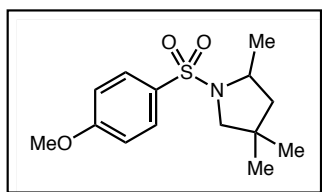

1-((4-methoxyphenyl)sulfonyl)-2,4,4-trimethylpyrrolidine

The reaction was set up following general procedure B with N-(2,2-dimethylpent-4-en-1-yl)-4-methoxybenzenesulfonamide (142 mg, 0.5 mmol) for 36 hours. Upon completion, the crude product was purified using silica column chromatography (gradient 100% hexanes to 20% EtOAc/hexanes) to give 128.3 mg (90% yield) of the title compound as a white solid.

**IR** (Neat): 2965, 1596, 1497, 1338, 1258, 1154, 1095, 1025, 804, 665  $\text{cm}^{-1}$ ;

**$^1\text{H}$  NMR** (500 MHz,  $\text{CDCl}_3$ )  $\delta$  7.80-7.76 (m, 2H), 7.00-6.96 (m, 2H), 3.87 (s, 3H), 3.46-3.42 (m, 1H), 3.17-3.11 (m, 2H), 1.71-1.66 (m, 1H), 1.36-1.31 (m, 1H), 1.22 (d,  $J = 7.0$  Hz, 3H), 0.91 (s, 3H), 0.53 (s, 3H);

**$^{13}\text{C}$  NMR** (126 MHz,  $\text{CDCl}_3$ )  $\delta = 162.71, 129.49, 129.40, 114.00, 64.85, 55.57, 46.41, 41.12, 37.17, 26.39, 22.59, 18.63$ ;

**HRMS** (ESI) exact mass calculated for  $[\text{M}]$  ( $\text{C}_{14}\text{H}_{21}\text{NO}_3\text{S}$ ) from  $[\text{M}+\text{H}]^+$  requires  $m/z$  283.12421, found  $m/z$  283.12389, difference 1.13 ppm.

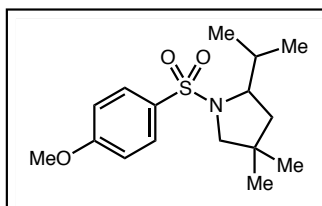

2-isopropyl-1-((4-methoxyphenyl)sulfonyl)-4,4-dimethylpyrrolidine

The reaction was set up following general procedure B with 4-methoxy-N-(2,2,5-trimethylhex-4-en-1-yl)benzenesulfonamide (156 mg, 0.5 mmol) for 36 hours. Upon completion, the crude product was purified using silica column chromatography (gradient 100% hexanes to 20% EtOAc/hexanes) to give 142.9 mg (92% yield) of the title compound as a colorless oil.

**IR** (Neat): 2960, 1597, 1497, 1337, 1258, 1153, 1094, 665  $\text{cm}^{-1}$ ;

**$^1\text{H}$  NMR** (500 MHz,  $\text{CDCl}_3$ )  $\delta$  7.79-7.75 (m, 2H), 6.99-6.95 (m, 2H), 3.86 (s, 3H), 3.68-3.64 (m, 1H), 3.26-3.23 (m, 1H), 3.04-3.00 (m, 1H), 2.55-2.48 (m, 1H), 1.53-1.41 (m, 2H), 1.00 (s, 3H), 0.85 (d,  $J = 7.0$  Hz, 3H), 0.81 (d,  $J = 7.0$  Hz, 3H), 0.50 (s, 3H);

**$^{13}\text{C}$  NMR** (126 MHz,  $\text{CDCl}_3$ )  $\delta = 162.62, 131.08, 129.25, 113.97, 64.84, 61.85, 55.57, 39.21, 37.10, 30.25, 26.17, 25.84, 19.31, 14.52$ ;

**HRMS** (ESI) exact mass calculated for  $[\text{M}]$  ( $\text{C}_{16}\text{H}_{25}\text{NO}_3\text{S}$ ) from  $[\text{M}+\text{H}]^+$  requires  $m/z$  311.15551, found  $m/z$  311.15524, difference 0.89 ppm.



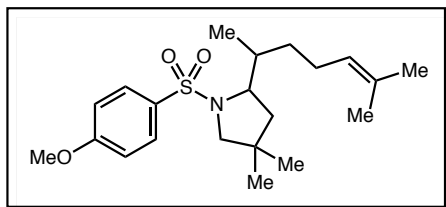

1-((4-methoxyphenyl)sulfonyl)-4,4-dimethyl-2-((6-methylhept-5-en-2-yl)pyrrolidine

The reaction was set up following general procedure B with (E)-4-methyl-N-(2,2,5,9-tetramethyldeca-4,8-dien-1-yl)benzenesulfonamide (190 mg, 0.5 mmol) for 36 hours. Upon completion, the crude product was purified using silica column chromatography (gradient 100% hexanes to 20% EtOAc/hexanes) to give 153.2 mg (81% yield) of the title compound as a colorless oil.

**IR** (Neat): 2959, 1197, 1497, 1338, 1258, 1153, 1094, 834, 666  $\text{cm}^{-1}$ ;

**$^1\text{H}$  NMR** (500 MHz,  $\text{CDCl}_3$ )  $\delta$  7.78-7.74 (m, 2H), 6.98-6.94 (m, 2H), 5.12-5.06 (m, 1H), 3.86 (s, 3H), 3.72-3.67 (m, 1H), 3.30 (d,  $J = 11.0$  Hz, 0.5H), 3.26-3.23 (m, 0.5H), 3.02-2.99 (m, 1H), 2.42-2.34 (m, 0.5H), 2.28-2.21 (m, 0.5H), 2.09-2.00 (m, 1H), 1.99-1.92 (m, 0.5H), 1.84-1.77 (0.5H), 1.71-1.67 (s, 3H), 1.62-1.59 (m, 3H), 1.54-1.48 (m, 2H), 1.43-1.39 (m, 0.5H), 1.22-1.09 (m, 4H), 0.85-0.81 (m, 3H), 0.53-0.49 (s, 3H);

**$^{13}\text{C}$  NMR** (126 MHz,  $\text{CDCl}_3$ )  $\delta = 162.59, 131.50, 131.15, 131.01, 129.27, 129.18, 124.92, 124.48, 113.96, 113.94, 109.91, 109.48, 65.16, 63.77, 61.96, 61.90, 55.56, 55.55, 40.20, 39.43, 37.15, 37.03, 35.54, 35.08, 34.30, 29.29, 26.25, 26.13, 26.07, 26.07, 25.80, 25.75, 25.73, 25.70, 17.72, 17.68, 16.67, 12.41$ ;

**HRMS** (ESI) exact mass calculated for  $[\text{M}]$  ( $\text{C}_{21}\text{H}_{33}\text{NO}_3\text{S}$ ) from  $[\text{M}+\text{H}]^+$  requires  $m/z$  379.21811, found  $m/z$  379.21827, difference 0.42 ppm.

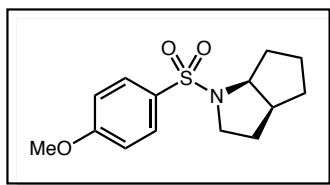

(±)-(3a*S*,6a*S*)-1-((4-methoxyphenyl)sulfonyl)octahydrocyclopenta[*b*]pyrrole

The reaction was set up following general procedure B with N-(2-(cyclopent-2-en-1-yl)ethyl)-4-methoxybenzenesulfonamide (141 mg, 0.5 mmol) for 36 hours. Upon completion, the crude product was purified using silica column chromatography (gradient 100% hexanes to 20% EtOAc/hexanes) to give 121.6 mg (85% yield) of the title compound as a colorless oil.

**IR** (Neat): 2949, 1596, 1497, 1341, 1258, 1154, 1093, 1023, 826, 804  $\text{cm}^{-1}$ ;

**$^1\text{H}$  NMR** (500 MHz,  $\text{CDCl}_3$ )  $\delta$  7.79-7.75 (m, 2H), 7.00-6.96 (m, 2H), 3.87 (s, 3H), 3.76-3.73 (m, 1H), 3.45-3.41 (m, 1H), 3.01-2.96 (m, 1H), 2.52-2.45 (m, 1H), 2.07-2.00 (m, 1H), 1.77-1.39 (m, 7H);

**$^{13}\text{C}$  NMR** (126 MHz,  $\text{CDCl}_3$ )  $\delta = 162.81, 129.79, 128.72, 114.06, 64.96, 55.60, 49.77, 43.37, 34.66, 31.98, 31.00, 24.47$ ;

**HRMS** (ESI) exact mass calculated for  $[\text{M}]$  ( $\text{C}_{14}\text{H}_{19}\text{NO}_3\text{S}$ ) from  $[\text{M}+\text{H}]^+$  requires  $m/z$  281.10856, found  $m/z$  281.10856, difference 0.03 ppm.

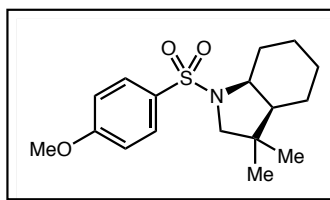

(±)-(3a*S*,7a*S*)-1-((4-methoxyphenyl)sulfonyl)-3,3-dimethyloctahydro-1*H*-indole

The reaction was set up following general procedure B with *N*-(2-(cyclohex-2-en-1-yl)-2-methylpropyl)-4-methoxybenzenesulfonamide (162 mg, 0.5 mmol) for 36 hours. Upon completion, the crude product was purified using silica column chromatography (gradient 100% hexanes to 20% EtOAc/hexanes) to give 144.2 mg (89% yield) of the major diastereomer as a colorless oil.

**IR** (Neat): 2932, 1596, 1497, 1258, 1154, 1093, 1024, 836, 804, 745, 670  $\text{cm}^{-1}$ ;  
 **$^1\text{H}$  NMR** (500 MHz,  $\text{CDCl}_3$ )  $\delta$  7.79-7.75 (m, 2H), 7.00-6.96 (m, 2H), 3.87 (s, 3H), 3.56-3.52 (m, 1H), 3.30 (d,  $J = 10.5$  Hz, 1H), 3.04 (d,  $J = 10.5$  Hz, 1H), 2.53-2.49 (m, 1H), 1.69-1.40 (m, 6H), 1.26-1.12 (m, 2H), 0.90 (s, 3H), 0.49 (s, 3H);  
 **$^{13}\text{C}$  NMR** (126 MHz,  $\text{CDCl}_3$ )  $\delta = 162.74, 129.55, 128.97, 113.96, 60.43, 58.88, 55.58, 47.80, 38.96, 28.90, 27.12, 24.70, 24.40, 21.89, 20.34$ ;  
**HRMS** (ESI) exact mass calculated for  $[\text{M}]$  ( $\text{C}_{17}\text{H}_{25}\text{NO}_3\text{S}$ ) from  $[\text{M}+\text{H}]^+$  requires  $m/z$  323.15551, found  $m/z$  323.15491, difference 1.87 ppm.

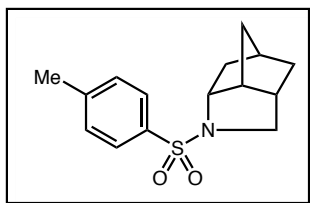

1-tosyloctahydro-3,5-methanocyclopenta[b]pyrrole

The reaction was set up following general procedure B with ( $\pm$ )-*N*-(((1*S*,2*S*,4*S*)-bicyclo[2.2.1]hept-5-en-2-yl)methyl)-4-methylbenzenesulfonamide (139 mg, 0.5 mmol) for 36 hours. Upon completion, the crude product was purified using silica column chromatography (gradient 100% hexanes to 15% EtOAc/hexanes) to give 119.3 mg (86% yield) of the title compound as a colorless oil.

**IR** (Neat): 2957, 1598, 1341, 1155, 1095, 816, 665  $\text{cm}^{-1}$ ;  
 **$^1\text{H}$  NMR** (500 MHz,  $\text{CDCl}_3$ )  $\delta$  7.73-7.69 (m, 2H), 7.31-7.27 (m, 2H), 3.97 (dd,  $J_1 = 8.5$  Hz,  $J_2 = 5.0$  Hz, 1H), 3.28 (d,  $J = 9.5$  Hz, 1H), 3.17 (dd,  $J_1 = 9.5$  Hz,  $J_2 = 5.0$  Hz, 1H), 2.42 (s, 3H), 2.30-2.26 (m, 1H), 2.19-2.15 (m, 2H), 1.92-1.86 (m, 1H), 1.74-1.69 (m, 1H), 1.41-1.36 (m, 2H), 1.30-1.27 (m, 1H), 1.10-1.06 (m, 1H);  
 **$^{13}\text{C}$  NMR** (126 MHz,  $\text{CDCl}_3$ )  $\delta = 142.97, 136.04, 129.57, 127.13, 60.31, 53.68, 45.95, 40.41, 38.10, 38.01, 37.18, 34.72$ ;  
**HRMS** (ESI) exact mass calculated for  $[\text{M}]$  ( $\text{C}_{15}\text{H}_{19}\text{NO}_2\text{S}$ ) from  $[\text{M}+\text{H}]^+$  requires  $m/z$  277.11365, found  $m/z$  277.11388, difference 0.83 ppm.

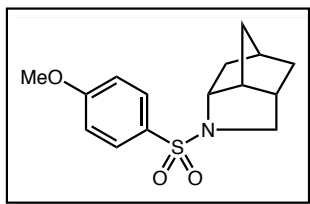

1-((4-methoxyphenyl)sulfonyl)octahydro-3,5-methanocyclopenta[b]pyrrole

The reaction was set up following general procedure B with ( $\pm$ )-*N*-(((1*S*,2*S*,4*S*)-bicyclo[2.2.1]hept-5-en-2-yl)methyl)-4-methoxybenzenesulfonamide (147 mg, 0.5 mmol) for 36 hours. Upon completion, the crude product was purified using silica column chromatography (gradient 100% hexanes to 20% EtOAc/hexanes) to give 128.8 mg (88% yield) of the title compound as a colorless oil.

**IR** (Neat): 2957, 1596, 1497, 1341, 1258, 1253, 1096, 1025, 804, 670  $\text{cm}^{-1}$ ;

**<sup>1</sup>H NMR** (500 MHz, CDCl<sub>3</sub>) δ 7.78-7.74 (m, 2H), 6.99-6.95 (m, 2H), 3.96-3.93 (m, 1H), 3.87 (s, 3H), 3.25 (d, *J* = 9.5 Hz, 1H), 3.17-3.13 (m, 1H), 2.29-2.26 (m, 1H), 2.18-2.13 (m, 2H), 1.90-1.84 (m, 1H), 1.73-1.67 (m, 1H), 1.40-1.33 (m, 2H), 1.29-1.26 (m, 1H), 1.09-1.05 (m, 1H);

**<sup>13</sup>C NMR** (126 MHz, CDCl<sub>3</sub>) δ = 162.60, 130.77, 129.15, 114.09, 60.28, 55.58, 53.68, 45.94, 40.37, 38.10, 38.01, 37.18, 34.72;

**HRMS** (ESI) exact mass calculated for [M] (C<sub>15</sub>H<sub>19</sub>NO<sub>3</sub>S) from [M+H]<sup>+</sup> requires *m/z* 293.10856, found *m/z* 293.10805, difference 1.75 ppm.

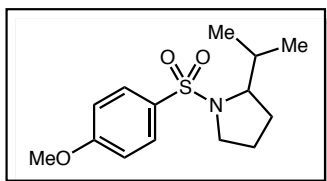

2-isopropyl-1-((4-methoxyphenyl)sulfonyl)pyrrolidine

The reaction was set up following general procedure B with 4-methoxy-*N*-(5-methylhex-4-en-1-yl)benzenesulfonamide (142 mg, 0.5 mmol) for 36 hours. Upon completion, the crude product was purified using silica column chromatography (gradient 100% hexanes to 20% EtOAc/hexanes) to give 135.0 mg (96% yield) of the title compound as a white solid.

**IR** (Neat): 2964, 2875, 1597, 1498, 1340, 1259, 1156, 1093, 671 cm<sup>-1</sup>;

**<sup>1</sup>H NMR** (500 MHz, CDCl<sub>3</sub>) δ 7.79-7.76 (m, 2H), 7.00-6.97 (m, 2H), 3.87 (s, 3H), 3.52-3.48 (m, 1H), 3.32-3.26 (m, 2H), 2.18-2.10 (m, 1H), 1.73-1.60 (m, 2H), 1.50-1.43 (m, 1H), 1.39-1.32 (m, 1H), 0.93 (d, *J* = 7.0 Hz, 3H), 0.89 (d, *J* = 7.0 Hz, 3H);

**<sup>13</sup>C NMR** (126 MHz, CDCl<sub>3</sub>) δ = 162.74, 129.81, 129.51, 114.11, 65.58, 55.58, 49.47, 32.05, 26.15, 24.59, 19.83, 16.53;

**HRMS** (ESI) exact mass calculated for [M] (C<sub>14</sub>H<sub>21</sub>NO<sub>3</sub>S) from [M+H]<sup>+</sup> requires *m/z* 283.12421, found *m/z* 283.12449, difference 0.97 ppm.

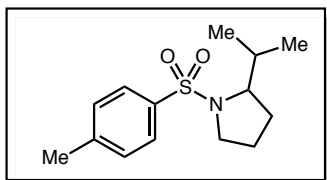

2-isopropyl-1-tosylpyrrolidine

The reaction was set up following general procedure B with 4-methyl-*N*-(5-methylhex-4-en-1-yl)benzenesulfonamide (134 mg, 0.5 mmol) for 36 hours. Upon completion, the crude product was purified using silica column chromatography (gradient 100% hexanes to 15% EtOAc/hexanes) to give 98.7 mg (74% yield) of the title compound as a colorless oil.

**IR** (Neat): 2962, 2874, 1468, 1341, 1158, 1092, 1001, 816, 659 cm<sup>-1</sup>;

**<sup>1</sup>H NMR** (500 MHz, CDCl<sub>3</sub>) δ 7.74-7.71 (m, 2H), 7.33-7.28 (m, 2H), 3.53-3.49 (m, 1H), 3.34-3.26 (m, 2H), 2.43 (s, 3H), 2.21-2.11 (m, 1H), 1.73-1.60 (m, 2H), 1.49-1.42 (m, 1H), 1.38-1.30 (m, 1H), 0.93 (d, *J* = 7.0 Hz, 3H), 0.89 (d, *J* = 7.0 Hz, 3H);

**<sup>13</sup>C NMR** (126 MHz, CDCl<sub>3</sub>) δ = 143.18, 135.06, 129.59, 127.51, 65.61, 49.47, 32.05, 26.13, 24.56, 21.52, 19.82, 16.52.;

**HRMS** (ESI) exact mass calculated for [M] (C<sub>14</sub>H<sub>21</sub>NO<sub>2</sub>S) from [M+H]<sup>+</sup> requires *m/z* 267.12930, found *m/z* 267.12927, difference 0.12 ppm.

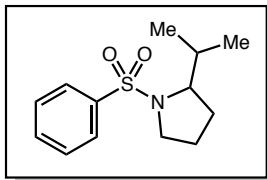

### 2-isopropyl-1-(phenylsulfonyl)pyrrolidine

The reaction was set up following general procedure B with *N*-(5-methylhex-4-en-1-yl)benzenesulfonamide (127 mg, 0.5 mmol) for 36 hours. Upon completion, the crude product was purified using silica column chromatography (gradient 100% hexanes to 15% EtOAc/hexanes) to give 83.5 mg (66% yield) of the title compound as a colorless oil.

**IR** (Neat): 2963, 1446, 1340, 1160, 1092, 996, 719, 693 $\text{cm}^{-1}$ ;

**$^1\text{H}$  NMR** (500 MHz,  $\text{CDCl}_3$ )  $\delta$  7.85-7.82 (m, 2H), 7.61-7.56 (m, 1H), 7.54-7.49 (m, 2H), 3.56-3.52 (m, 1H), 3.36-3.28 (m, 2H), 2.22-2.12 (m, 1H), 1.73-1.60 (m, 2H), 1.51-1.43 (m, 1H), 1.38-1.28 (m, 1H), 0.94 (d,  $J = 7.0$  Hz, 3H), 0.89 (d,  $J = 7.0$  Hz, 3H);

**$^{13}\text{C}$  NMR** (126 MHz,  $\text{CDCl}_3$ )  $\delta = 138.04, 132.49, 128.99, 127.46, 65.68, 49.47, 32.04, 26.14, 24.57, 19.81, 16.51$ ;

**HRMS** (ESI) exact mass calculated for  $[\text{M}]$  ( $\text{C}_{13}\text{H}_{19}\text{NO}_2\text{S}$ ) from  $[\text{M}+\text{H}]^+$  requires  $m/z$  253.11365, found  $m/z$  253.11370, difference 0.21 ppm.

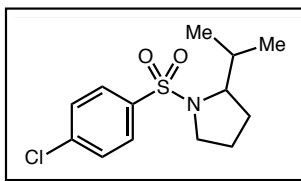

### 1-((4-chlorophenyl)sulfonyl)-2-isopropylpyrrolidine

The reaction was set up following general procedure B with 4-chloro-*N*-(5-methylhex-4-en-1-yl)benzenesulfonamide (144 mg, 0.5 mmol) for 36 hours. Upon completion, the crude product was purified using silica column chromatography (gradient 100% hexanes to 15% EtOAc/hexanes) to give 98.7 mg (69% yield) of the title compound as a white solid.

**IR** (Neat): 2963, 2874, 1585, 1475, 1343, 1160, 1090, 1002, 827, 755 $\text{cm}^{-1}$ ;

**$^1\text{H}$  NMR** (500 MHz,  $\text{CDCl}_3$ )  $\delta$  7.80-7.77 (m, 2H), 7.51-7.48 (m, 2H), 3.53-3.49 (m, 1H), 3.35-3.27 (m, 2H), 2.21-2.11 (m, 1H), 1.76-1.63 (m, 2H), 1.53-1.46 (m, 1H), 1.43-1.35 (m, 1H), 0.93 (d,  $J = 7.0$  Hz, 3H), 0.88 (d,  $J = 7.0$  Hz, 3H);

**$^{13}\text{C}$  NMR** (126 MHz,  $\text{CDCl}_3$ )  $\delta = 138.96, 136.64, 129.30, 128.88, 65.80, 49.50, 32.00, 26.16, 24.60, 19.78, 16.47$ ;

**HRMS** (ESI) exact mass calculated for  $[\text{M}]$  ( $\text{C}_{13}\text{H}_{18}\text{ClNO}_2\text{S}$ ) from  $[\text{M}+\text{H}]^+$  requires  $m/z$  287.07468, found  $m/z$  287.07417, difference 1.76 ppm.

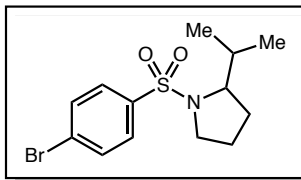

### 1-((4-bromophenyl)sulfonyl)-2-isopropylpyrrolidine

The reaction was set up following general procedure B with 4-bromo-*N*-(5-methylhex-4-en-1-yl)benzenesulfonamide (166 mg, 0.5 mmol) for 36 hours. Upon completion, the crude product was purified using silica column chromatography (gradient 100% hexanes to 15% EtOAc/hexanes) to give 108.8 mg (66% yield) of the title compound as a white solid.

**IR** (Neat): 2963, 2874, 1574, 1469, 1344, 1161, 1090, 1002, 824, 738 $\text{cm}^{-1}$ ;

**<sup>1</sup>H NMR** (500 MHz, CDCl<sub>3</sub>) δ 7.72-7.69 (m, 2H), 7.67-7.64 (m, 2H), 3.52-3.49 (m, 1H), 3.35-3.27 (m, 2H), 2.21-2.11 (m, 1H), 1.76-1.63 (m, 2H), 1.54-1.46 (m, 1H), 1.43-1.35 (m, 1H), 0.93 (d, *J* = 7.0 Hz, 3H), 0.88 (d, *J* = 7.0 Hz, 3H);

**<sup>13</sup>C NMR** (126 MHz, CDCl<sub>3</sub>) δ = 137.15, 132.28, 128.99, 127.43, 65.81, 49.51, 31.99, 26.16, 24.60, 19.78, 16.47;

**HRMS** (ESI) exact mass calculated for [M] (C<sub>13</sub>H<sub>18</sub>BrNO<sub>2</sub>S) from [M+H]<sup>+</sup> requires *m/z* 331.02416, found *m/z* 331.02485, difference 2.09 ppm.

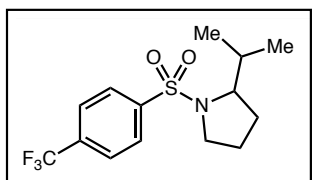

2-isopropyl-1-((4-(trifluoromethyl)phenyl)sulfonyl)pyrrolidine

The reaction was set up following general procedure B with N-(5-methylhex-4-en-1-yl)-4-(trifluoromethyl)benzenesulfonamide (161 mg, 0.5 mmol) for 36 hours. Upon completion, the crude product was purified using silica column chromatography (gradient 100% hexanes to 15% EtOAc/hexanes) to give 105.2 mg (65% yield) of the title compound as a white solid.

**IR** (Neat): 2966, 1404, 1321, 1163, 1131, 1062, 1005, 845, 711 cm<sup>-1</sup>;

**<sup>1</sup>H NMR** (500 MHz, CDCl<sub>3</sub>) δ 7.98 (d, *J* = 8.5 Hz, 2H), 7.80 (d, *J* = 8.5 Hz, 2H), 3.57-3.53 (m, 1H), 3.38-3.30 (m, 2H), 2.23-2.14 (m, 1H), 1.79-1.65 (m, 2H), 1.54-1.47 (m, 1H), 1.44-1.36 (m, 1H), 0.94 (d, *J* = 7.0 Hz, 3H), 0.89 (d, *J* = 7.0 Hz, 3H);

**<sup>13</sup>C NMR** (126 MHz, CDCl<sub>3</sub>) δ = 141.73, 134.15 (q, *J* = 33.1 Hz), 127.94, 126.15, 123.29 (q, *J* = 273.2 Hz), 65.91, 49.52, 31.98, 26.16, 24.61, 19.75, 16.41;

**<sup>19</sup>F NMR** (470 MHz, CDCl<sub>3</sub>) δ = -63.05;

**HRMS** (ESI) exact mass calculated for [M]<sup>+</sup> (C<sub>14</sub>H<sub>18</sub>F<sub>3</sub>NO<sub>2</sub>S) from [M+H]<sup>+</sup> requires *m/z* 321.10103, found *m/z* 321.10062, difference 1.27 ppm.

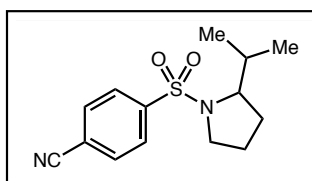

4-((2-isopropylpyrrolidin-1-yl)sulfonyl)benzonitrile

The reaction was set up following general procedure B with 4-cyano-N-(5-methylhex-4-en-1-yl)benzenesulfonamide (139 mg, 0.5 mmol) for 36 hours. Upon completion, the crude product was purified using silica column chromatography (gradient 100% hexanes to 25% EtOAc/hexanes) to give 79.0 mg (57% yield) of the title compound as a white solid.

**IR** (Neat): 2964, 2233, 1468, 1345, 1159, 1090, 1005, 841 cm<sup>-1</sup>;

**<sup>1</sup>H NMR** (500 MHz, CDCl<sub>3</sub>) δ 7.98-7.95 (m, 2H), 7.85-7.82 (m, 1H), 3.57-3.53 (m, 1H), 3.37-3.30 (m, 2H), 2.21-2.12 (m, 1H), 1.80-1.66 (m, 2H), 1.55-1.37 (m, 2H), 0.93 (d, *J* = 7.0 Hz, 3H), 0.87 (d, *J* = 7.0 Hz, 3H);

**<sup>13</sup>C NMR** (126 MHz, CDCl<sub>3</sub>) δ = 142.49, 132.85, 128.01, 117.38, 116.21, 66.02, 49.53, 31.94, 26.18, 24.63, 19.73, 16.40;

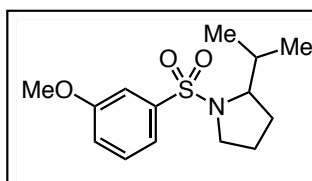

2-isopropyl-1-((3-methoxyphenyl)sulfonyl)pyrrolidine

The reaction was set up following general procedure B with 3-methoxy-N-(5-methylhex-4-en-1-yl)benzenesulfonamide (142 mg, 0.5 mmol) for 36 hours. Upon completion, the crude product was purified using silica column chromatography (gradient 100% hexanes to 25% EtOAc/hexanes) to give 122.0 mg (86% yield) of the title compound as a colorless liquid.

**IR** (Neat): 2963, 1596, 1478, 1342, 1240, 1156, 1040, 1005, 691 $\text{cm}^{-1}$ ;

**$^1\text{H}$  NMR** (500 MHz,  $\text{CDCl}_3$ )  $\delta$  = 7.45-7.39 (m, 2H), 7.36-7.33 (m, 1H), 7.13-7.08 (m, 1H), 3.86 (s, 3H), 3.58-3.52 (m, 1H), 3.38-3.27 (m, 2H), 2.21-2.12 (m, 1H), 1.75-1.61 (m, 2H), 1.53-1.44 (m, 1H), 1.43-1.34 (m, 1H), 0.93 (d,  $J$  = 7.0 Hz, 3H), 0.89 (d,  $J$  = 6.8 Hz, 3H);

**$^{13}\text{C}$  NMR** (126 MHz,  $\text{CDCl}_3$ )  $\delta$  = 159.82, 139.19, 130.05, 119.62, 118.51, 112.55, 65.69, 55.67, 49.48, 32.03, 26.15, 24.58, 19.81, 16.51;

**HRMS** (ESI) exact mass calculated for  $[\text{M}]$  ( $\text{C}_{14}\text{H}_{21}\text{NO}_3\text{S}$ ) from  $[\text{M}+\text{H}]^+$  requires  $m/z$  283.12421, found  $m/z$  283.12391, difference 1.08 ppm.

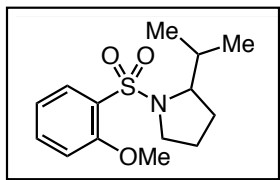

#### 2-isopropyl-1-((2-methoxyphenyl)sulfonyl)pyrrolidine

The reaction was set up following general procedure B with 3-methoxy-N-(5-methylhex-4-en-1-yl)benzenesulfonamide (142 mg, 0.5 mmol) for 36 hours. Upon completion, the crude product was purified using silica column chromatography (gradient 100% hexanes to 25% EtOAc/hexanes) to give 66.2 mg (47% yield) of the title compound as a colorless liquid.

**IR** (Neat): 2962, 1590, 1480, 1331, 1279, 1154, 1072, 1015, 759 $\text{cm}^{-1}$ ;

**$^1\text{H}$  NMR** (500 MHz,  $\text{CDCl}_3$ )  $\delta$  = 7.95 (dd,  $J$  = 7.8, 1.8 Hz, 1H), 7.54 – 7.47 (m, 1H), 7.06 – 6.97 (m, 2H), 3.93 (s, 3H), 3.80 (q,  $J$  = 6.3 Hz, 1H), 3.58 – 3.51 (m, 1H), 3.30 – 3.24 (m, 1H), 2.11 – 2.02 (m, 1H), 1.82 – 1.73 (m, 1H), 1.70 (q,  $J$  = 6.8 Hz, 2H), 1.62 – 1.52 (m, 1H), 0.89 (d,  $J$  = 6.9 Hz, 3H), 0.83 (d,  $J$  = 6.8 Hz, 3H);

**$^{13}\text{C}$  NMR** (126 MHz,  $\text{CDCl}_3$ )  $\delta$  = 156.64, 134.13, 132.18, 127.57, 120.28, 111.99, 65.47, 55.81, 49.13, 31.72, 26.42, 24.88, 19.70, 16.44;

**HRMS** (ESI) exact mass calculated for  $[\text{M}]$  ( $\text{C}_{14}\text{H}_{21}\text{NO}_3\text{S}$ ) from  $[\text{M}+\text{H}]^+$  requires  $m/z$  283.12421, found  $m/z$  283.12381, difference 1.41 ppm.

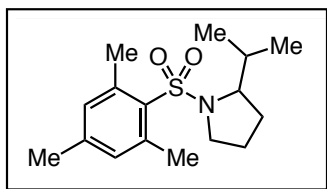

#### 2-isopropyl-1-(mesitylsulfonyl)pyrrolidine

The reaction was set up following general procedure B with 2,4,6-trimethyl-N-(5-methylhex-4-en-1-yl)benzenesulfonamide (148 mg, 0.5 mmol) for 36 hours. Upon completion, the crude product was purified using silica column chromatography (gradient 100% hexanes to 15% EtOAc/hexanes) to give 123.1 mg (83% yield) of the title compound as a colorless liquid.

**IR** (Neat): 2962, 1604, 1473, 1311, 1150, 1058, 978, 667 $\text{cm}^{-1}$ ;

**<sup>1</sup>H NMR** (500 MHz, CDCl<sub>3</sub>) δ = 6.93 (s, 2H), 3.88 – 3.81 (m, 1H), 3.56 – 3.47 (m, 1H), 3.09 – 2.99 (m, 1H), 2.65 (s, 6H), 2.29 (s, 3H), 1.96 – 1.68 (m, 5H), 0.79 – 0.71 (m, 6H).  
**<sup>13</sup>C NMR** (126 MHz, CDCl<sub>3</sub>) δ = 142.30, 140.01, 133.51, 131.83, 64.34, 48.61, 31.12, 26.21, 25.22, 22.89, 20.96, 19.77, 16.17;  
**HRMS** (ESI) exact mass calculated for [M] (C<sub>16</sub>H<sub>25</sub>NO<sub>2</sub>S) from [M+H]<sup>+</sup> requires m/z 295.16060, found m/z 295.16006, difference 1.83 ppm.

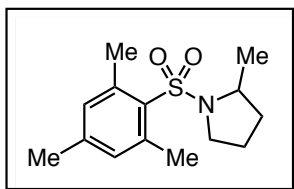

1-(mesitylsulfonyl)-2-methylpyrrolidine

The reaction was set up following general procedure B with 2,4,6-trimethyl-N-(pent-4-en-1-yl)benzenesulfonamide (134 mg, 0.5 mmol) for 36 hours. Upon completion, the crude product was purified using silica column chromatography (gradient 100% hexanes to 15% EtOAc/hexanes) to give 109.2 mg (82% yield) of the title compound as a white solid.

**IR** (Neat): 2970, 1604, 1454, 1308, 1149, 1059, 852, 667cm<sup>-1</sup>;  
**<sup>1</sup>H NMR** (500 MHz, CDCl<sub>3</sub>) δ = 6.94 (s, 2H), 4.06 – 3.94 (m, 1H), 3.39 – 3.29 (m, 1H), 3.20 – 3.10 (m, 1H), 2.65 (s, 6H), 2.29 (s, 3H), 2.13 – 2.00 (m, 1H), 1.93 – 1.80 (m, 2H), 1.62 – 1.53 (m, 1H), 1.05 (d, *J* = 6.4 Hz, 3H).  
**<sup>13</sup>C NMR** (126 MHz, CDCl<sub>3</sub>) δ = 142.33, 140.10, 133.43, 131.81, 54.81, 47.45, 33.97, 24.11, 22.84, 21.31, 20.97.  
**HRMS** (ESI) exact mass calculated for [M] (C<sub>14</sub>H<sub>21</sub>NO<sub>2</sub>S) from [M+H]<sup>+</sup> requires m/z 267.12930, found m/z 267.12912, difference 0.68 ppm.

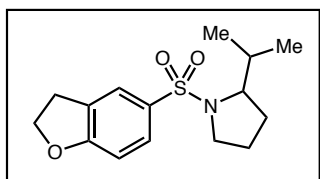

1-((2,3-dihydrobenzofuran-5-yl)sulfonyl)-2-isopropylpyrrolidine

The reaction was set up following general procedure B with N-(5-methylhex-4-en-1-yl)-2,3-dihydrobenzofuran-5-sulfonamide (148 mg, 0.5 mmol) for 36 hours. Upon completion, the crude product was purified using silica column chromatography (gradient 100% hexanes to 25% EtOAc/hexanes) to give 132.8 mg (90% yield) of the title compound as a white solid.

**IR** (Neat): 2962, 1605, 1485, 1472, 1339, 1240, 1144, 1065, 981, 891, 696cm<sup>-1</sup>;  
**<sup>1</sup>H NMR** (500 MHz, CDCl<sub>3</sub>) δ 7.66-7.65 (m, 1H), 7.63-7.61 (m, 1H), 6.85-6.83 (m, 1H), 4.70-4.66 (m, 2H), 3.52-3.48 (m, 1H), 3.30-3.26 (m, 4H), 2.20-2.10 (m, 1H), 1.74-1.61 (m, 2H), 1.53-1.46 (m, 1H), 1.43-1.35 (m, 1H), 0.93 (d, *J* = 7.0 Hz, 3H), 0.89 (d, *J* = 7.0 Hz, 3H);  
**<sup>13</sup>C NMR** (126 MHz, CDCl<sub>3</sub>) δ = 169.43, 146.45, 132.46, 132.03, 128.00, 123.89, 116.56, 65.62, 49.49, 49.13, 32.06, 27.65, 26.17, 24.61, 24.30, 19.83, 16.53;  
**HRMS** (ESI) exact mass calculated for [M] (C<sub>15</sub>H<sub>21</sub>NO<sub>3</sub>S) from [M+H]<sup>+</sup> requires m/z 295.12421, found m/z 295.12444, difference 0.76 ppm.

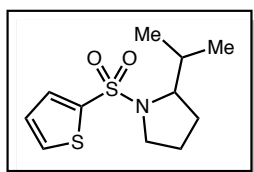

2-isopropyl-1-(thiophen-2-ylsulfonyl)pyrrolidine

The reaction was set up following general procedure B with N-(5-methylhex-4-en-1-yl)thiophene-2-sulfonamide (130 mg, 0.5 mmol) for 36 hours. Upon completion, the crude product was purified using silica column chromatography (gradient 100% hexanes to 16% EtOAc/hexanes) to give 116.2 mg (89% yield) of the title compound as a white solid.

**IR** (Neat): 3114, 1964, 1334, 1150, 1017, 854, 742, 672  $\text{cm}^{-1}$ ;

**$^1\text{H}$  NMR** (500 MHz,  $\text{CDCl}_3$ )  $\delta$  7.60-7.57 (m, 2H), 7.14-7.12 (m, 1H), 3.56-3.52 (m, 1H), 3.39-3.36 (m, 2H), 2.22-2.13 (m, 1H), 1.78-1.64 (m, 2H), 1.53-1.46 (m, 1H), 1.43-1.35 (m, 1H), 0.96-0.91 (m, 6H);

**$^{13}\text{C}$  NMR** (126 MHz,  $\text{CDCl}_3$ )  $\delta$  = 137.87, 132.00, 131.47, 127.34, 66.05, 49.72, 32.06, 26.12, 24.54, 19.80, 16.58;

**HRMS** (ESI) exact mass calculated for [M] ( $\text{C}_{11}\text{H}_{17}\text{NO}_2\text{S}_2$ ) from  $[\text{M}+\text{H}]^+$  requires m/z 259.07007, found m/z 259.06997, difference 0.39 ppm.

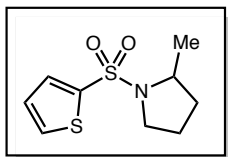

#### 2-methyl-1-(thiophen-2-ylsulfonyl)pyrrolidine

The reaction was set up following general procedure B with N-(pent-4-en-1-yl)thiophene-2-sulfonamide (116 mg, 0.5 mmol) for 36 hours. Upon completion, the crude product was purified using silica column chromatography (gradient 100% hexanes to 16% EtOAc/hexanes) to give 91.0 mg (79% yield) of the title compound as a colorless liquid.

**IR** (Neat): 3114, 1964, 1334, 1150, 1017, 854, 742, 672  $\text{cm}^{-1}$ ;

**$^1\text{H}$  NMR** (500 MHz,  $\text{CDCl}_3$ )  $\delta$  7.63 – 7.55 (m, 2H), 7.16 – 7.11 (m, 1H), 3.79 – 3.71 (m, 1H), 3.53 – 3.46 (m, 1H), 3.24 – 3.17 (m, 1H), 1.93 – 1.83 (m, 1H), 1.76 – 1.70 (m, 1H), 1.61 – 1.50 (m, 2H), 1.35 (d,  $J$  = 6.3 Hz, 3H).

**$^{13}\text{C}$  NMR** (126 MHz,  $\text{CDCl}_3$ )  $\delta$  = 137.70, 131.95, 131.41, 127.33, 56.63, 49.32, 33.40, 23.97, 22.83.

**HRMS** (ESI) exact mass calculated for [M] ( $\text{C}_9\text{H}_{13}\text{NO}_2\text{S}_2$ ) from  $[\text{M}+\text{H}]^+$  requires m/z 231.03877, found m/z 231.03832, difference 1.93 ppm.

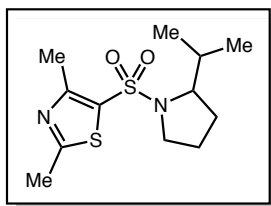

#### 5-((2-isopropylpyrrolidin-1-yl)sulfonyl)-2,4-dimethylthiazole

The reaction was set up following general procedure B with 2,4-dimethyl-N-(5-methylhex-4-en-1-yl)thiazole-5-sulfonamide (144 mg, 0.5 mmol) for 36 hours. Upon completion, the crude product was purified using silica column chromatography (gradient 100% hexanes to 25% EtOAc/hexanes) to give 116.6 mg (81% yield) of the title compound as a white solid.

**IR** (Neat): 2962, 1465, 1344, 1287, 1157, 1076, 1004, 737  $\text{cm}^{-1}$ ;

**$^1\text{H}$  NMR** (500 MHz,  $\text{CDCl}_3$ )  $\delta$  3.59-3.55 (m, 1H), 3.41-3.32 (m, 2H), 2.70 (s, 3H), 2.67 (s, 3H), 2.22-2.15 (m, 1H), 1.84-1.71 (m, 2H), 1.68-1.52 (m, 2H), 0.93 (d,  $J$  = 7.0 Hz, 3H), 0.90 (d,  $J$  = 7.0 Hz, 3H);

**$^{13}\text{C}$  NMR** (126 MHz,  $\text{CDCl}_3$ )  $\delta$  = 168.40, 156.05, 127.30, 65.91, 49.63, 31.87, 26.17, 24.70, 19.79, 19.41, 16.82, 16.37;



**HRMS** (ESI) exact mass calculated for [M] (C<sub>12</sub>H<sub>20</sub>N<sub>2</sub>O<sub>2</sub>S<sub>2</sub>) from [M+H]<sup>+</sup> requires m/z 288.09662, found m/z 288.09702, difference 1.39 ppm.

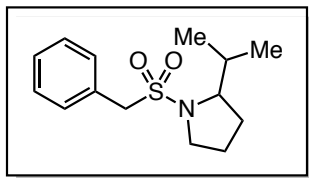

#### 1-(benzylsulfonyl)-2-isopropylpyrrolidine

The reaction was set up following general procedure B with N-(5-methylhex-4-en-1-yl)-1-phenylmethanesulfonamide (134 mg, 0.5 mmol) for 36 hours. Upon completion, the crude product was purified using silica column chromatography (gradient 100% hexanes to 15% EtOAc/hexanes) to give 108.7 mg (81% yield) of the title compound as a white solid.

**IR** (Neat): 2962, 1456, 1334, 1150, 1126, 1007, 779, 597cm<sup>-1</sup>;

**<sup>1</sup>H NMR** (500 MHz, CDCl<sub>3</sub>) δ = 7.49 – 7.40 (m, 2H), 7.40 – 7.32 (m, 3H), 4.27 – 4.17 (m, 2H), 3.68 – 3.60 (m, 1H), 3.37 – 3.28 (m, 1H), 3.15 – 3.04 (m, 1H), 2.09 – 1.97 (m, 1H), 1.82 – 1.63 (m, 4H), 0.83 (d, *J* = 6.9 Hz, 3H), 0.79 (d, *J* = 6.8 Hz, 3H).

**<sup>13</sup>C NMR** (126 MHz, CDCl<sub>3</sub>) δ = 130.74, 129.30, 128.66, 128.55, 65.43, 56.60, 49.62, 31.86, 26.05, 25.41, 19.62, 16.19.

**HRMS** (ESI) exact mass calculated for [M] (C<sub>14</sub>H<sub>21</sub>NO<sub>2</sub>S) from [M+H]<sup>+</sup> requires m/z 267.12930, found m/z 267.12894, difference 1.33 ppm.

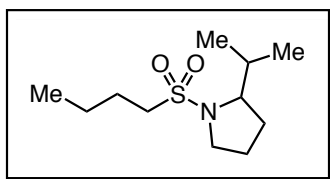

#### 1-(butylsulfonyl)-2-isopropylpyrrolidine

The reaction was set up following general procedure B with N-(5-methylhex-4-en-1-yl)butane-1-sulfonamide (117 mg, 0.5 mmol) for 36 hours. Upon completion, the crude product was purified using silica column chromatography (gradient 100% hexanes to 20% EtOAc/hexanes) to give 80.1 mg (69% yield) of the title compound as a colorless oil.

**IR** (Neat): 2960, 2874, 1468, 1332, 1142, 1053, 1003, 772cm<sup>-1</sup>;

**<sup>1</sup>H NMR** (500 MHz, CDCl<sub>3</sub>) δ = 3.77 – 3.71 (m, 1H), 3.55 – 3.47 (m, 1H), 3.26 – 3.19 (m, 1H), 2.95 – 2.89 (m, 2H), 2.12 – 2.04 (m, 1H), 1.90 – 1.73 (m, 6H), 1.51 – 1.41 (m, 2H), 0.95 (t, *J* = 7.4 Hz, 3H), 0.91 (d, *J* = 6.9 Hz, 3H), 0.88 (d, *J* = 6.8 Hz, 3H).

**<sup>13</sup>C NMR** (126 MHz, CDCl<sub>3</sub>) δ = 65.03, 49.81, 49.22, 31.86, 26.31, 25.51, 25.26, 21.79, 19.65, 16.28, 13.65.

**HRMS** (ESI) exact mass calculated for [M] (C<sub>11</sub>H<sub>23</sub>NO<sub>2</sub>S) from [M+H]<sup>+</sup> requires m/z 233.14495, found m/z 233.14517, difference 0.93 ppm.

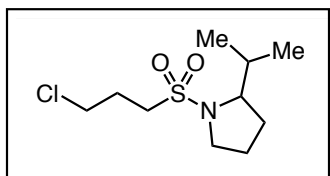

#### 1-((3-chloropropyl)sulfonyl)-2-isopropylpyrrolidine

The reaction was set up following general procedure B with 3-chloro-N-(5-methylhex-4-en-1-yl)propane-1-sulfonamide (127 mg, 0.5 mmol) for 36 hours. Upon completion, the crude product was purified using silica column

chromatography (gradient 100% hexanes to 20% EtOAc/hexanes) to give 89.1 mg (70% yield) of the title compound as a colorless oil.

**IR** (Neat): 2963, 1468, 1331, 1307, 1145, 1006, 750 $\text{cm}^{-1}$ ;

**$^1\text{H}$  NMR** (500 MHz,  $\text{CDCl}_3$ )  $\delta$  = 3.79 – 3.67 (m, 3H), 3.58 – 3.47 (m, 1H), 3.30 – 3.20 (m, 1H), 3.09 (d,  $J$  = 7.5 Hz, 2H), 2.38 – 2.26 (m, 2H), 2.15 – 2.03 (m, 1H), 1.95 – 1.75 (m, 4H), 0.92 (d,  $J$  = 6.9 Hz, 3H), 0.89 (d,  $J$  = 6.8 Hz, 3H).

**$^{13}\text{C}$  NMR** (126 MHz,  $\text{CDCl}_3$ )  $\delta$  = 65.22, 49.28, 47.00, 43.22, 31.84, 26.55, 26.32, 25.48, 19.65, 16.30.

**HRMS** (ESI) exact mass calculated for [M] ( $\text{C}_{10}\text{H}_{20}\text{NO}_2\text{S}$ ) from  $[\text{M}+\text{H}]^+$  requires  $m/z$  253.09033, found  $m/z$  253.09030, difference 0.12 ppm.

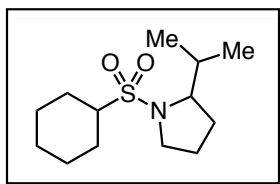

#### 1-(cyclohexylsulfonyl)-2-isopropylpyrrolidine

The reaction was set up following general procedure B with N-(5-methylhex-4-en-1-yl)cyclohexanesulfonamide (130 mg, 0.5 mmol) for 36 hours. Upon completion, the crude product was purified using silica column chromatography (gradient 100% hexanes to 15% EtOAc/hexanes) to give 86.8 mg (67% yield) of the title compound as a colorless oil.

**IR** (Neat): 2935, 2869, 1453, 1320, 1138, 994 $\text{cm}^{-1}$ ;

**$^1\text{H}$  NMR** (500 MHz,  $\text{CDCl}_3$ )  $\delta$  = 3.93 (dt,  $J$  = 7.9, 5.1 Hz, 1H), 3.63 – 3.56 (m, 1H), 3.15 – 3.08 (m, 1H), 2.93 – 2.84 (m, 1H), 2.21 – 2.03 (m, 3H), 1.92 – 1.78 (m, 5H), 1.75 – 1.68 (m, 2H), 1.62 – 1.51 (m, 2H), 1.31 – 1.17 (m, 3H), 0.89 (d,  $J$  = 6.9 Hz, 3H), 0.87 (d,  $J$  = 6.9 Hz, 3H).

**$^{13}\text{C}$  NMR** (126 MHz,  $\text{CDCl}_3$ )  $\delta$  = 64.85, 61.69, 49.67, 31.70, 26.55, 26.42, 25.95, 25.86, 25.31, 25.31, 25.24, 19.63, 16.09.

**HRMS** (ESI) exact mass calculated for [M] ( $\text{C}_{13}\text{H}_{25}\text{NO}_2\text{S}$ ) from  $[\text{M}+\text{H}]^+$  requires  $m/z$  259.16060, found  $m/z$  259.16049, difference 0.43 ppm.

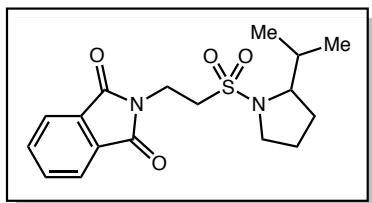

#### 2-(2-((2-isopropylpyrrolidin-1-yl)sulfonyl)ethyl)isoindoline-1,3-dione

The reaction was set up following general procedure B with 2-(1,3-dioxoisoindolin-2-yl)-N-(5-methylhex-4-en-1-yl)ethanesulfonamide (175 mg, 0.5 mmol) for 36 hours. Upon completion, the crude product was purified using silica column chromatography (gradient 5% to 40% EtOAc/hexanes) to give 134.8 mg (77% yield) of the title compound as a white solid.

**IR** (Neat): 2962, 1710, 1396, 1334, 1144, 717 $\text{cm}^{-1}$ ;

**$^1\text{H}$  NMR** (500 MHz,  $\text{CDCl}_3$ )  $\delta$  7.88-7.84 (m, 2H), 7.76-7.72 (m, 1H), 4.23-4.12 (m, 2H), 3.79-3.75 (m, 1H), 3.58-3.53 (m, 1H), 3.40-3.26 (m, 3H), 2.12-2.04 (m, 1H), 1.93-1.76 (m, 4H), 0.92-0.89 (m, 6H);

$^{13}\text{C}$  NMR (126 MHz,  $\text{CDCl}_3$ )  $\delta$  = 167.67, 134.23, 131.89, 123.49, 65.32, 49.29, 47.09, 32.52, 31.77, 26.30, 25.43, 19.62, 16.26;

**HRMS** (ESI) exact mass calculated for  $[\text{M}]$  ( $\text{C}_{17}\text{H}_{21}\text{N}_2\text{O}_4\text{S}$ ) from  $[\text{M}+\text{H}]^+$  requires  $m/z$  350.13003, found  $m/z$  350.12988, difference 0.42 ppm.

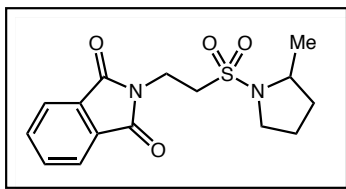

2-(2-((2-methylpyrrolidin-1-yl)sulfonyl)ethyl)isoindoline-1,3-dione

The reaction was set up following general procedure B with 2-(1,3-dioxisoindolin-2-yl)-N-(pent-4-en-1-yl)ethanesulfonamide (161 mg, 0.5 mmol) for 36 hours.

Upon completion, the crude product was purified using silica column chromatography (gradient 5% to 40% EtOAc/hexanes) to give 122.4 mg (76% yield) of the title compound as a white solid.

**IR** (Neat): 2971, 1709, 1396, 1328, 1145, 1084, 977, 866,  $717\text{cm}^{-1}$ ;

$^1\text{H}$  NMR (500 MHz,  $\text{CDCl}_3$ )  $\delta$  7.89 – 7.84 (m, 2H), 7.77 – 7.72 (m, 2H), 4.22 – 4.10 (m, 2H), 4.00 – 3.94 (m, 1H), 3.47 – 3.39 (m, 2H), 3.39 – 3.31 (m, 2H), 2.14 – 2.05 (m, 1H), 2.04 – 1.85 (m, 2H), 1.67 – 1.58 (m, 1H), 1.28 (d,  $J$  = 6.4 Hz, 3H).

$^{13}\text{C}$  NMR (126 MHz,  $\text{CDCl}_3$ )  $\delta$  = 167.67, 134.23, 131.88, 123.48, 56.01, 48.55, 47.47, 33.85, 32.55, 24.51, 22.34.

**HRMS** (ESI) exact mass calculated for  $[\text{M}]$  ( $\text{C}_{15}\text{H}_{18}\text{N}_2\text{O}_4\text{S}$ ) from  $[\text{M}+\text{H}]^+$  requires  $m/z$  322.09873, found  $m/z$  322.09828, difference 1.4 ppm.

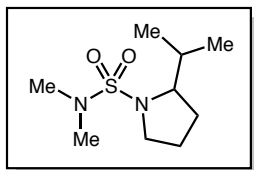

2-isopropyl-N,N-dimethylpyrrolidine-1-sulfonamide

The reaction was set up following general procedure B with N'-(5-methylhex-4-en-1-yl)-N,N-dimethylsulfonamide (110 mg, 0.5 mmol) for 36 hours. Upon completion, the crude product was purified using silica column chromatography (gradient 100%

hexanes to 20% EtOAc/hexanes) to give 100.3 mg (91% yield) of the title compound as a colorless oil.

**IR** (Neat): 2960, 2875, 1465, 1326, 1143, 959,  $707\text{cm}^{-1}$ ;

$^1\text{H}$  NMR (500 MHz,  $\text{CDCl}_3$ )  $\delta$  3.77-3.73 (m, 1H), 3.48-3.42 (m, 1H), 3.12-3.07 (m, 1H), 2.82 (s, 6H), 2.14-2.08 (m, 1H), 1.91-1.81 (m, 3H), 1.87-1.70 (m, 1H), 0.90-0.87 (m, 6H);

$^{13}\text{C}$  NMR (126 MHz,  $\text{CDCl}_3$ )  $\delta$  = 65.54, 49.54, 38.02, 31.26, 25.89, 25.43, 19.70, 16.18;

**HRMS** (ESI) exact mass calculated for  $[\text{M}]$  ( $\text{C}_9\text{H}_{20}\text{N}_2\text{O}_2\text{S}$ ) from  $[\text{M}+\text{H}]^+$  requires  $m/z$  220.12455, found  $m/z$  220.12440, difference 0.69 ppm.

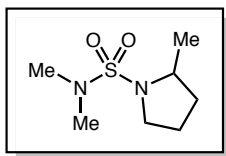

2-isopropyl-N,N-dimethylpyrrolidine-1-sulfonamide

The reaction was set up following general procedure B with N'-(pent-4-en-1-yl)-N,N-dimethylsulfonamide (96 mg, 0.5 mmol) for 36 hours. Upon completion, the crude product was purified using silica

column chromatography (gradient 100% hexanes to 20% EtOAc/hexanes) to give 76.6 mg (80% yield) of the title compound as a light-yellow oil.

**IR** (Neat): 2966, 1460, 1321, 1143, 956, 714 $\text{cm}^{-1}$ ;

**$^1\text{H}$  NMR** (500 MHz,  $\text{CDCl}_3$ )  $\delta$  3.98 – 3.88 (m, 1H), 3.41 – 3.33 (m, 1H), 3.29 – 3.21 (m, 1H), 2.80 (s, 6H), 2.13 – 2.01 (m, 1H), 1.97 – 1.84 (m, 2H), 1.63 – 1.53 (m, 1H), 1.23 (d,  $J = 6.4$  Hz, 3H).

**$^{13}\text{C}$  NMR** (126 MHz,  $\text{CDCl}_3$ )  $\delta = 56.27, 48.83, 37.91, 33.60, 24.46, 21.87$ .

**HRMS** (ESI) exact mass calculated for  $[\text{M}]$  ( $\text{C}_7\text{H}_{16}\text{N}_2\text{O}_2\text{S}$ ) from  $[\text{M}+\text{H}]^+$  requires  $m/z$  192.09325, found  $m/z$  192.09321, difference 0.18 ppm.

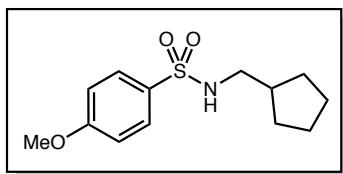

#### *N*-(cyclopentylmethyl)-4-methoxybenzenesulfonamide

The reaction was set up following general procedure C with 4-methoxybenzenesulfonamide (94 mg, 0.5 mmol) and methylenecyclopentene (82 mg, 1.0 mmol, 2.0 eq) for 36 hours. Upon completion, the crude product was purified

using silica column chromatography (gradient 100% hexanes to 25% EtOAc/hexanes) to give 85.8 mg (64% yield) of the title compound as a colorless oil.

**IR** (Neat): 3281, 2952, 1597, 1498, 1324, 1259, 1153, 1095, 834, 670  $\text{cm}^{-1}$ ;

**$^1\text{H}$  NMR** (500 MHz,  $\text{CDCl}_3$ )  $\delta$  7.82-7.79 (m, 2H), 7.00-6.97 (m, 2H), 4.53 (br, 1H), 3.88 (s, 3H), 2.86-2.82 (m, 2H), 2.01-1.92 (m, 1H), 1.73-1.67 (m, 2H), 1.57-1.48 (m, 4H), 1.14-1.07 (m, 2H);

**$^{13}\text{C}$  NMR** (126 MHz,  $\text{CDCl}_3$ )  $\delta = 162.78, 131.53, 129.21, 114.20, 55.62, 48.19, 39.47, 30.19, 25.17$ ;

**HRMS** (ESI) exact mass calculated for  $[\text{M}]$  ( $\text{C}_{13}\text{H}_{19}\text{NO}_3\text{S}$ ) from  $[\text{M}+\text{H}]^+$  requires  $m/z$  269.10856, found  $m/z$  269.10835, difference 0.81 ppm.

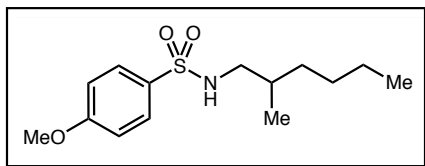

#### 4-methoxy-*N*-(2-methylhexyl)benzenesulfonamide

The reaction was set up following general procedure C with 4-methoxybenzenesulfonamide (94 mg, 0.5 mmol) and 2-methylhex-1-ene (147 mg, 1.5 mmol) for 36 hours. Upon completion, the crude product

was purified using silica column chromatography (gradient 100% hexanes to 25% EtOAc/hexanes) to give 118.0 mg (82% yield) of the title compound as a colorless liquid.

**IR** (Neat): 3284, 2928, 1597, 1499, 1324, 1259, 1154, 1096, 1027, 834, 669  $\text{cm}^{-1}$ ;

**$^1\text{H}$  NMR** (500 MHz,  $\text{CDCl}_3$ )  $\delta$  7.82-7.79 (m, 2H), 6.99-6.96 (m, 2H), 4.70 (br, 1H), 3.87 (s, 3H), 2.85-2.80 (m, 1H), 2.73-2.68 (m, 1H), 1.57-1.51 (m, 1H), 1.31-1.02 (m, 6H), 0.86-0.83 (m, 6H);

**$^{13}\text{C}$  NMR** (126 MHz,  $\text{CDCl}_3$ )  $\delta = 162.76, 131.61, 129.19, 114.19, 55.61, 49.04, 33.68, 33.10, 28.88, 22.80, 17.49, 14.03$ ;

**HRMS** (ESI) exact mass calculated for  $[\text{M}]$  ( $\text{C}_{14}\text{H}_{23}\text{NO}_3\text{S}$ ) from  $[\text{M}+\text{H}]^+$  requires  $m/z$  285.13986, found  $m/z$  285.13988, difference 0.06 ppm.

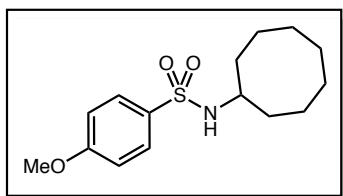

#### N-cyclooctyl-4-methoxybenzenesulfonamide

The reaction was set up following general procedure C with 4-methoxybenzenesulfonamide (94 mg, 0.5 mmol) and (Z)-cyclooctene (165 mg, 1.5 mmol) for 36 hours. Upon completion, the crude product was purified using silica column chromatography (gradient 100% hexanes to 25% EtOAc/hexanes) to give 111.7 mg (75% yield) of the title compound as a white solid.

**IR** (Neat): 3277, 2921, 1597, 1498, 1300, 1257, 1152, 1096, 1023, 833, 669  $\text{cm}^{-1}$ ;  
 **$^1\text{H NMR}$**  (500 MHz,  $\text{CDCl}_3$ )  $\delta$  7.84-7.80 (m, 2H), 6.99-6.96 (m, 2H), 4.73 (br, 1H), 3.87 (s, 3H), 3.37-3.04 (m, 1H), 1.72-1.66 (m, 2H), 1.59-1.33 (m, 12H);  
 **$^{13}\text{C NMR}$**  (126 MHz,  $\text{CDCl}_3$ )  $\delta$  = 162.62, 132.82, 129.09, 114.13, 55.60, 53.80, 32.56, 27.21, 25.23, 23.15;  
**HRMS** (ESI) exact mass calculated for [M] ( $\text{C}_{15}\text{H}_{23}\text{NO}_3\text{S}$ ) from  $[\text{M}+\text{H}]^+$  requires  $m/z$  297.13986, found  $m/z$  297.13972, difference 0.50 ppm.

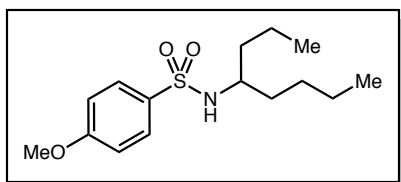

#### 4-methoxy-N-(octan-4-yl)benzenesulfonamide

The reaction was set up following general procedure C with 4-methoxybenzenesulfonamide (94 mg, 0.5 mmol) and (Z/E)-oct-4-ene (168 mg, 1.5 mmol) for 36 hours. Upon completion, the crude product was purified using silica column chromatography (gradient 100% hexanes to 25% EtOAc/hexanes) to give 129.6 mg (86% yield) of the title compound as a white solid. And 118.4 mg (79% yield) from (E)-oct-4-ene.

**IR** (Neat): 3281, 2957, 1597, 1498, 1322, 1258, 1154, 1096, 1027, 834, 670  $\text{cm}^{-1}$ ;  
 **$^1\text{H NMR}$**  (500 MHz,  $\text{CDCl}_3$ )  $\delta$  7.83-7.79 (m, 2H), 6.99-6.95 (m, 2H), 4.60 (br, 1H), 3.87 (s, 3H), 3.22-3.15 (m, 1H), 1.41-1.07 (m, 10H), 0.80-0.77 (m, 6H);  
 **$^{13}\text{C NMR}$**  (126 MHz,  $\text{CDCl}_3$ )  $\delta$  = 162.63, 133.13, 129.09, 114.02, 55.61, 53.79, 37.17, 34.65, 27.35, 22.46, 18.46, 13.87;  
**HRMS** (ESI) exact mass calculated for [M] ( $\text{C}_{15}\text{H}_{25}\text{NO}_3\text{S}$ ) from  $[\text{M}+\text{H}]^+$  requires  $m/z$  299.15551, found  $m/z$  299.15579, difference 0.92 ppm.

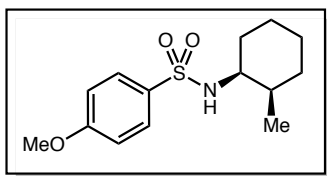

#### (±)-4-methoxy-N-((1S,2R)-2-methylcyclohexyl)benzenesulfonamide

The reaction was set up following general procedure C with 4-methoxybenzenesulfonamide (94 mg, 0.5 mmol) and 1-methylcyclohex-1-ene (144 mg, 1.5 mmol) for 36 hours. Upon completion, the crude product was purified using silica column chromatography (gradient 100% hexanes to 25% EtOAc/hexanes) to give 85.5 mg (60% yield) of the title compound as a white solid (cis:trans ratio is determined by HNMR of crude reaction to be 1:2).

**IR** (Neat): 3290, 2930, 1597, 1499, 1326, 1259, 1158, 1147, 1096, 1022, 834, 672  $\text{cm}^{-1}$ ;  
 **$^1\text{H}$  NMR** (500 MHz,  $\text{CDCl}_3$ )  $\delta$  7.84-7.80 (m, 2H), 6.98-6.94 (m, 2H), 4.71 (br, 1H), 3.87 (s, 3H), 3.33-3.29 (m, 1H), 1.70-1.62 (m, 1H), 1.54-1.48 (m, 2H), 1.45-1.30 (m, 4H), 1.26-1.11 (m, 2H), 0.75 (d,  $J = 7.0$  Hz, 3H);  
 **$^{13}\text{C}$  NMR** (126 MHz,  $\text{CDCl}_3$ )  $\delta = 162.64, 132.85, 129.14, 114.08, 55.59, 54.35, 34.36, 30.32, 29.88, 23.43, 21.59, 16.46$ ;  
**HRMS** (ESI) exact mass calculated for  $[\text{M}]$  ( $\text{C}_{14}\text{H}_{21}\text{NO}_3\text{S}$ ) from  $[\text{M}+\text{H}]^+$  requires  $m/z$  284.13204, found  $m/z$  284.13187, difference 0.59 ppm.

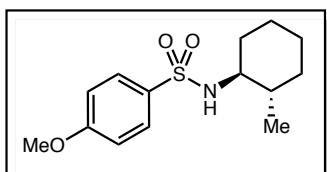

(±)-4-methoxy-N-((1S,2S)-2-methylcyclohexyl)benzenesulfonamide

**IR** (Neat): 3279, 2928, 1597, 1498, 1324, 1258, 1151, 1091, 1027, 834, 670  $\text{cm}^{-1}$ ;  
 **$^1\text{H}$  NMR** (500 MHz,  $\text{CDCl}_3$ )  $\delta$  7.83-7.79 (m, 2H), 6.99-6.95 (m, 2H), 4.47 (br, 1H), 3.87 (s, 3H), 2.73-2.67 (m, 1H), 1.78-1.55 (m, 4H), 1.25-0.92 (m, 5H), 0.81 (d,  $J = 7.0$  Hz, 3H);  
 **$^{13}\text{C}$  NMR** (126 MHz,  $\text{CDCl}_3$ )  $\delta = 162.58, 133.23, 129.07, 114.05, 59.08, 55.58, 38.40, 34.70, 34.42, 25.48, 25.35, 19.13$ ;  
**HRMS** (ESI) exact mass calculated for  $[\text{M}]$  ( $\text{C}_{14}\text{H}_{21}\text{NO}_3\text{S}$ ) from  $[\text{M}+\text{H}]^+$  requires  $m/z$  284.13204, found  $m/z$  284.13148, difference 1.97 ppm.

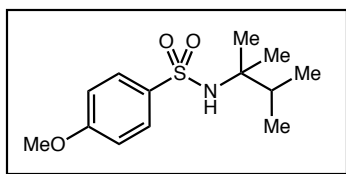

N-(2,3-dimethylbutan-2-yl)-4-methoxybenzenesulfonamide

The reaction was set up following general procedure C with 4-methoxybenzenesulfonamide (94 mg, 0.5 mmol) and 2,3-dimethyl-2-butene (126 mg, 1.5 mmol) for 36 hours. Upon completion, the crude product was purified using silica column chromatography (gradient 100% hexanes to 25% EtOAc/hexanes) to give 121.7 mg (89% yield) of the title compound as a colorless liquid.

**IR** (Neat): 3279, 2974, 1598, 1499, 1313, 1257, 1142, 1095, 1025, 834, 667  $\text{cm}^{-1}$ ;  
 **$^1\text{H}$  NMR** (500 MHz,  $\text{CDCl}_3$ )  $\delta$  7.84-7.80 (m, 2H), 6.97-6.93 (m, 2H), 4.74 (br, 1H), 3.87 (s, 3H), 1.81-1.73 (m, 1H), 1.12 (s, 6H), 0.86 (d,  $J = 7.0$  Hz, 6H);  
 **$^{13}\text{C}$  NMR** (126 MHz,  $\text{CDCl}_3$ )  $\delta = 162.35, 135.38, 129.04, 113.93, 59.83, 55.56, 38.11, 24.31, 17.23$ ;  
**HRMS** (ESI) exact mass calculated for  $[\text{M}]$  ( $\text{C}_{13}\text{H}_{21}\text{NO}_3\text{S}$ ) from  $[\text{M}+\text{Na}]^+$  requires  $m/z$  271.12421, found  $m/z$  271.12432, difference 0.39 ppm.

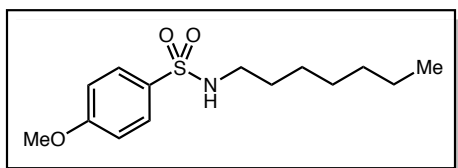

N-heptyl-4-methoxybenzenesulfonamide

The reaction was set up following general procedure C with 4-methoxybenzenesulfonamide (94 mg, 0.5 mmol) and hept-1-ene (147 mg, 1.5 mmol) for 36 hours. Upon completion, the crude

product was purified using silica column chromatography (gradient 100% hexanes to 25% EtOAc/hexanes) to give 86.5 mg (60% yield) of the title compound as a colorless liquid.

**IR** (Neat): 3281, 2928, 1597, 1499, 1323, 1259, 1153, 1096, 1027, 834, 670  $\text{cm}^{-1}$ ;  
 **$^1\text{H}$  NMR** (500 MHz,  $\text{CDCl}_3$ )  $\delta$  7.82-7.79 (m, 2H), 7.00-6.96 (m, 2H), 4.55 (br, 1H), 3.87 (s, 3H), 2.91 (q,  $J = 6.5$  Hz, 2H), 1.47-1.41 (m, 2H), 1.27-1.20 (m, 8H), 0.85 (t,  $J = 7.0$  Hz, 3H);  
 **$^{13}\text{C}$  NMR** (126 MHz,  $\text{CDCl}_3$ )  $\delta = 162.80, 131.55, 129.22, 114.20, 55.61, 43.19, 31.63, 29.51, 28.74, 26.49, 22.53, 14.05$ ;  
**HRMS** (ESI) exact mass calculated for [M] ( $\text{C}_{14}\text{H}_{23}\text{NO}_3\text{S}$ ) from  $[\text{M}+\text{H}]^+$  requires  $m/z$  285.13986, found  $m/z$  285.13983, difference 0.11 ppm.

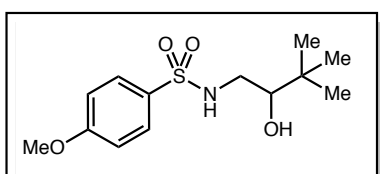

*N*-(2-hydroxy-3,3-dimethylbutyl)-4-methoxybenzenesulfonamide

The reaction was set up following general procedure C with 4-methoxybenzenesulfonamide (94 mg, 0.5 mmol) and ((3,3-dimethylbut-1-en-2-yl)oxy)trimethylsilane (259 mg, 1.5 mmol) for 36 hours. Upon completion, the crude product was purified using silica column chromatography (gradient 100% hexanes to 40% EtOAc/hexanes) to give 84.8 mg (59% yield) of the title compound as a white solid.

**IR** (Neat): 3516, 3280, 2958, 1597, 1499, 1323, 1260, 1152, 1081, 833, 558  $\text{cm}^{-1}$ ;  
 **$^1\text{H}$  NMR** (500 MHz,  $\text{CDCl}_3$ )  $\delta$  7.82-7.78 (m, 2H), 7.00-6.96 (m, 2H), 3.88 (s, 3H), 3.35-3.32 (m, 1H), 3.19-3.16 (m, 1H), 2.76-2.71 (m, 1H), 0.86 (s, 9H);  
 **$^{13}\text{C}$  NMR** (126 MHz,  $\text{CDCl}_3$ )  $\delta = 162.91, 131.30, 129.21, 114.32, 78.05, 55.64, 44.70, 34.07, 25.56$ ;  
**HRMS** (ESI) exact mass calculated for [M] ( $\text{C}_{13}\text{H}_{21}\text{NO}_4\text{S}$ ) from  $[\text{M}+\text{H}]^+$  requires  $m/z$  287.11913, found  $m/z$  287.11895, difference 0.63 ppm.

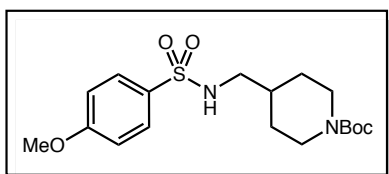

*tert*-butyl 4-(((4-methoxyphenyl)sulfonamido)methyl)piperidine-1-carboxylate

The reaction was set up following general procedure C with 4-methoxybenzenesulfonamide (94 mg, 0.5 mmol) and *tert*-butyl 4-methylenepiperidine-1-carboxylate (296 mg, 1.5 mmol) for 36 hours. Upon completion, the crude product was purified using silica column chromatography (gradient 100% hexanes to 25% EtOAc/hexanes) to give 163.0 mg (85% yield) of the title compound as a colorless oil.

**IR** (Neat): 3293, 2927, 1665, 1597, 1423, 1256, 1150, 1094, 1024, 833, 668  $\text{cm}^{-1}$ ;  
 **$^1\text{H}$  NMR** (500 MHz,  $\text{CDCl}_3$ )  $\delta$  7.81-7.77 (m, 2H), 7.00-6.96 (m, 2H), 4.94 (br, 1H), 4.06 (d,  $J = 15$  Hz, 2H), 3.88 (s, 3H), 2.80-2.77 (m, 2H), 2.65-2.59 (m, 2H), 1.66-1.55 (m, 3H), 1.43 (s, 9H), 1.08-0.99 (m, 2H);

$^{13}\text{C}$  NMR (126 MHz,  $\text{CDCl}_3$ )  $\delta$  = 162.87, 154.73, 131.45, 129.15, 114.27, 79.47, 55.64, 48.51, 43.42, 36.37, 29.57, 28.43;

HRMS (ESI) exact mass calculated for  $[\text{M}-\text{C}_4\text{H}_8]$  ( $\text{C}_{14}\text{H}_{20}\text{N}_2\text{O}_5\text{S}$ ) from  $[\text{M}-\text{C}_4\text{H}_8+\text{H}]^+$  requires  $m/z$  328.10929, found  $m/z$  328.10956, difference 0.81 ppm.

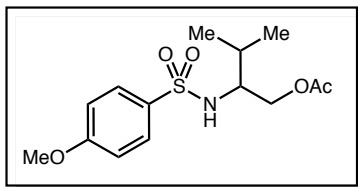

#### 2-((4-methoxyphenyl)sulfonamido)-3-methylbutyl acetate

The reaction was set up following general procedure C with 4-methoxybenzenesulfonamide (94 mg, 0.5 mmol) and 3-methylbut-2-en-1-yl acetate (192 mg, 1.5 mmol) for 36 hours. Upon completion, the crude product was purified using silica column chromatography (gradient 100% hexanes to 40% EtOAc/hexanes) to give 70.8 mg (45% yield) of the title compound as a colorless oil.

IR (Neat): 3283, 2966, 1735, 1597, 1498, 1325, 1255, 1152, 1093, 1025, 834, 671  $\text{cm}^{-1}$ ;

$^1\text{H}$  NMR (500 MHz,  $\text{CDCl}_3$ )  $\delta$  7.83-7.79 (m, 2H), 6.99-6.95 (m, 2H), 4.83 (br, 1H), 4.05-4.02 (m, 1H), 3.93-3.90 (m, 1H), 3.88 (s, 3H), 3.31-3.26 (m, 1H), 1.93 (s, 3H), 1.85-1.78 (m, 1H), 0.88-0.84 (m, 6H);

$^{13}\text{C}$  NMR (126 MHz,  $\text{CDCl}_3$ )  $\delta$  = 170.91, 162.79, 132.73, 129.14, 114.15, 64.07, 57.86, 55.62, 29.94, 20.74, 18.87, 18.22;

HRMS (ESI) exact mass calculated for  $[\text{M}]$  ( $\text{C}_{14}\text{H}_{21}\text{NO}_5\text{S}$ ) from  $[\text{M}+\text{H}]^+$  requires  $m/z$  315.11404, found  $m/z$  315.11379, difference 0.80 ppm.

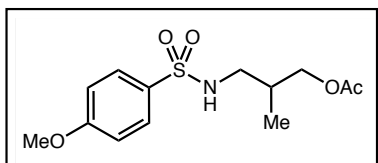

#### 3-((4-methoxyphenyl)sulfonamido)-2-methylpropyl acetate

The reaction was set up following general procedure C with 4-methoxybenzenesulfonamide (94 mg, 0.5 mmol) and 2-methylallyl acetate (171 mg, 1.5 mmol) for 36 hours. Upon completion, the crude product was purified using silica column chromatography (gradient 100% hexanes to 40% EtOAc/hexanes) to give 101 mg (67% yield) of the title compound as a colorless oil.

IR (Neat): 3280, 2967, 1726, 1597, 1498, 1324, 1251, 1150, 1094, 1025, 833, 668  $\text{cm}^{-1}$ ;

$^1\text{H}$  NMR (500 MHz,  $\text{CDCl}_3$ )  $\delta$  7.82-7.78 (m, 2H), 7.00-6.96 (m, 2H), 5.07 (br, 1H), 4.03-3.98 (m, 1H), 3.92-3.87 (m, 4H), 2.87-2.83 (m, 2H), 2.02-1.94 (m, 4H), 0.92 (d,  $J$  = 7.0 Hz, 3H);

$^{13}\text{C}$  NMR (126 MHz,  $\text{CDCl}_3$ )  $\delta$  = 171.22, 162.84, 131.44, 129.17, 114.25, 66.29, 55.63, 45.69, 33.09, 20.84, 14.60;

HRMS (ESI) exact mass calculated for  $[\text{M}]$  ( $\text{C}_{13}\text{H}_{19}\text{NO}_5\text{S}$ ) from  $[\text{M}+\text{H}]^+$  requires  $m/z$  301.09839, found  $m/z$  301.09830, difference 0.31 ppm.

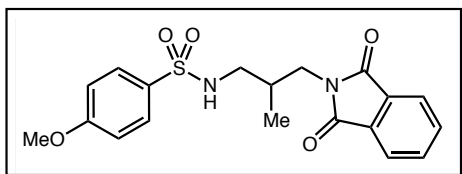

#### N-(3-(1,3-dioxoisindolin-2-yl)-2-methylpropyl)-4-methoxybenzenesulfonamide

The reaction was set up following general procedure C with 4-methoxybenzenesulfonamide



(94 mg, 0.5 mmol) and 2-(2-methylallyl)isoindoline-1,3-dione (302 mg, 1.5 mmol) for 36 hours. Upon completion, the crude product was purified using silica column chromatography (gradient 100% hexanes to 50% EtOAc/hexanes) to give 150.5 mg (78% yield) of the title compound as a colorless oil.

**IR** (Neat): 3284, 2937, 1703, 1596, 1399, 1326, 1257, 1151, 1049, 911, 833, 723  $\text{cm}^{-1}$ ;  
 **$^1\text{H}$  NMR** (500 MHz,  $\text{CDCl}_3$ )  $\delta$  7.84-7.78 (m, 4H), 7.75-7.71 (m, 2H), 6.96-6.93 (m, 2H), 5.52 (br, 1H), 3.84 (s, 3H), 3.66-3.57 (m, 2H), 2.82-2.72 (m, 2H), 2.12-2.07 (m, 1H), 0.96 (d,  $J = 7.0$  Hz, 3H);  
 **$^{13}\text{C}$  NMR** (126 MHz,  $\text{CDCl}_3$ )  $\delta = 168.94, 162.68, 134.24, 131.72, 129.12, 123.42, 114.16, 55.59, 45.71, 40.35, 33.57, 15.63$ ;  
**HRMS** (ESI) exact mass calculated for [M] ( $\text{C}_{19}\text{H}_{20}\text{N}_2\text{O}_5\text{S}$ ) from  $[\text{M}+\text{H}]^+$  requires  $m/z$  388.10929, found  $m/z$  388.10941, difference 0.29 ppm.

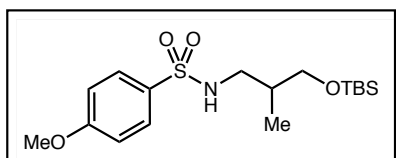

*N*-(3-((*tert*-butyldimethylsilyloxy)-2-methylpropyl)-4-methoxybenzenesulfonamide

The reaction was set up following general procedure C with 4-methoxybenzenesulfonamide (94 mg, 0.5 mmol) and *tert*-butyldimethyl((2-methylallyl)oxy)silane (280 mg, 1.5 mmol) for 36 hours. Upon completion, the crude product was purified using silica column chromatography (gradient 100% hexanes to 20% EtOAc/hexanes) to give 148.8 mg (80% yield) of the title compound as a colorless oil.

**IR** (Neat): 3286, 2930, 2857, 1598, 1498, 1256, 1153, 1094, 832, 776, 667  $\text{cm}^{-1}$ ;  
 **$^1\text{H}$  NMR** (500 MHz,  $\text{CDCl}_3$ )  $\delta$  7.81-7.77 (m, 4H), 6.99-6.95 (m, 2H), 5.34 (br, 1H), 3.87 (s, 3H), 3.59-3.56 (m, 1H), 3.37-3.33 (m, 1H), 3.00-2.95 (m, 1H), 2.89-2.83 (m, 1H), 1.87-1.78 (m, 1H), 0.88 (s, 9H), 0.82 (d,  $J = 6.5$  Hz, 3H), 0.03-0.02 (m, 6H);  
 **$^{13}\text{C}$  NMR** (126 MHz,  $\text{CDCl}_3$ )  $\delta = 162.68, 131.66, 129.16, 114.13, 67.98, 55.59, 48.20, 34.77, 25.85, 18.13, 14.52, -5.61$ ;  
**HRMS** (ESI) exact mass calculated for [M] ( $\text{C}_{17}\text{H}_{31}\text{NO}_4\text{SSi}$ ) from  $[\text{M}+\text{H}]^+$  requires  $m/z$  373.17431, found  $m/z$  373.17470, difference 1.05 ppm.

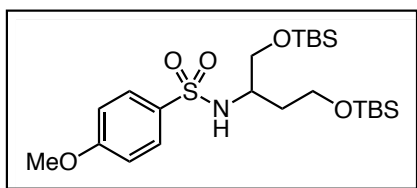

4-methoxy-*N*-(2,2,3,3,10,10,11,11-octamethyl-4,9-dioxa-3,10-disiladodecan-6-yl)benzenesulfonamide

The reaction was set up following general procedure C with 4-methoxybenzenesulfonamide (94 mg, 0.5 mmol) and 2,2,3,3,10,10,11,11-octamethyl-4,9-dioxa-3,10-disiladodec-6-ene (475 mg, 1.5 mmol) for 36 hours. Upon completion, the crude product was purified using silica column chromatography (gradient hexanes to 25% EtOAc/hexanes) to give 120.4 mg (48% yield) of the title compound as a colorless liquid.

**IR** (Neat): 3282, 2954, 2929, 2884, 1598, 1499, 1302, 1256, 1157, 1088, 832, 776  $\text{cm}^{-1}$ ;

**<sup>1</sup>H NMR** (500 MHz, CDCl<sub>3</sub>) δ = 7.81-7.78 (m, 2H), 6.97-6.94 (m, 2H), 5.37 (d, *J* = 7.0 Hz, 1H), 3.87 (s, 3H), 3.69-3.64 (m, 1H), 3.61-3.59 (m, 1H), 3.56-3.52 (m, 1H), 3.48-3.45 (m, 1H), 3.38-3.32 (m, 1H), 1.67-1.63 (m, 2H), 0.88 (s, 9H), 0.84 (s, 9H), 0.02 (s, 6H), -0.01 (s, 3H), -0.02 (s, 3H);

**<sup>13</sup>C NMR** (126 MHz, CDCl<sub>3</sub>) δ = 162.68, 132.54, 129.19, 114.10, 64.28, 60.10, 55.58, 53.36, 33.59, 25.84, 18.15, -5.4;

**HRMS** (ESI) exact mass calculated for [M] (C<sub>23</sub>H<sub>45</sub>NO<sub>5</sub>SSi) from [M+H]<sup>+</sup> requires *m/z* 503.25570, found *m/z* 503.25469, difference 2.00 ppm.

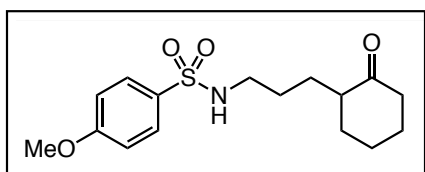

4-methoxy-N-(3-(2-oxocyclohexyl)propyl)benzenesulfonamide

The reaction was set up following general procedure C with 4-methoxybenzenesulfonamide (94 mg, 0.5 mmol) and 2-allylcyclohexanone (207 mg, 1.5 mmol) for 36 hours. Upon completion, the crude product was purified using silica column chromatography (gradient hexanes to 40% EtOAc/hexanes) to give 84.6 mg (52% yield) of the title compound as a colorless liquid.

**IR** (Neat): 3275, 2935, 1701, 1596, 1498, 1324, 1257, 1151, 1094, 1024, 833, 729cm<sup>-1</sup>;

**<sup>1</sup>H NMR** (500 MHz, CDCl<sub>3</sub>) δ = 7.82 – 7.76 (m, 2H), 7.00 – 6.94 (m, 2H), 4.78 (br, 1H), 3.87 (s, 3H), 2.96 – 2.82 (m, 2H), 2.39 – 2.32 (m, 1H), 2.30 – 2.17 (m, 2H), 2.08 – 2.00 (m, 2H), 1.85 – 1.60 (m, 4H), 1.50 – 1.42 (m, 2H), 1.36 – 1.28 (m, 1H), 1.22 – 1.14 (m, 1H).

**<sup>13</sup>C NMR** (126 MHz, CDCl<sub>3</sub>) δ = 213.22, 162.78, 131.49, 129.21, 114.20, 55.63, 50.19, 43.16, 42.10, 34.17, 28.03, 27.20, 26.32, 25.02.;

**HRMS** (ESI) exact mass calculated for [M] (C<sub>16</sub>H<sub>23</sub>NO<sub>4</sub>S) from [M+H]<sup>+</sup> requires *m/z* 325.13478, found *m/z* 325.13504, difference 0.79 ppm.

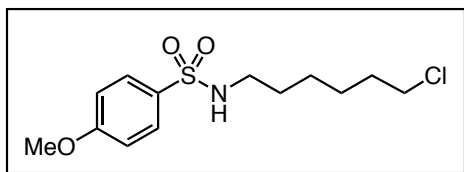

N-(6-chlorohexyl)-4-methoxybenzenesulfonamide

The reaction was set up following general procedure C with 4-methoxybenzenesulfonamide (94 mg, 0.5 mmol) and 6-chlorohex-1-ene (178 mg, 1.5 mmol) for 36 hours. Upon completion, the crude product was purified using silica column chromatography (gradient hexanes to 25% EtOAc/hexanes) to give 76.2 mg (50% yield) of the title compound as a colorless liquid.

**IR** (Neat): 3281, 2937, 1597, 1498, 1322, 1259, 1151, 1094, 1025, 834cm<sup>-1</sup>;

**<sup>1</sup>H NMR** (500 MHz, CDCl<sub>3</sub>) δ = 7.85 – 7.77 (m, 2H), 7.01 – 6.96 (m, 2H), 4.66 (s, 1H), 3.88 (s, 3H), 3.49 (t, *J* = 6.7 Hz, 2H), 2.92 (q, *J* = 6.8 Hz, 2H), 1.74 – 1.68 (m, 2H), 1.51 – 1.43 (m, 2H), 1.40 – 1.34 (m, 2H), 1.32 – 1.26 (m, 2H).

**<sup>13</sup>C NMR** (126 MHz, CDCl<sub>3</sub>) δ = 162.84, 131.46, 129.20, 114.25, 55.64, 44.91, 43.00, 32.32, 29.37, 26.30, 25.78.

**HRMS** (ESI) exact mass calculated for [M] (C<sub>13</sub>H<sub>20</sub>ClNO<sub>3</sub>S) from [M+H]<sup>+</sup> requires m/z 305.08524, found m/z 305.08501, difference 0.76 ppm.

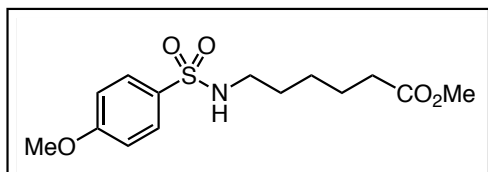

methyl 6-((4-methoxyphenyl)sulfonamido)hexanoate

The reaction was set up following general procedure C with 4-methoxybenzenesulfonamide (94 mg, 0.5 mmol) and methyl hex-5-enoate (192 mg, 1.5 mmol) for 36 hours. Upon completion, the crude product was purified using silica column chromatography (gradient hexanes to 25% EtOAc/hexanes) to give 80.2 mg (51% yield) of the title compound as a light-yellow liquid.

**IR** (Neat): 3293, 2950, 1729, 1597, 1258, 1151, 1067, 834cm<sup>-1</sup>;

**<sup>1</sup>H NMR** (500 MHz, CDCl<sub>3</sub>) δ = 7.84 – 7.79 (m, 2H), 7.00 (d, *J* = 8.9 Hz, 2H), 4.51 (s, 1H), 3.89 (s, 3H), 3.68 (s, 3H), 2.94 (q, *J* = 6.8 Hz, 2H), 2.28 (t, *J* = 7.4 Hz, 2H), 1.63 – 1.54 (m, 2H), 1.54 – 1.45 (m, 2H), 1.35 – 1.28 (m, 2H).

**<sup>13</sup>C NMR** (126 MHz, CDCl<sub>3</sub>) δ = 173.95, 162.84, 131.50, 129.20, 114.24, 55.62, 51.57, 42.90, 33.74, 29.20, 25.98, 24.23.

**HRMS** (ESI) exact mass calculated for [M] (C<sub>14</sub>H<sub>21</sub>NO<sub>5</sub>S) from [M+H]<sup>+</sup> requires m/z 315.11404, found m/z 315.11359, difference 1.45 ppm.

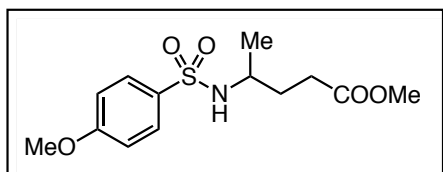

methyl 4-((4-methoxyphenyl)sulfonamido)pentanoate

The reaction was set up following general procedure C with 4-methoxybenzenesulfonamide (94 mg, 0.5 mmol) and (E)-methyl pent-3-enoate (171 mg, 1.5 mmol) for 36 hours. Upon completion, the crude product was purified using silica column chromatography (gradient hexanes to 25% EtOAc/hexanes) to give 66.4 mg (44% yield) of the mixture of the title compound (major) and the other regioisomer (minor) shown below as a colorless liquid. The ratio of the regioisomers was determined by crude HNMR.

**IR** (Neat): 3286, 2962, 1732, 1597, 1499, 1328, 1259, 1153, 1094, 1022, 836cm<sup>-1</sup>;

**<sup>1</sup>H NMR** (500 MHz, CDCl<sub>3</sub>) δ = 7.85 – 7.78 (m, 2H), 7.01 – 6.96 (m, 2H), 4.55 (d, *J* = 8.0 Hz, 1H), 3.89 (s, 3H), 3.66 (s, 3H), 3.41 – 3.30 (m, 1H), 2.38 – 2.32 (m, 2H), 1.80 – 1.73 (m, 1H), 1.70 – 1.64 (m, 2H), 1.04 (d, *J* = 6.5 Hz, 3H).

**<sup>13</sup>C NMR** (126 MHz, CDCl<sub>3</sub>) δ = 173.93, 162.76, 132.60, 129.11, 114.20, 55.61, 51.72, 49.56, 32.07, 30.22, 21.89.

**HRMS** (ESI) exact mass calculated for [M] (C<sub>13</sub>H<sub>19</sub>NO<sub>5</sub>S) from [M+H]<sup>+</sup> requires m/z 301.09839, found m/z 301.09784, difference 1.85 ppm.

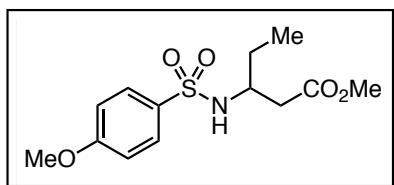

methyl 3-((4-methoxyphenyl)sulfonamido)pentanoate

**IR** (Neat): 3278, 2957, 1733, 1597, 1499, 1323, 1259, 1154, 836 $\text{cm}^{-1}$ ;  
 **$^1\text{H}$  NMR** (500 MHz,  $\text{CDCl}_3$ )  $\delta$  = 7.83 – 7.79 (m, 2H), 6.99 – 6.95 (m, 2H), 5.13 (d,  $J$  = 9.9 Hz, 1H), 3.87 (s, 3H), 3.62 (s, 3H), 3.46 – 3.39 (m, 1H), 2.49 – 2.36 (m, 2H), 1.55 – 1.46 (m, 2H), 0.80 (t,  $J$  = 7.4 Hz, 3H).  
 **$^{13}\text{C}$  NMR** (126 MHz,  $\text{CDCl}_3$ )  $\delta$  = 171.81, 162.78, 132.61, 129.16, 114.17, 55.61, 52.12, 51.76, 38.19, 27.76, 10.36.  
**HRMS** (ESI) exact mass calculated for [M] ( $\text{C}_{13}\text{H}_{19}\text{NO}_5\text{S}$ ) from  $[\text{M}+\text{H}]^+$  requires  $m/z$  301.09839, found  $m/z$  301.09780, difference 1.97 ppm.

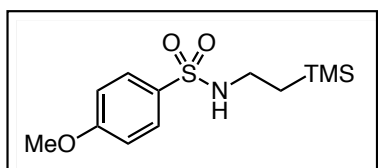

4-methoxy-N-(2-(trimethylsilyl)ethyl)benzenesulfonamide

The reaction was set up following general procedure C with 4-methoxybenzenesulfonamide (94 mg, 0.5 mmol) and trimethyl(vinyl)silane (150 mg, 1.5 mmol) for 36 hours. Upon completion, the crude product was purified using silica column chromatography (gradient hexanes to 25% EtOAc/hexanes) to give 60.2 mg (42% yield) of the title compound as a colorless liquid.

**IR** (Neat): 3280, 2953, 1597, 1498, 1255, 1151, 1096, 832 $\text{cm}^{-1}$ ;  
 **$^1\text{H}$  NMR** (500 MHz,  $\text{CDCl}_3$ )  $\delta$  = 7.84 – 7.80 (m, 2H), 7.03 – 6.97 (m, 2H), 4.46 (s, 1H), 3.89 (s, 3H), 3.03 – 2.96 (m, 2H), 0.79 – 0.73 (m, 2H), -0.02 (s, 9H).  
 **$^{13}\text{C}$  NMR** (126 MHz,  $\text{CDCl}_3$ )  $\delta$  = 164.49, 133.24, 130.88, 115.90, 57.30, 41.58, 19.59, -0.00.  
**HRMS** (ESI) exact mass calculated for [M] ( $\text{C}_{12}\text{H}_{21}\text{NO}_3\text{SSi}$ ) from  $[\text{M}+\text{H}]^+$  requires  $m/z$  287.10114, found  $m/z$  287.10115, difference 0.03 ppm.

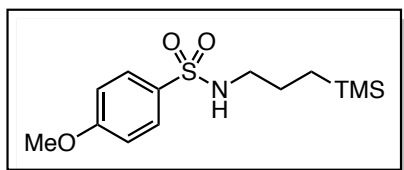

4-methoxy-N-(3-(trimethylsilyl)propyl)benzenesulfonamide

The reaction was set up following general procedure C with 4-methoxybenzenesulfonamide (94 mg, 0.5 mmol) and allyltrimethylsilane (171 mg, 1.5 mmol) for 36 hours. Upon completion, the crude product was purified using silica column chromatography (gradient hexanes to 25% EtOAc/hexanes) to give 74.4 mg (49% yield) of the title compound as a colorless liquid.

**IR** (Neat): 3281, 2952, 1597, 1498, 1324, 1254, 1151, 1096, 832 $\text{cm}^{-1}$ ;  
 **$^1\text{H}$  NMR** (500 MHz,  $\text{CDCl}_3$ )  $\delta$  = 7.88 – 7.81 (m, 2H), 7.08 – 6.97 (m, 2H), 4.66 (s, 1H), 3.91 (s, 3H), 2.94 (q,  $J$  = 6.8 Hz, 2H), 1.51 – 1.41 (m, 2H), 0.48 – 0.37 (m, 2H), -0.03 (s, 9H).  
 **$^{13}\text{C}$  NMR** (126 MHz,  $\text{CDCl}_3$ )  $\delta$  = 164.65, 133.59, 131.04, 116.06, 57.47, 48.12, 26.12, 15.39, -0.00.  
**HRMS** (ESI) exact mass calculated for [M] ( $\text{C}_{13}\text{H}_{24}\text{NO}_3\text{SSi}$ ) from  $[\text{M}+\text{H}]^+$  requires  $m/z$  301.11679, found  $m/z$  301.11634, difference 1.5 ppm.

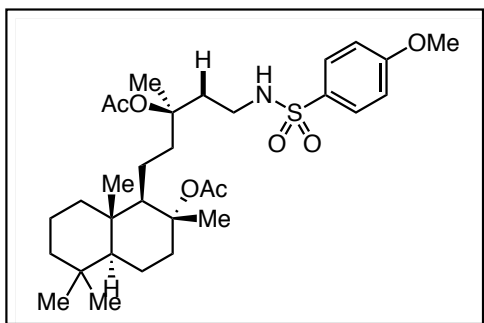

(R)-1-((1R,2R,4aS,8aS)-2-acetoxy-2,5,5,8a-tetramethyldecahydronaphthalen-1-yl)-5-((4-methoxyphenyl)sulfonamido)-3-methylpentan-3-yl acetate

The reaction was set up following general procedure C with 4-methoxybenzenesulfonamide (94 mg, 0.5 mmol) and (R)-5-((1R,2R,4aS,8aS)-2-acetoxy-2,5,5,8a-tetramethyldecahydronaphthalen-1-yl)-3-methylpentan-3-yl acetate (393 mg, 1.0 mmol) for 48 hours. Upon completion, the crude product was purified using silica column chromatography (gradient 100% hexanes to 35% EtOAc/hexanes) to give 144.8 mg (50% yield) of the title compound as a colorless oil.

**IR** (Neat): 3276, 2937, 2874, 1722, 1598, 1367, 1252, 1154, 1021, 834, 732  $\text{cm}^{-1}$ ;  
 **$^1\text{H}$  NMR** (500 MHz,  $\text{CDCl}_3$ )  $\delta$  = 7.81-7.78 (m, 2H), 7.00-6.97 (m, 2H), 4.73 (br, 1H), 3.88 (s, 3H), 3.04-2.95 (m, 2H), 2.66-2.62 (m, 1H), 2.07-1.99 (m, 2H), 1.94-1.81 (m, 7H), 1.71-1.62 (m, 3H), 1.59-1.50 (m, 2H), 1.43-1.36 (m, 9H), 1.30-1.10 (m, 4H), 0.96-0.88 (m, 2H), 0.86 (s, 3H), 0.80 (s, 3H), 0.77 (s, 3H);  
 **$^{13}\text{C}$  NMR** (126 MHz,  $\text{CDCl}_3$ )  $\delta$  = 170.28, 170.08, 162.87, 131.42, 129.18, 114.26, 87.86, 83.61, 58.79, 55.63, 55.60, 41.82, 41.16, 39.40, 39.34, 38.76, 38.74, 38.01, 33.30, 33.08, 23.64, 22.87, 22.32, 21.38, 20.37, 19.93, 19.55, 18.31, 15.76;  
**HRMS** (ESI) exact mass calculated for  $[\text{M}]$  ( $\text{C}_{31}\text{H}_{49}\text{NO}_7\text{S}$ ) from  $[\text{M}+\text{H}]^+$  requires  $m/z$  579.32379, found  $m/z$  579.32297, difference 1.42 ppm.

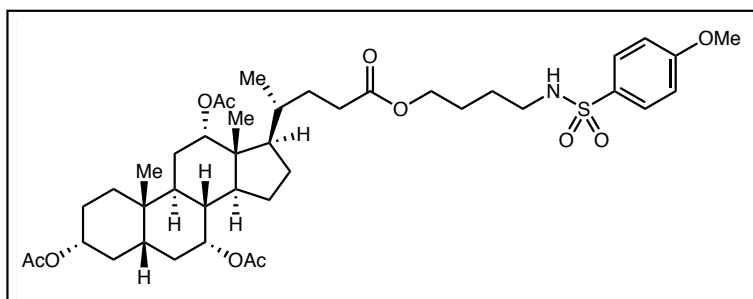

(3R,5S,7R,8R,9S,10S,12S,13R,14S,17R)-17-((R)-5-(4-((4-methoxyphenyl)sulfonamido)butoxy)-5-oxopentan-2-yl)-10,13-dimethylhexadecahydro-1H-cyclopenta[a]phenanthrene

-3,7,12-triyl triacetate

The reaction was set up following general procedure C with 4-methoxybenzenesulfonamide (94 mg, 0.5 mmol) and (3R,5S,7R,8R,9S,10S,12S,13R,14S,17R)-17-((R)-5-(but-3-en-1-yloxy)-5-oxopentan-2-yl)-10,13-dimethylhexadecahydro-1H-cyclopenta[a]phenanthrene-3,7,12-triyl triacetate (589 mg, 1.0 mmol) for 48 hours. Upon completion, the crude product was purified using silica column chromatography (gradient hexanes to 45% EtOAc/hexanes) to give 181.8 mg (47% yield) of the title compound as a colorless liquid.

**IR** (Neat): 3281, 2946, 1726, 1597, 1377, 1243, 1155, 1024, 915, 731  $\text{cm}^{-1}$ ;

**<sup>1</sup>H NMR** (500 MHz, CDCl<sub>3</sub>) δ = 7.82-7.78 (m, 2H), 6.99-6.96 (m, 2H), 5.09 (t, *J* = 3.0 Hz, 1H), 4.91 (d, *J* = 3.0 Hz, 1H), 4.73-4.69 (m, 1H), 4.61-4.55 (m, 1H), 4.01 (t, *J* = 6.5 Hz, 1H), 3.88 (s, 3H), 2.95 (q, *J* = 6.5 Hz, 2H), 2.34-2.27 (m, 1H), 2.21-2.14 (m, 4H), 2.09-1.84 (m, 11H), 1.80-1.49 (m, 14H), 1.45-1.23 (m, 5H), 1.15-1.04 (m, 2H), 0.92 (s, 3H), 0.81 (d, *J* = 6.5 Hz, 3H), 0.73 (s, 3H);

**<sup>13</sup>C NMR** (126 MHz, CDCl<sub>3</sub>) δ = 174.10, 170.61, 170.43, 162.86, 131.42, 129.16, 75.37, 74.10, 70.71, 63.61, 55.64, 47.38, 45.08, 43.38, 42.74, 40.93, 37.72, 34.69, 34.61, 34.57, 34.34, 31.25, 31.10, 30.71, 28.90, 27.13, 26.90, 26.26, 25.75, 25.60, 22.81, 22.58, 21.66, 21.53, 21.49, 17.55, 12.26;

**HRMS** (ESI) exact mass calculated for [M] (C<sub>41</sub>H<sub>61</sub>NO<sub>11</sub>S) from [M+Na]<sup>+</sup> requires *m/z* 775.39653, found *m/z* 775.39572, difference 1.04 ppm.

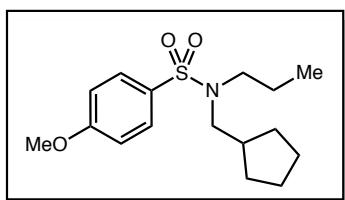

*N*-(cyclopentylmethyl)-4-methoxy-*N*-propylbenzenesulfonamide

The reaction was set up following general procedure C with 4-methyl-*N*-propylbenzenesulfonamide (115 mg, 0.5 mmol) and methylenecyclopentene (123 mg, 1.5 mmol) for 36 hours. Upon completion, the crude product was purified using silica column chromatography (gradient 100% hexanes to 20% EtOAc/hexanes) to give 88.5 mg (57% yield) of the title compound as a colorless oil.

**IR** (Neat): 2957, 1596, 1497, 1341, 1258, 1253, 1096, 1025, 804, 670 cm<sup>-1</sup>;

**<sup>1</sup>H NMR** (500 MHz, CDCl<sub>3</sub>) δ 7.75-7.72 (m, 2H), 6.98-6.95 (m, 2H), 3.86 (s, 3H), 3.05-3.02 (m, 2H), 2.99 (d, *J* = 7.5 Hz, 2H), 2.18-2.09 (m, 1H), 1.74-1.64 (m, 2H), 1.68-1.49 (m, 6H), 1.26-1.19 (m, 2H), 0.85 (t, *J* = 7.5 Hz, 3H);

**<sup>13</sup>C NMR** (126 MHz, CDCl<sub>3</sub>) δ = 162.50, 131.74, 129.18, 114.03, 55.57, 53.32, 50.30, 38.58, 30.39, 25.04, 22.02, 11.31;

**HRMS** (ESI) exact mass calculated for [M] (C<sub>16</sub>H<sub>25</sub>NO<sub>3</sub>S) from [M+H]<sup>+</sup> requires *m/z* 311.15551, found *m/z* 311.15563, difference 0.37 ppm.

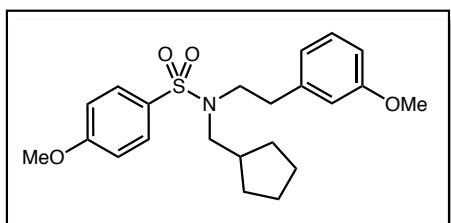

*N*-(cyclopentylmethyl)-4-methoxy-*N*-(3-methoxyphenethyl)benzenesulfonamide

The reaction was set up following general procedure C with 4-methoxy-*N*-(3-methoxyphenethyl)benzenesulfonamide (161 mg, 0.5 mmol) and methylenecyclopentane (123 mg, 1.5 mmol) for 48 hours. Upon completion, the crude product was purified using silica column chromatography (gradient hexanes to 35% EtOAc/hexanes) to give 106.8 mg (53% yield) of the title compound as a colorless oil.

**IR** (Neat): 2948, 1597, 1495, 1336, 1258, 1151, 1093, 807 cm<sup>-1</sup>;

**<sup>1</sup>H NMR** (500 MHz, CDCl<sub>3</sub>) δ = 7.75-7.72 (m, 2H), 7.19 (t, *J* = 8.0 Hz, 1H), 6.97-6.94 (m, 2H), 6.76-6.74 (m, 2H), 6.70-6.69 (m, 1H), 3.85 (s, 3H), 3.79 (s, 3H), 3.31-3.27 (m, 2H), 3.04 (d, *J* = 7.5 Hz, 2H), 2.84-2.80 (m, 2H), 2.19-2.10 (m, 1H), 1.74-1.50 (m, 6H), 1.28-1.21 (m, 2H);

**<sup>13</sup>C NMR** (126 MHz, CDCl<sub>3</sub>) δ = 162.63, 159.73, 140.31, 131.48, 129.57, 129.22, 121.08, 114.57, 114.15, 111.70, 55.59, 55.21, 53.53, 50.05, 38.53, 35.76, 30.40, 25.06;  
**HRMS** (ESI) exact mass calculated for [M] (C<sub>22</sub>H<sub>30</sub>NO<sub>4</sub>S) from [M+H]<sup>+</sup> requires m/z 403.18173, found m/z 403.18159, difference 0.33 ppm.

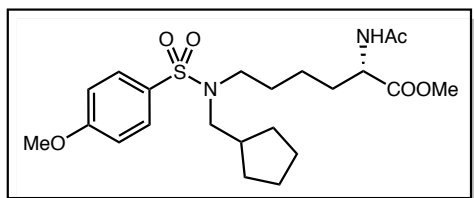

methyl N2-acetyl-N6-(cyclopentylmethyl)-N6-((4-methoxyphenyl)sulfonyl)-L-lysinate

The reaction was set up following general procedure C with methyl N2-acetyl-N6-tosyl-L-lysinate (186 mg, 0.5 mmol) and methylenecyclopentane (123 mg, 1.5 mmol) for 48 hours. Upon completion, the crude product was purified using silica column chromatography (gradient 10% EtOAc/hexanes to 70% EtOAc/hexanes) to give 104.2 mg (46% yield) of the title compound as a colorless oil.

**IR** (Neat): 3297, 2950, 1743, 1659, 1597, 1497, 1334, 1258, 1152, 1093, 806 cm<sup>-1</sup>;  
**<sup>1</sup>H NMR** (500 MHz, CDCl<sub>3</sub>) δ = 7.73-7.70 (m, 2H), 6.98-6.95 (m, 2H), 6.24 (d, *J* = 7.5 Hz, 1H), 4.57-4.53 (m, 1H), 3.87 (s, 3H), 3.75 (s, 3H), 3.13-2.91 (m, 4H), 2.14-2.08 (m, 1H), 2.03 (s, 3H), 1.86-1.79 (m, 1H), 1.73-11.65 (m, 3H), 1.62-1.50 (m, 6H), 1.38-1.31 (m, 2H), 1.25-1.14 (m, 2H);  
**<sup>13</sup>C NMR** (126 MHz, CDCl<sub>3</sub>) δ = 172.95, 170.06, 162.64, 131.23, 129.18, 114.13, 55.60, 53.76, 52.41, 52.13, 48.13, 38.60, 31.64, 30.40, 28.27, 25.02, 23.14, 22.18;  
**HRMS** (ESI) exact mass calculated for [M] (C<sub>22</sub>H<sub>34</sub>N<sub>2</sub>O<sub>6</sub>S) from [M+H]<sup>+</sup> requires m/z 454.21376, found m/z 454.12287, difference 1.95 ppm.

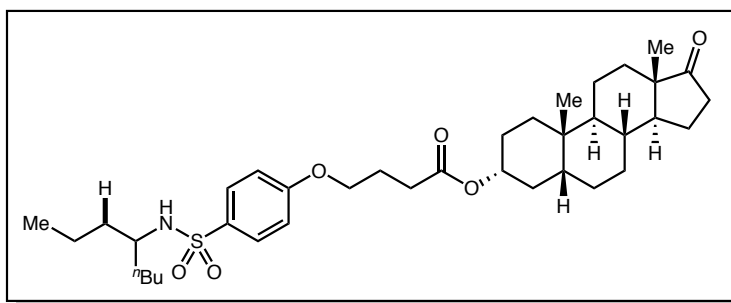

(3R,5R,8R,9S,10S,13S,14S)-10,13-dimethyl-17-oxohexadecahydro-1H-cyclopenta[a]phenanthren-3-yl 4-(4-(N-(octan-4-yl)sulfamoyl)phenoxy)butanoate

The reaction was set up following general procedure C with (3R,5R,8R,9S,10S,13S,14S)-10,13-dimethyl-17-oxohexadecahydro-1H-cyclopenta[a]phenanthren-3-yl 4-(4-sulfamoylphenoxy)butanoate (266 mg, 0.5 mmol) and *cis*-4-octene (168 mg, 1.5 mmol) for 48 hours. Upon completion, the crude product was purified using silica column chromatography (gradient hexanes to 45% EtOAc/hexanes) to give 182.1 mg (57% yield) of the title compound as a colorless liquid.

**IR** (Neat): 3283, 2932, 2859, 1731, 1596, 1498, 1324, 1255, 1154, 1096, 1014, 732 cm<sup>-1</sup>;  
**<sup>1</sup>H NMR** (500 MHz, CDCl<sub>3</sub>) δ = 7.80-7.77 (m, 2H), 6.96-6.93 (m, 2H), 4.75-4.69 (m, 1H), 4.39 (br, 1H), 4.06 (t, *J* = 6.5 Hz, 2H), 3.22-3.15 (m, 1H), 2.51-2.41 (m, 3H), 2.15-

2.03 (m, 3H), 1.96-1.90 (m, 1H), 1.83-1.73 (m, 4H), 1.67-1.46 (m, 5H), 1.41-0.98 (m, 19H), 0.86 (s, 3H), 0.85 (s, 3H), 0.80-0.77 (m, 6H), 0.74-0.69 (m, 1H);

$^{13}\text{C}$  NMR (126 MHz,  $\text{CDCl}_3$ )  $\delta$  = 221.34, 172.51, 161.90, 133.11, 129.08, 114.47, 73.72, 67.17, 54.27, 53.78, 51.34, 47.79, 44.63, 37.21, 36.67, 35.86, 35.64, 35.01, 34.68, 33.97, 31.51, 30.95, 30.79, 28.26, 27.43, 27.35, 24.46, 22.46, 21.78, 20.46, 18.46, 13.95, 13.89, 13.82, 12.22;

**HRMS** (ESI) exact mass calculated for  $[\text{M}]$  ( $\text{C}_{37}\text{H}_{57}\text{NO}_6\text{S}$ ) from  $[\text{M}+\text{Na}]^+$  requires  $m/z$  643.39066, found  $m/z$  643.39002, difference 1.00 ppm.

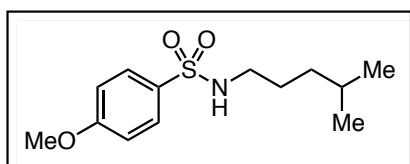

#### 4-methoxy-N-(4-methylpentyl)benzenesulfonamide

The reaction was set up following general procedure C with 4-methoxybenzenesulfonamide (94 mg, 0.5 mmol) and 4-methylpent-1-ene (210 mg, 2.5 mmol, 5.0 eq) for 48 hours. Upon completion, the crude product was purified using silica column chromatography (gradient hexanes to 25% EtOAc/hexanes) to give 100.8 mg (74% yield) of the title compound as a colorless liquid.

**IR** (Neat): 3280, 2954, 1597, 1498, 1322, 1258, 1152, 1095, 1025, 833 $\text{cm}^{-1}$ ;

$^1\text{H}$  NMR (500 MHz,  $\text{CDCl}_3$ )  $\delta$  = 7.85 – 7.77 (m, 2H), 7.01 – 6.94 (m, 2H), 4.62 (br, 1H), 3.87 (s, 3H), 2.95 – 2.85 (m, 2H), 1.53 – 1.38 (m, 3H), 1.18 – 1.06 (m, 2H), 0.82 (s, 3H), 0.81 (s, 3H).

$^{13}\text{C}$  NMR (126 MHz,  $\text{CDCl}_3$ )  $\delta$  = 162.80, 131.60, 129.21, 114.21, 55.62, 43.48, 35.67, 27.58, 27.42, 22.42.

**HRMS** (ESI) exact mass calculated for  $[\text{M}]$  ( $\text{C}_{13}\text{H}_{21}\text{NO}_3\text{S}$ ) from  $[\text{M}+\text{H}]^+$  requires  $m/z$  271.12421, found  $m/z$  271.12397, difference 0.88 ppm.

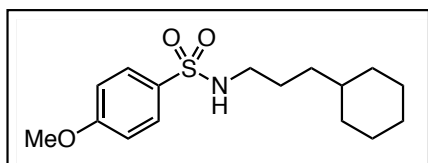

#### N-(3-cyclohexylpropyl)-4-methoxybenzenesulfonamide

The reaction was set up following general procedure C with 4-methoxybenzenesulfonamide (94 mg, 0.5 mmol) and allylcyclohexane (311 mg, 2.5 mmol) for 48 hours. Upon completion, the crude product was purified using silica column chromatography (gradient hexanes to 25% EtOAc/hexanes) to give 116.7 mg (75% yield) of the title compound as a colorless liquid.

**IR** (Neat): 3279, 2921, 1597, 1498, 1322, 1258, 1151, 1095, 1026, 833 $\text{cm}^{-1}$ ;

$^1\text{H}$  NMR (500 MHz,  $\text{CDCl}_3$ )  $\delta$  = 7.89 – 7.75 (m, 2H), 6.98 (dd,  $J$  = 8.9, 1.8 Hz, 2H), 4.58 (br, 1H), 3.87 (s, 3H), 3.00 – 2.79 (m, 2H), 1.69 – 1.54 (m, 5H), 1.50 – 1.39 (m, 2H), 1.22 – 1.04 (m, 6H), 0.88 – 0.73 (m, 2H).

$^{13}\text{C}$  NMR (126 MHz,  $\text{CDCl}_3$ )  $\delta$  = 162.80, 131.59, 129.22, 114.21, 55.61, 43.51, 37.14, 34.19, 33.19, 26.87, 26.56, 26.26.

**HRMS** (ESI) exact mass calculated for  $[\text{M}]$  ( $\text{C}_{16}\text{H}_{25}\text{NO}_3\text{S}$ ) from  $[\text{M}+\text{H}]^+$  requires  $m/z$  311.15551, found  $m/z$  311.15568, difference 0.52 ppm.



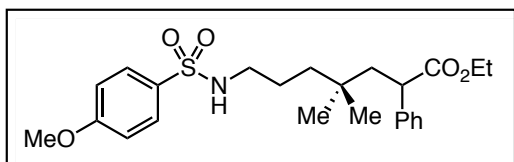

ethyl 7-((4-methoxyphenyl)sulfonamido)-4,4-dimethyl-2-phenylheptanoate

The reaction was set up following general procedure reported in our previous paper<sup>19</sup> with 4-methoxy-N-(4-methylpentyl)benzenesulfonamide (136 mg, 0.5 mmol) and ethyl 2-phenylacrylate (176 mg, 1.0 mmol) for 48 hours. Upon completion, the crude product was purified using silica column chromatography (gradient hexanes to 25% EtOAc/hexanes) to give 185.5 mg (83% yield) of the title compound as a colorless liquid.

**IR** (Neat):  $\text{cm}^{-1}$  3282, 2956, 1729, 1597, 1498, 1326, 1259, 1153, 1096, 1025, 834;  
**<sup>1</sup>H NMR** (500 MHz,  $\text{CDCl}_3$ )  $\delta$  = 7.83 – 7.74 (m, 2H), 7.36 – 7.26 (m, 4H), 7.25 – 7.20 (m, 1H), 7.00 – 6.94 (m, 2H), 4.52 (br, 1H), 4.15 – 4.01 (m, 2H), 3.86 (s, 3H), 3.57 (dd,  $J$  = 9.0, 3.8 Hz, 1H), 2.83 (q,  $J$  = 6.8 Hz, 2H), 2.22 (dd,  $J$  = 14.2, 9.0 Hz, 1H), 1.49 (dd,  $J$  = 14.2, 3.9 Hz, 1H), 1.44 – 1.27 (m, 2H), 1.18 (t,  $J$  = 7.1 Hz, 3H), 1.15 – 1.05 (m, 2H), 0.81 (s, 3H), 0.80 (s, 3H).

**<sup>13</sup>C NMR** (126 MHz,  $\text{CDCl}_3$ )  $\delta$  = 174.73, 162.81, 140.84, 131.53, 129.22, 128.64, 127.76, 127.07, 114.21, 60.92, 55.62, 47.71, 44.88, 43.82, 38.76, 33.24, 27.08, 24.20, 14.05.

**HRMS** (ESI) exact mass calculated for [M] ( $\text{C}_{24}\text{H}_{33}\text{NO}_5\text{S}$ ) from  $[\text{M}+\text{Na}]^+$  requires  $m/z$  447.20794, found  $m/z$  447.20785, difference 0.21 ppm.

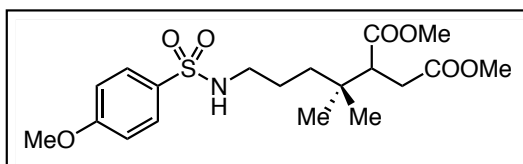

dimethyl 2-(5-((4-methoxyphenyl)sulfonamido)-2-methylpentan-2-yl)succinate

The reaction was set up following general procedure reported in our previous paper<sup>19</sup> with 4-methoxy-N-(4-methylpentyl)benzenesulfonamide (136 mg, 0.5 mmol) and dimethyl fumarate (144 mg, 1.0 mmol) for 48 hours. Upon completion, the crude product was purified using silica column chromatography (gradient hexanes to 50% EtOAc/hexanes) to give 146.2 mg (70% yield) of the title compound as a colorless liquid.

**IR** (Neat):  $\text{cm}^{-1}$  3285, 2955, 1731, 1597, 1499, 1437, 1258, 1152, 1095, 835;  
**<sup>1</sup>H NMR** (500 MHz,  $\text{CDCl}_3$ )  $\delta$  = 7.84 – 7.74 (m, 2H), 7.03 – 6.94 (m, 2H), 4.61 (br, 1H), 3.87 (s, 3H), 3.68 (s, 3H), 3.66 (s, 3H), 2.90 (q,  $J$  = 6.7 Hz, 2H), 2.81 – 2.63 (m, 2H), 2.39 (dd,  $J$  = 16.3, 2.6 Hz, 1H), 1.58 – 1.47 (m, 1H), 1.45 – 1.36 (m, 1H), 1.27 – 1.14 (m, 2H), 0.87 (s, 3H), 0.86 (s, 3H).

**<sup>13</sup>C NMR** (126 MHz,  $\text{CDCl}_3$ )  $\delta$  = 174.41, 173.04, 162.85, 131.48, 129.21, 114.25, 55.63, 51.87, 51.55, 49.29, 43.68, 37.45, 34.86, 32.15, 25.01, 24.81, 24.00.

**HRMS** (ESI) exact mass calculated for [M] ( $\text{C}_{19}\text{H}_{29}\text{NO}_7\text{S}$ ) from  $[\text{M}+\text{Na}]^+$  requires  $m/z$  415.16647, found  $m/z$  415.16661, difference 0.34 ppm.

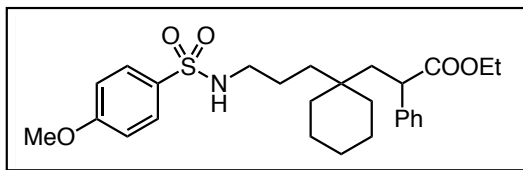

ethyl 3-(1-(3-((4-methoxyphenyl)sulfonamido)propyl)cyclohexyl)-2-phenylpropanoate

The reaction was set up following general procedure reported in our previous paper<sup>19</sup> with N-(3-cyclohexylpropyl)-4-methoxybenzenesulfonamide (156 mg, 0.5 mmol) and ethyl 2-phenylacrylate (176 mg, 1.0 mmol) for 48 hours. Upon completion, the crude product was purified using silica column chromatography (gradient hexanes to 25% EtOAc/hexanes) to give 189.2 mg (78% yield) of the title compound as a colorless liquid.

**IR** (Neat):  $\text{cm}^{-1}$  3281, 2927, 1729, 1597, 1498, 1326, 1258, 1153, 1096, 1027, 834;  
**<sup>1</sup>H NMR** (500 MHz,  $\text{CDCl}_3$ )  $\delta$  = 7.83 – 7.75 (m, 2H), 7.32 – 7.27 (m, 4H), 7.25 – 7.20 (m, 1H), 7.01 – 6.93 (m, 2H), 4.41 (t,  $J$  = 6.0 Hz, 1H), 4.15 – 4.01 (m, 2H), 3.87 (s, 3H), 3.54 (dd,  $J$  = 8.6, 4.0 Hz, 1H), 2.89 – 2.70 (m, 2H), 2.24 (dd,  $J$  = 14.6, 8.6 Hz, 1H), 1.54 (dd,  $J$  = 14.6, 4.0 Hz, 1H), 1.43 – 1.11 (m, 17H).f  
**<sup>13</sup>C NMR** (126 MHz,  $\text{CDCl}_3$ )  $\delta$  = 174.92, 162.78, 140.99, 131.52, 129.23, 128.64, 127.84, 127.08, 114.18, 61.02, 55.62, 46.73, 43.77, 35.80, 35.79, 35.49, 26.19, 22.91, 21.41, 14.05.  
**HRMS** (ESI) exact mass calculated for [M] ( $\text{C}_{27}\text{H}_{37}\text{NO}_5\text{S}$ ) from  $[\text{M}+\text{Na}]^+$  requires  $m/z$  487.23924, found  $m/z$  487.23842, difference 1.69 ppm.

## VI. Mechanistic Studies

### Stern-Volmer Experiments

Stern-Volmer experiments were conducted on an Agilent Technologies Cary Eclipse Fluorescence Spectrophotometer using the Cary Eclipse Scan Application. Rigorously degassed (with argon) solutions of each component were prepared prior to each set of experiments. Because the photocatalyst is poorly soluble in trifluorotoluene, luminescence quenching experiments were run with dichloromethane as the solvent. The solutions were irradiated at 420 nm and luminescence was measured at 593 nm. All the experiments are run in duplicate.  $I^0/I$  values per run are generated from the average of all three scans per data point. For determination of  $K_{sv}$ , the value for  $I^0/I$  from each run is averaged to yield an  $I^0/I$  value for the experiment. Linear regression of  $I^0/I$  against concentration to yield  $K_{sv}$  is done in Microsoft Excel. *N*-propyl-4-methoxybenzenesulfonamide was used as the model amide to study the N-H bond activation step by joint action of the base and photocatalyst.

Experiment 1: Constant photocatalyst; Varied sulfonamide

| Species                                                                        | Concentration |
|--------------------------------------------------------------------------------|---------------|
| [Ir(dFCF <sub>3</sub> ppy) <sub>2</sub> (dCF <sub>3</sub> bpy)]PF <sub>6</sub> | 0.2 mM        |
| Sulfonamide                                                                    | Varied        |

| Run | [Amide] M | Scan 1 | Scan 2 | Scan 3 | Average | I <sub>0</sub> /I |
|-----|-----------|--------|--------|--------|---------|-------------------|
| #1  | 0.000     | 757.1  | 761.3  | 754.7  | 757.7   | 1.00              |
|     | 0.008     | 772.4  | 768.8  | 769.6  | 770.3   | 0.98              |
|     | 0.016     | 765.4  | 767.8  | 776.3  | 769.8   | 0.98              |
|     | 0.024     | 746.3  | 750.8  | 740.8  | 746.0   | 1.02              |
|     | 0.032     | 778.3  | 782.0  | 787.4  | 782.6   | 0.97              |
|     | 0.040     | 742.1  | 742.6  | 741.2  | 742.0   | 1.02              |
| #2  | 0.000     | 759.2  | 756.7  | 760.4  | 758.8   | 1.00              |
|     | 0.008     | 752.2  | 752.8  | 749.1  | 751.4   | 1.01              |
|     | 0.016     | 770.9  | 769.2  | 776.5  | 772.2   | 0.98              |
|     | 0.024     | 768.0  | 765.4  | 769.6  | 767.7   | 0.99              |
|     | 0.032     | 758.3  | 756.5  | 760.5  | 758.4   | 1.00              |
|     | 0.040     | 754.8  | 747.8  | 753.0  | 751.8   | 1.01              |

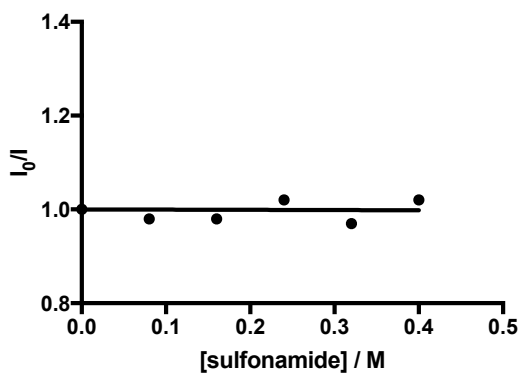

$$y = -0.005x + 1$$

$$r^2 = -0.05$$

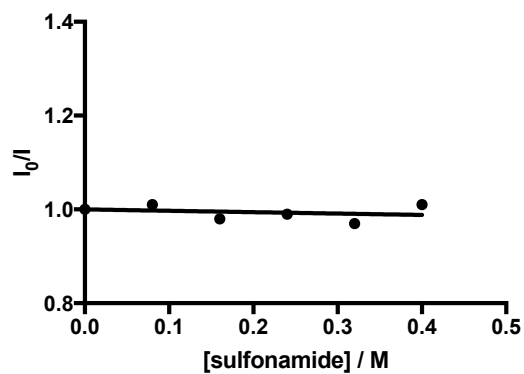

$$y = -0.027x + 1$$

$$r^2 = -0.02$$

Experiment 2: Constant photocatalyst; Constant phosphate; Varied sulfonamide

| Species                                                                     | Concentration |
|-----------------------------------------------------------------------------|---------------|
| $[\text{Ir}(\text{dFCF}_3\text{ppy})_2(\text{dCF}_3\text{bpy})]\text{PF}_6$ | 0.15 mM       |
| $(\text{BuO})_2\text{POONBu}_4$                                             | 1.20 mM       |
| Sulfonamide                                                                 | Varied        |

| Run | Conc. (M) | I(1st) | I(2nd) | I(3rd) | I(average) | $I_0/I$ |
|-----|-----------|--------|--------|--------|------------|---------|
| #1  | 0.000     | 393.5  | 388.4  | 388.9  | 390.3      | 1.00    |
|     | 0.008     | 379.1  | 378.7  | 378.8  | 378.9      | 1.03    |
|     | 0.016     | 370.5  | 369.6  | 368.0  | 369.4      | 1.06    |
|     | 0.024     | 364.6  | 362.1  | 360.7  | 362.5      | 1.08    |
|     | 0.032     | 356.1  | 355.4  | 353.7  | 355.1      | 1.10    |
|     | 0.040     | 348.8  | 345.7  | 345.0  | 346.5      | 1.13    |
| #2  | 0.000     | 392.6  | 388.3  | 389.2  | 390.0      | 1.00    |
|     | 0.008     | 381.2  | 377.9  | 377.0  | 378.7      | 1.03    |
|     | 0.016     | 371.2  | 369.8  | 367.4  | 369.5      | 1.06    |
|     | 0.024     | 365.9  | 364.3  | 362.4  | 364.2      | 1.07    |
|     | 0.032     | 360.2  | 358.5  | 356.4  | 358.4      | 1.09    |
|     | 0.040     | 350.3  | 349.9  | 347.7  | 349.3      | 1.12    |

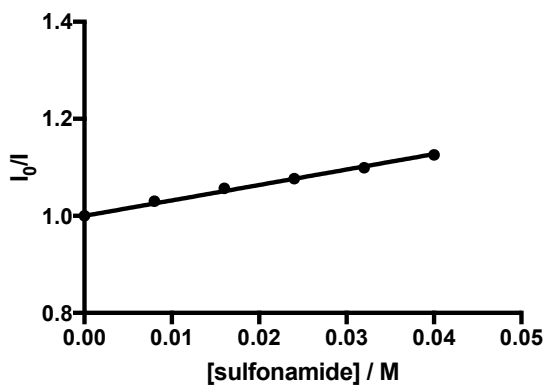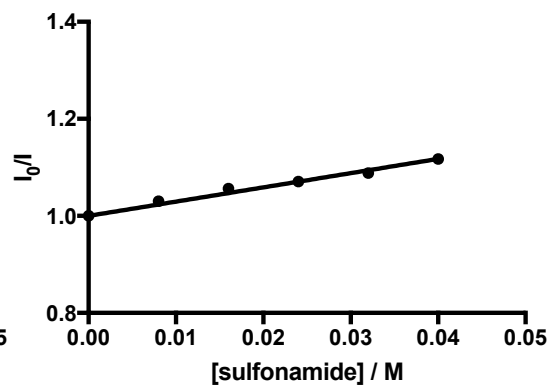

### Cyclic voltammetry details and results

Cyclic voltammetry experiments were carried out with 0.1 M  $\text{NBu}_4\text{PF}_6$  as electrolyte in acetonitrile. Experiments were run using a 0.002 M substrate, glassy carbon as working electrode, platinum mesh as counter electrode and SEC as reference electrode with a scan rate of 0.1 V/s.

#### 1. 4-methoxyl-*N*-propylbenzenesulfonamide

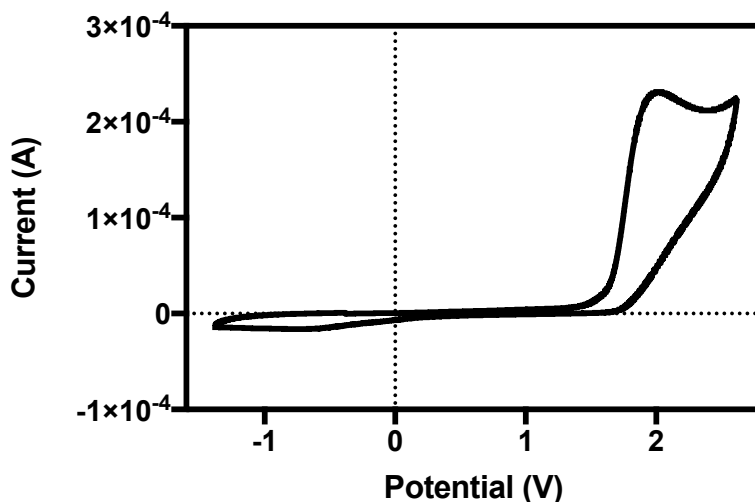

$$E_p = 2.08 \text{ V vs. Fc}^+/\text{Fc}$$
$$E_{p/2} = 1.77 \text{ V vs. Fc}^+/\text{Fc}$$

#### 2. 4-methyl-*N*-propylbenzenesulfonamide

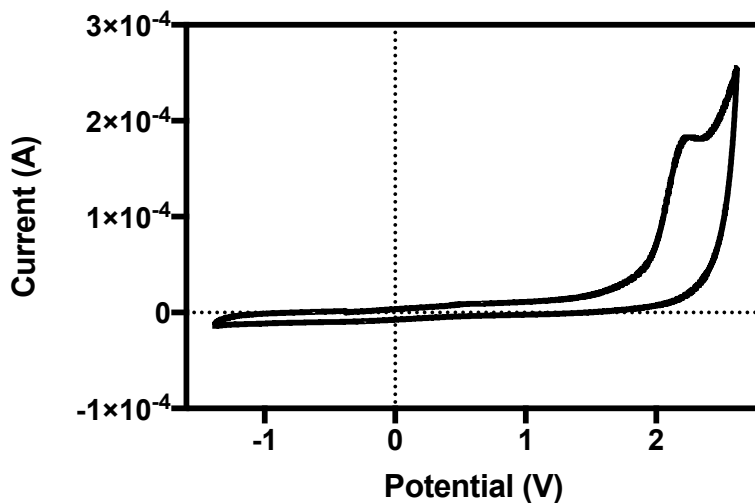

$$E_p = 2.31 \text{ V vs. Fc}^+/\text{Fc}$$
$$E_{p/2} = 2.07 \text{ V vs. Fc}^+/\text{Fc}$$

### 3. 4-cyano-*N*-propylbenzenesulfonamide

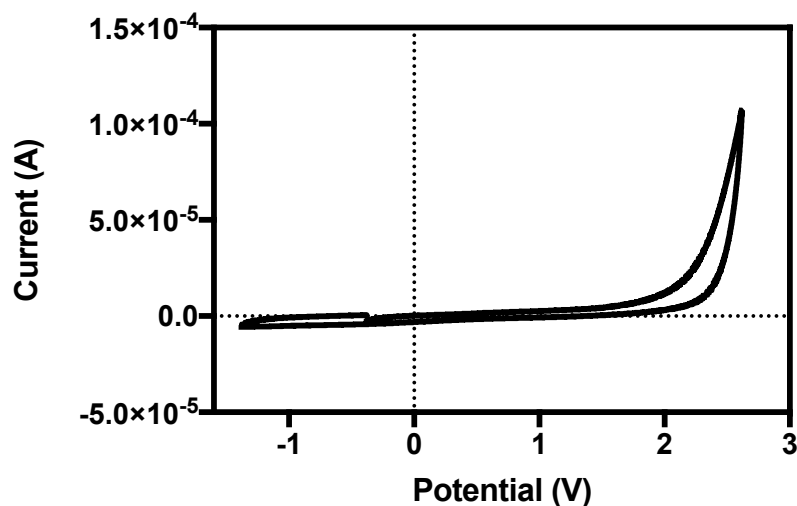

### 4. 4-methoxybenzenesulfonamide with different loading of phosphate base

Cyclic voltammetry experiments were carried out with 0.1 M  $\text{NBu}_4\text{PF}_6$  as electrolyte in dichloromethane. Experiments were run using a 0.0025 M substrate and various concentration of tetrabutylammonium dibutylphosphate, glassy carbon were used as working electrode, platinum mesh were used as counter electrode and  $\text{Ag}^+/\text{Ag}$  (in acetonitrile) were used as reference electrode with a scan rate of 0.1 V/s.

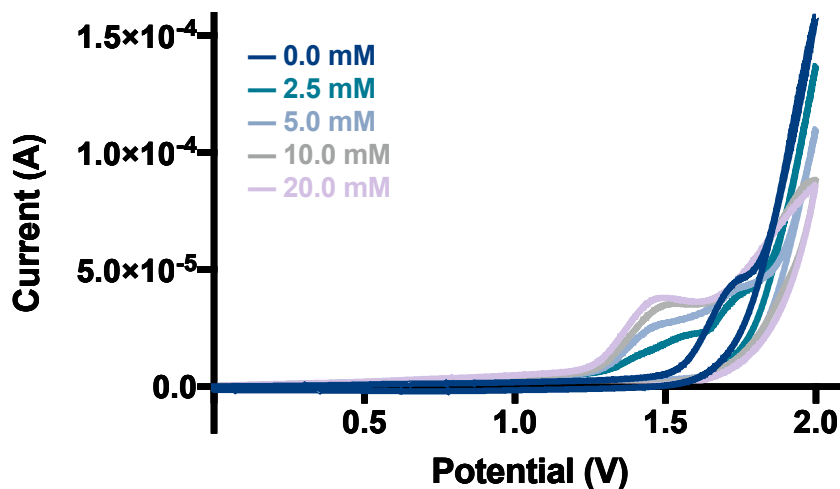

### 4. tetrabutylammonium dibutylphosphate base

Cyclic voltammetry experiments were carried out with 0.1 M  $\text{NBu}_4\text{PF}_6$  as electrolyte in dichloromethane. Experiments were run using a 0.005 M tetrabutylammonium dibutylphosphate, glassy carbon were used as working electrode, platinum mesh were

used as counter electrode and  $\text{Ag}^+/\text{Ag}$  (in acetonitrile) were used as reference electrode with a scan rate of 0.1 V/s.

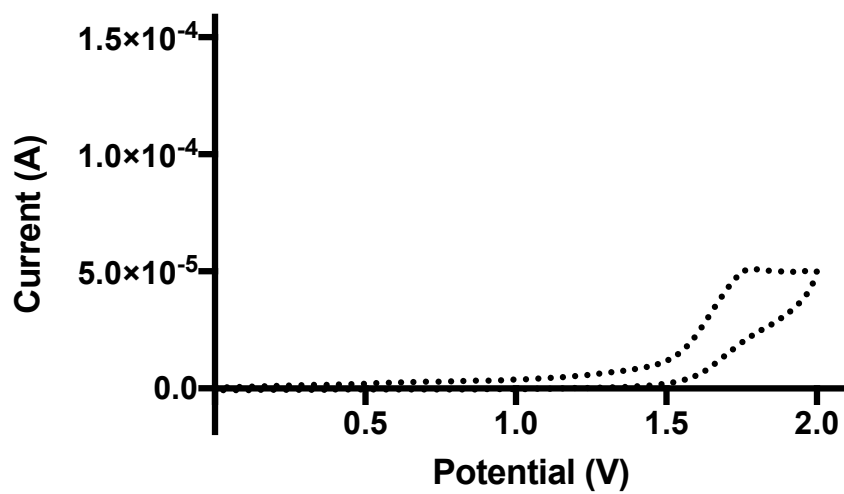



## DFT computational details and results

All calculations used DFT methodology as implemented in the Gaussian 09 series of computer programs. The absolute values were benchmarked with experimental bond strength of benzenesulfonamide (105.0 kcal/mol).<sup>20</sup> All complexes underwent geometry optimization, and stationary points were subjected to normal mode analysis. BDFE were calculated using the conversion factor 627.51 kcal mol<sup>-1</sup> per hartree and are rounded off after the third decimal place.

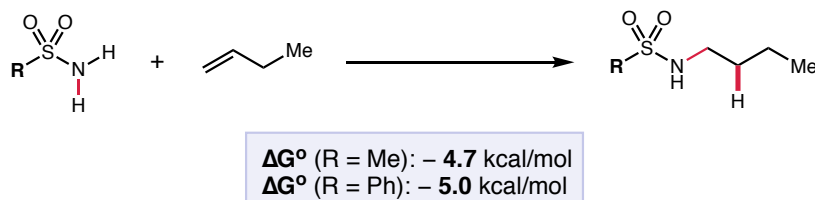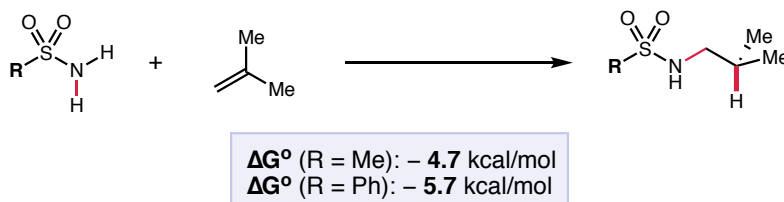

### Calculation 1:

We employed the unrestricted B3LYP functional with basis set 6-31G+(d,p) in gas phase.

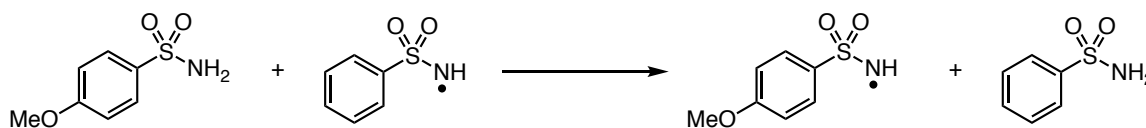

| Entry | Job name                              | E+ZPE       | G           | H           | S          |
|-------|---------------------------------------|-------------|-------------|-------------|------------|
| 1     | 4-methoxy-benzenesulfonamide          | -950.577854 | -950.616903 | -950.565039 | 109.158161 |
| 2     | benzenesulfonamidyl radical           | -835.419574 | -835.455010 | -835.409614 | 95.544961  |
| 3     | 4-methoxy-benzenesulfonamidyl radical | -949.918338 | -949.957344 | -949.905731 | 108.629881 |
| 4     | benzenesulfonamide                    | -836.079698 | -836.114941 | -836.069526 | 95.584951  |

$$\Delta\text{BDFE} = (-949.957344 - 836.114941 + 950.616903 + 835.455010) * 627.51 = -0.233 \text{ kcal/mol}$$

In 4- methoxy-benzenesulfonamide, BDFE(N-H) = 104.8 kcal/mol

**Calculation 2:**

We employed the unrestricted B3LYP functional with basis set 6-31G+(d,p) in gas phase.

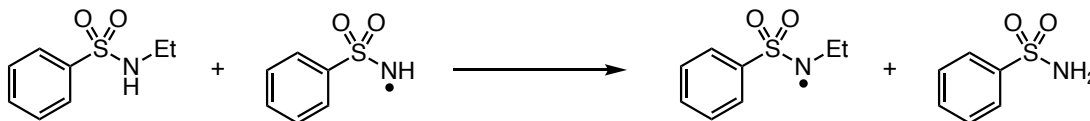

| Entry | Job name                                   | E+ZPE       | G           | H           | S          |
|-------|--------------------------------------------|-------------|-------------|-------------|------------|
| 5     | <i>N</i> -ethylbenzenesulfonamide          | -914.651680 | -914.691609 | -914.638843 | 111.056600 |
| 2     | benzenesulfonamidyl radical                | -835.419574 | -835.455010 | -835.409614 | 95.544961  |
| 6     | <i>N</i> -ethylbenzenesulfonamidyl radical | -914.003977 | -914.044624 | -913.990993 | 112.877166 |
| 4     | benzenesulfonamide                         | -836.079698 | -836.114941 | -836.069526 | 95.584951  |

$$\Delta\text{BDFE} = (-914.044624 - 836.114941 + 914.651680 + 835.455010) * 627.51 = -8.124 \text{ kcal/mol}$$

In *N*-ethylbenzenesulfonamide, BDFE(N-H) = 96.9 kcal/mol

**Calculation 3:**

We employed the CBS-QB3 functional in gas phase.

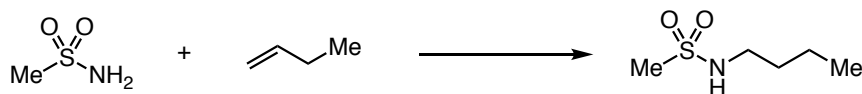

| Entry | Job name                          | CBS-QB3 (0K) | G           | H           | S          |
|-------|-----------------------------------|--------------|-------------|-------------|------------|
| 7     | methanesulfonamide                | -643.721196  | -643.750311 | -643.714204 | 75.994403  |
| 8     | 1-butene                          | -156.871268  | -156.898797 | -156.865019 | 71.092557  |
| 9     | <i>N</i> -butylmethanesulfonamide | -800.618010  | -800.656505 | -800.605468 | 107.417574 |

$$\Delta\text{G}^0 = (-800.656505 + 156.898797 + 643.750311) * 627.51 = -4.6 \text{ kcal/mol}$$

**Calculation 4:**

We employed the CBS-QB3 functional in gas phase.

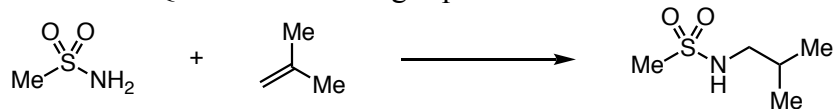

| Entry | Job name                              | CBS-QB3 (0K) | G           | H           | S          |
|-------|---------------------------------------|--------------|-------------|-------------|------------|
| 7     | methanesulfonamide                    | -643.721196  | -643.750311 | -643.714204 | 75.994403  |
| 10    | 2-methylpropene                       | -156.874796  | -156.901566 | -156.869121 | 68.286992  |
| 11    | <i>N</i> -isobutyl-methanesulfonamide | -800.621303  | -800.659322 | -800.608846 | 106.236837 |

$$\Delta G^{\circ} = (-800.659322 + 156.901566 + 643.750311) * 627.51 = -4.7 \text{ kcal/mol}$$

**Calculation 5:**

We employed the CBS-QB3 functional in gas phase.

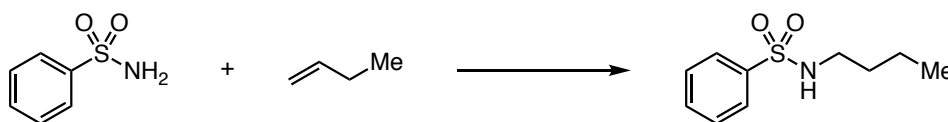

| Entry | Job name                           | CBS-QB3 (0K) | G           | H           | S          |
|-------|------------------------------------|--------------|-------------|-------------|------------|
| 12    | benzenesulfonamide                 | -835.107164  | -835.142191 | -835.097063 | 94.980902  |
| 8     | 1-butene                           | -156.871268  | -156.898797 | -156.865019 | 71.092557  |
| 13    | <i>N</i> -butyl-benzenesulfonamide | -992.006035  | -992.050118 | -991.990394 | 107.417574 |

$$\Delta G^{\circ} = (-992.050118 + 156.898797 + 835.142191) * 627.51 = -5.7 \text{ kcal/mol}$$

**Calculation 6:**

We employed the CBS-QB3 functional in gas phase.

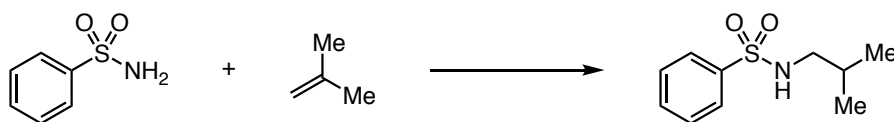

| Entry | Job name                   | CBS-QB3 (0K) | G           | H           | S          |
|-------|----------------------------|--------------|-------------|-------------|------------|
| 12    | benzenesulfonamide         | -835.107164  | -835.142191 | -835.097063 | 94.980902  |
| 10    | 2-methylpropene            | -156.874796  | -156.901566 | -156.869121 | 68.286992  |
| 14    | N-butyl-benzenesulfonamide | -992.009120  | -992.053084 | -991.993463 | 125.484319 |

$$\Delta G^0 = (-992.053084 + 156.901566 + 835.142191) * 627.51 = -5.9 \text{ kcal/mol}$$

### Optimized Geometries

Optimized geometries in Cartesian coordinates (Å) and energies (hartree) for stationary points.

#### 1. 4-methoxy-benzenesulfonamide

E(UB3LYP) = -950.737356

Zero-point correction= 0.159503 (Hartree/Particle)

Thermal correction to Energy= 0.171373

Thermal correction to Enthalpy= 0.172317

Thermal correction to Gibbs Free Energy= 0.120454

Sum of electronic and zero-point Energies= -950.577854

Sum of electronic and thermal Energies= -950.565983

Sum of electronic and thermal Enthalpies= -950.565039

Sum of electronic and thermal Free Energies= -950.616903

Charge = 0; multiplicity = 1;

|   |             |             |             |
|---|-------------|-------------|-------------|
| C | -1.68258480 | -0.98601197 | -0.02403387 |
| C | -0.29059138 | -1.09699140 | -0.07020642 |
| C | 0.49706338  | 0.05155635  | -0.08002149 |
| C | -0.08918859 | 1.32396093  | -0.05317409 |
| C | -1.47056760 | 1.43819203  | -0.00568135 |
| C | -2.27532307 | 0.28448729  | 0.01163235  |
| H | -2.28425184 | -1.88648063 | -0.02438082 |
| H | 0.17872709  | -2.07370821 | -0.11523259 |
| H | 0.53493304  | 2.21035601  | -0.08550759 |
| H | -1.95322466 | 2.40953360  | 0.00994720  |
| O | -3.61626816 | 0.50577543  | 0.05627734  |
| C | -4.49905356 | -0.61331539 | 0.06833927  |
| H | -5.50487222 | -0.19459024 | 0.10632461  |
| H | -4.38841029 | -1.21606686 | -0.84097242 |
| H | -4.33129758 | -1.24189459 | 0.95108663  |
| S | 2.27687084  | -0.10019159 | -0.13731789 |
| O | 2.81463272  | 1.08744984  | -0.81418815 |

|   |            |             |             |
|---|------------|-------------|-------------|
| O | 2.59158430 | -1.46593184 | -0.57935834 |
| N | 2.75640069 | 0.03579865  | 1.48803082  |
| H | 3.11157840 | -0.85558041 | 1.82499962  |
| H | 3.45396269 | 0.77129181  | 1.57163267  |

## 2. benzenesulfonamidyl radical

E(UB3LYP) = -835.521969

|                                              |                             |
|----------------------------------------------|-----------------------------|
| Zero-point correction=                       | 0.113111 (Hartree/Particle) |
| Thermal correction to Energy=                | 0.122126                    |
| Thermal correction to Enthalpy=              | 0.123071                    |
| Thermal correction to Gibbs Free Energy=     | 0.077674                    |
| Sum of electronic and zero-point Energies=   | -835.419574                 |
| Sum of electronic and thermal Energies=      | -835.410558                 |
| Sum of electronic and thermal Enthalpies=    | -835.409614                 |
| Sum of electronic and thermal Free Energies= | -835.455010                 |

Charge = 0; multiplicity = 2;

|   |             |             |             |
|---|-------------|-------------|-------------|
| C | 2.37295858  | 1.21326389  | 0.02396927  |
| C | 0.97803177  | 1.22150605  | -0.02794255 |
| C | 0.30131907  | 0.00000808  | -0.04995650 |
| C | 0.97800027  | -1.22149684 | -0.02786790 |
| C | 2.37292869  | -1.21328236 | 0.02406644  |
| H | 2.91543120  | 2.15343441  | 0.03772157  |
| H | 0.42241691  | 2.15211929  | -0.06381333 |
| H | 0.42241545  | -2.15213069 | -0.06371577 |
| H | 2.91538361  | -2.15346245 | 0.03790325  |
| S | -1.48638313 | 0.00002642  | -0.10060079 |
| O | -1.94955008 | -1.27856451 | -0.66553311 |
| O | -1.94957845 | 1.27923752  | -0.66415462 |
| N | -1.90534938 | -0.00068863 | 1.53192843  |
| H | -2.93913834 | -0.00080774 | 1.51918881  |
| C | 3.06734523  | -0.00002018 | 0.05204756  |
| H | 4.15259361  | -0.00001097 | 0.09043313  |

## 3. 4-methoxy-benzenesulfonamidyl radical

E(UB3LYP) = -950.059398

|                                              |                             |
|----------------------------------------------|-----------------------------|
| Zero-point correction=                       | 0.145568 (Hartree/Particle) |
| Thermal correction to Energy=                | 0.157232                    |
| Thermal correction to Enthalpy=              | 0.158176                    |
| Thermal correction to Gibbs Free Energy=     | 0.106563                    |
| Sum of electronic and zero-point Energies=   | -949.918338                 |
| Sum of electronic and thermal Energies=      | -949.906675                 |
| Sum of electronic and thermal Enthalpies=    | -949.905731                 |
| Sum of electronic and thermal Free Energies= | -949.957344                 |

Charge = 0; multiplicity = 2;

|   |             |             |             |
|---|-------------|-------------|-------------|
| C | -1.64733710 | -0.98768801 | -0.02652585 |
| C | -0.25634358 | -1.09482819 | -0.06082751 |
| C | 0.52586277  | 0.05897041  | -0.06522126 |
| C | -0.06207671 | 1.33092046  | -0.03941422 |
| C | -1.44405743 | 1.43949404  | -0.00476513 |
| C | -2.24430542 | 0.28233717  | 0.00462155  |
| H | -2.24668414 | -1.88953114 | -0.02936805 |
| H | 0.21581469  | -2.07057238 | -0.09664991 |
| H | 0.56117344  | 2.21815581  | -0.05981558 |
| H | -1.93048750 | 2.40880886  | 0.01017900  |
| O | -3.58421022 | 0.49800309  | 0.03869596  |
| C | -4.46560125 | -0.62360083 | 0.05018547  |
| H | -5.47190580 | -0.20588047 | 0.08125329  |
| H | -4.34870098 | -1.22869215 | -0.85652997 |
| H | -4.30092236 | -1.24762515 | 0.93642072  |
| S | 2.29700185  | -0.08754923 | -0.09011322 |
| O | 2.87335296  | 1.14069514  | -0.66503231 |
| O | 2.66268002  | -1.40916209 | -0.62919538 |
| N | 2.71105234  | -0.09541242 | 1.54544990  |
| H | 3.74088684  | -0.18590826 | 1.53410839  |

#### 4. benzenesulfonamide

E(UB3LYP) = -836.204312

Zero-point correction= 0.127034 (Hartree/Particle)

Thermal correction to Energy= 0.136262

Thermal correction to Enthalpy= 0.137206

Thermal correction to Gibbs Free Energy= 0.091791

Sum of electronic and zero-point Energies= -836.079698

Sum of electronic and thermal Energies= -836.070470

Sum of electronic and thermal Enthalpies= -836.069526

Sum of electronic and thermal Free Energies= -836.114941

Charge = 0; multiplicity = 1;

|   |             |             |             |
|---|-------------|-------------|-------------|
| C | 2.39947584  | 1.21233084  | 0.04211556  |
| C | 1.00527223  | 1.21944441  | -0.03371405 |
| C | 0.32597452  | -0.00005026 | -0.06417670 |
| C | 1.00533237  | -1.21945933 | -0.03366858 |
| C | 2.39957881  | -1.21225057 | 0.04214940  |
| H | 2.94107830  | 2.15312018  | 0.06165634  |
| H | 0.45122473  | 2.15028666  | -0.08609612 |
| H | 0.45137306  | -2.15035728 | -0.08596537 |
| H | 2.94122402  | -2.15301638 | 0.06171501  |
| S | -1.46920420 | -0.00008914 | -0.15268156 |

|   |             |             |             |
|---|-------------|-------------|-------------|
| O | -1.88846466 | -1.28758460 | -0.72067840 |
| O | -1.88845678 | 1.28681073  | -0.72203625 |
| N | -1.95130223 | 0.00074961  | 1.47410755  |
| H | -2.48237532 | 0.84312455  | 1.67974442  |
| H | -2.48264195 | -0.84126490 | 1.68053899  |
| C | 3.09479131  | 0.00004174  | 0.08318062  |
| H | 4.17932109  | 0.00013614  | 0.13895855  |

5. *N*-ethyl-benzenesulfonamide

E(UB3LYP) = -914.835419

|                                              |                             |
|----------------------------------------------|-----------------------------|
| Zero-point correction=                       | 0.183740 (Hartree/Particle) |
| Thermal correction to Energy=                | 0.195632                    |
| Thermal correction to Enthalpy=              | 0.196577                    |
| Thermal correction to Gibbs Free Energy=     | 0.143811                    |
| Sum of electronic and zero-point Energies=   | -914.651680                 |
| Sum of electronic and thermal Energies=      | -914.639787                 |
| Sum of electronic and thermal Enthalpies=    | -914.638843                 |
| Sum of electronic and thermal Free Energies= | -914.691609                 |

Charge = 0; multiplicity = 1;

|   |             |             |             |
|---|-------------|-------------|-------------|
| C | 2.99492798  | 0.42123746  | 1.02491630  |
| C | 1.68475407  | 0.84292591  | 0.80143355  |
| C | 0.90803423  | 0.16645083  | -0.14377327 |
| C | 1.41643559  | -0.90981801 | -0.87186572 |
| C | 2.73152571  | -1.32370638 | -0.63800449 |
| H | 3.61023130  | 0.94010555  | 1.75368179  |
| H | 1.27077067  | 1.68730451  | 1.34201746  |
| H | 0.79471647  | -1.39748654 | -1.61453541 |
| H | 3.13971522  | -2.15793343 | -1.20045804 |
| S | -0.77899064 | 0.71735188  | -0.44646224 |
| O | -1.26338567 | -0.02573383 | -1.61974233 |
| O | -0.81261653 | 2.18583093  | -0.40570076 |
| N | -1.59343968 | 0.23600511  | 0.94922224  |
| H | -2.18809404 | 1.00546155  | 1.24893942  |
| C | 3.51703988  | -0.66216365 | 0.30833191  |
| H | 4.53878060  | -0.98498834 | 0.48527856  |
| C | -2.20941423 | -1.10103173 | 1.02284465  |
| H | -2.24966216 | -1.36433493 | 2.08596967  |
| H | -1.51755933 | -1.80627880 | 0.55295194  |
| C | -3.59751228 | -1.20494670 | 0.38766514  |
| H | -3.55355705 | -0.97962067 | -0.68060793 |
| H | -3.99592787 | -2.21762688 | 0.51640180  |
| H | -4.29821387 | -0.50873109 | 0.86345727  |

## 6. N-ethyl-benzenesulfonamidyl radical

E(UB3LYP) = -914.173473

Zero-point correction= 0.169496 (Hartree/Particle)

Thermal correction to Energy= 0.181536

Thermal correction to Enthalpy= 0.182480

Thermal correction to Gibbs Free Energy= 0.128849

Sum of electronic and zero-point Energies= -914.003977

Sum of electronic and thermal Energies= -913.991938

Sum of electronic and thermal Enthalpies= -913.990993

Sum of electronic and thermal Free Energies= -914.044624

Charge = 0; multiplicity = 2;

|   |             |             |             |
|---|-------------|-------------|-------------|
| C | 2.93814639  | 0.54486780  | -1.21348712 |
| C | 1.63224172  | 0.05147486  | -1.22077491 |
| C | 0.99657787  | -0.18335124 | 0.00010096  |
| C | 1.63208794  | 0.05344186  | 1.22068030  |
| C | 2.93798821  | 0.54681172  | 1.21277186  |
| H | 3.44827447  | 0.72935485  | -2.15389513 |
| H | 1.11617354  | -0.16087802 | -2.15062289 |
| H | 1.11589635  | -0.15741750 | 2.15079979  |
| H | 3.44802094  | 0.73278030  | 2.15294016  |
| S | -0.68368095 | -0.80349525 | 0.00050090  |
| O | -0.93374546 | -1.48829218 | 1.28028785  |
| O | -0.93390517 | -1.48932490 | -1.27864058 |
| N | -1.58032785 | 0.64924217  | 0.00038100  |
| C | 3.58759211  | 0.79403633  | -0.00051793 |
| H | 4.60423668  | 1.17593394  | -0.00075288 |
| C | -3.01667028 | 0.42495706  | -0.00031823 |
| H | -3.28522747 | -0.18448677 | 0.87784756  |
| H | -3.28437270 | -0.18538415 | -0.87811857 |
| C | -3.76594443 | 1.75441592  | -0.00133248 |
| H | -3.51280575 | 2.34306183  | -0.88789167 |
| H | -4.84601829 | 1.57541931  | -0.00191507 |
| H | -3.51389984 | 2.34385587  | 0.88501443  |

## 7. methanesulfonamide

Total energy: -643.613144

E(ZPE)= 0.073542

E(Thermal)= 0.079590

E(SCF)= -642.562648

DE(MP2)= -1.050496

DE(CBS)= -0.109972

DE(MP34)= -0.030512

DE(CCSD)= -0.024685

DE(Int)= 0.035015



DE(Empirical)= -0.051440  
 CBS-QB3 (0 K)= -643.721196  
 CBS-QB3 Energy= -643.715148  
 CBS-QB3 Enthalpy= -643.714204  
 CBS-QB3 Free Energy= -643.750311

Charge = 0; multiplicity = 1;

|   |             |             |             |
|---|-------------|-------------|-------------|
| C | -1.54842225 | 0.64158152  | 0.00049240  |
| H | -1.62910284 | 1.25179187  | -0.89735983 |
| H | -1.62902059 | 1.25068412  | 0.89910123  |
| H | -2.30158929 | -0.14635603 | 0.00002224  |
| S | 0.04434696  | -0.17045559 | -0.00008200 |
| O | 0.19288432  | -0.85186443 | -1.26401485 |
| O | 0.19333172  | -0.85294090 | 1.26321582  |
| N | 1.10115947  | 1.13400065  | 0.00040815  |
| H | 1.67190011  | 1.11031401  | 0.83879086  |
| H | 1.67095005  | 1.11180442  | -0.83866175 |

## 8. 1-butene

Total energy: -156.830191

E(ZPE)= 0.106896  
 E(Thermal)= 0.112200  
 E(SCF)= -156.159726  
 DE(MP2)= -0.670465  
 DE(CBS)= -0.064311  
 DE(MP34)= -0.051655  
 DE(CCSD)= -0.020173  
 DE(Int)= 0.023407  
 DE(Empirical)= -0.035240  
 CBS-QB3 (0 K)= -156.871268  
 CBS-QB3 Energy= -156.865964  
 CBS-QB3 Enthalpy= -156.865019  
 CBS-QB3 Free Energy= -156.898797

Charge = 0; multiplicity = 1;

|   |             |             |             |
|---|-------------|-------------|-------------|
| C | 1.85790274  | 0.01723232  | -0.28063846 |
| H | 1.95202164  | 0.92452634  | -0.87048695 |
| H | 2.73420582  | -0.61865800 | -0.22178390 |
| C | 0.72412363  | -0.29416259 | 0.34029145  |
| H | 0.67642907  | -1.21693392 | 0.91831420  |
| C | -0.53898363 | 0.51999234  | 0.30799349  |
| H | -0.36536248 | 1.44205099  | -0.25613937 |
| H | -0.79644153 | 0.82229414  | 1.33138510  |
| C | -1.72774405 | -0.24675452 | -0.29414868 |
| H | -1.92876147 | -1.16625588 | 0.26389827  |

|   |             |             |             |
|---|-------------|-------------|-------------|
| H | -2.63690288 | 0.36019756  | -0.27414455 |
| H | -1.52698033 | -0.52506655 | -1.33202959 |

### 9. N-butyl-methanesulfonamide

Total energy: -800.475480

|                      |             |
|----------------------|-------------|
| E(ZPE)=              | 0.185531    |
| E(Thermal)=          | 0.197128    |
| E(SCF)=              | -798.741668 |
| DE(MP2)=             | -1.733812   |
| DE(CBS)=             | -0.174223   |
| DE(MP34)=            | -0.080132   |
| DE(CCSD)=            | -0.044902   |
| DE(Int)=             | 0.057991    |
| DE(Empirical)=       | -0.086794   |
| CBS-QB3 (0 K)=       | -800.618010 |
| CBS-QB3 Energy=      | -800.606412 |
| CBS-QB3 Enthalpy=    | -800.605468 |
| CBS-QB3 Free Energy= | -800.656505 |

Charge = 0; multiplicity = 1;

|   |             |             |             |
|---|-------------|-------------|-------------|
| C | -2.41171216 | -1.04401473 | -1.16626670 |
| H | -1.73569929 | -1.89836122 | -1.16147894 |
| H | -2.38157052 | -0.52317523 | -2.12106099 |
| H | -3.42573711 | -1.36593301 | -0.92849538 |
| S | -1.91680518 | 0.09551096  | 0.12148836  |
| O | -1.89984215 | -0.64346488 | 1.36357982  |
| O | -2.68903706 | 1.30808236  | -0.02732013 |
| N | -0.35592866 | 0.49115999  | -0.33242880 |
| H | -0.28305473 | 1.50365654  | -0.32692460 |
| C | 0.77694706  | -0.19709054 | 0.31384489  |
| H | 0.67157956  | -1.26907839 | 0.12719116  |
| H | 0.76302081  | -0.05849701 | 1.40030457  |
| C | 2.09423009  | 0.30483053  | -0.27622671 |
| H | 2.07930137  | 0.15770182  | -1.36164568 |
| H | 2.17475155  | 1.38703641  | -0.10893884 |
| C | 3.31714542  | -0.39114516 | 0.33205136  |
| H | 3.23816775  | -1.47166357 | 0.16373107  |
| H | 3.31146244  | -0.25035701 | 1.41905968  |
| C | 4.64147446  | 0.11910716  | -0.24245449 |
| H | 5.49359149  | -0.39622358 | 0.20796403  |
| H | 4.69100224  | -0.03898150 | -1.32407911 |
| H | 4.76609241  | 1.19051698  | -0.05820666 |

## 10. 2-methylpropene

Total energy: -156.833026  
E(ZPE)= 0.105912  
E(Thermal)= 0.110642  
E(SCF)= -156.160516  
DE(MP2)= -0.672510  
DE(CBS)= -0.064408  
DE(MP34)= -0.051147  
DE(CCSD)= -0.020313  
DE(Int)= 0.023410  
DE(Empirical)= -0.035224  
CBS-QB3 (0 K)= -156.874796  
CBS-QB3 Energy= -156.870065  
CBS-QB3 Enthalpy= -156.869121  
CBS-QB3 Free Energy= -156.901566

Charge = 0; multiplicity = 1;

|   |             |             |             |
|---|-------------|-------------|-------------|
| C | -0.02760245 | 1.45285707  | -0.00001074 |
| H | 0.88759065  | 2.03648441  | -0.00010924 |
| H | -0.96000885 | 2.00686567  | 0.00002369  |
| C | -0.00728634 | 0.12033853  | 0.00002090  |
| C | 1.29691214  | -0.65727766 | -0.00003251 |
| H | 1.12253164  | -1.73553245 | -0.00073755 |
| H | 1.90012281  | -0.42025575 | -0.88109956 |
| H | 1.89952225  | -0.42132803 | 0.88173712  |
| C | -1.27217374 | -0.69796549 | 0.00003535  |
| H | -1.31253091 | -1.35257750 | -0.87865895 |
| H | -1.31232485 | -1.35285061 | 0.87853142  |
| H | -2.16400047 | -0.06852041 | 0.00023509  |

## 11. *N*-isobutyl-methanesulfonamide

Total energy: -800.478827  
E(ZPE)= 0.185086  
E(Thermal)= 0.196599  
E(SCF)= -798.741298  
DE(MP2)= -1.737529  
DE(CBS)= -0.174262  
DE(MP34)= -0.079241  
DE(CCSD)= -0.045297  
DE(Int)= 0.057995  
DE(Empirical)= -0.086756  
CBS-QB3 (0 K)= -800.621303  
CBS-QB3 Energy= -800.609790  
CBS-QB3 Enthalpy= -800.608846

CBS-QB3 Free Energy= -800.659322

Charge = 0; multiplicity = 1;

|   |             |             |             |
|---|-------------|-------------|-------------|
| C | -1.99184646 | 1.32030689  | -0.90153555 |
| H | -1.26571547 | 1.38182154  | -1.71123818 |
| H | -1.91884237 | 2.18181957  | -0.24097464 |
| H | -2.99942436 | 1.22290722  | -1.30616219 |
| S | -1.67482347 | -0.15967185 | 0.05306295  |
| O | -1.72090853 | -1.27652037 | -0.86295035 |
| O | -2.50111743 | -0.11605765 | 1.23808720  |
| N | -0.10788944 | 0.08083420  | 0.58455144  |
| H | -0.09976074 | -0.05469937 | 1.59041094  |
| C | 1.00744683  | -0.57266438 | -0.12337798 |
| H | 0.89071688  | -0.37304282 | -1.19205526 |
| H | 0.97237985  | -1.66027844 | 0.00187548  |
| C | 2.35969273  | -0.02587377 | 0.35874834  |
| H | 2.40666438  | -0.17434950 | 1.44685914  |
| C | 3.49997820  | -0.83479583 | -0.27327900 |
| H | 3.49198583  | -0.73519195 | -1.36386738 |
| H | 4.47097047  | -0.48224241 | 0.08374874  |
| H | 3.42085532  | -1.89883379 | -0.03383228 |
| C | 2.50924908  | 1.47298444  | 0.07275689  |
| H | 2.50522356  | 1.66164623  | -1.00653572 |
| H | 1.69365324  | 2.04591898  | 0.51767116  |
| H | 3.45278034  | 1.85431500  | 0.47226198  |

## 12. benzenesulfonamide

Total energy: -834.927290

|                      |             |
|----------------------|-------------|
| E(ZPE)=              | 0.126002    |
| E(Thermal)=          | 0.135158    |
| E(SCF)=              | -833.119155 |
| DE(MP2)=             | -1.808135   |
| DE(CBS)=             | -0.180544   |
| DE(MP34)=            | -0.040913   |
| DE(CCSD)=            | -0.061028   |
| DE(Int)=             | 0.059017    |
| DE(Empirical)=       | -0.082406   |
| CBS-QB3 (0 K)=       | -835.107164 |
| CBS-QB3 Energy=      | -835.098007 |
| CBS-QB3 Enthalpy=    | -835.097063 |
| CBS-QB3 Free Energy= | -835.142191 |

Charge = 0; multiplicity = 1;

|   |             |             |             |
|---|-------------|-------------|-------------|
| C | -0.31788366 | 0.00001392  | -0.05547863 |
| C | -0.99941585 | -1.21498079 | -0.03020399 |

|   |             |             |             |
|---|-------------|-------------|-------------|
| C | -2.38966922 | -1.20864447 | 0.04053841  |
| C | -3.08340414 | -0.00002632 | 0.07933825  |
| C | -2.38969731 | 1.20861169  | 0.04068738  |
| C | -0.99944304 | 1.21498951  | -0.03005424 |
| H | -0.44588683 | -2.14350977 | -0.08311370 |
| H | -2.93050052 | -2.14769144 | 0.05687653  |
| H | -4.16622303 | -0.00004133 | 0.13041432  |
| H | -2.93055153 | 2.14764346  | 0.05714193  |
| H | -0.44593074 | 2.14353476  | -0.08285064 |
| S | 1.46733477  | 0.00003300  | -0.15343636 |
| O | 1.87538993  | 1.26753464  | -0.71244646 |
| O | 1.87541404  | -1.26728370 | -0.71284719 |
| N | 1.94074221  | -0.00026072 | 1.45372924  |
| H | 2.46375737  | -0.84210048 | 1.66668313  |
| H | 2.46343109  | 0.84167301  | 1.66711154  |

### 13. N-butyl-benzenesulfonamide

Total energy: -991.792269

|                      |             |
|----------------------|-------------|
| E(ZPE)=              | 0.237991    |
| E(Thermal)=          | 0.252687    |
| E(SCF)=              | -989.299363 |
| DE(MP2)=             | -2.492907   |
| DE(CBS)=             | -0.244595   |
| DE(MP34)=            | -0.089974   |
| DE(CCSD)=            | -0.081411   |
| DE(Int)=             | 0.081963    |
| DE(Empirical)=       | -0.117739   |
| CBS-QB3 (0 K)=       | -992.006035 |
| CBS-QB3 Energy=      | -991.991339 |
| CBS-QB3 Enthalpy=    | -991.990394 |
| CBS-QB3 Free Energy= | -992.050118 |

Charge = 0; multiplicity = 1;

|   |            |             |             |
|---|------------|-------------|-------------|
| C | 1.65835017 | 0.03997367  | 0.00849492  |
| C | 2.04082577 | -0.55676613 | 1.20668505  |
| C | 2.87774498 | -1.67155431 | 1.17152932  |
| C | 3.32419395 | -2.17152058 | -0.04877844 |
| C | 2.93990754 | -1.55849432 | -1.24297058 |
| C | 2.10513984 | -0.44748023 | -1.22019107 |
| H | 1.69554453 | -0.14026024 | 2.14393313  |
| H | 3.18351719 | -2.14269891 | 2.09843896  |
| H | 3.97718858 | -3.03656559 | -0.07245433 |
| H | 3.29614396 | -1.94424714 | -2.19112399 |
| H | 1.80822189 | 0.04631137  | -2.13653775 |
| S | 0.60912944 | 1.48872739  | 0.04159406  |

|   |             |             |             |
|---|-------------|-------------|-------------|
| N | -0.83288254 | 0.90182999  | -0.56100350 |
| H | -1.22333151 | 1.60725924  | -1.17831221 |
| O | 1.07227031  | 2.42402836  | -0.95830693 |
| O | 0.46492081  | 1.87588839  | 1.42792578  |
| C | -1.80020143 | 0.28979664  | 0.36472808  |
| H | -2.12199177 | 0.99970508  | 1.13512322  |
| H | -1.29497554 | -0.53546865 | 0.87448790  |
| C | -3.00178934 | -0.24414633 | -0.41427318 |
| H | -3.48338063 | 0.58515635  | -0.94907429 |
| H | -2.64688749 | -0.94397643 | -1.17851705 |
| C | -4.03457869 | -0.92955859 | 0.48704961  |
| H | -4.37289774 | -0.22398583 | 1.25478074  |
| H | -3.55297056 | -1.75607958 | 1.02264026  |
| C | -5.24416242 | -1.45980272 | -0.28763588 |
| H | -5.96040107 | -1.94605186 | 0.37958629  |
| H | -5.76885240 | -0.65066734 | -0.80492518 |
| H | -4.94093163 | -2.19289511 | -1.04130398 |

#### 14. N-butyl-benzenesulfonamide

Total energy: -991.795401

|                      |             |
|----------------------|-------------|
| E(ZPE)=              | 0.237427    |
| E(Thermal)=          | 0.252140    |
| E(SCF)=              | -989.298559 |
| DE(MP2)=             | -2.496841   |
| DE(CBS)=             | -0.244529   |
| DE(MP34)=            | -0.089020   |
| DE(CCSD)=            | -0.081850   |
| DE(Int)=             | 0.081946    |
| DE(Empirical)=       | -0.117694   |
| CBS-QB3 (0 K)=       | -992.009120 |
| CBS-QB3 Energy=      | -991.994407 |
| CBS-QB3 Enthalpy=    | -991.993463 |
| CBS-QB3 Free Energy= | -992.053084 |

Charge = 0; multiplicity = 1;

|   |            |             |             |
|---|------------|-------------|-------------|
| C | 1.51541629 | 0.17779228  | 0.00620568  |
| C | 2.08518143 | -0.37672664 | 1.14878613  |
| C | 3.09268616 | -1.33083003 | 1.00893395  |
| C | 3.51895002 | -1.71569830 | -0.25924986 |
| C | 2.94387657 | -1.14669819 | -1.39736648 |
| C | 1.93920305 | -0.19489042 | -1.27008458 |
| H | 1.74800020 | -0.05148667 | 2.12435125  |
| H | 3.54507386 | -1.76710199 | 1.89188145  |
| H | 4.30388200 | -2.45601094 | -0.36446943 |
| H | 3.28303714 | -1.44224514 | -2.38342982 |
| H | 1.49114513 | 0.26267593  | -2.14278678 |

|   |             |             |             |
|---|-------------|-------------|-------------|
| S | 0.24678333  | 1.42867349  | 0.17407199  |
| N | -1.10612914 | 0.64870194  | -0.41520554 |
| H | -1.63148169 | 1.32101513  | -0.96415284 |
| O | 0.50253273  | 2.48635387  | -0.77733746 |
| O | 0.10792515  | 1.70400330  | 1.58724602  |
| C | -1.90903429 | -0.17640537 | 0.50166931  |
| H | -2.42623595 | 0.44037561  | 1.24767900  |
| H | -1.21728199 | -0.82478261 | 1.04462021  |
| C | -2.91968077 | -1.04449809 | -0.26179889 |
| H | -2.35133492 | -1.63993714 | -0.98596823 |
| C | -3.61722696 | -2.00047654 | 0.71540811  |
| H | -4.19273769 | -1.44802412 | 1.46549034  |
| H | -4.31047269 | -2.65951235 | 0.18637472  |
| H | -2.89545992 | -2.62968236 | 1.24408877  |
| C | -3.94651097 | -0.20142723 | -1.03090089 |
| H | -4.50307567 | 0.45466995  | -0.35294105 |
| H | -3.47902723 | 0.42059456  | -1.79948453 |
| H | -4.67048617 | -0.84394353 | -1.53884959 |

## Reference:

1. D. D. Perrin, W. L. F. Amarego, *Purification of Laboratory Chemicals* (Pergamon, Press, Oxford, ed. 3, 1988).
2. A. B. Pangborn, M. A. Giardello, R. H. Grubbs, R. K. Rosen, F. J. Timmers, *Organometallics* **1996**, *15*, 1518.
3. Still, W. C.; Khan, M.; Mitra, A.; *J. Org. Chem.* **1978**, *43*, 2923.
4. Bondalapati, S., Indukuri, K., Ghosh, P. and Saikia, A. K., *Eur. J. Org. Chem.*, **2013**, 952.
5. Kim, J. Y. and Livinghouse, T., *Org. Lett.*, **2005**, *7*, 1737.
6. Ryu, J.-S., Marks, T. J., McDonald, F. E., *Org. Lett.*, **2001**, *3*, 3091.
7. Bender, C. F., Widenhoefer, R. A., *J. Am. Chem. Soc.*, **2005**, *127*, 1070.
8. Nicolai, S. and Waser, J., *Org. Lett.*, **2011**, *13*, 6324.
9. Nagamoto, M., Yanagi, T., Nishimura, T. and Yorimitsu, H., *Org. Lett.*, **2016**, *18*, 4474.
10. Nguyen, T. and Nicewicz, D. A. *J. Am. Chem. Soc.*, **2013**, *135*, 9588.
11. Su, C.-C., Williard, P. G., *Org. Lett.*, **2010**, *12*, 5378.
12. Abraham, E., Cooke, J. W. B., Davies, S. G., Naylor, A., Nicholson, R. L., Price, P. D., Smith, A. D., *Tetrahedron*, **2007**, *63*, 5855.
13. Wang, P., Li, J., Yu, C.-L., Xiao, X., Wu, P.-Y., Zeng, B.-B., *Tetrahedron*, **2015**, *71*, 4647.
14. Mao, S.-W., Shuai, L., He, H.-B., Pan, N., Gao, L.-X., Yu, L.-F., Li, J., Li, J.-Y., Yang, F., *RSC Adv.*, **2015**, *5*, 106511.
15. Gargiulo, D., Blizzard, T. A., Nakanishi, K., *Tetrahedron*, **1989**, *45*, 5423.
16. A. Singh, K. Teegardin, M. Kelly, K. S. Prasad, S. Krishnan, J. D. Weaver, *J. Organomet. Chem.* **2015**, 776, 51.
17. L. Li, M. Zeng, and S. B. Herzon, *Angew. Chem. Int. Ed.* **2014**, *53*, 7892.
18. Musacchio, A. J.; Lainhart, B. C.; Zhang, X.; Naguib, S. G.; Sherwood, T. C.; Knowles, R. R. *Science*, **2017**, *355*, 727.
19. Choi, G. J., Zhu, Q., Miller, D. C., Gu, C. J., Knowles, R. R., *Nature*, **2016**, *539*, 268.
20. Zhao, Y.; Bordwell, F. G.; Cheng, J.; Wang, D. *J. Am. Chem. Soc.* **1997**, *119*, 9125.



## VII. $^1\text{H}$ and $^{13}\text{C}$ NMR Spectra of Products

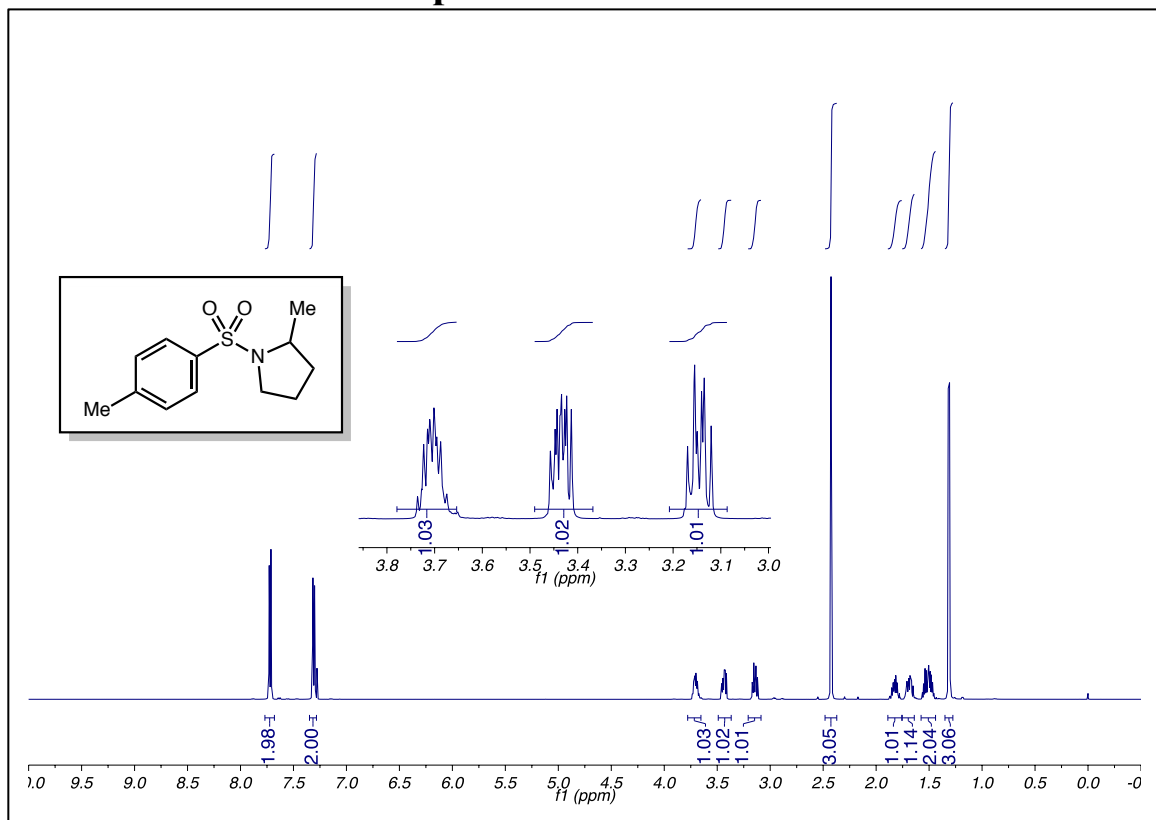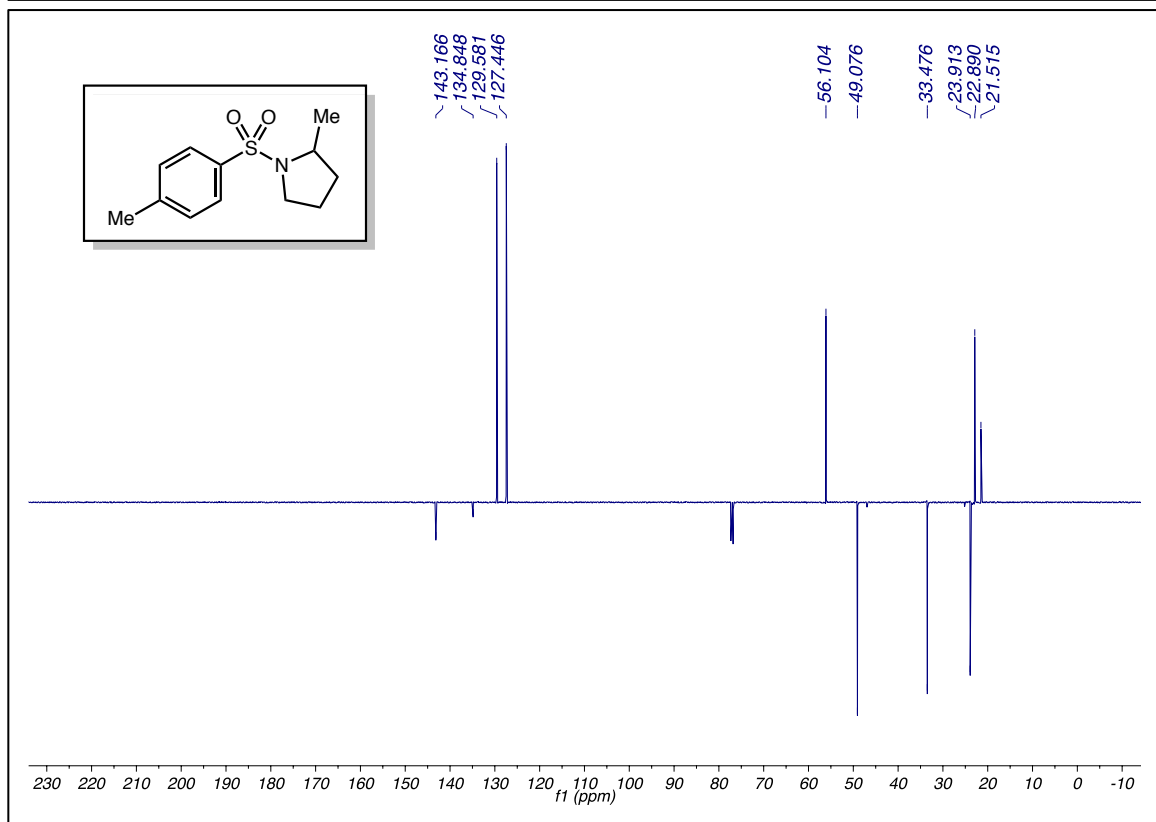

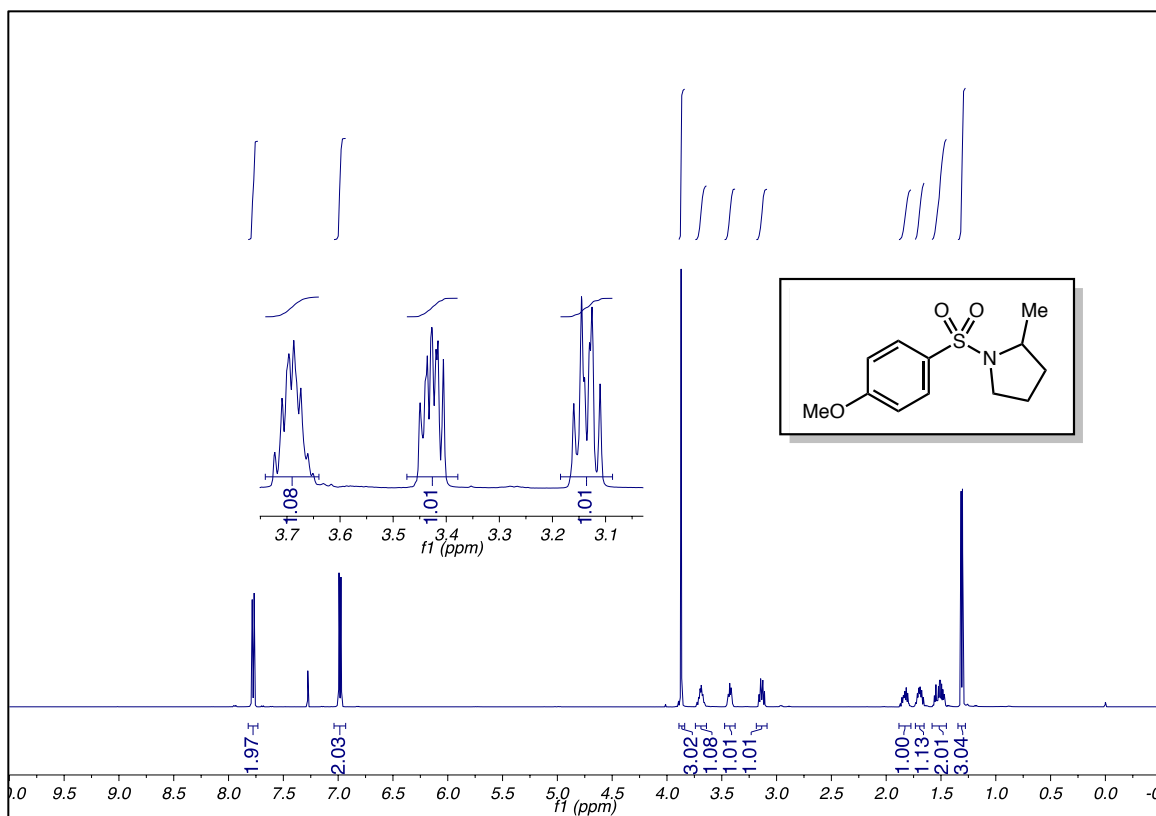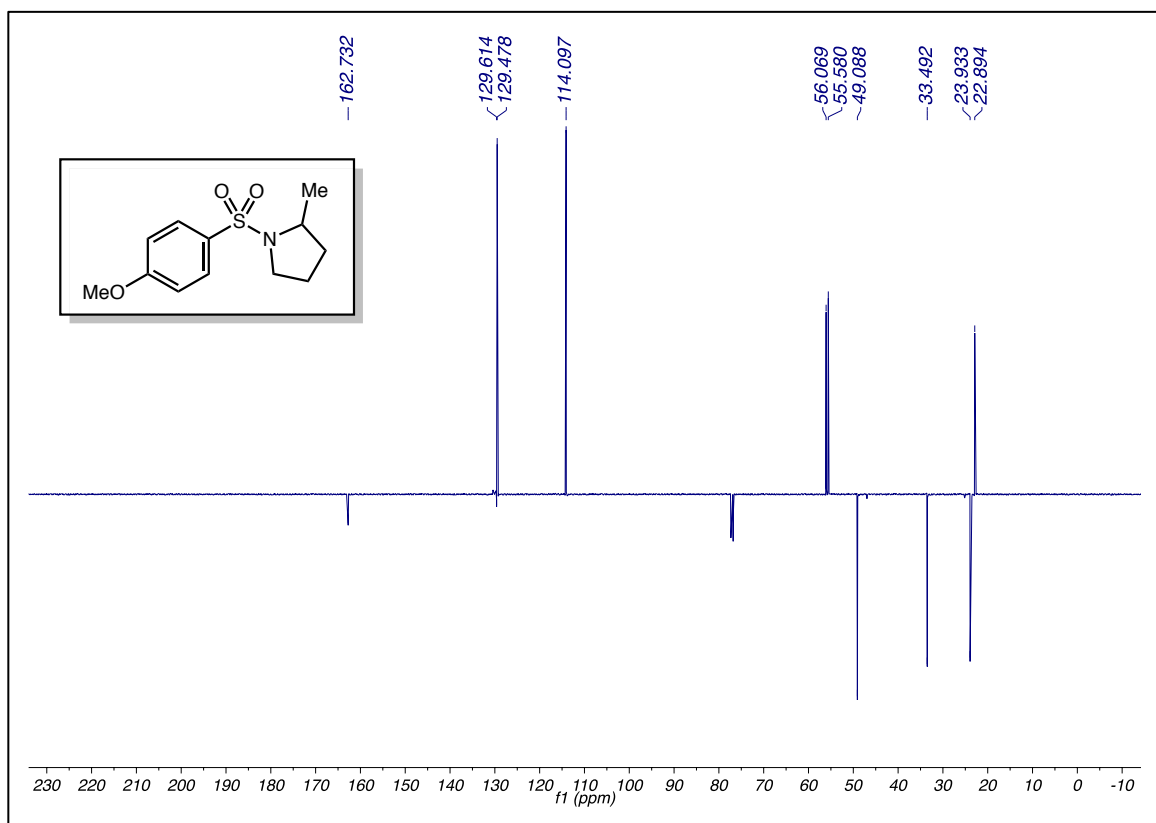

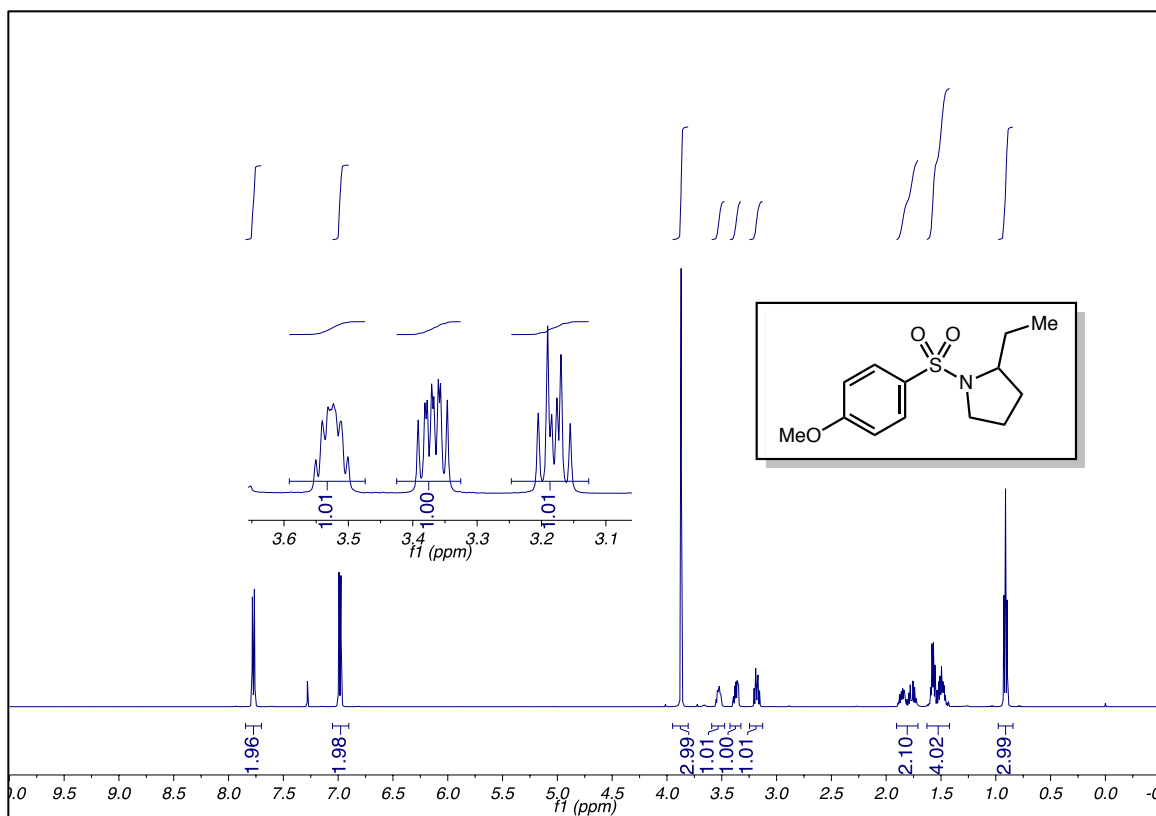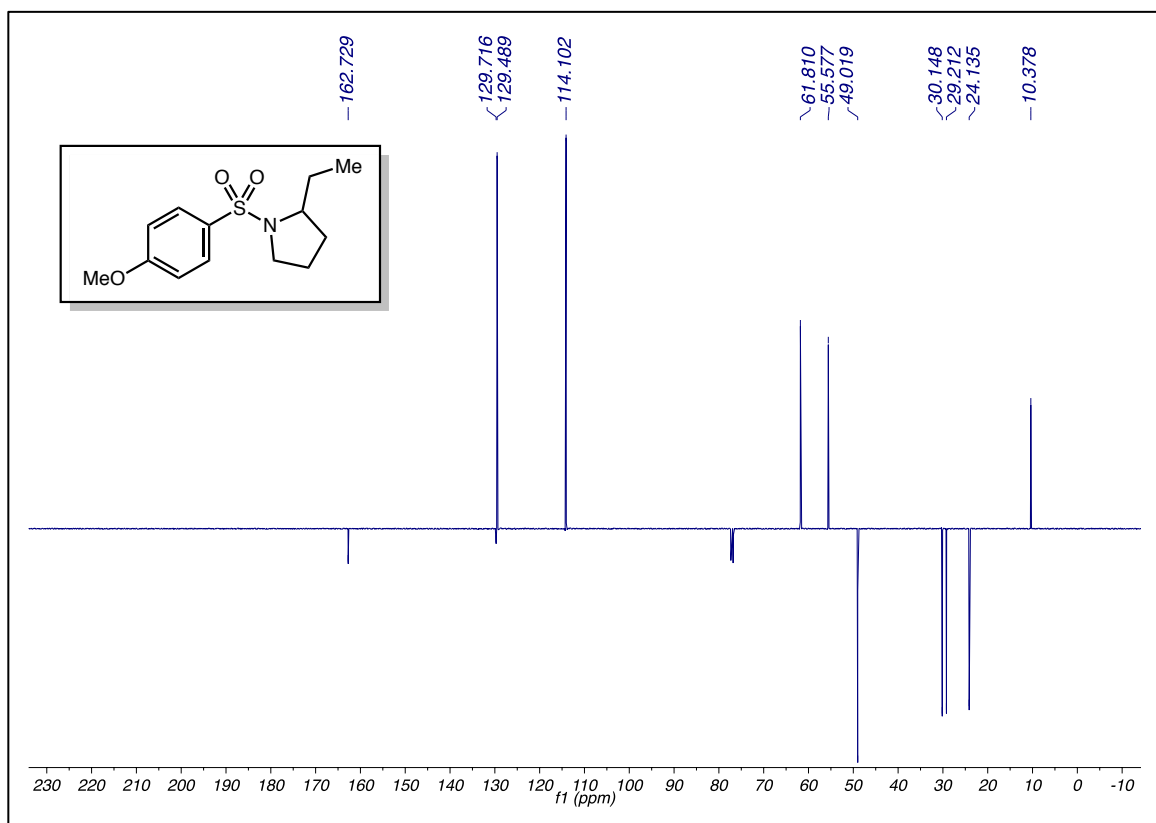

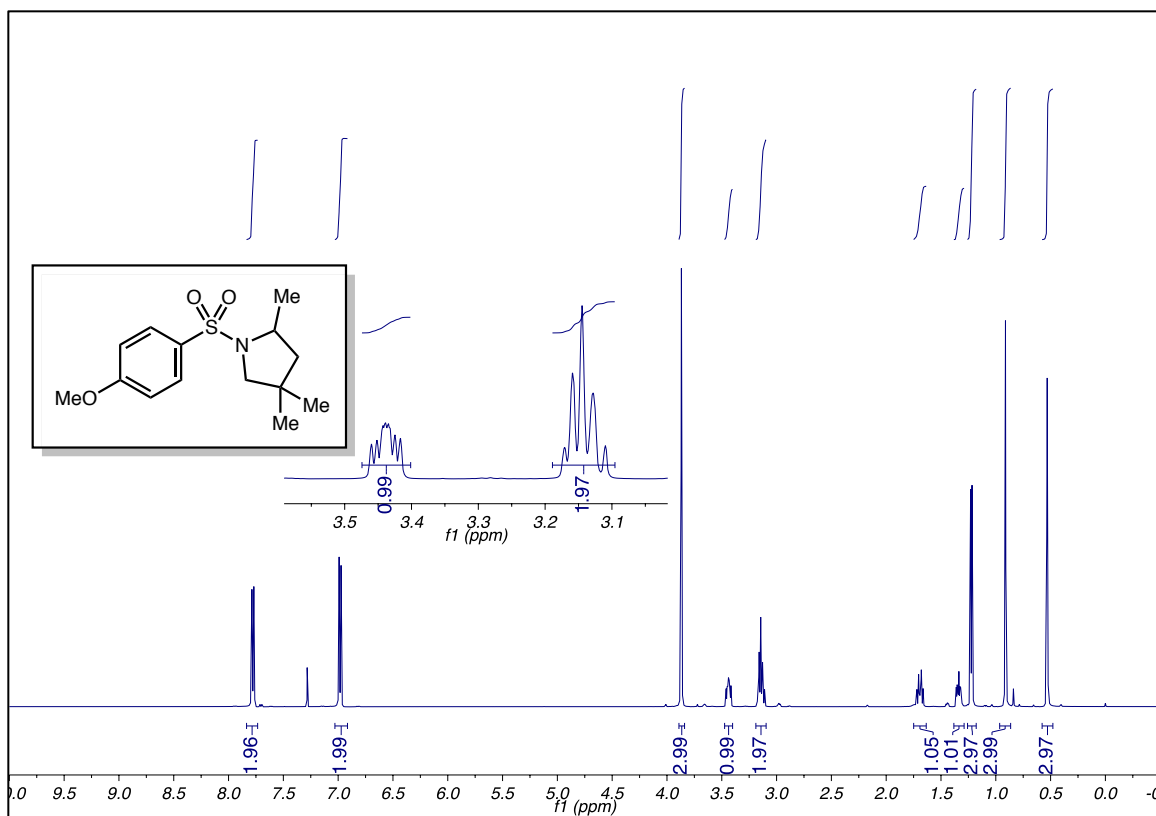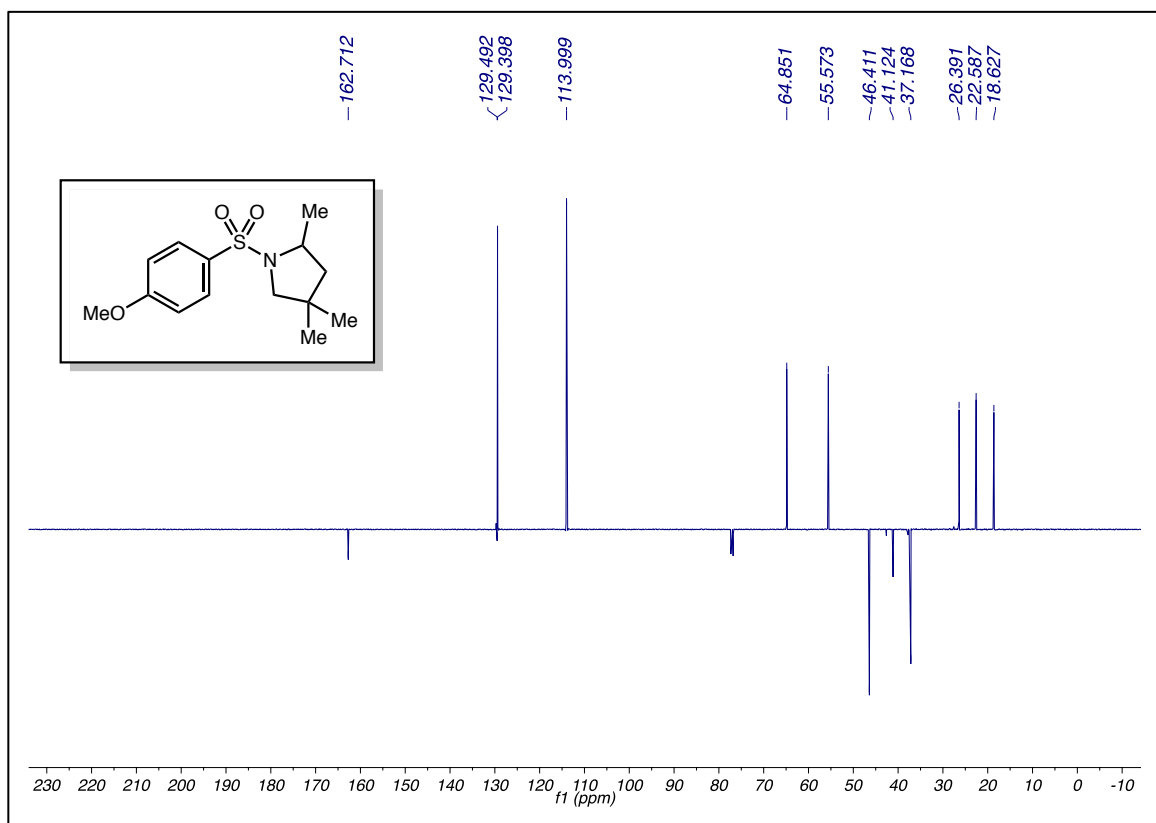

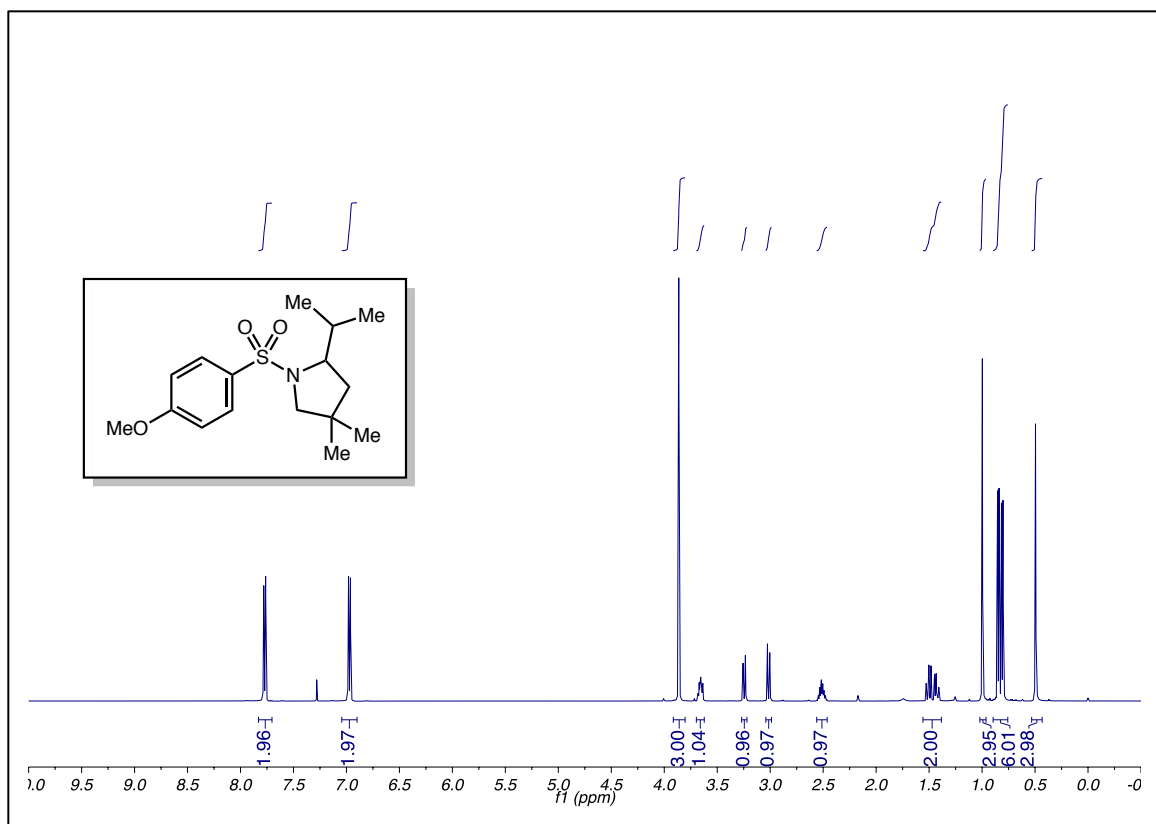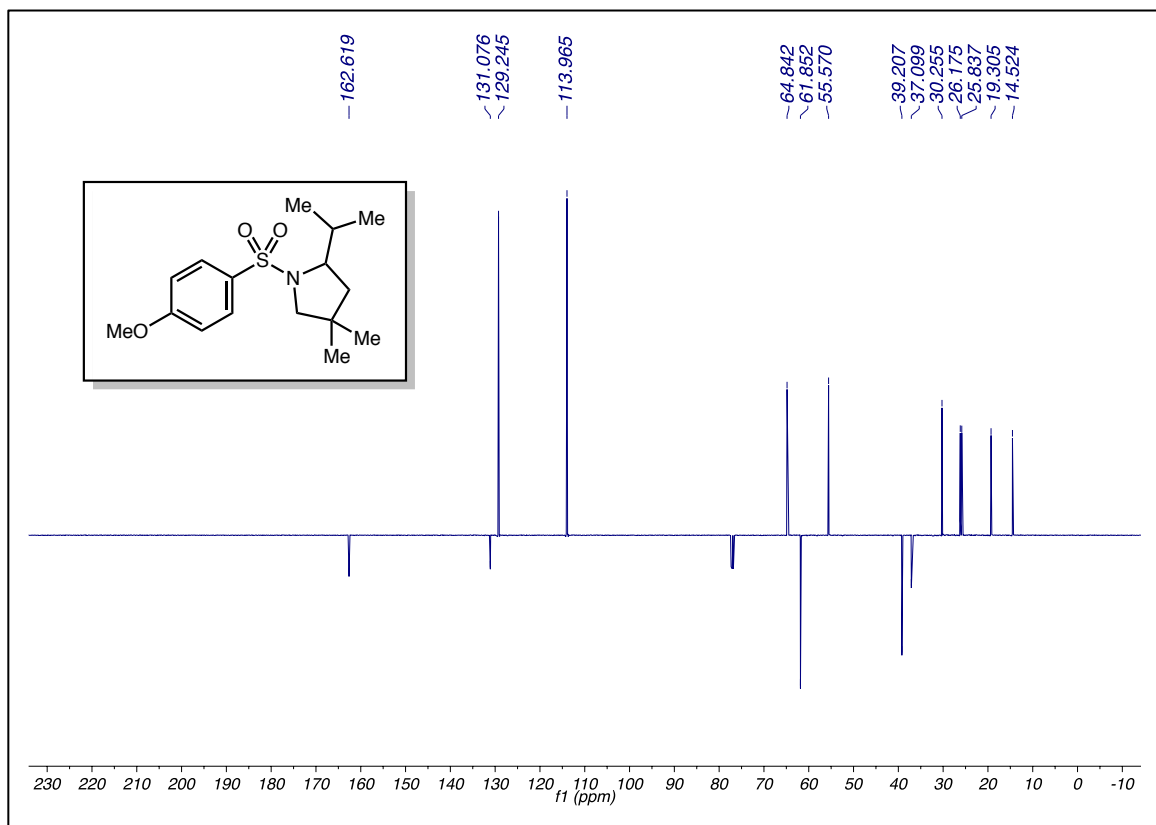

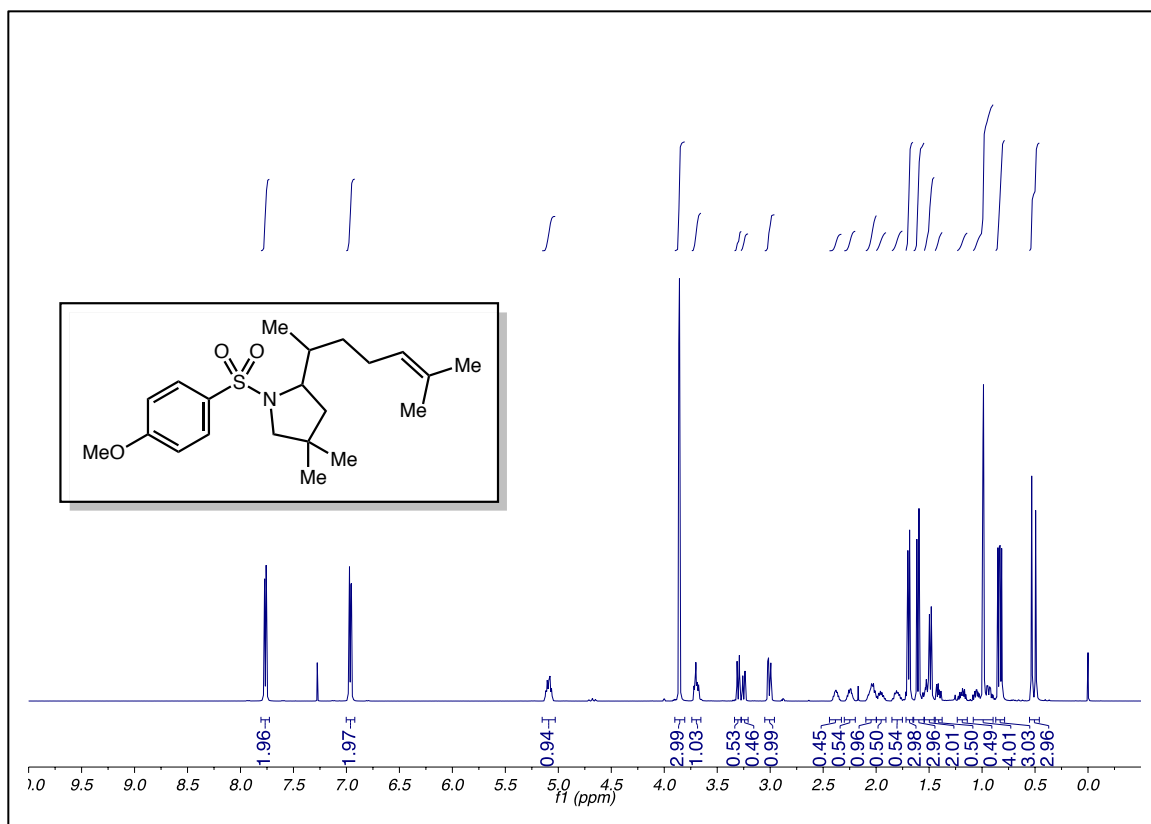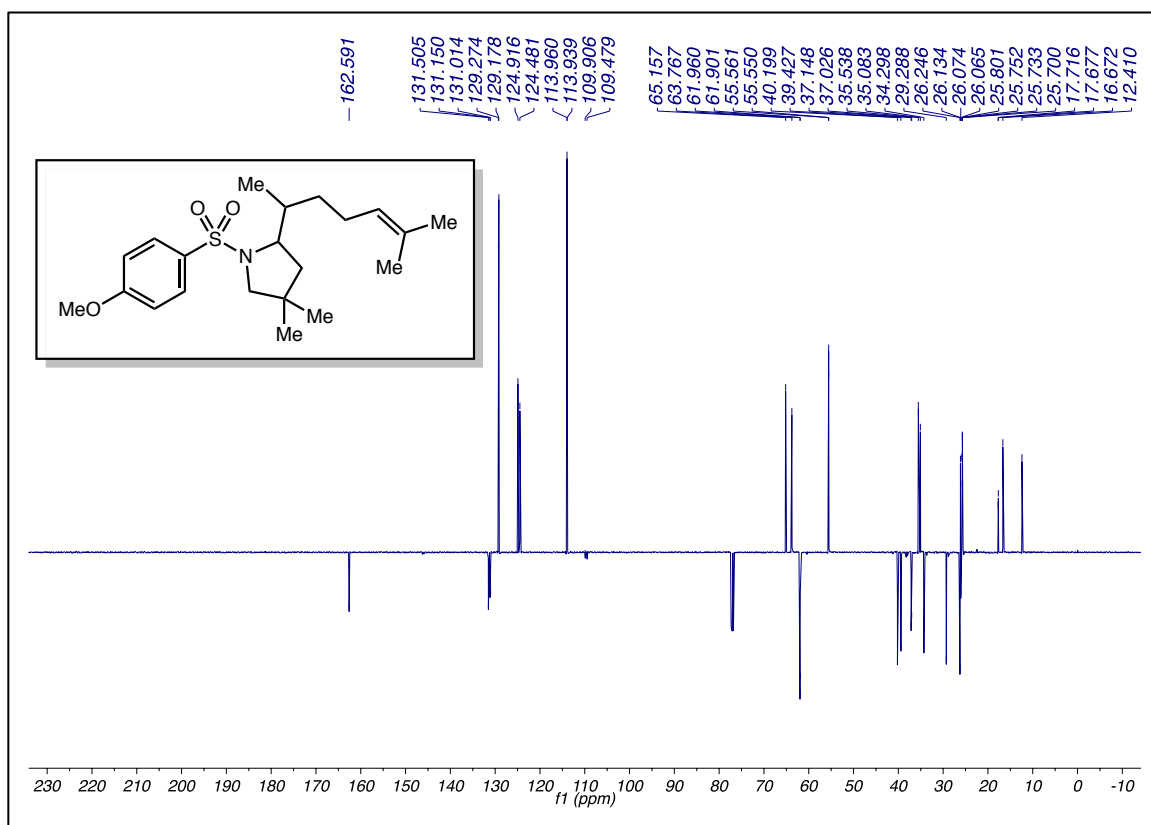

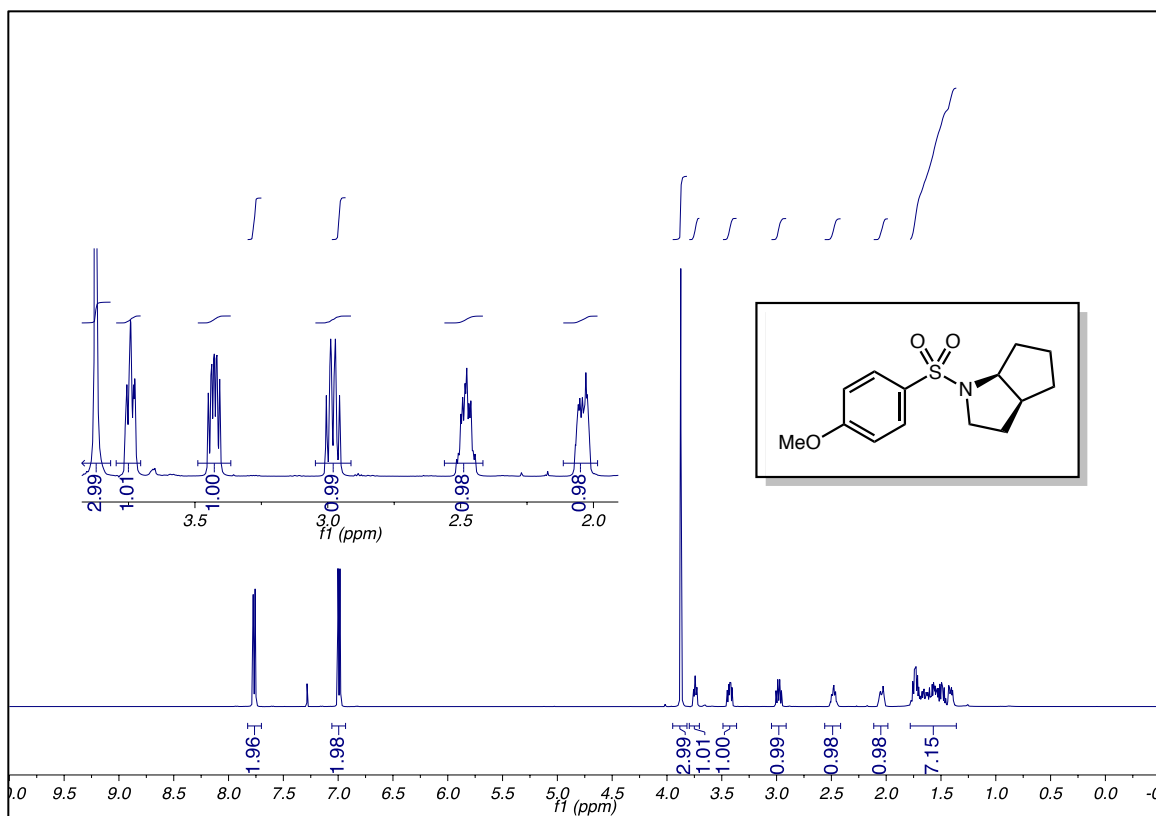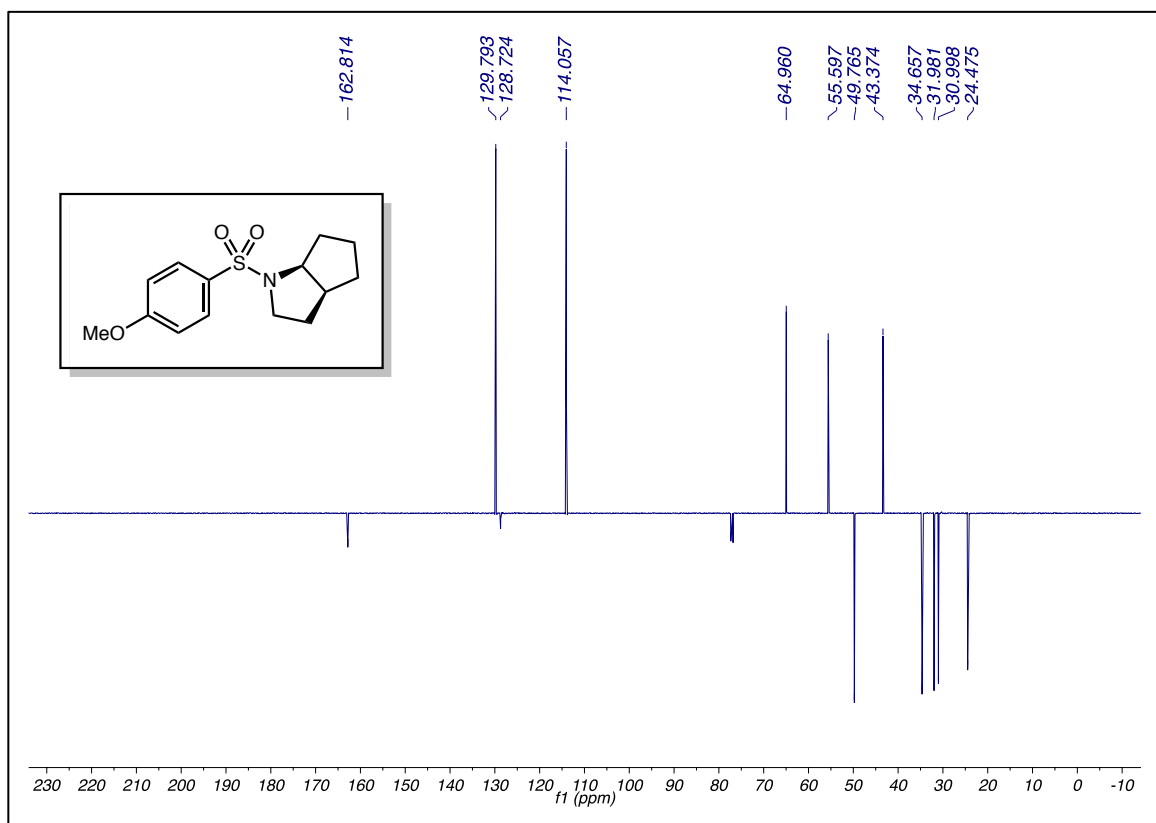

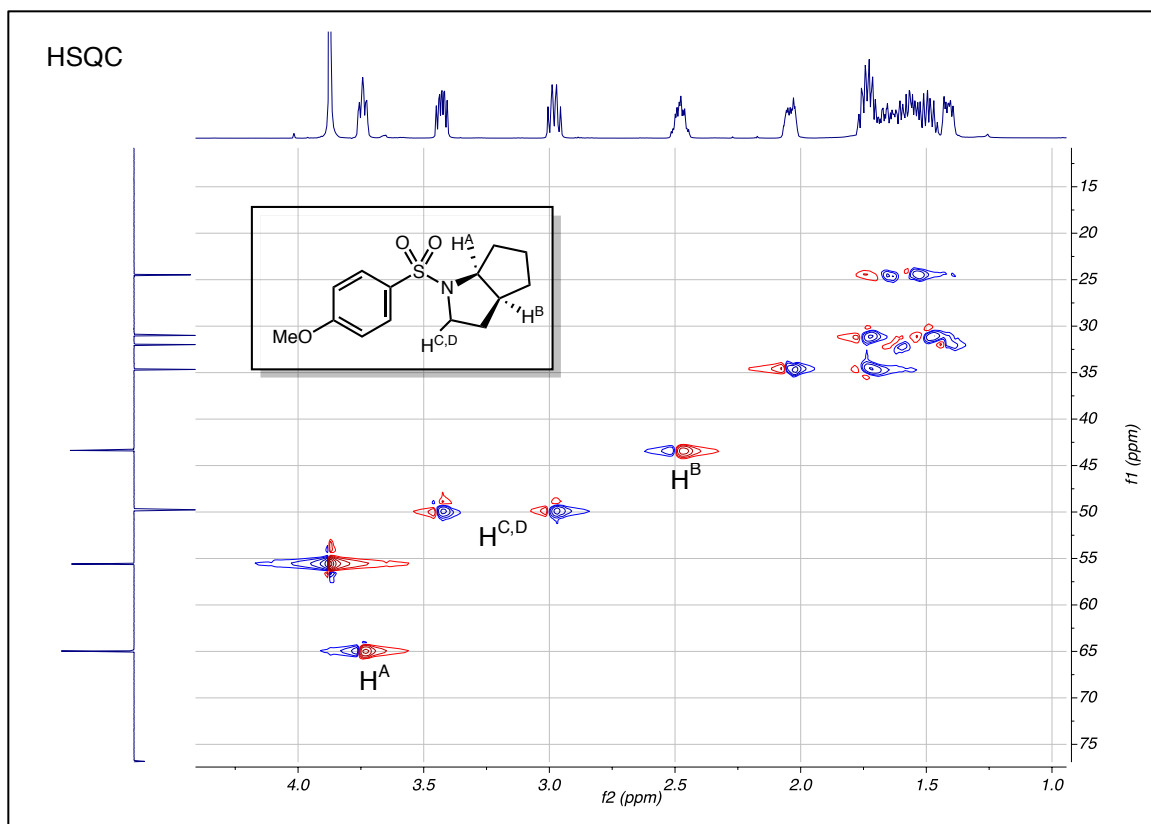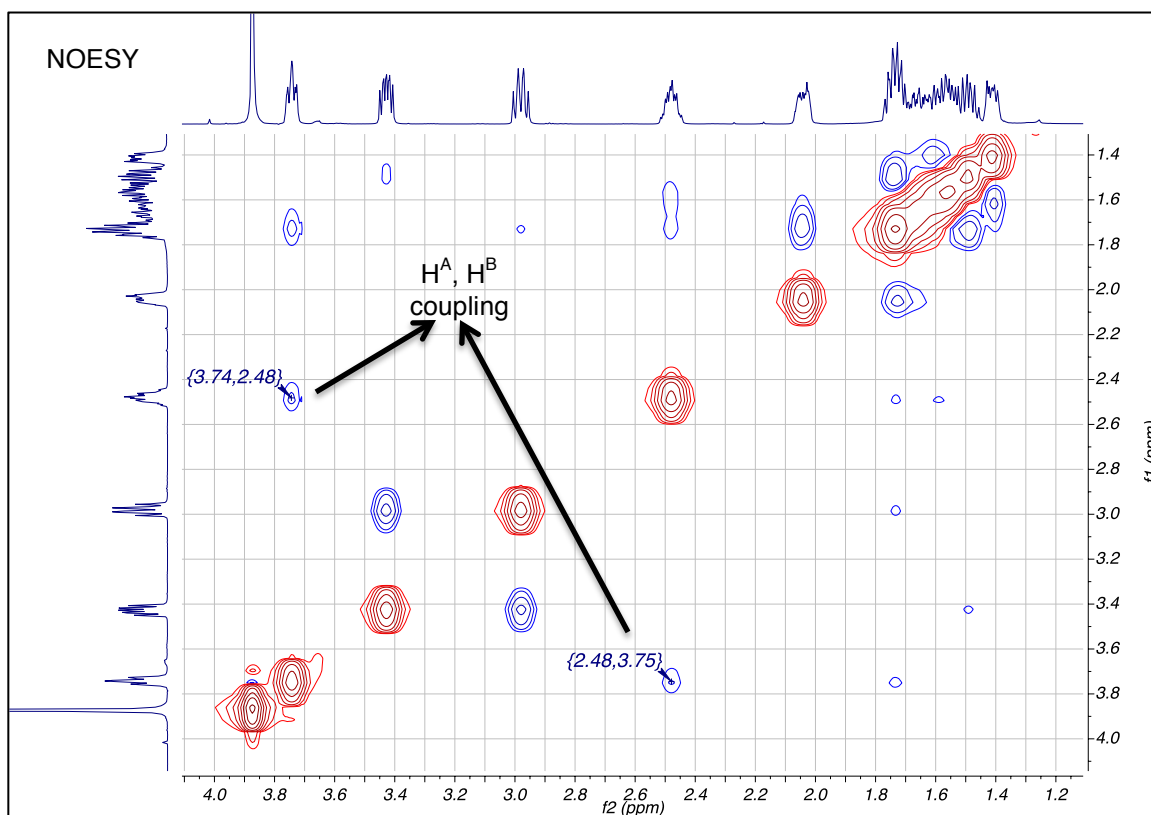



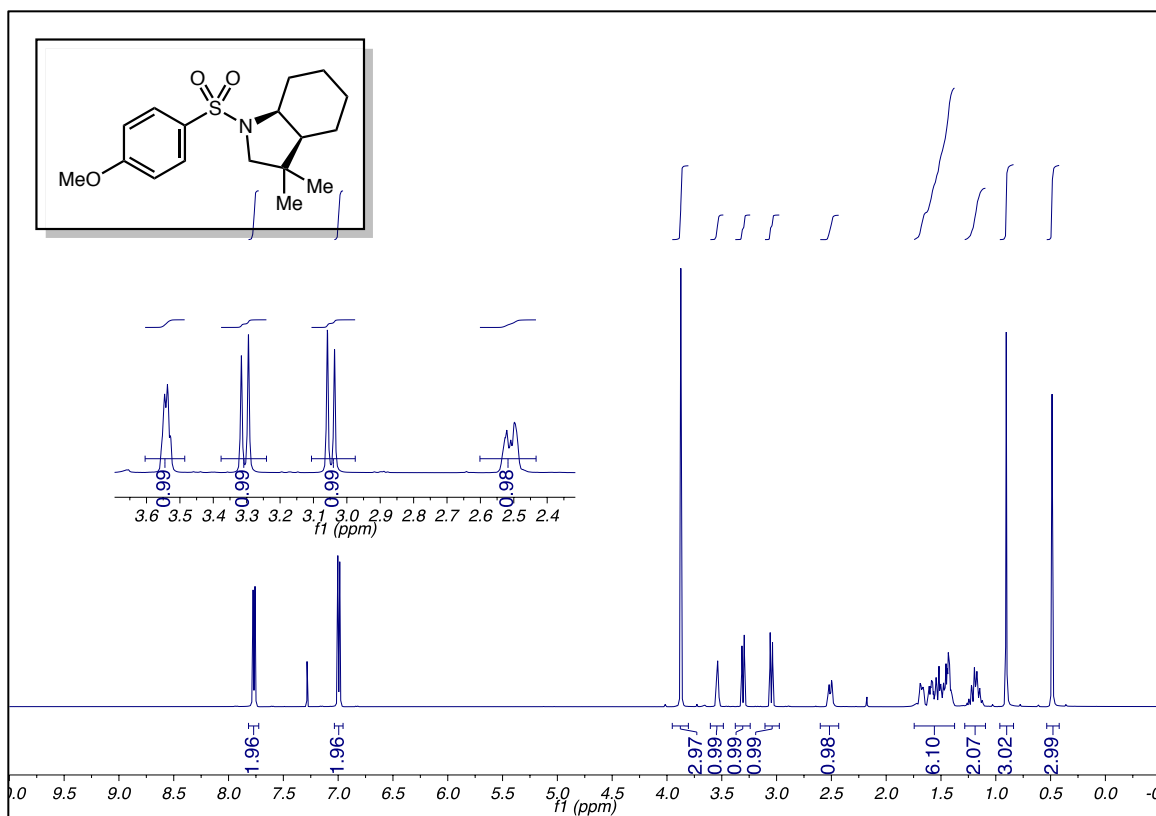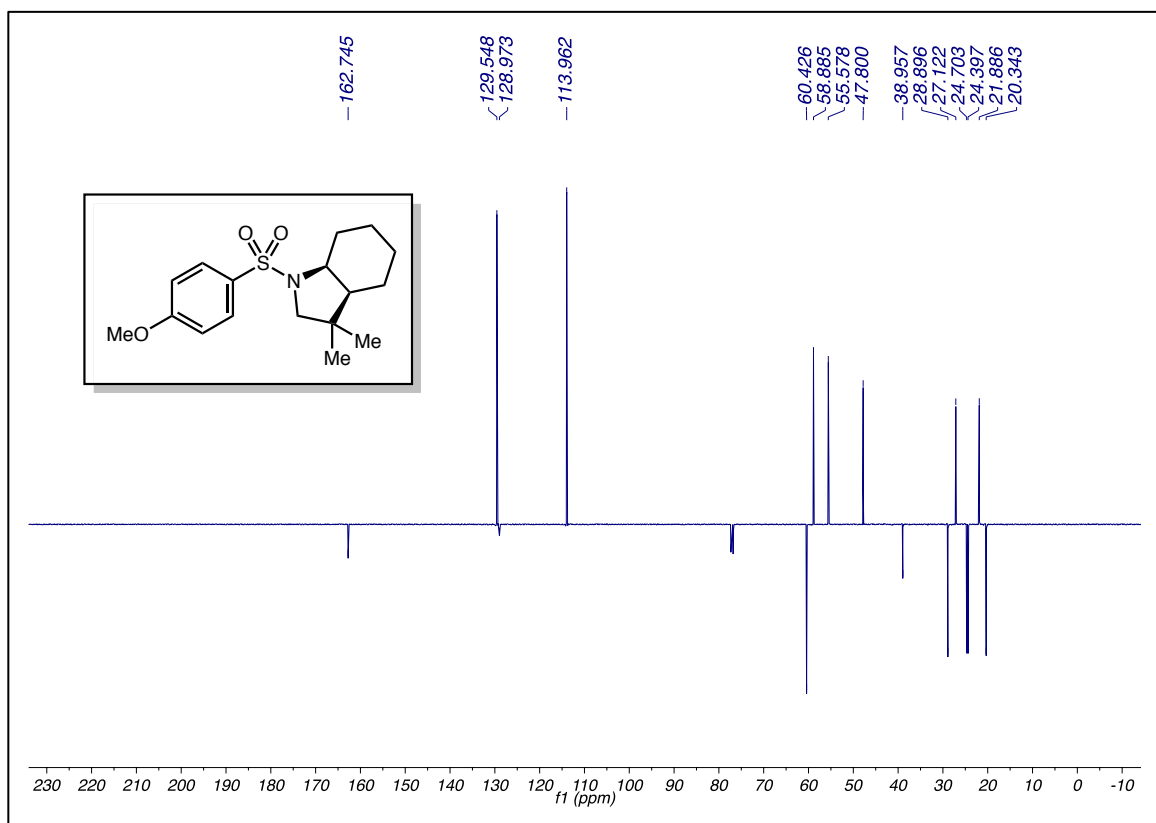

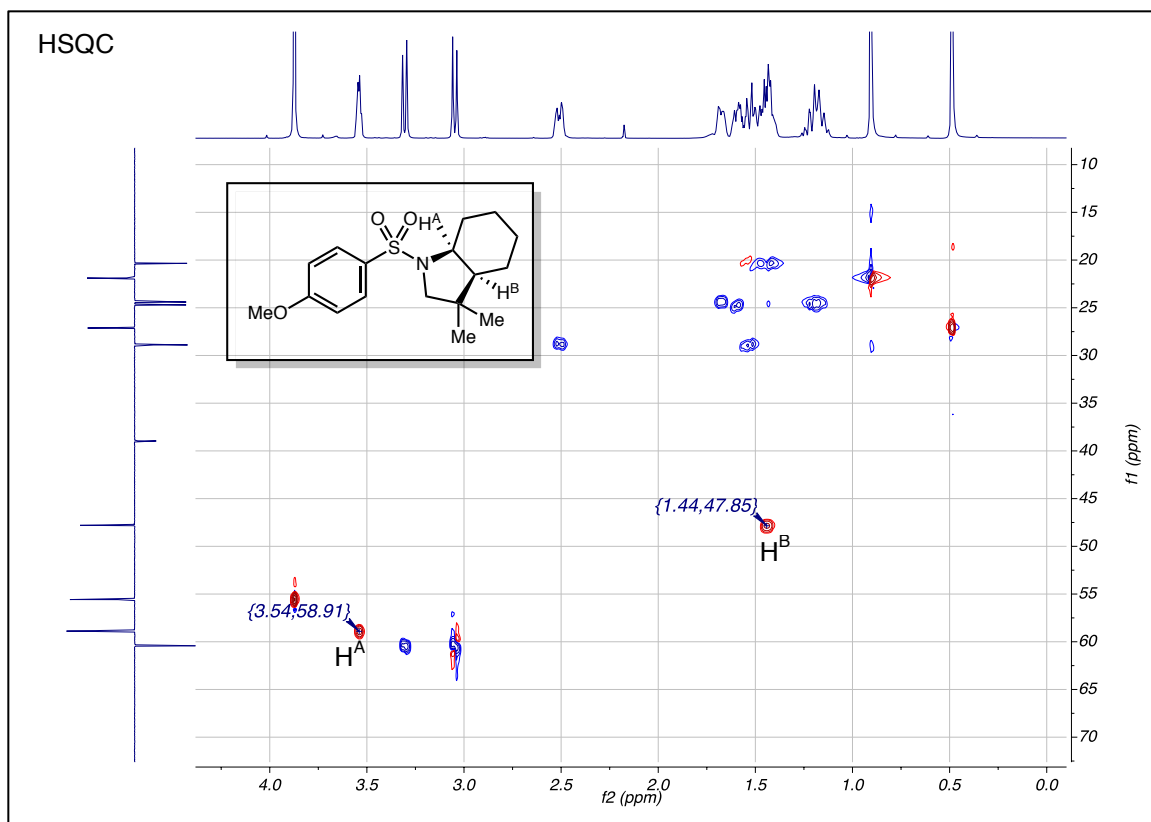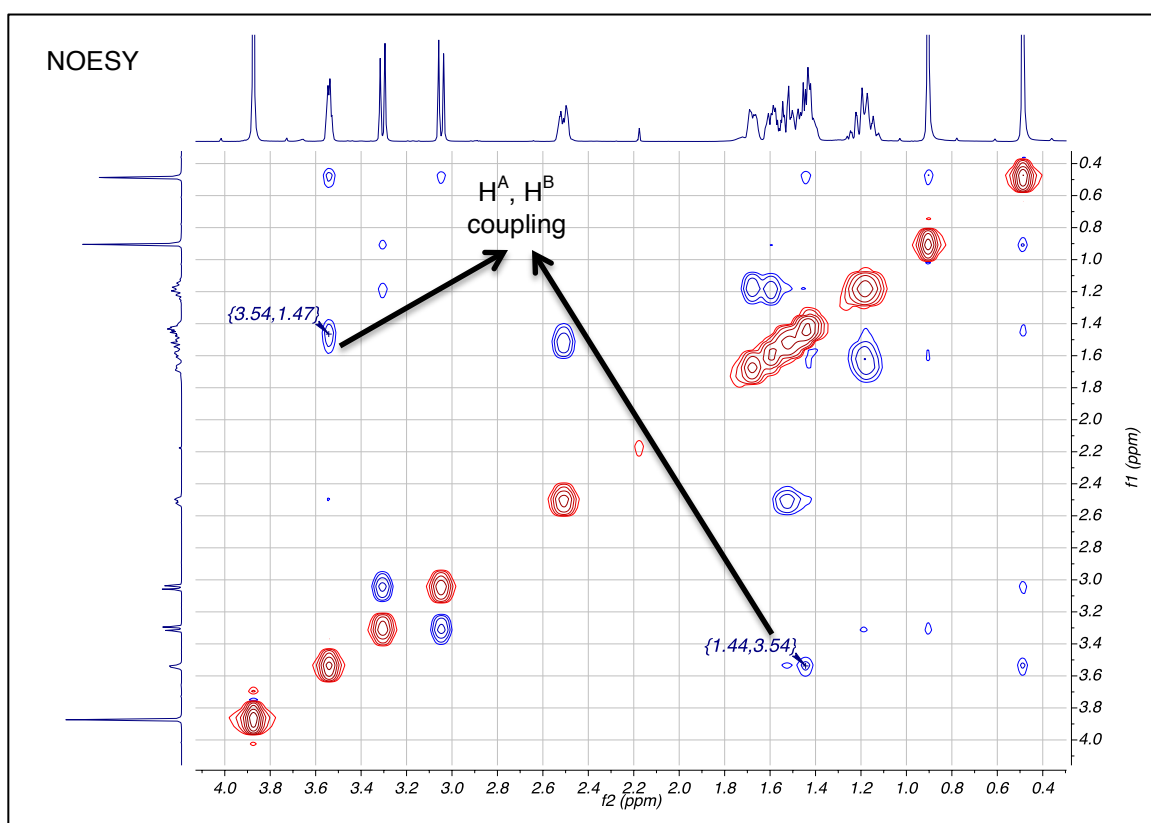

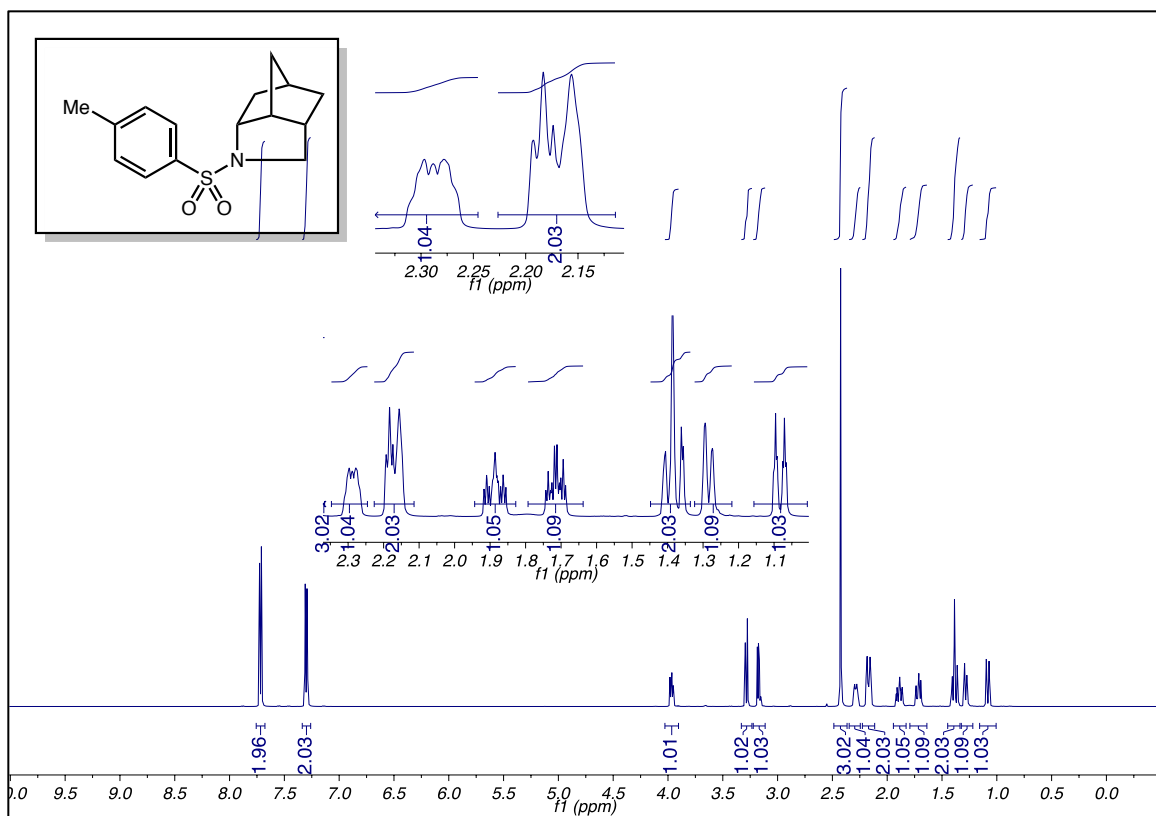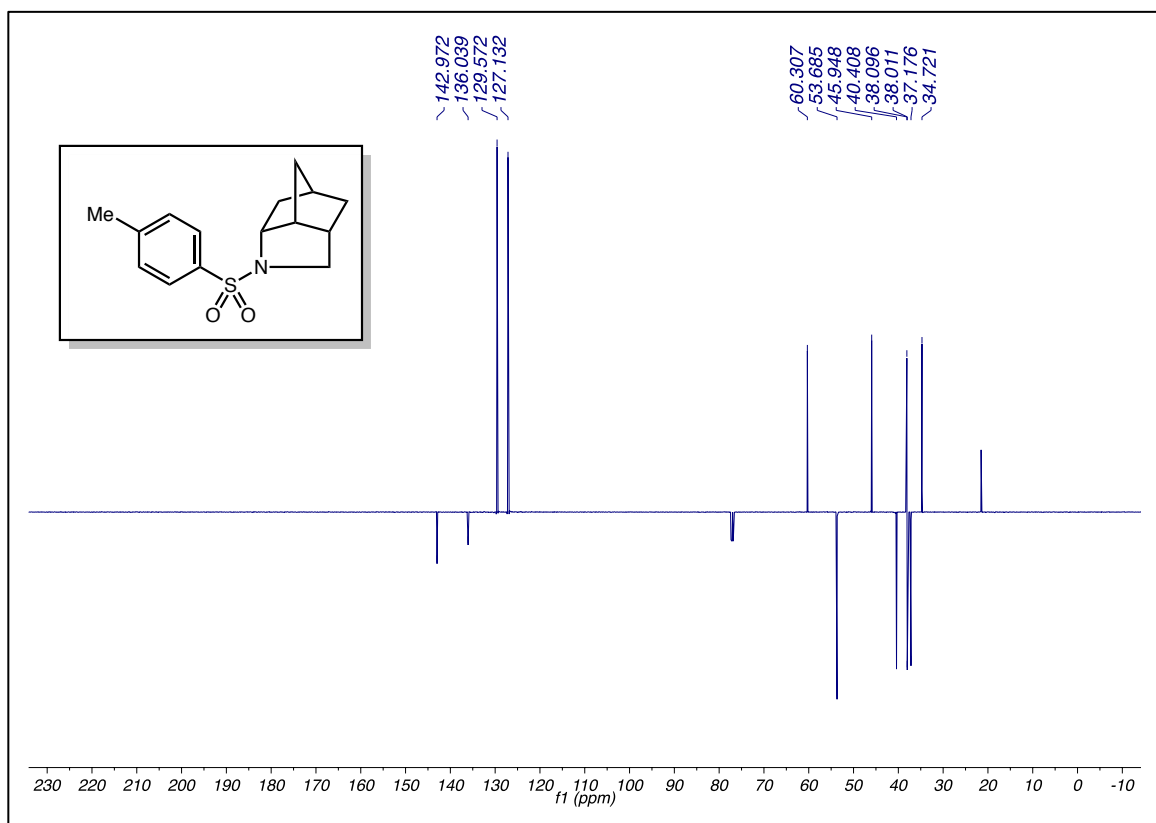

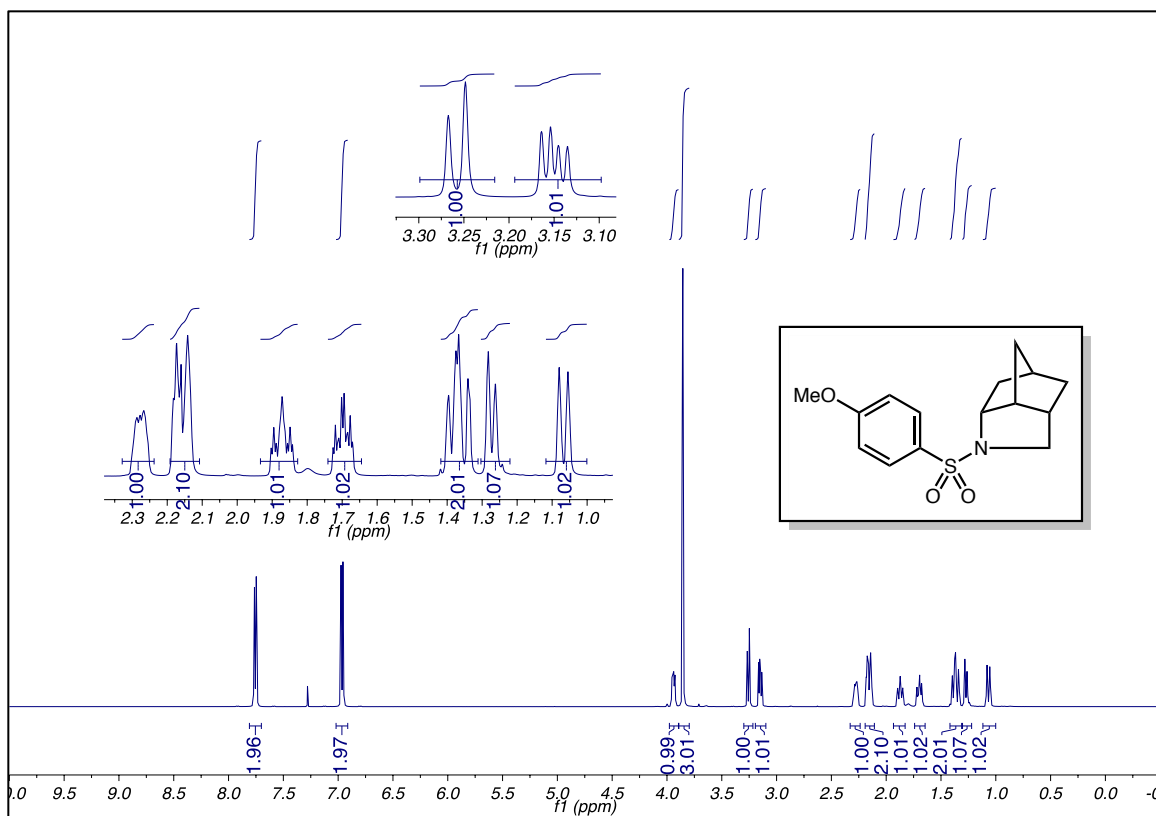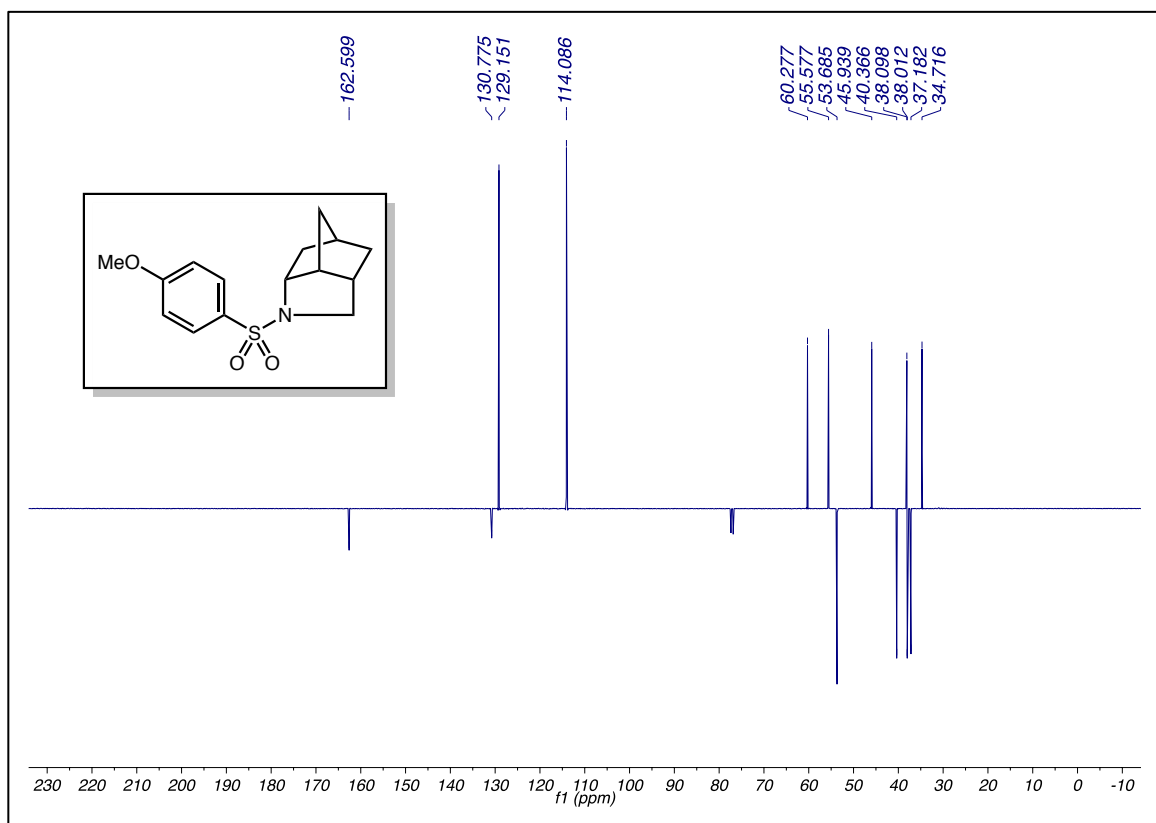

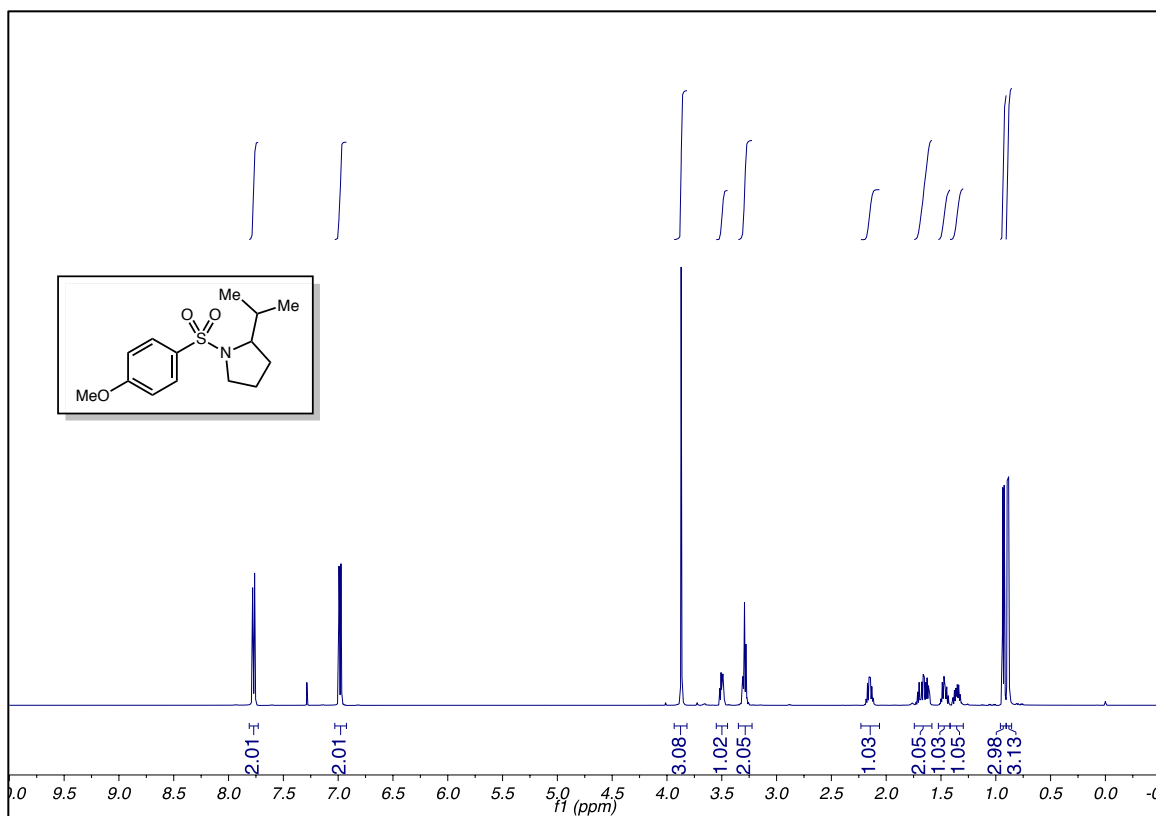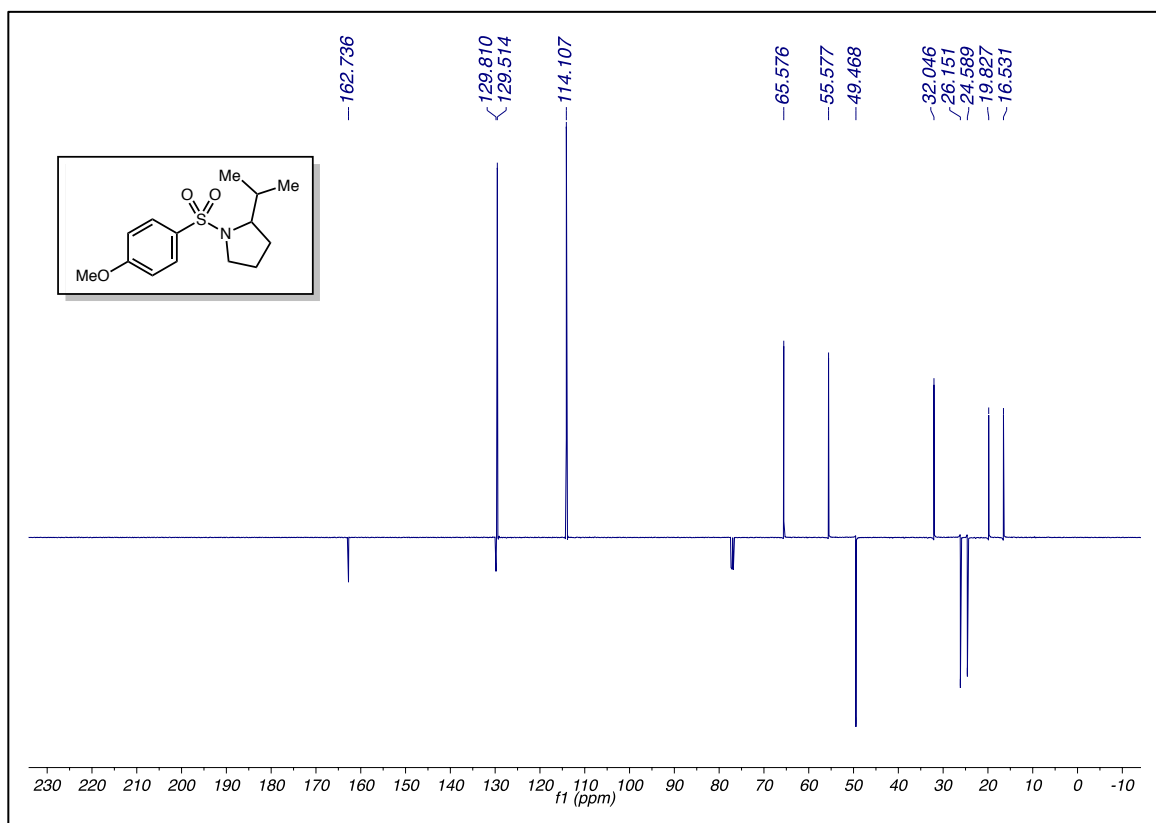

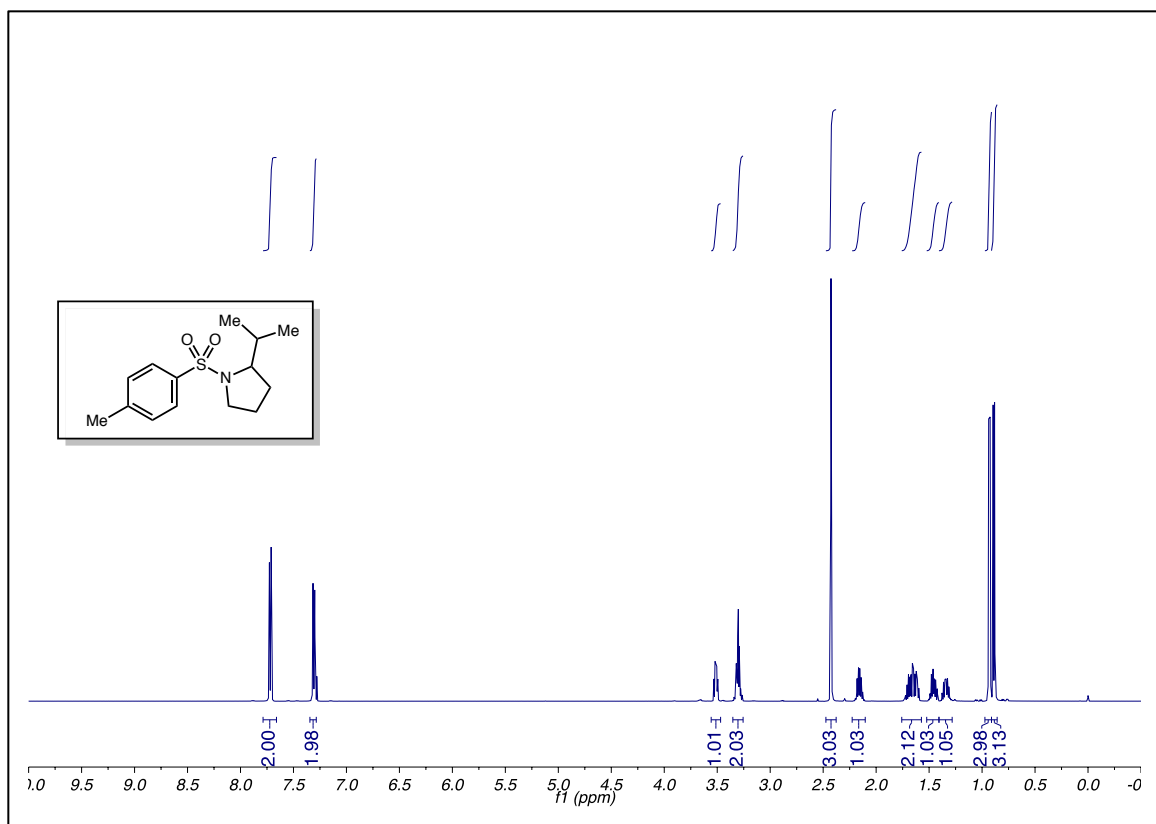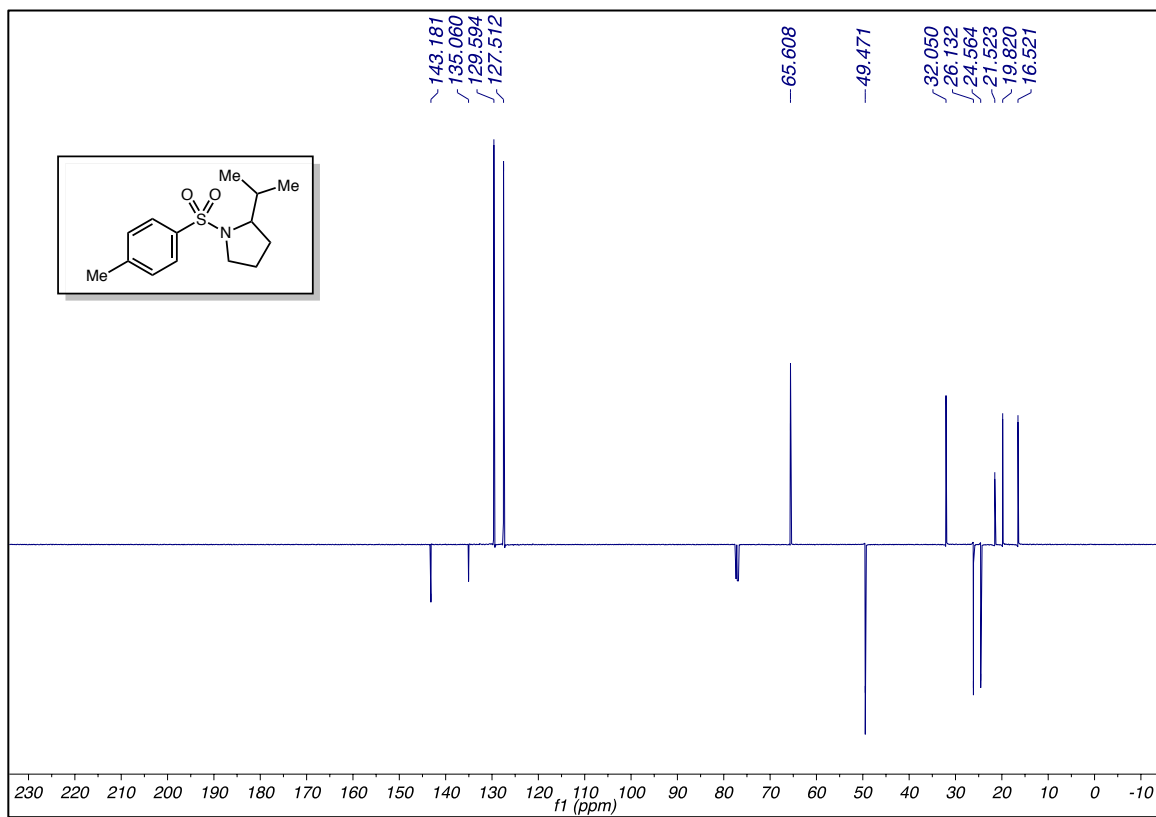

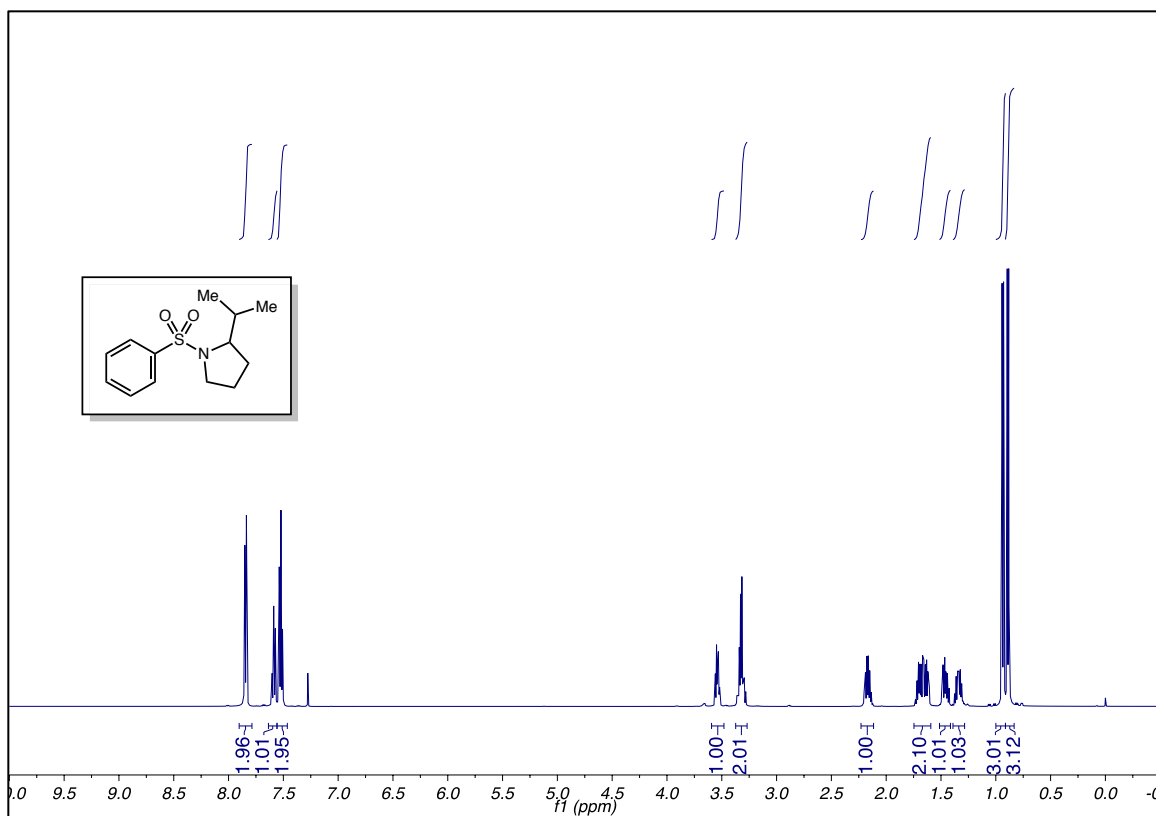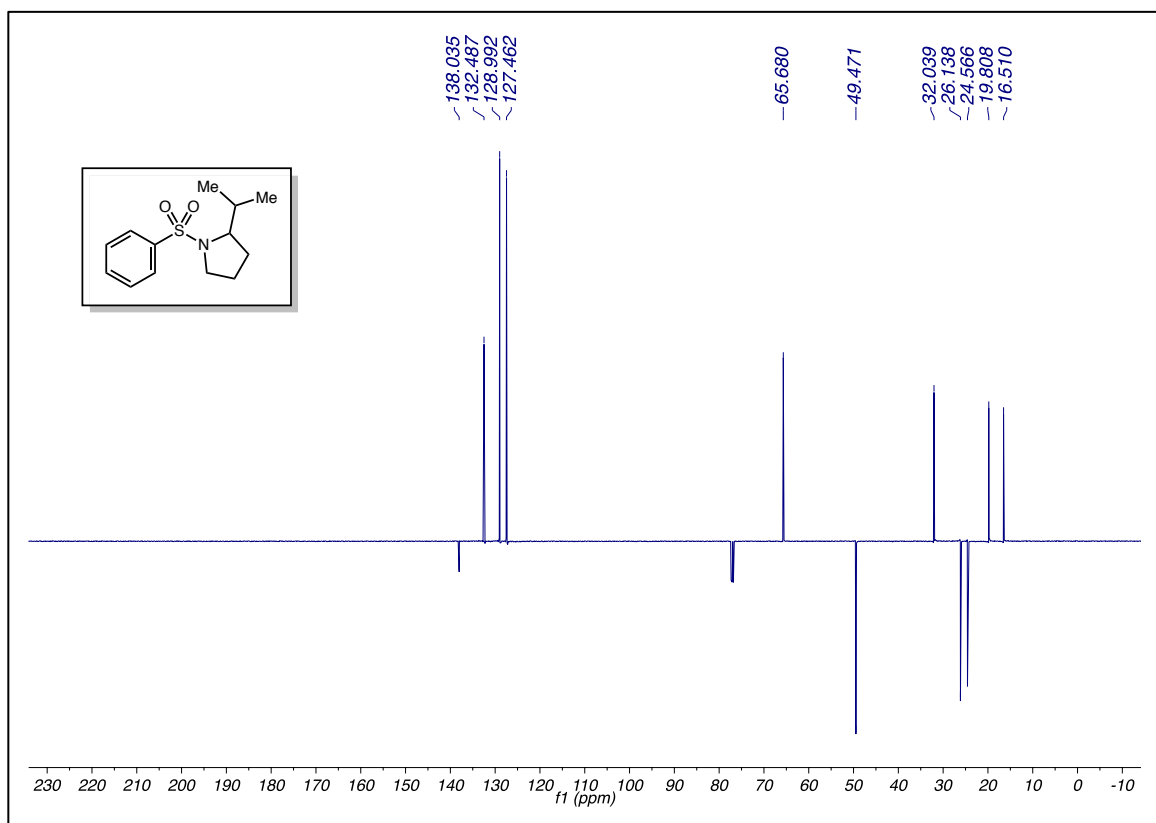

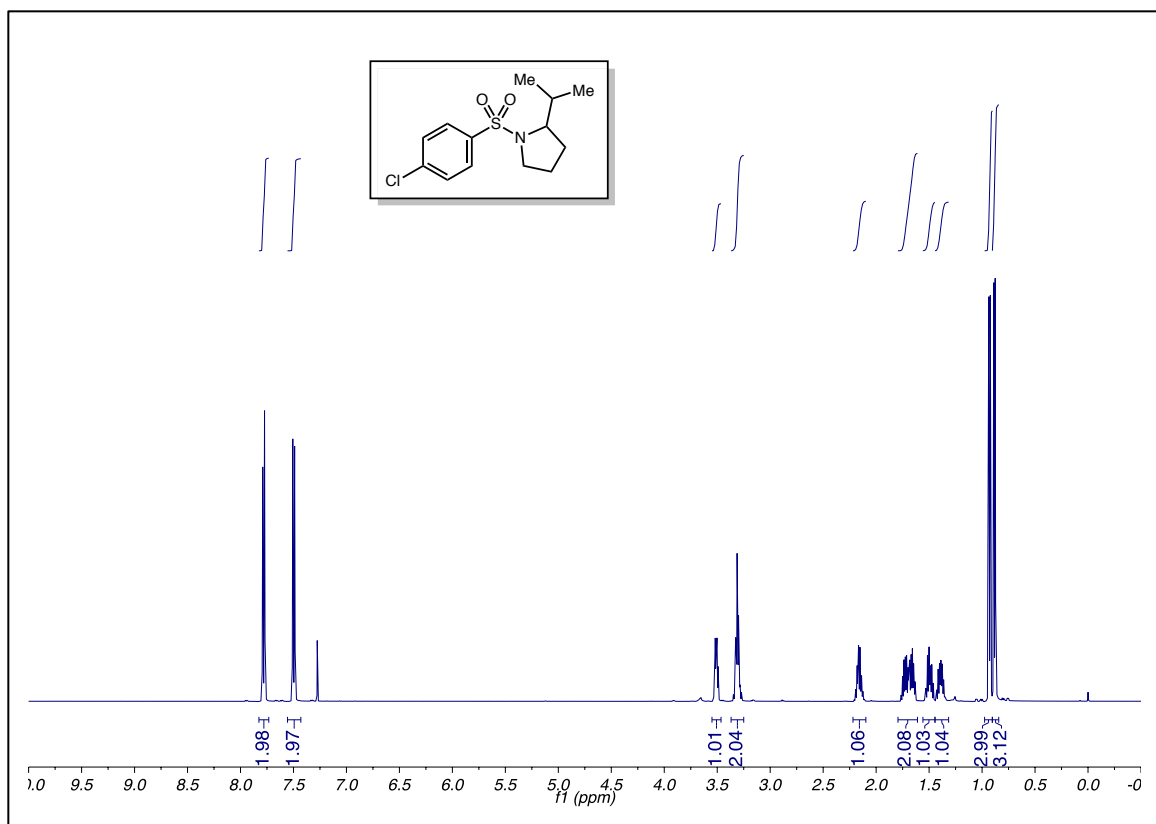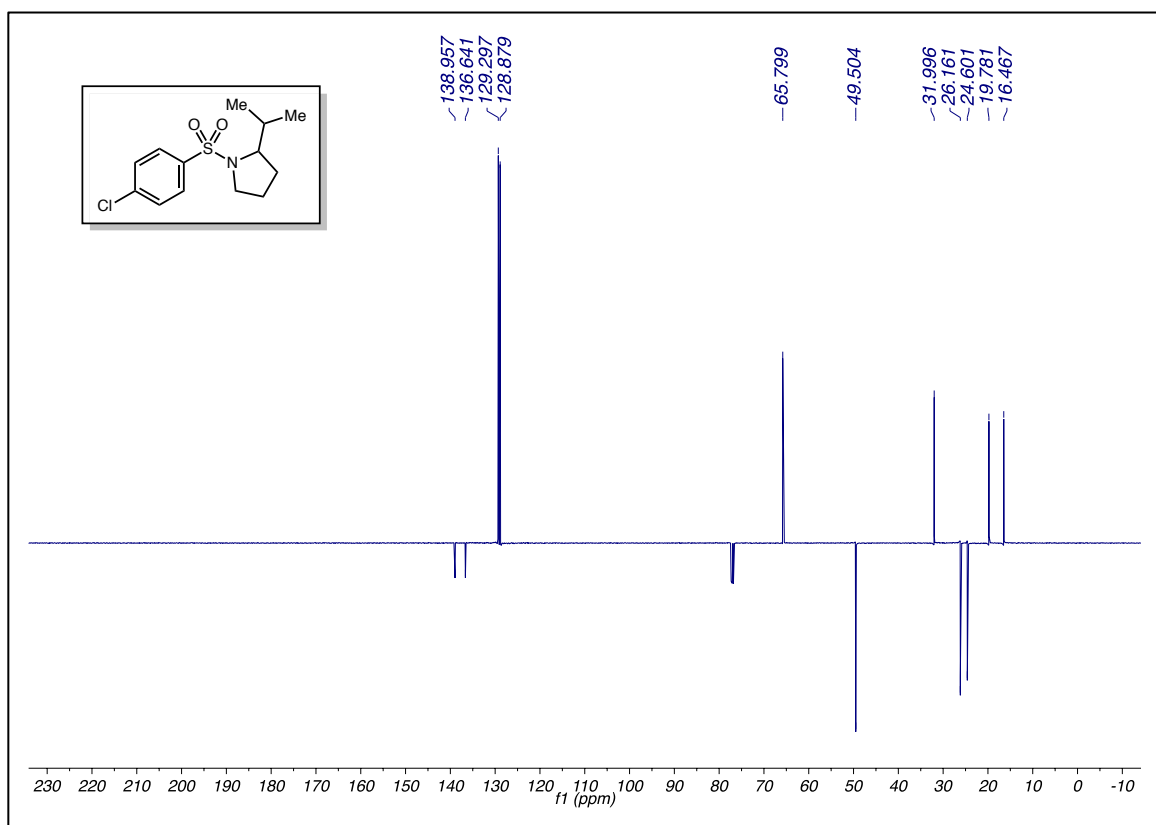



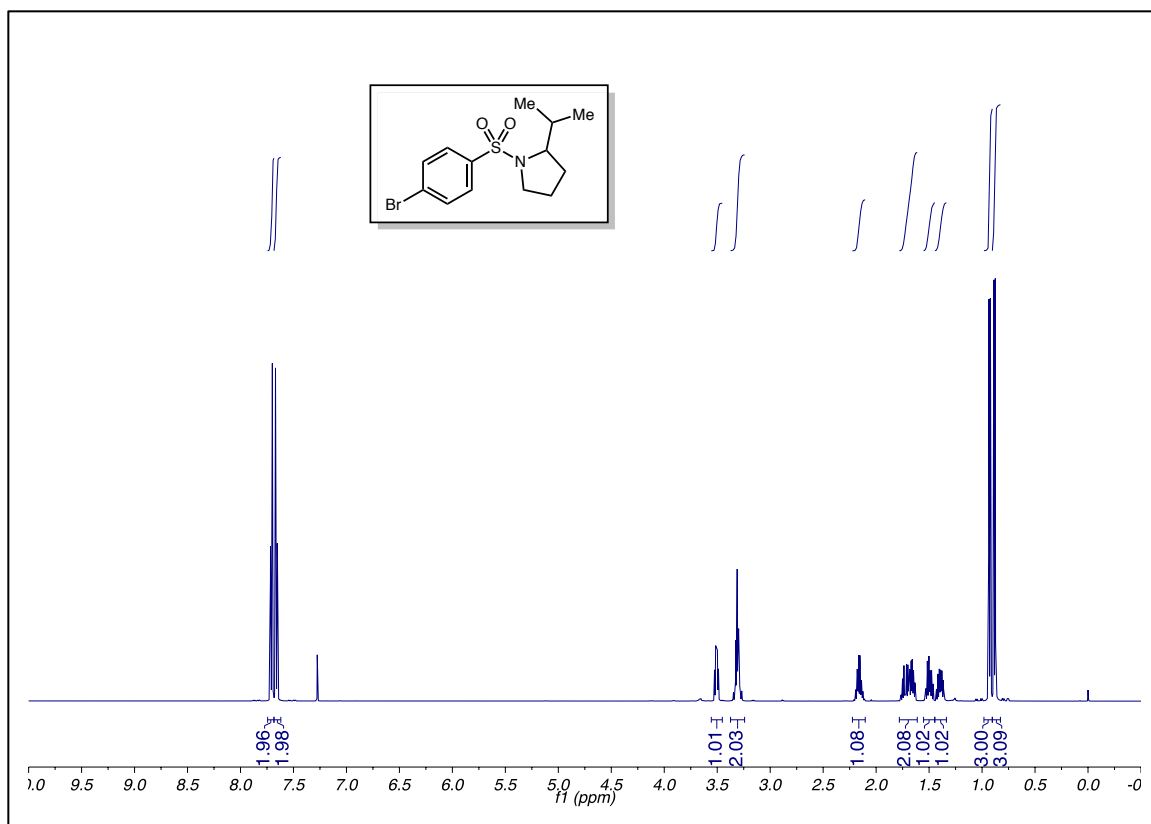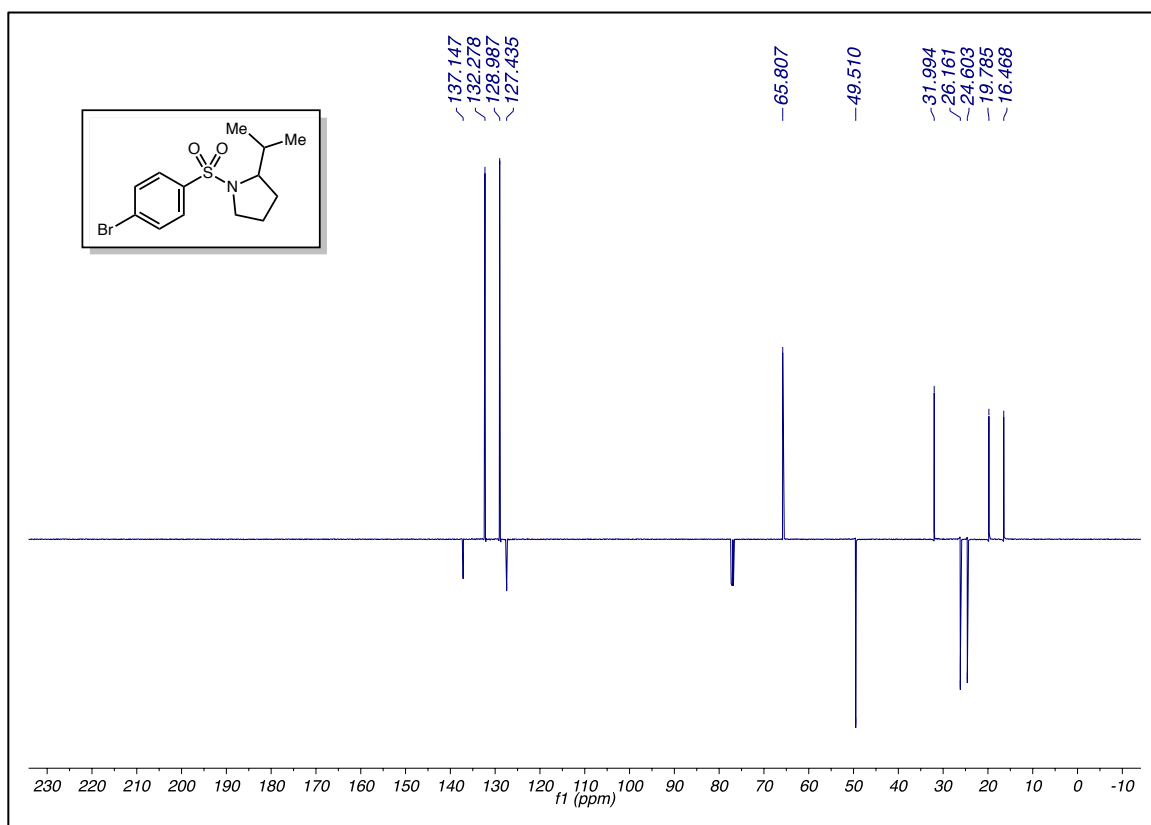

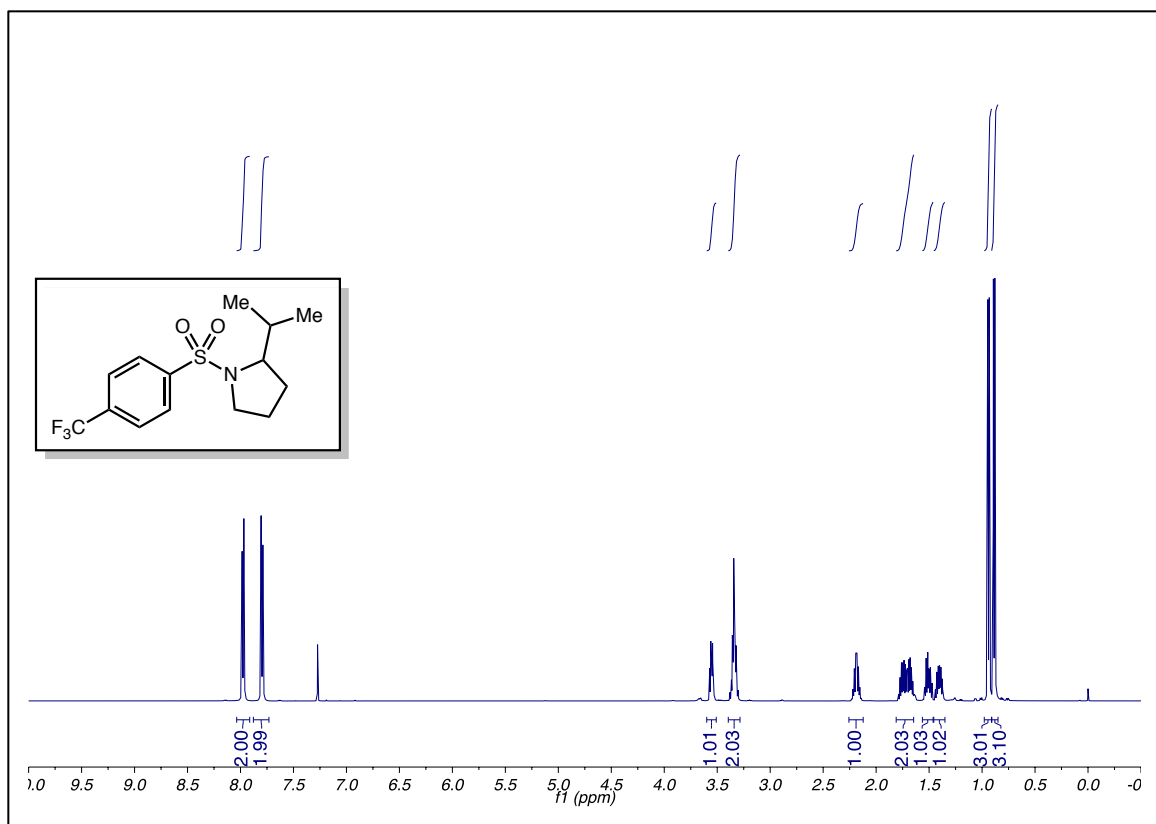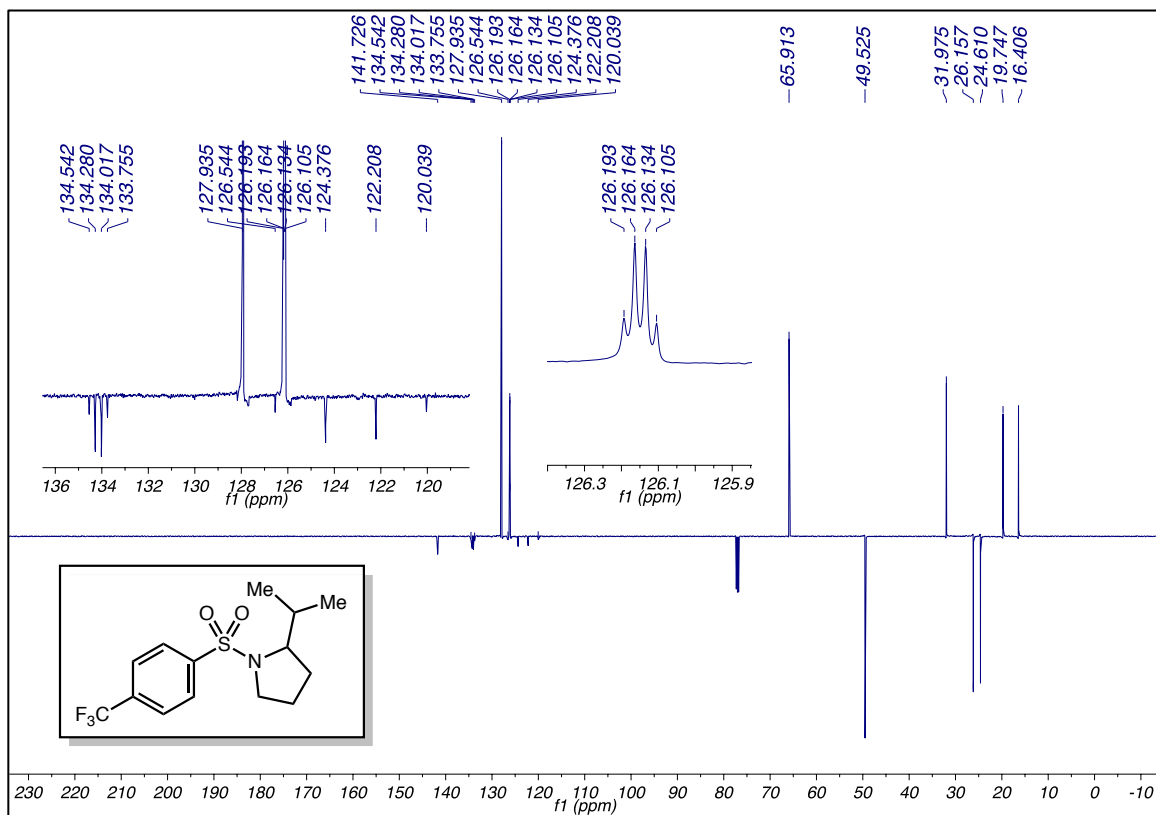

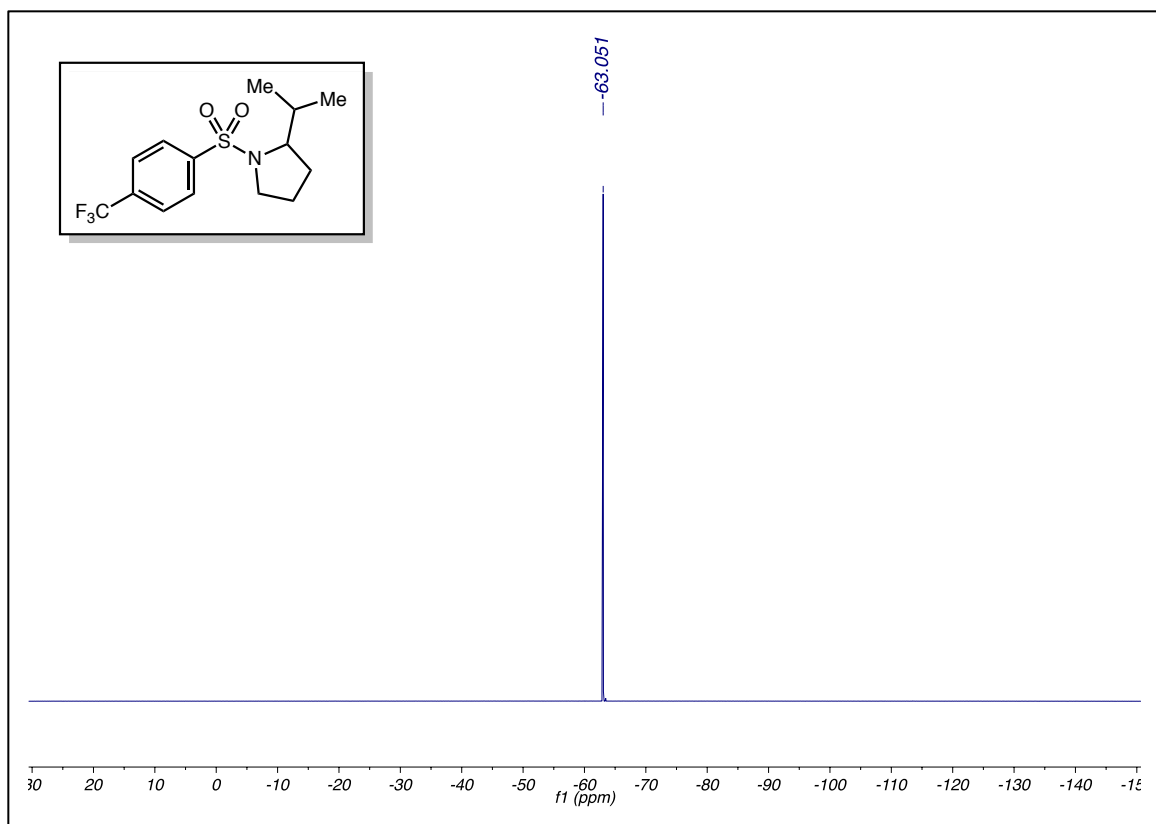

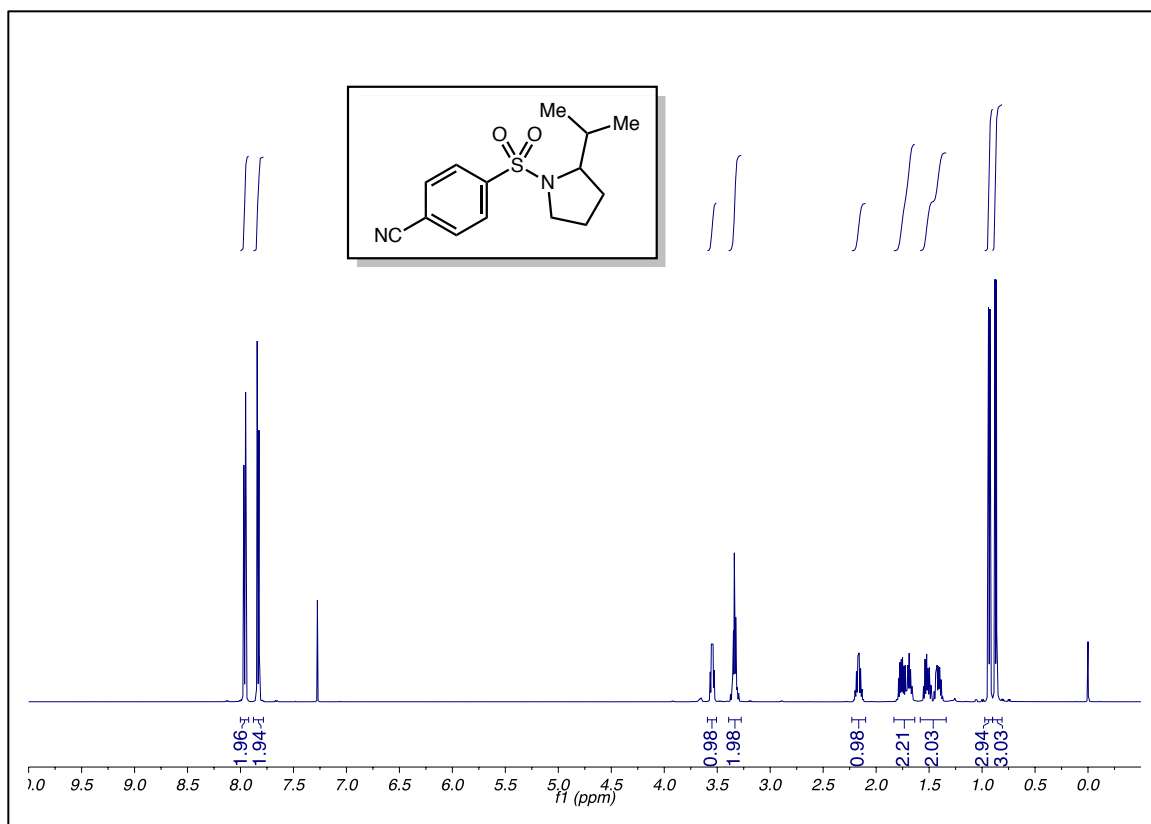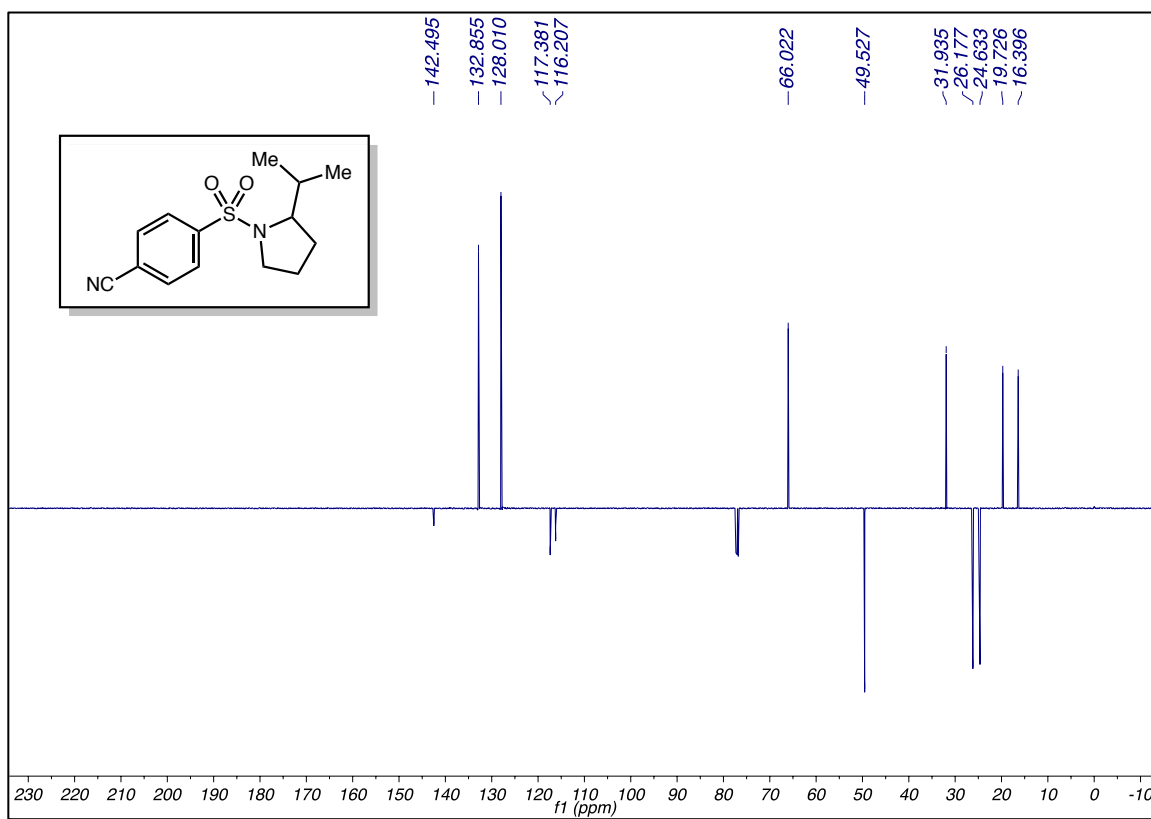

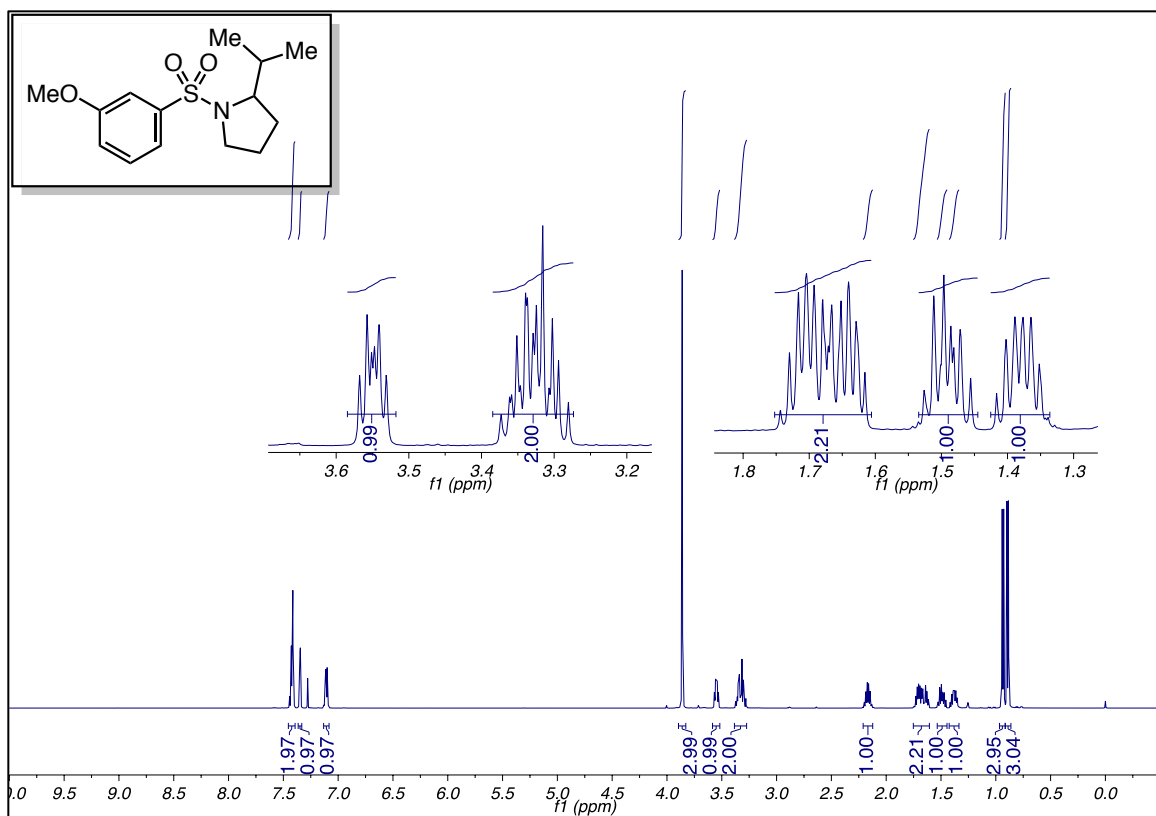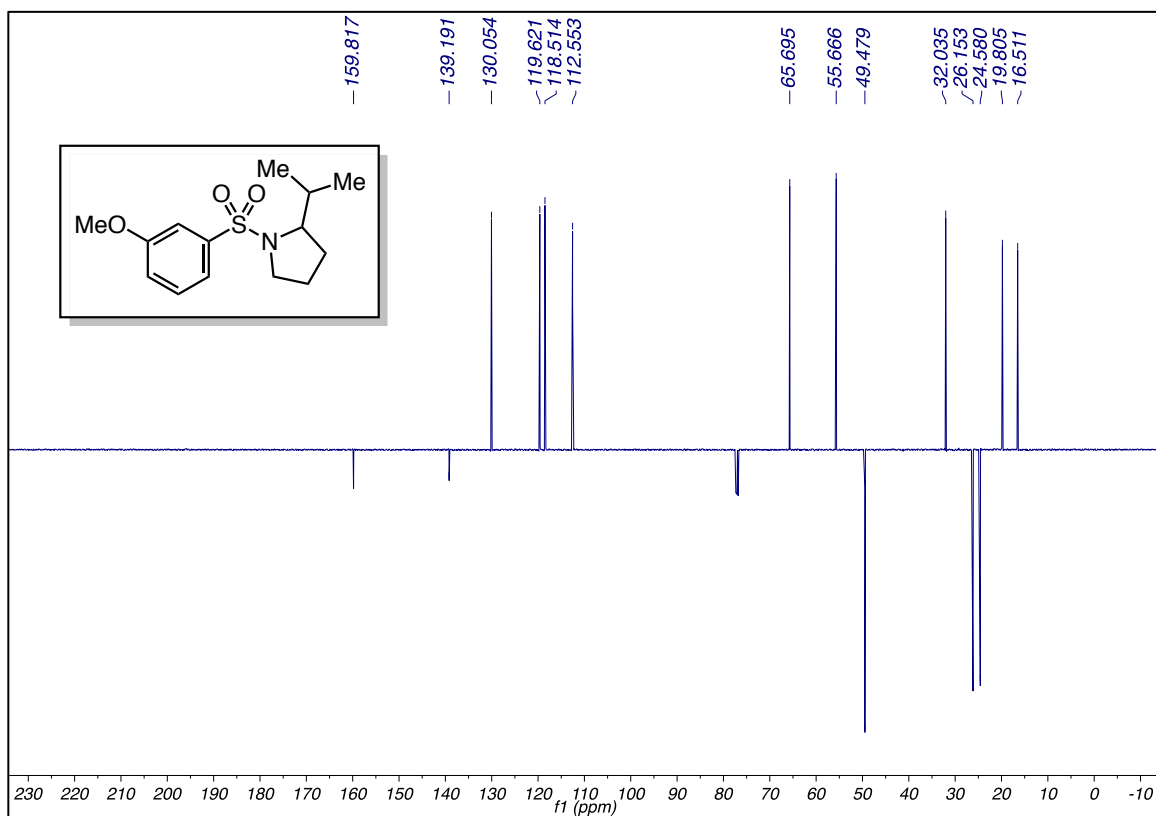

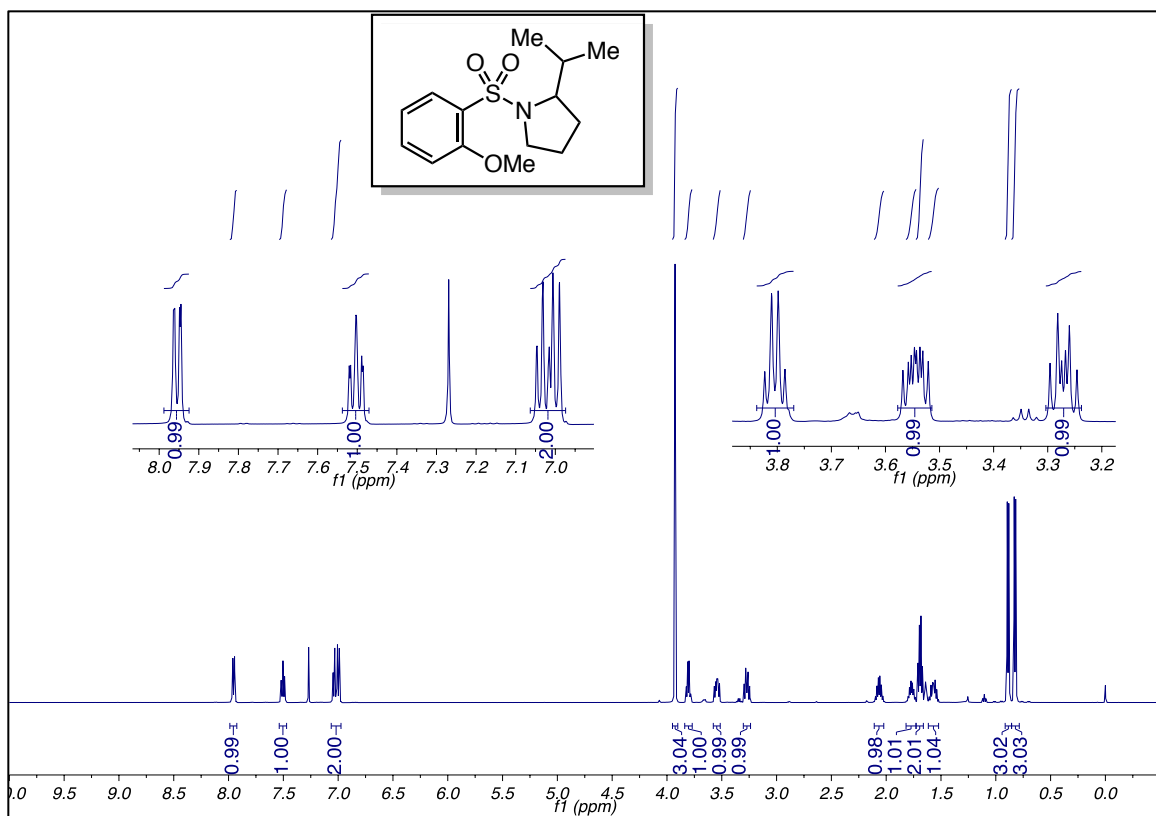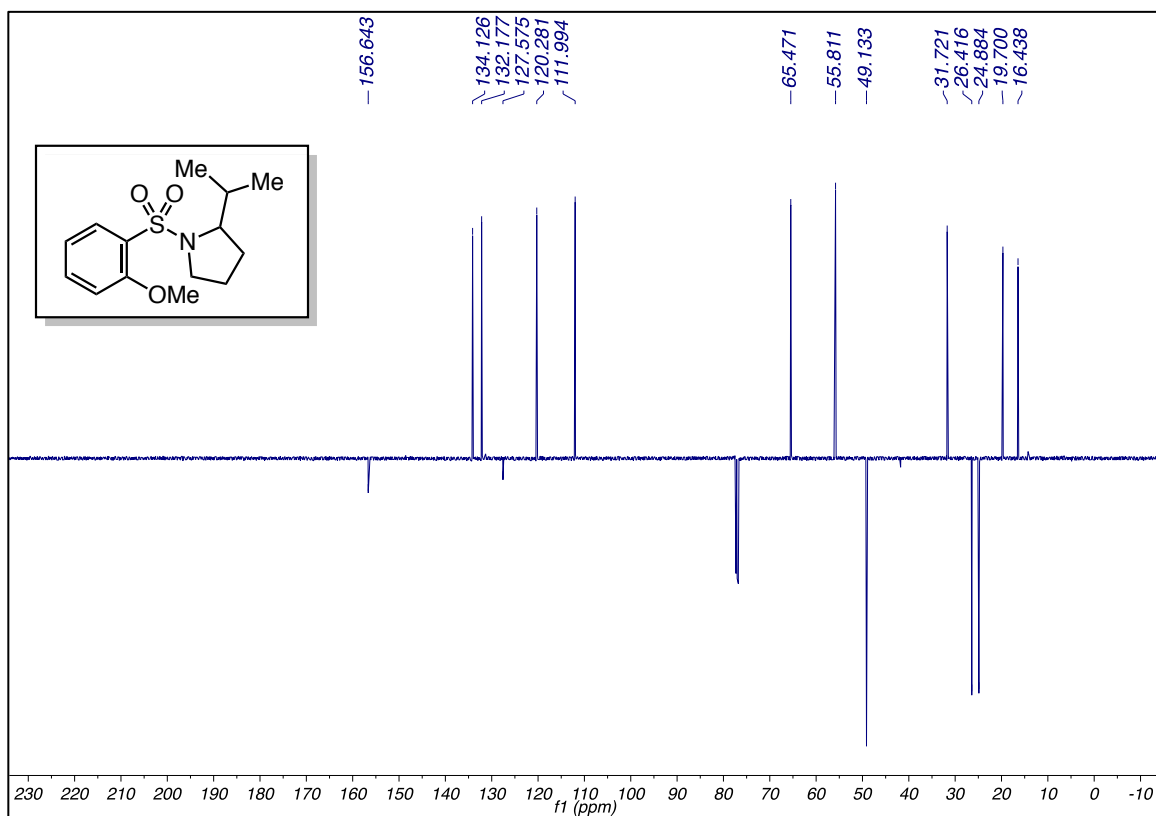

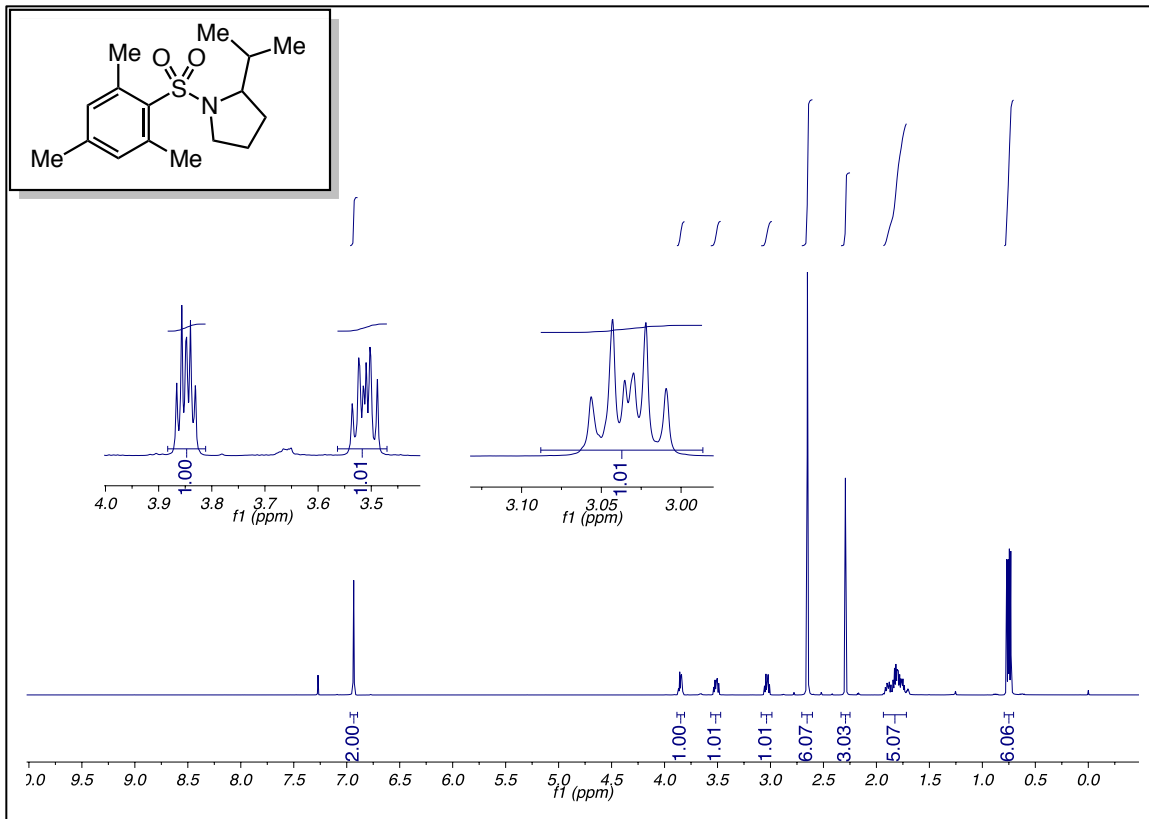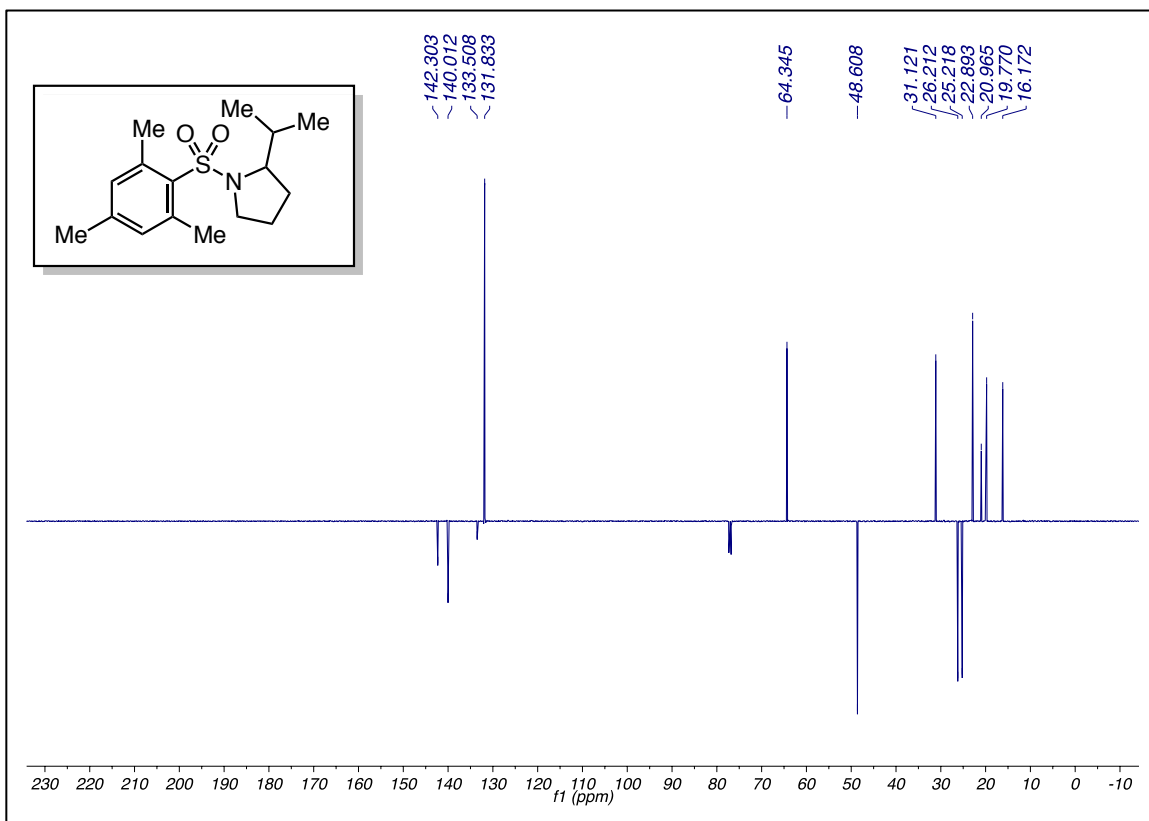

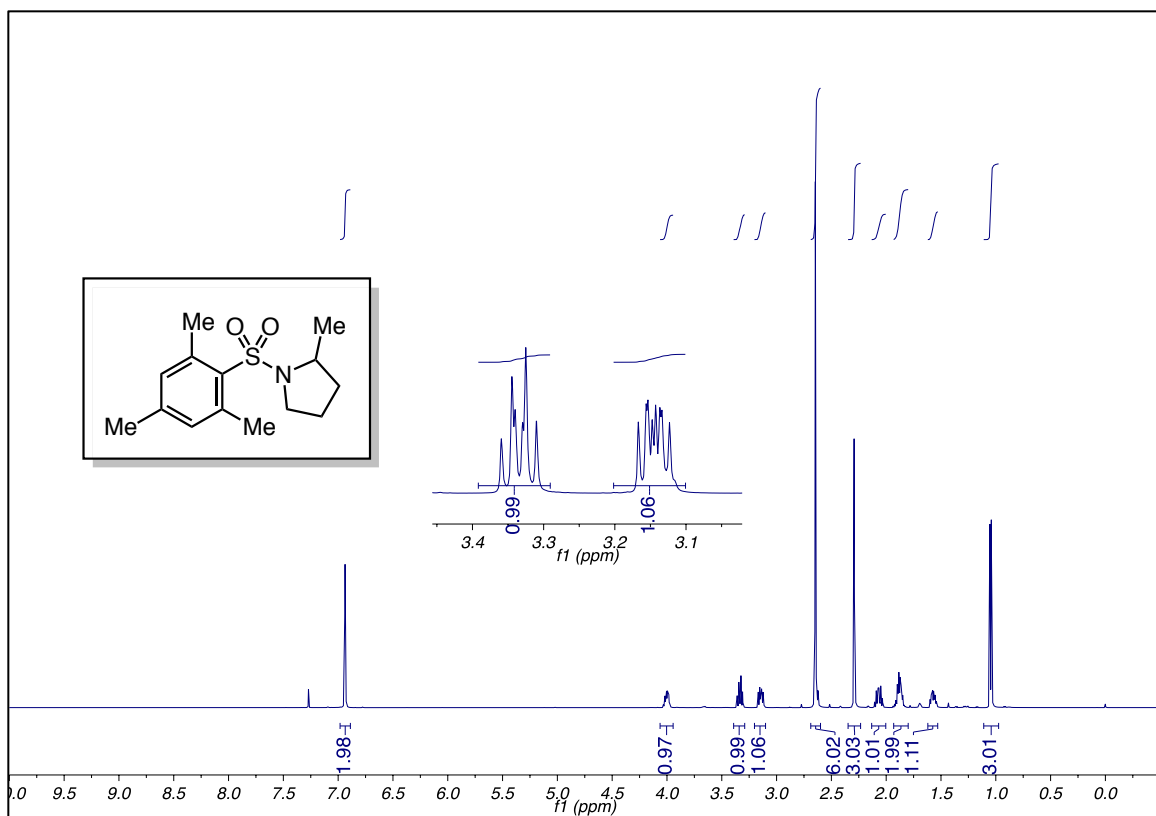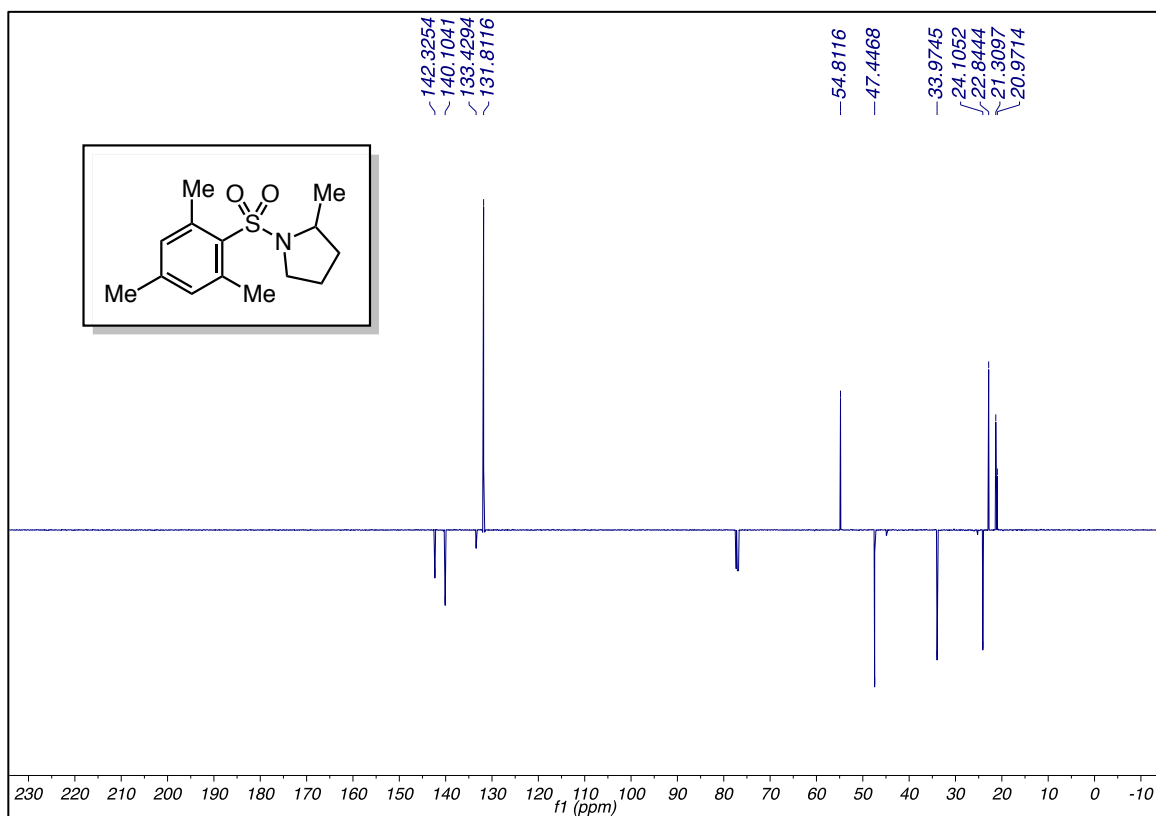



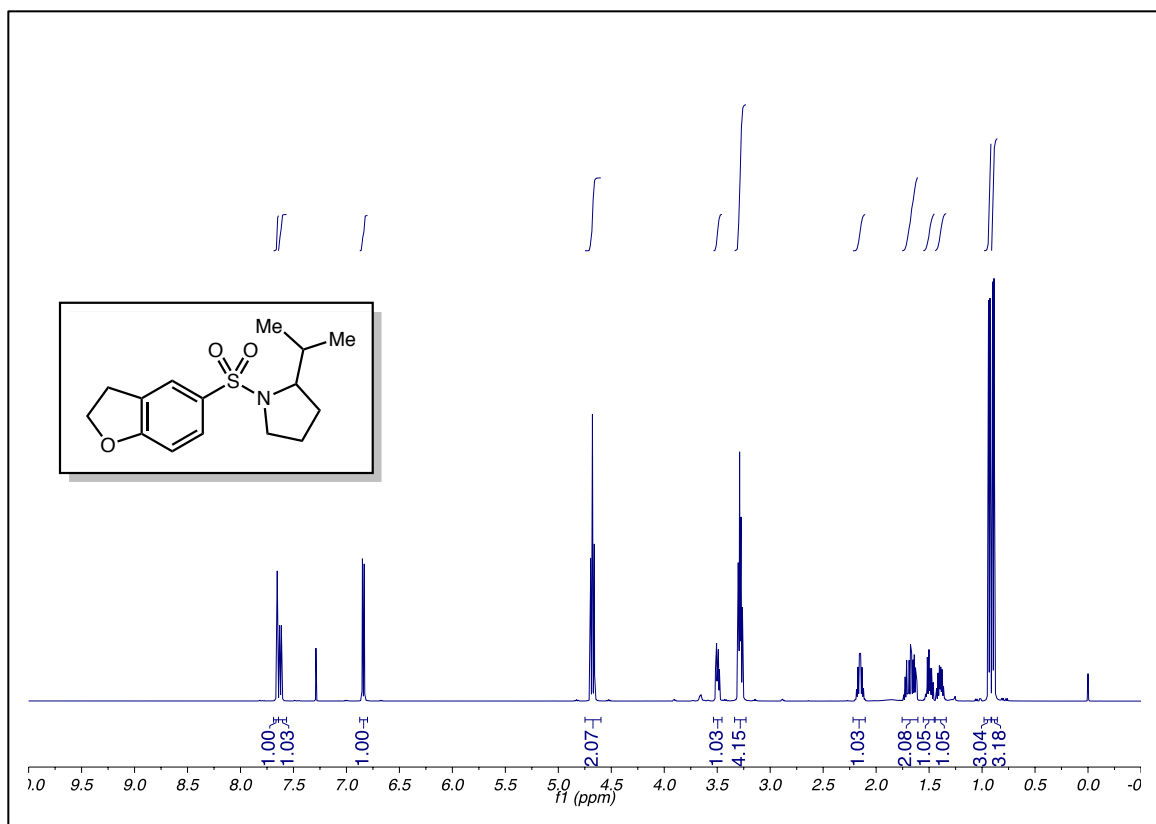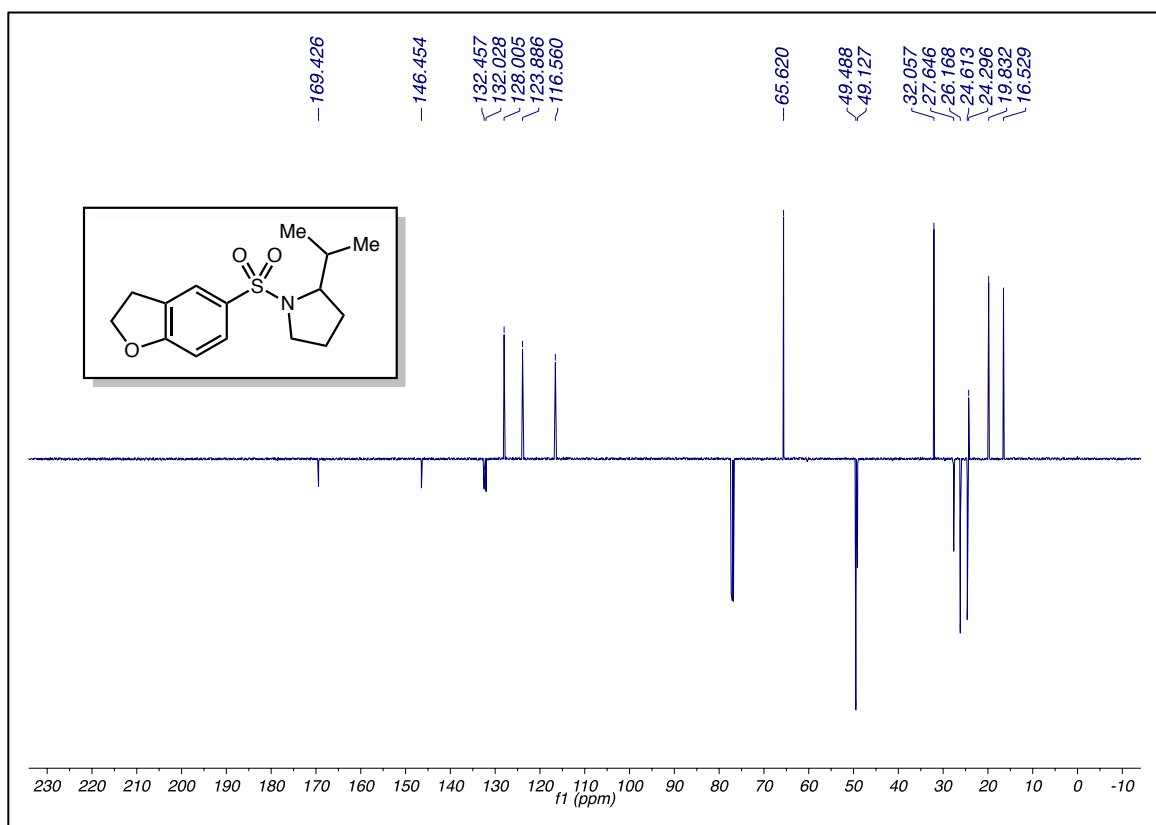

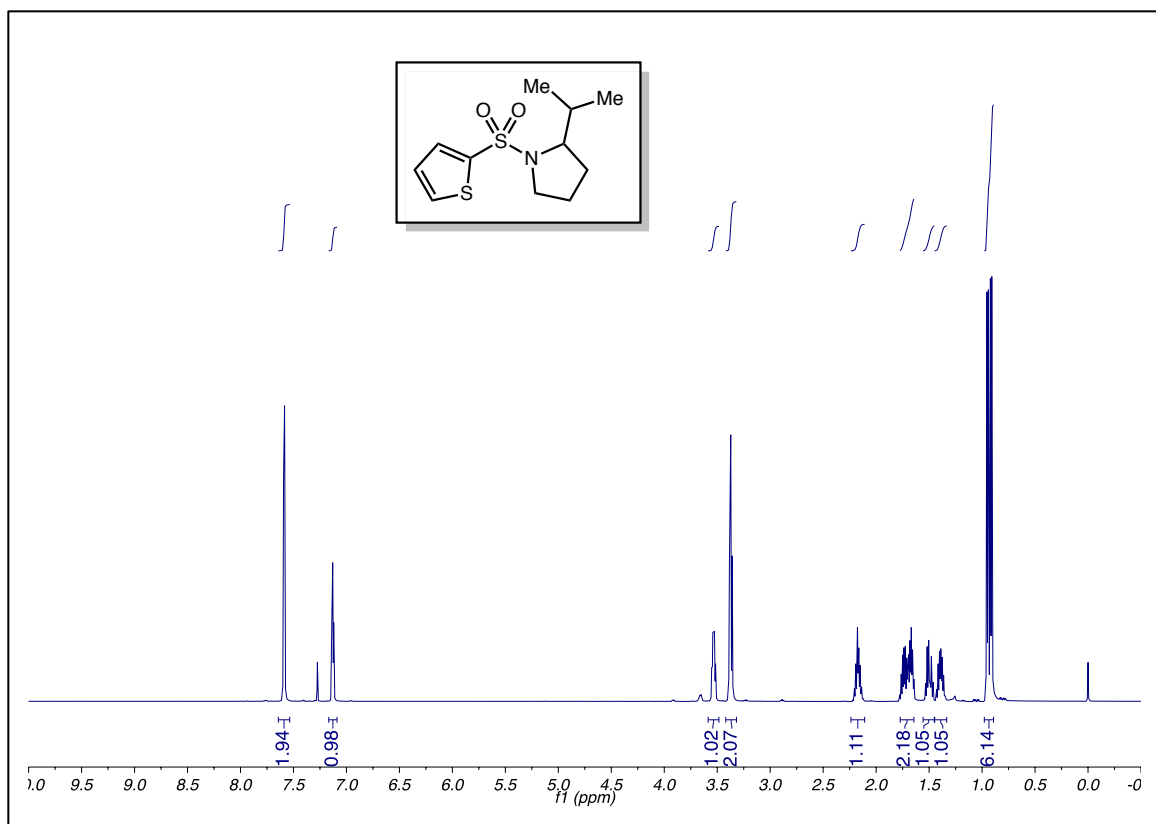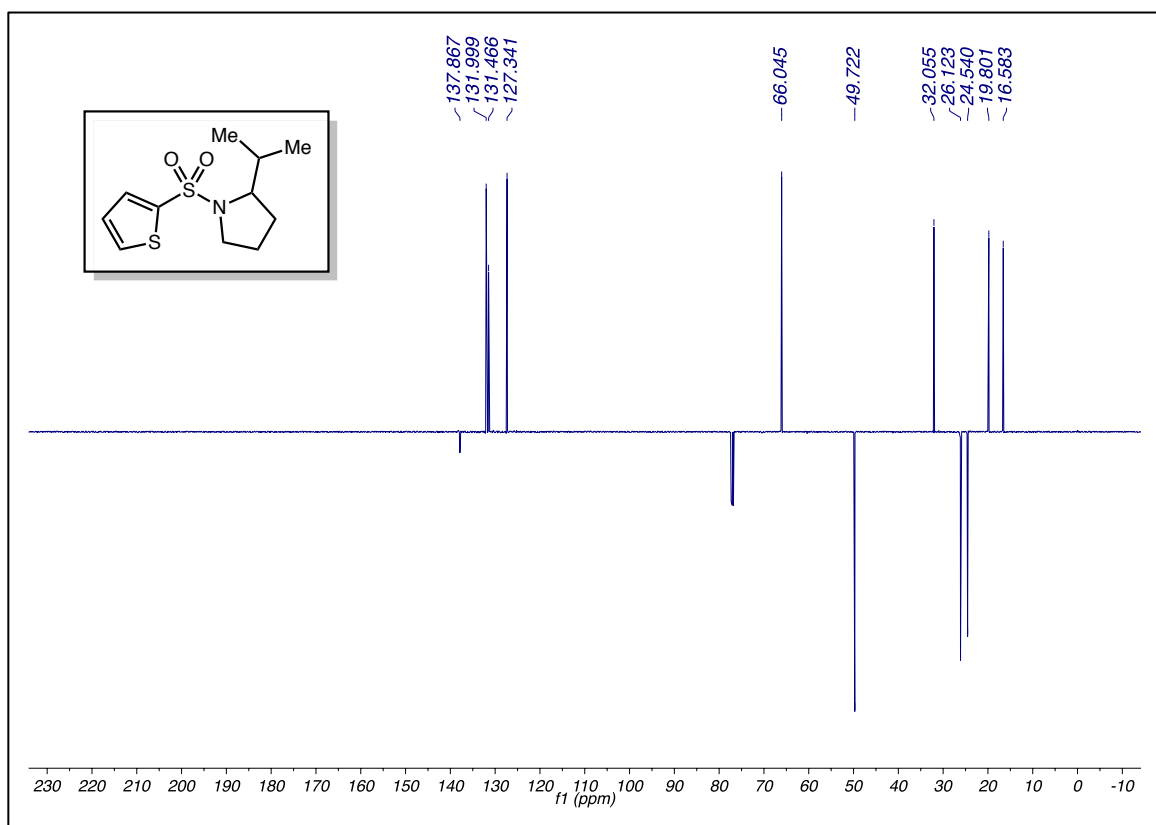

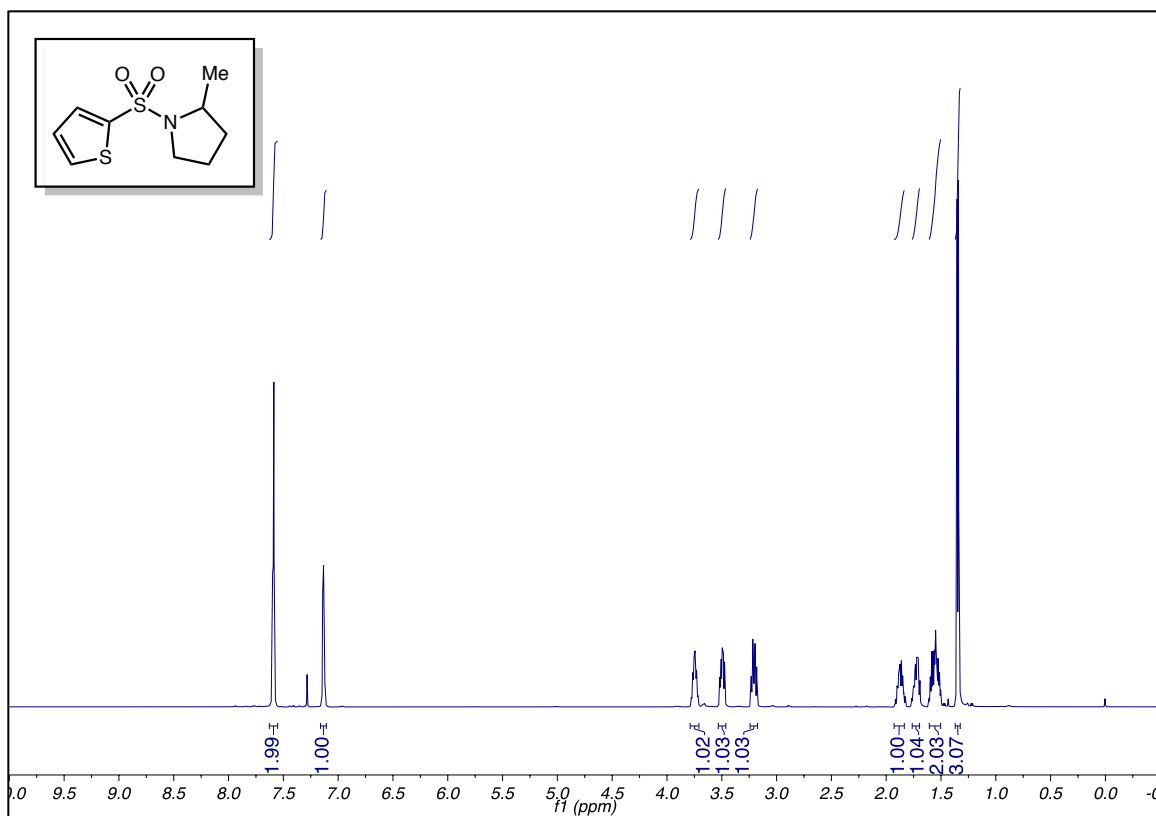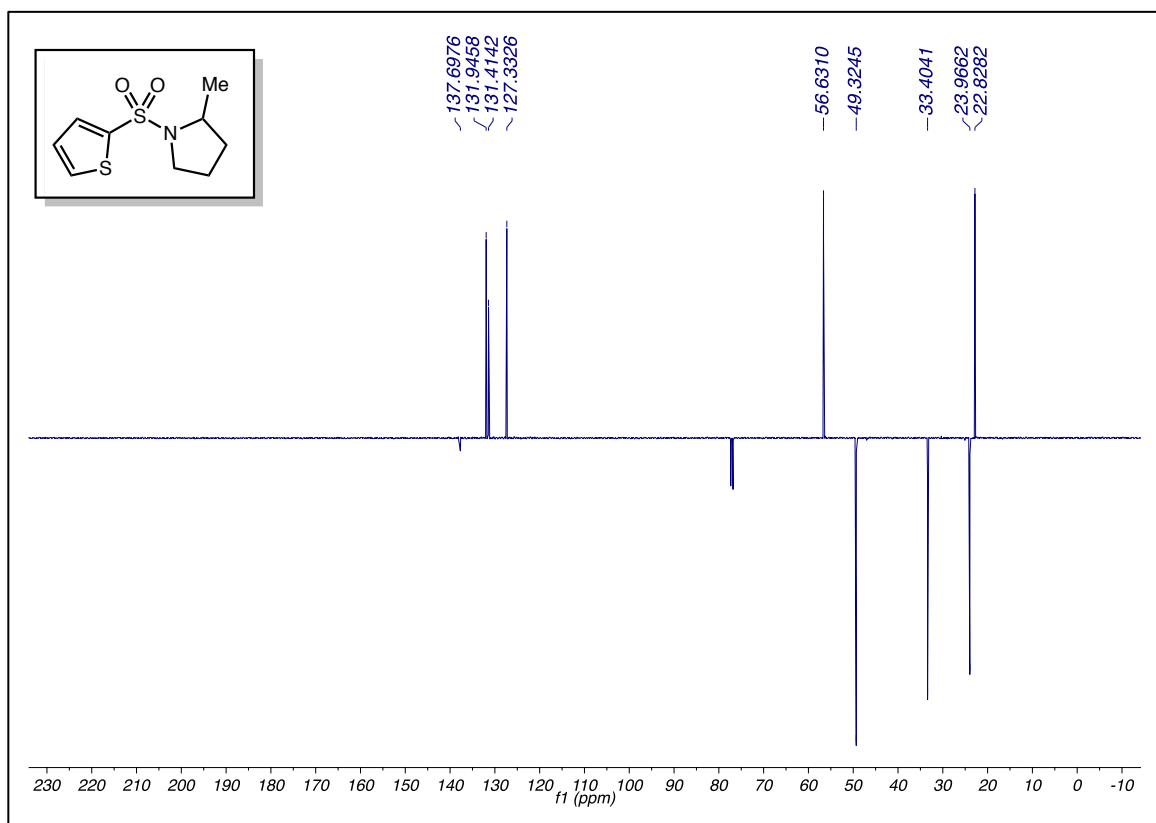

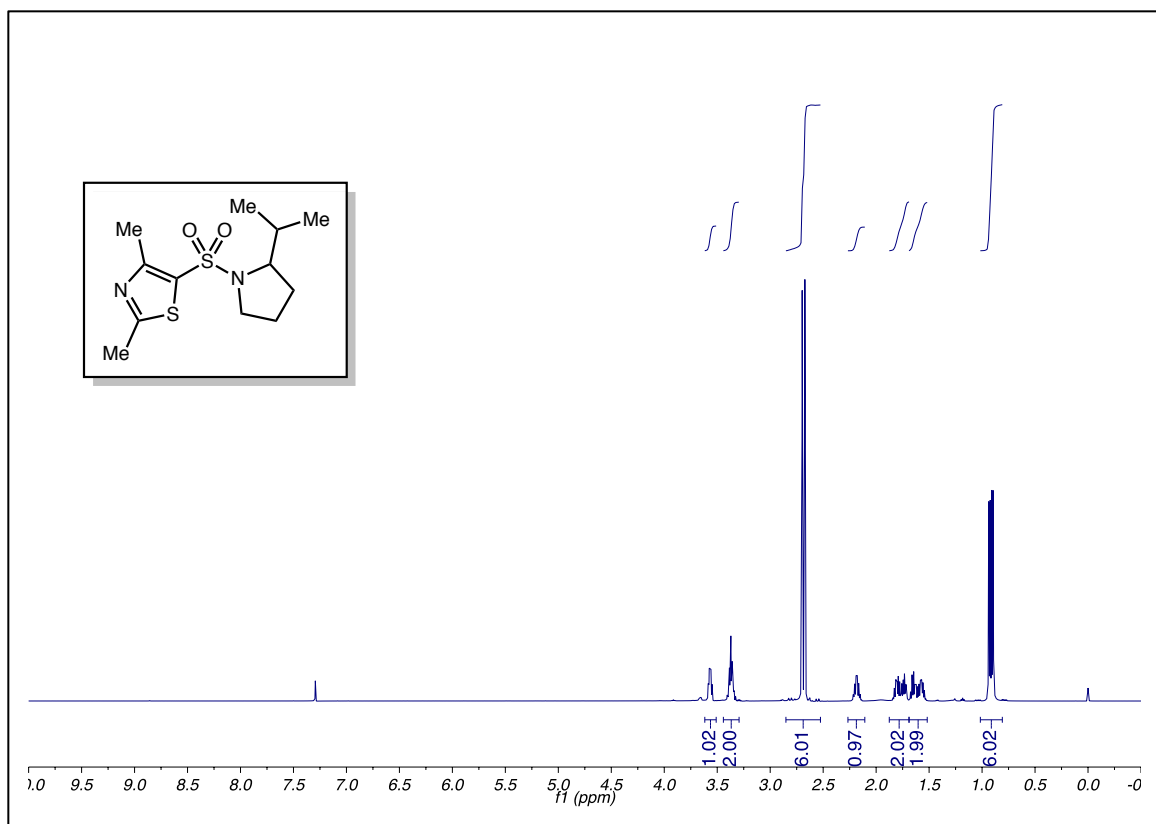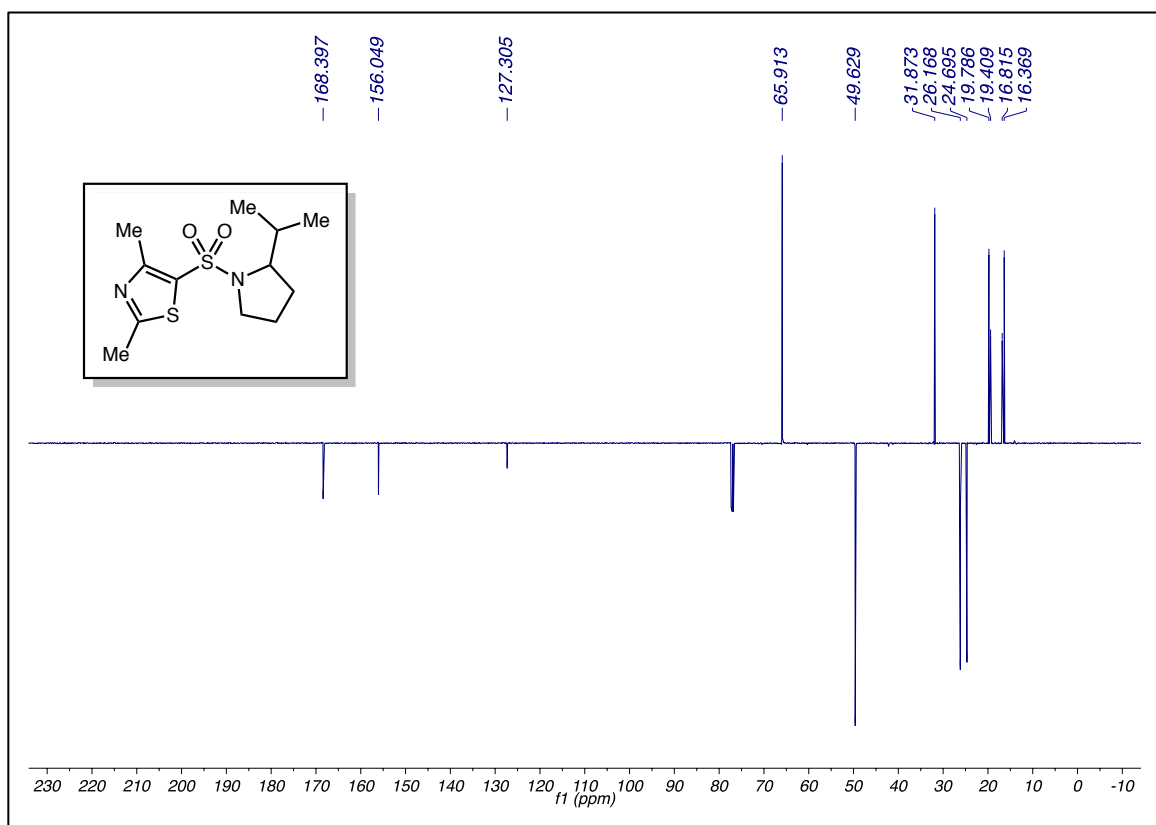

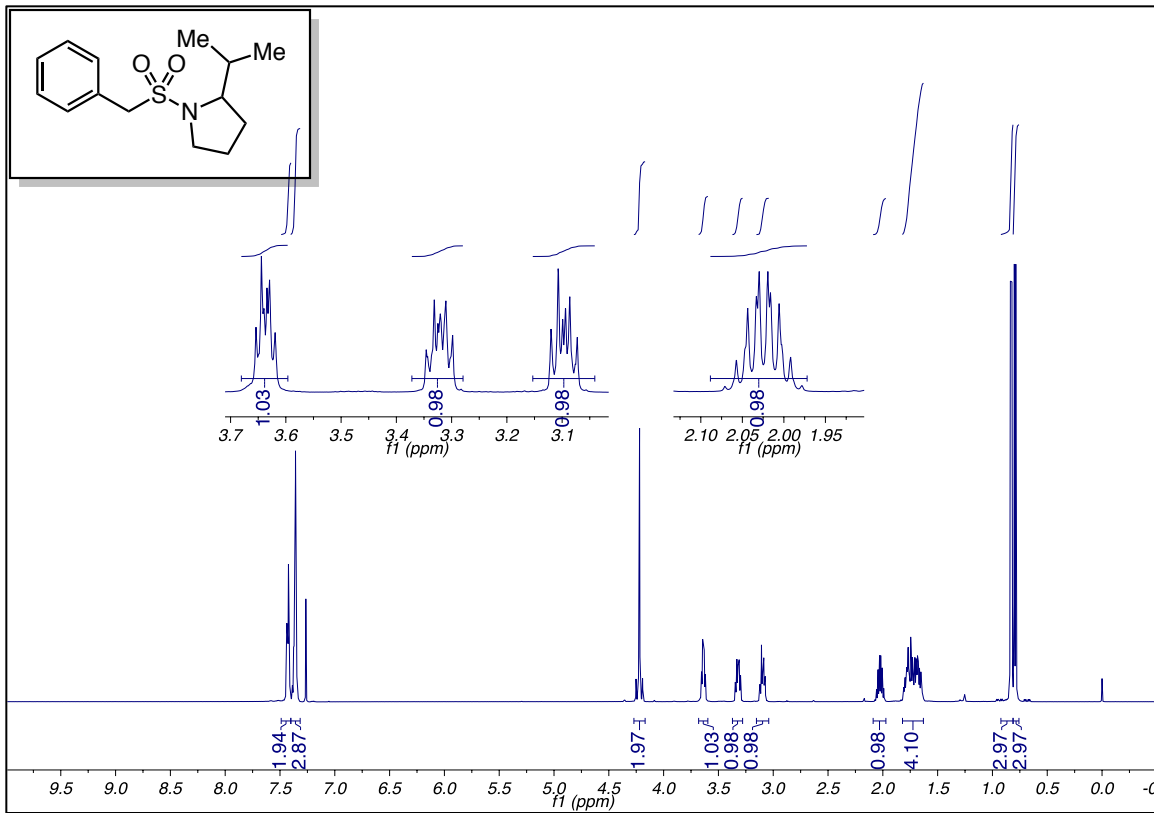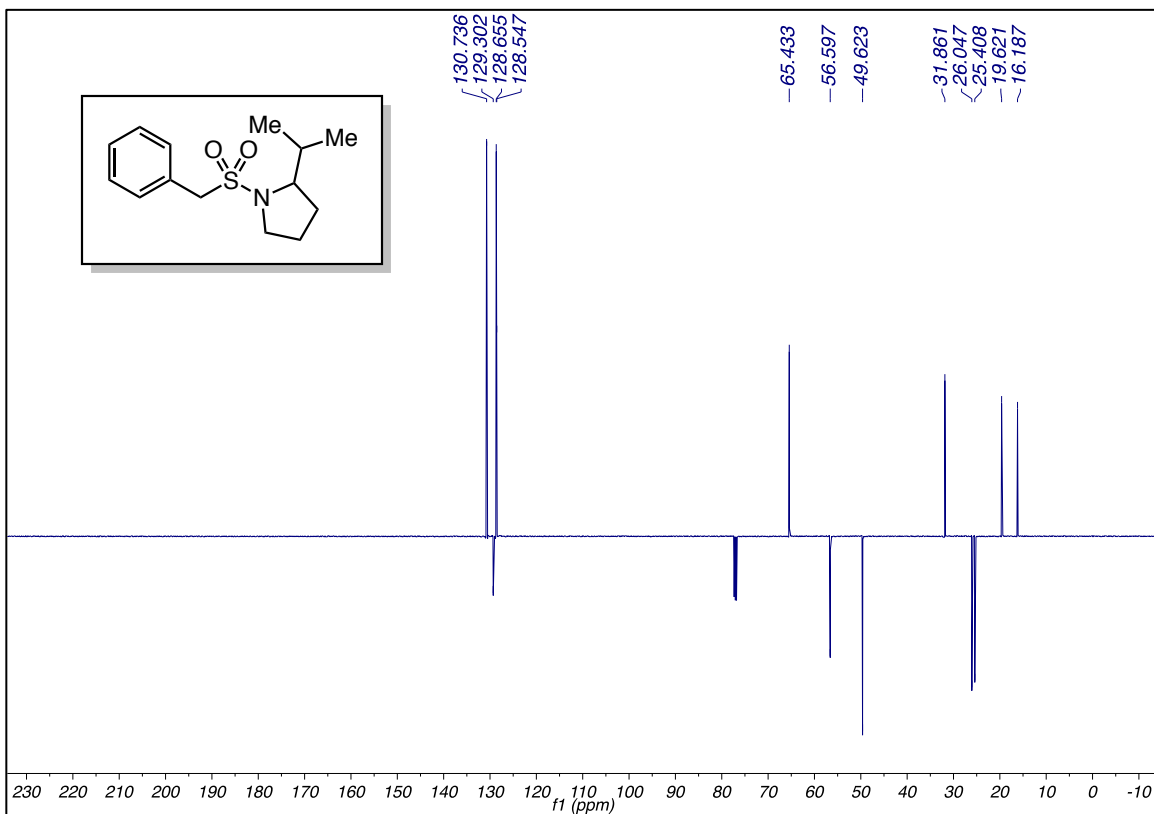



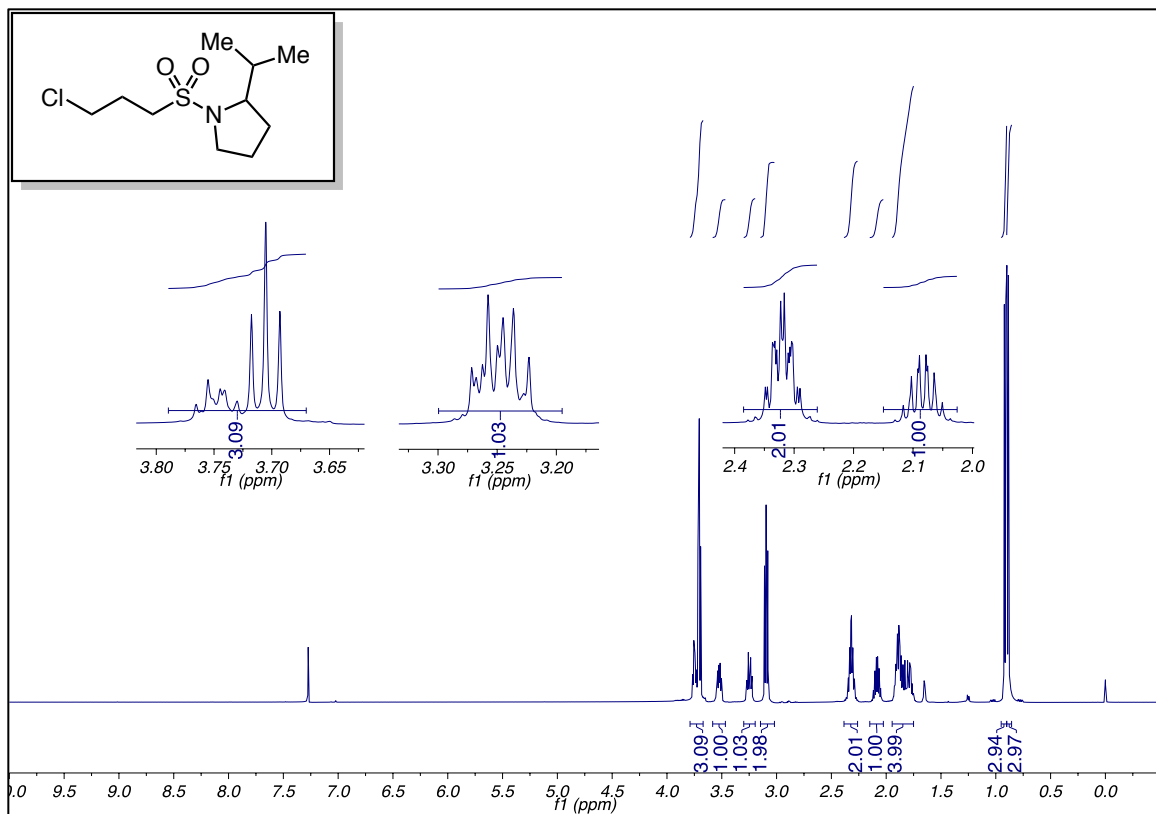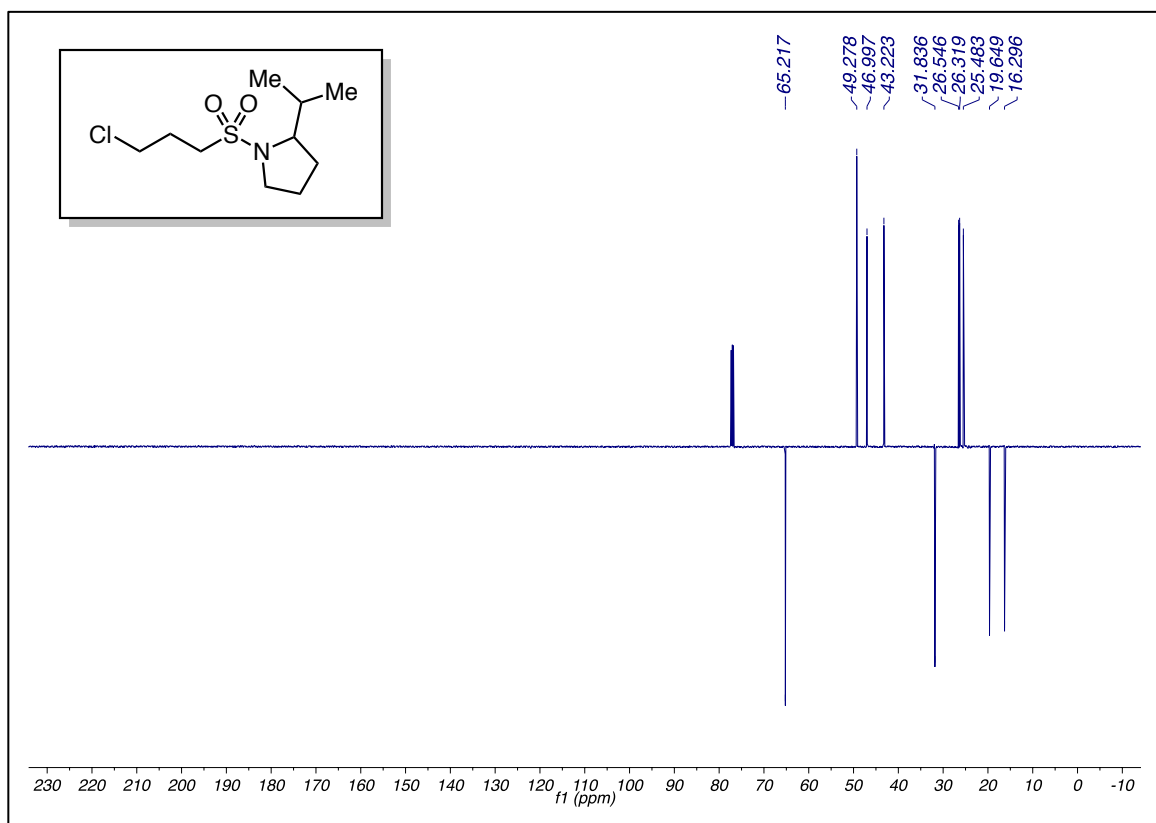

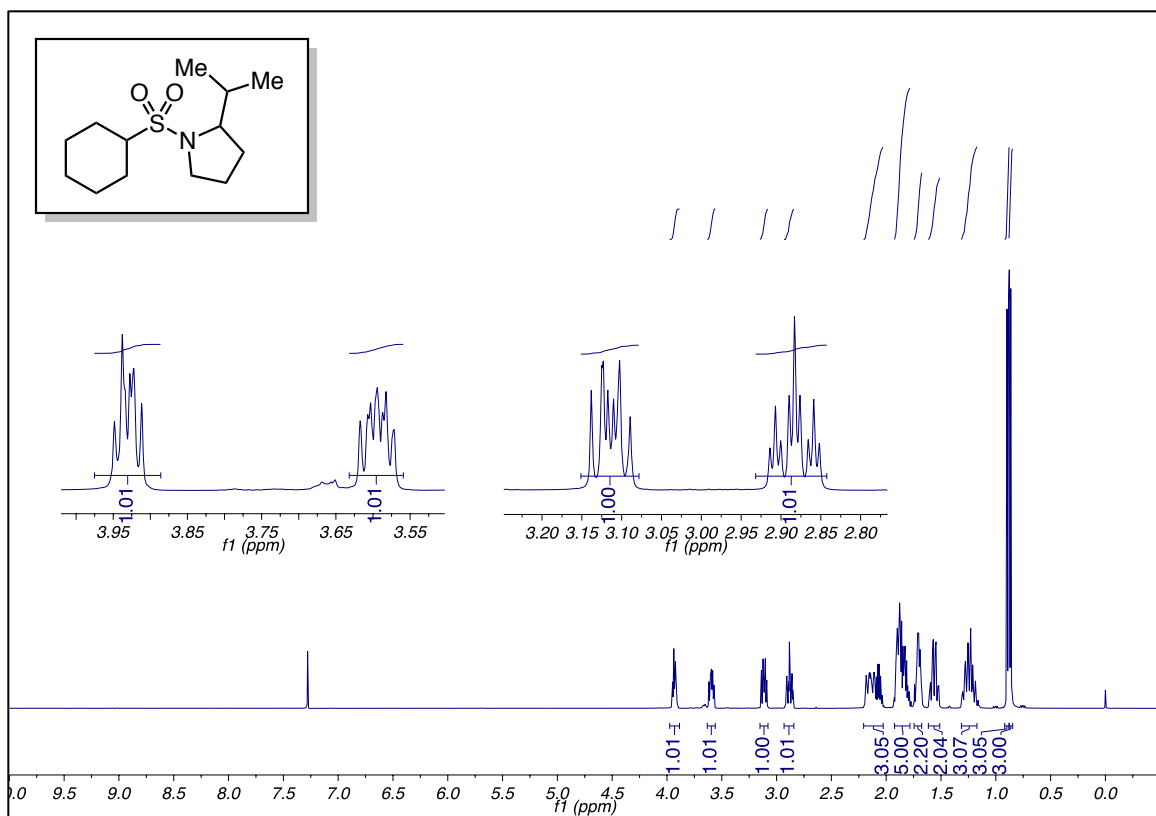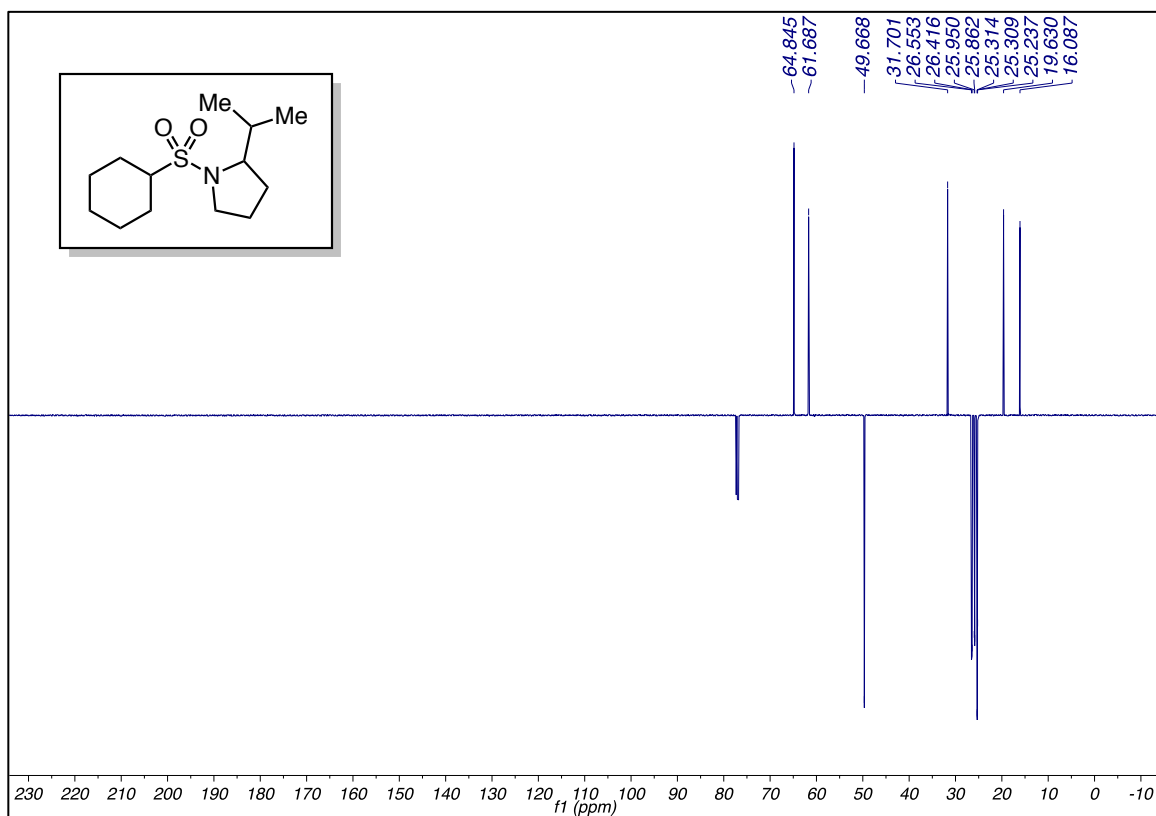



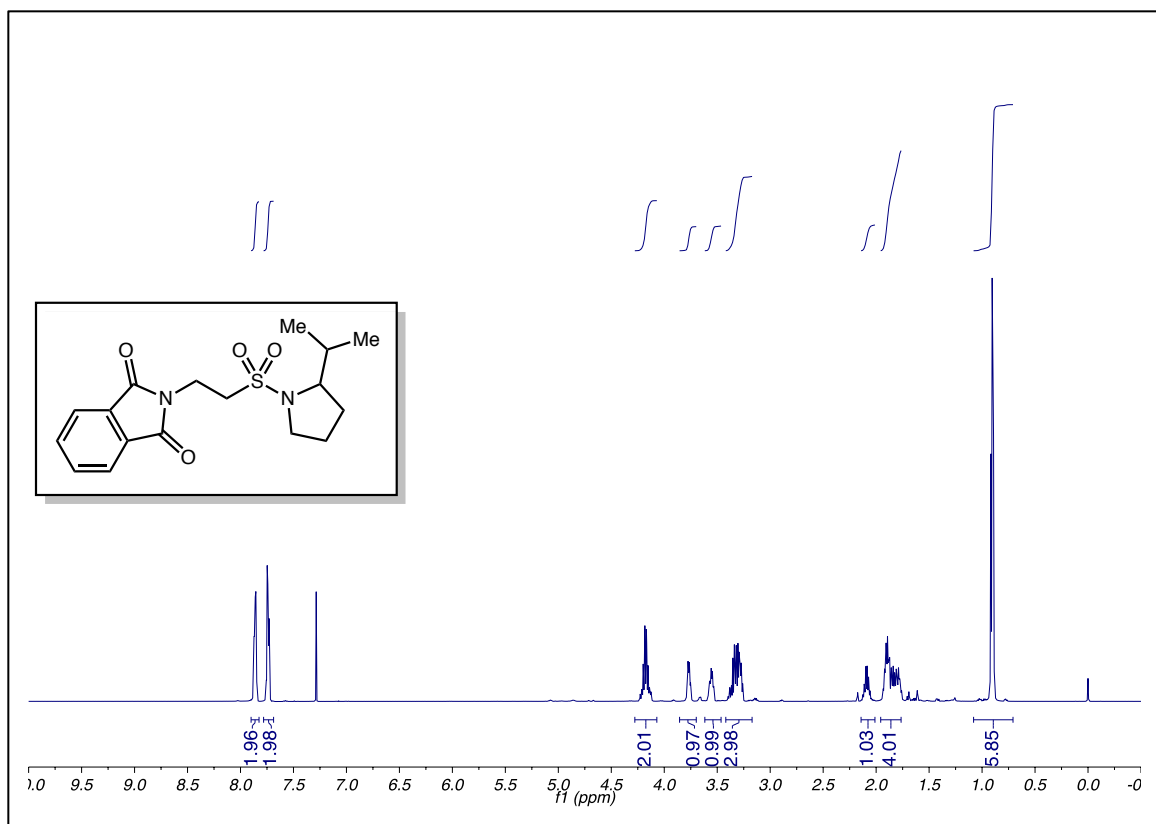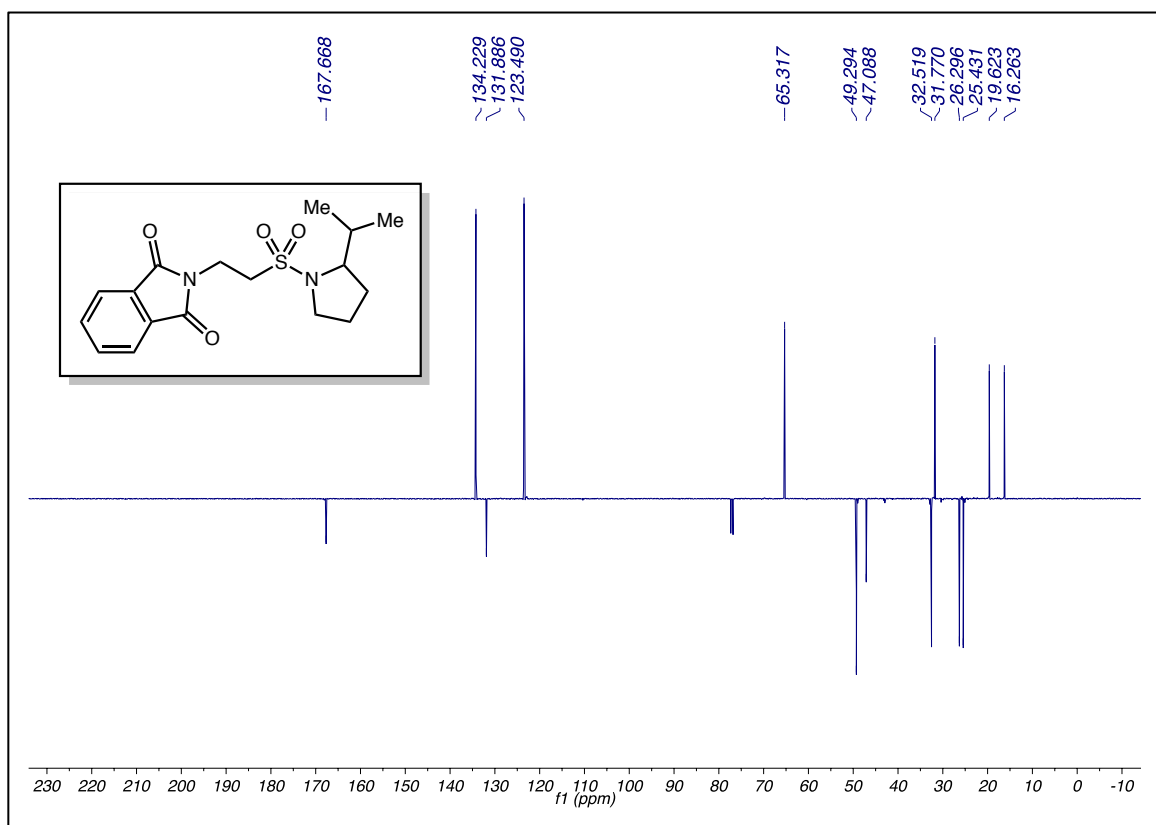

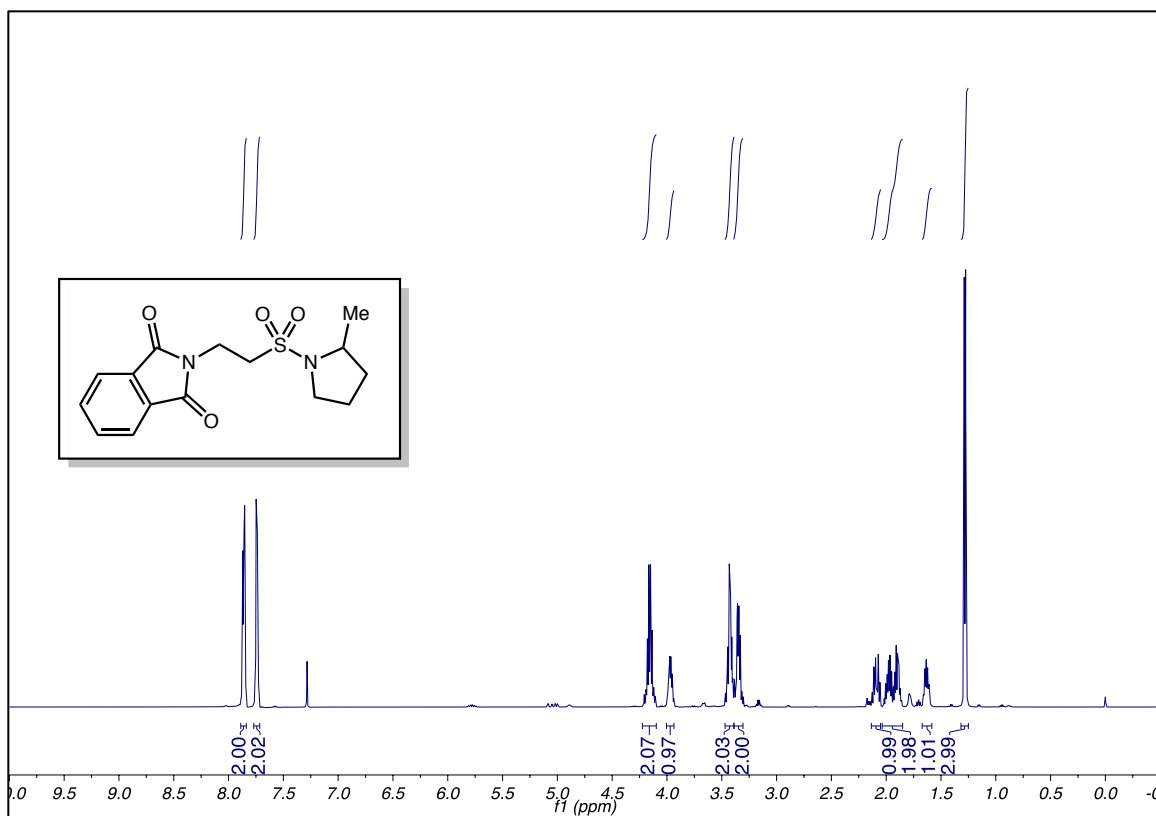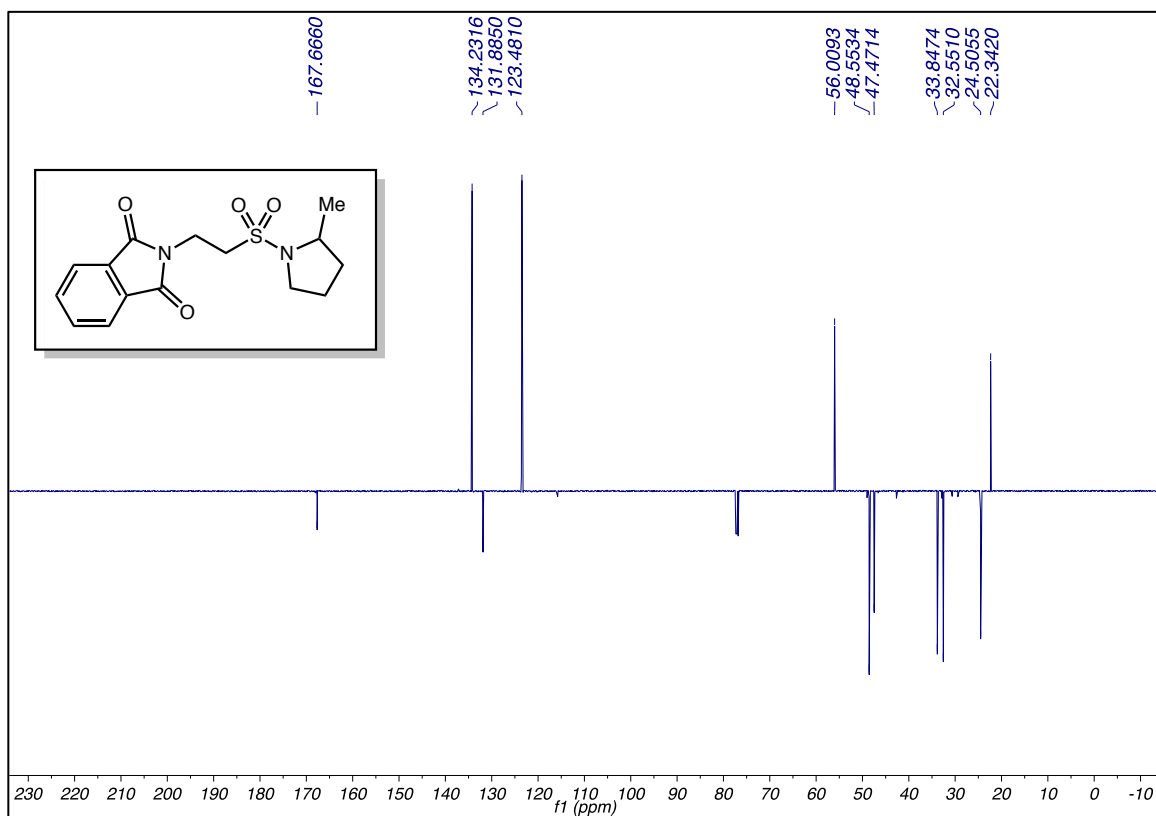

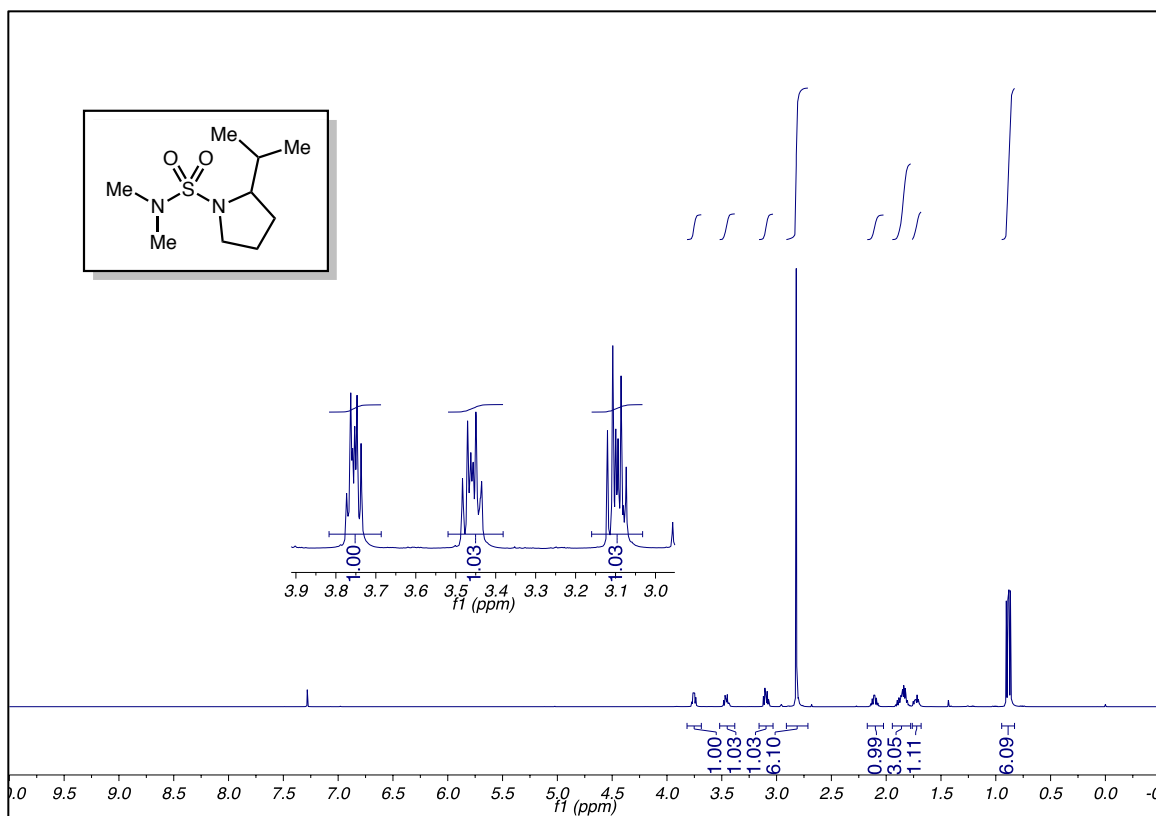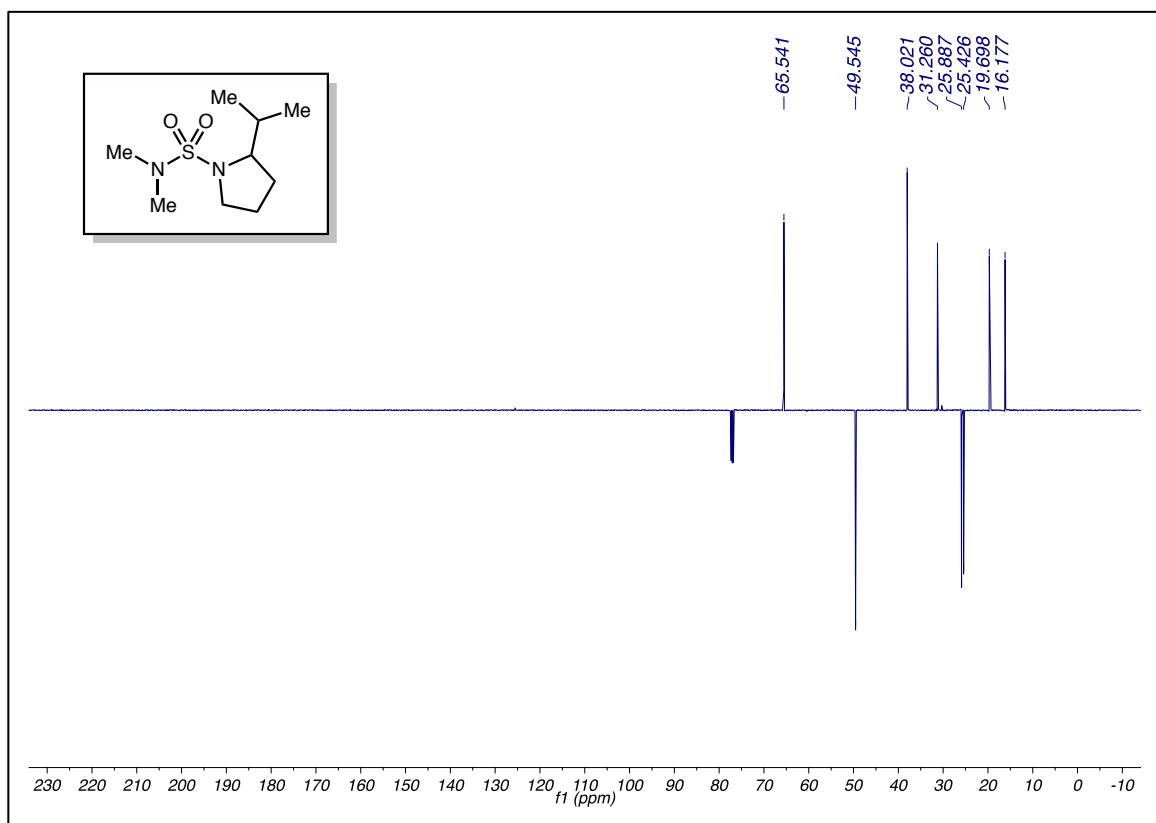

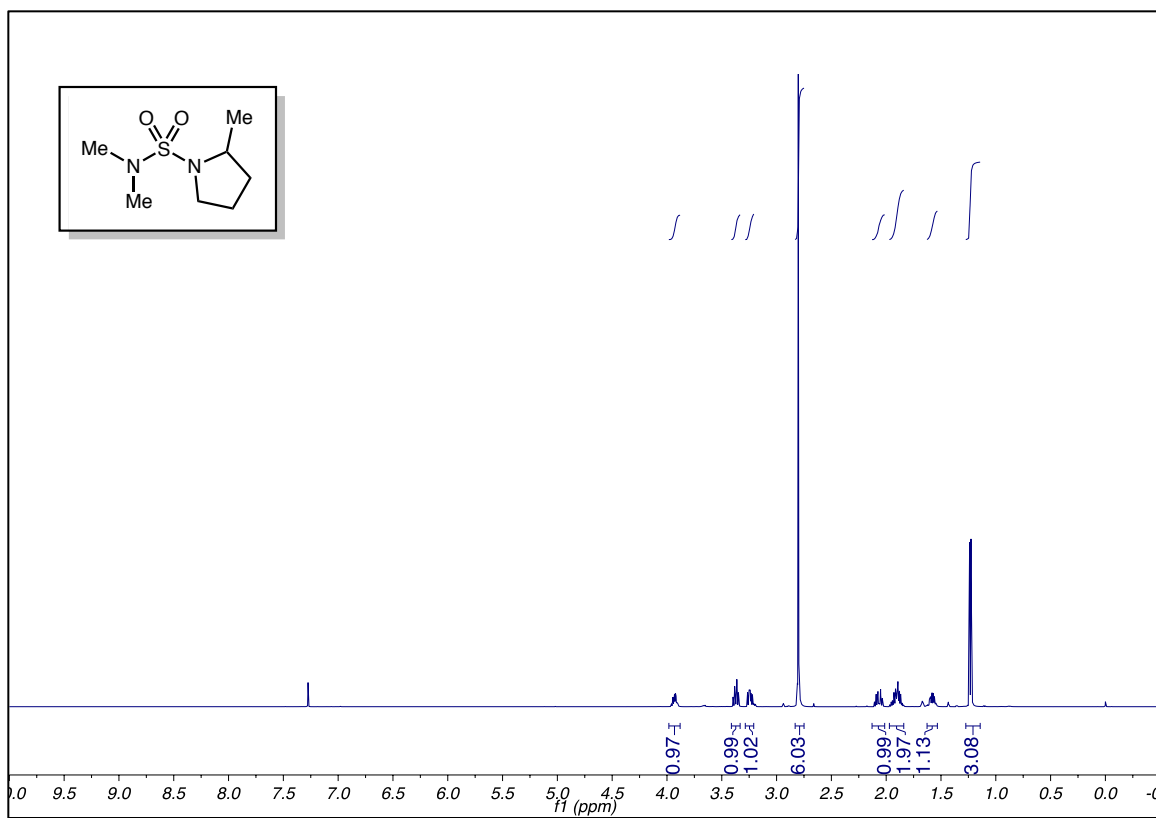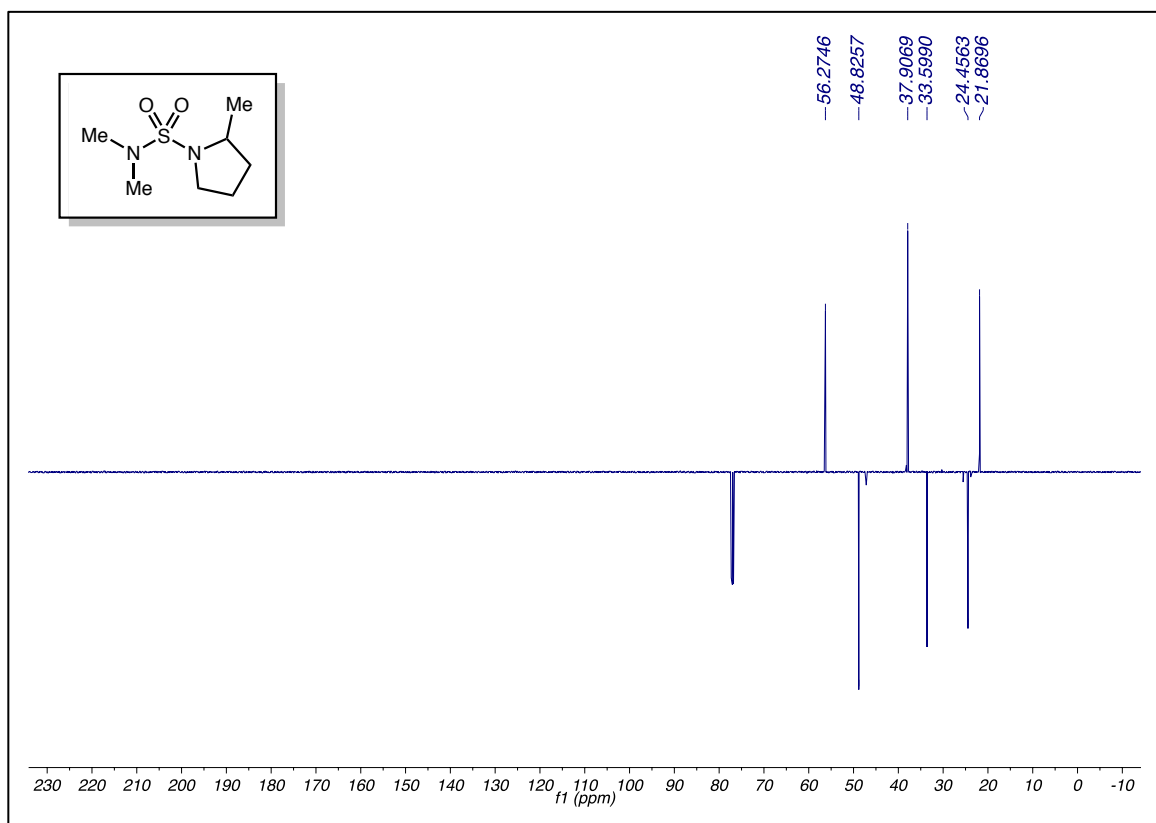

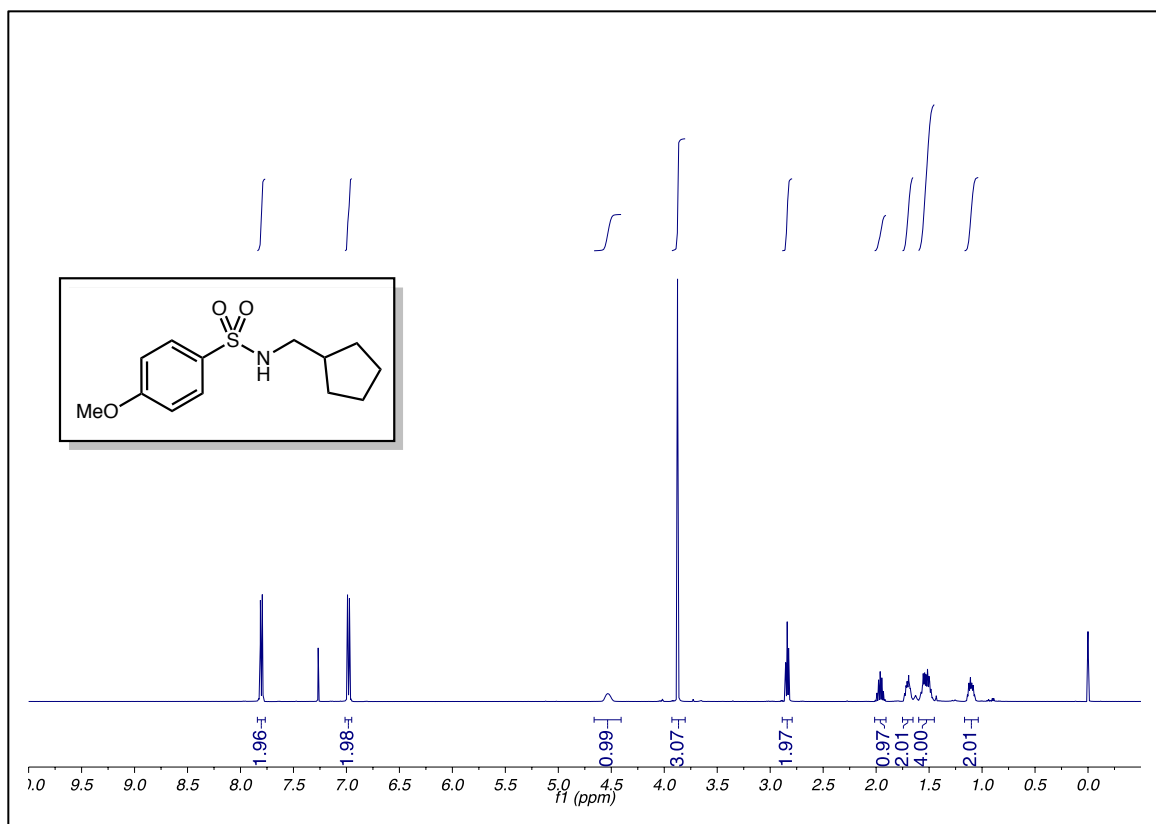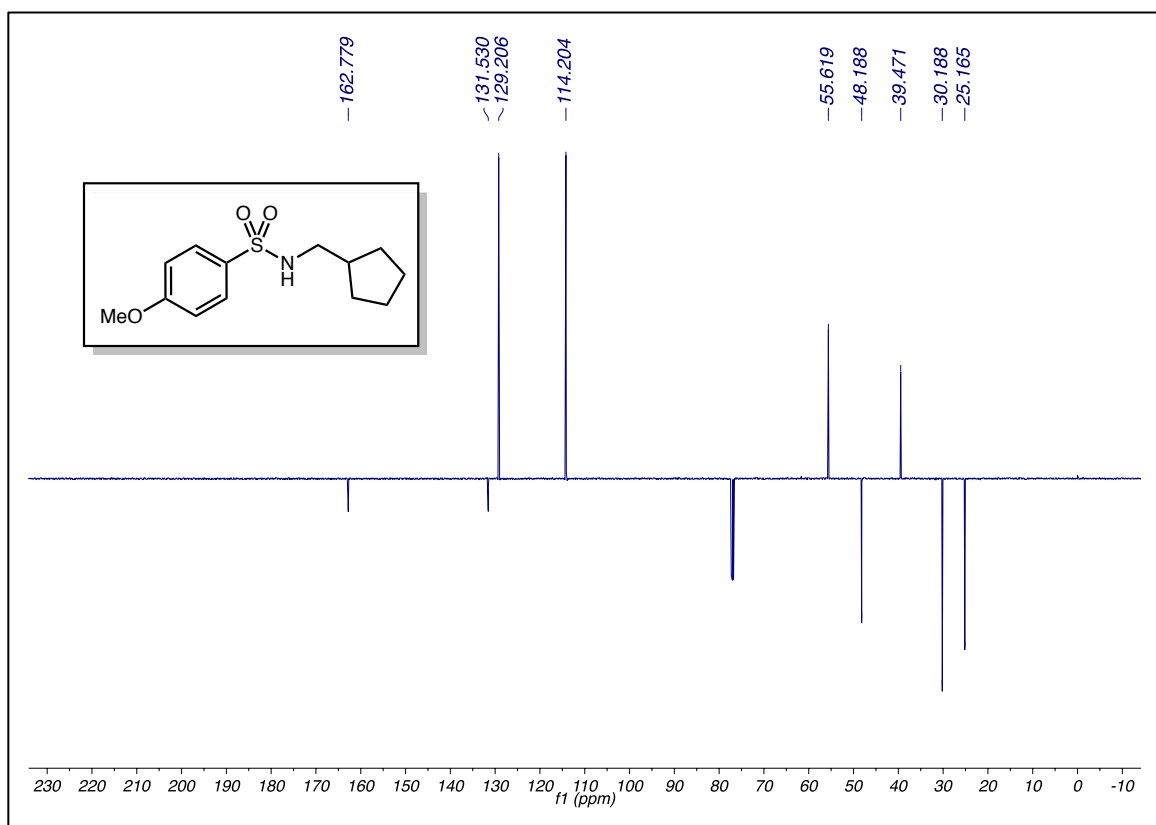

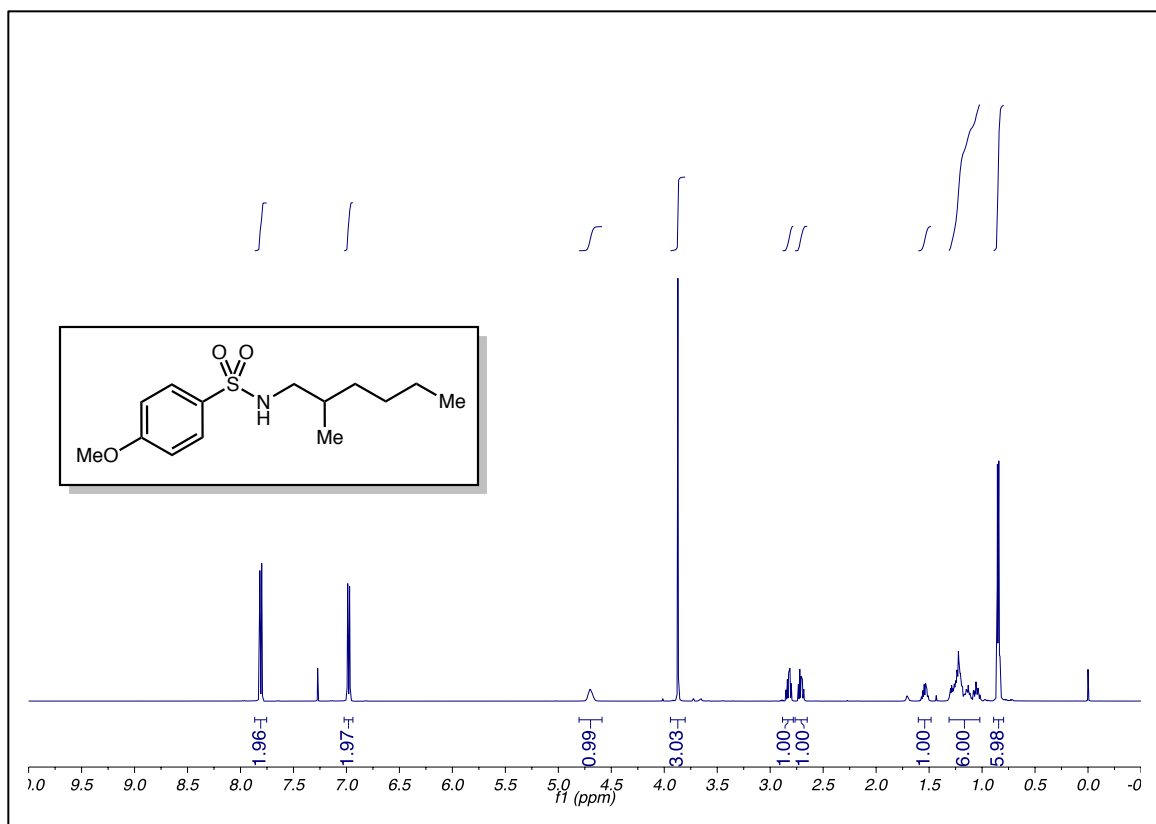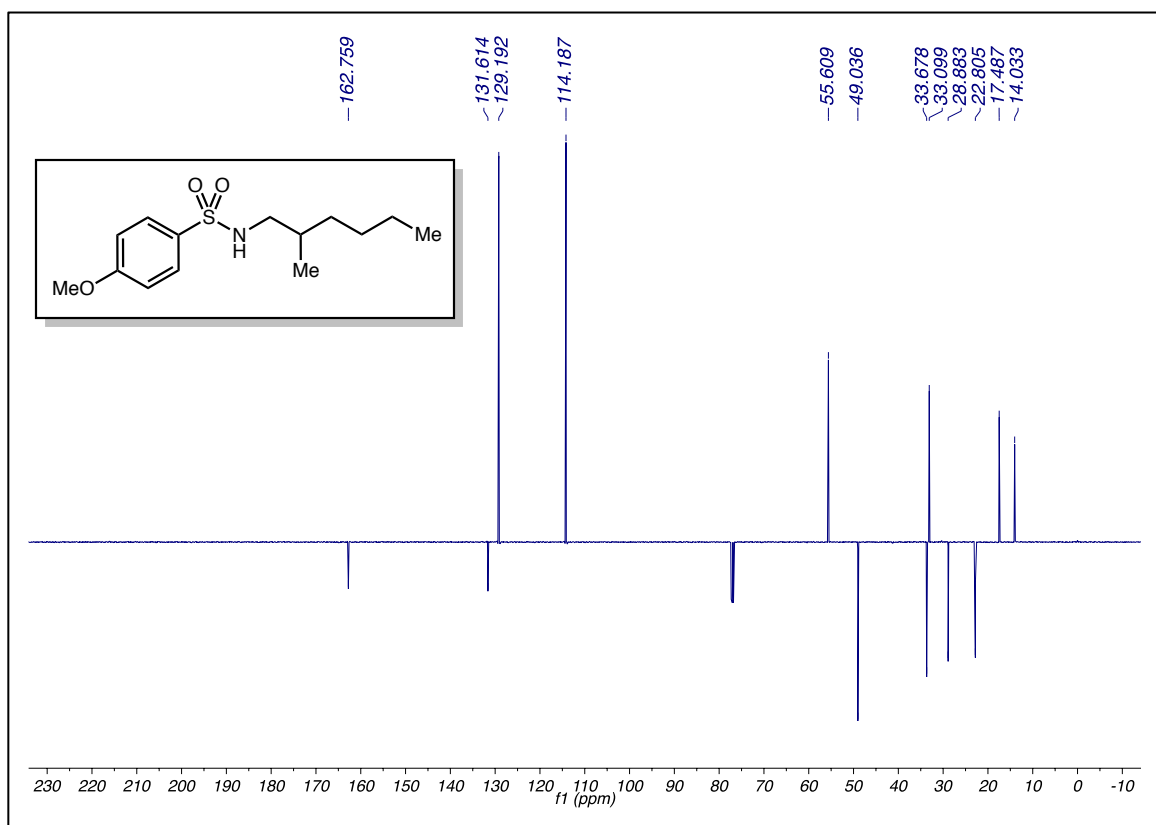

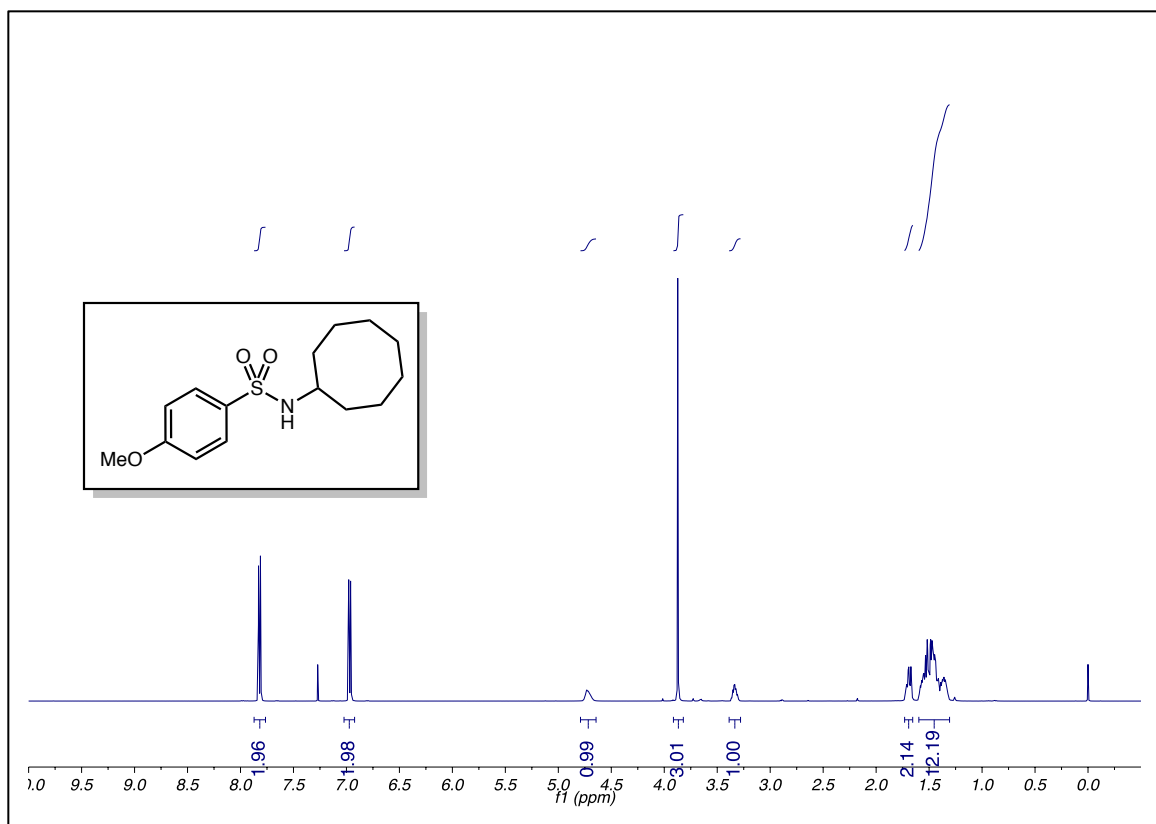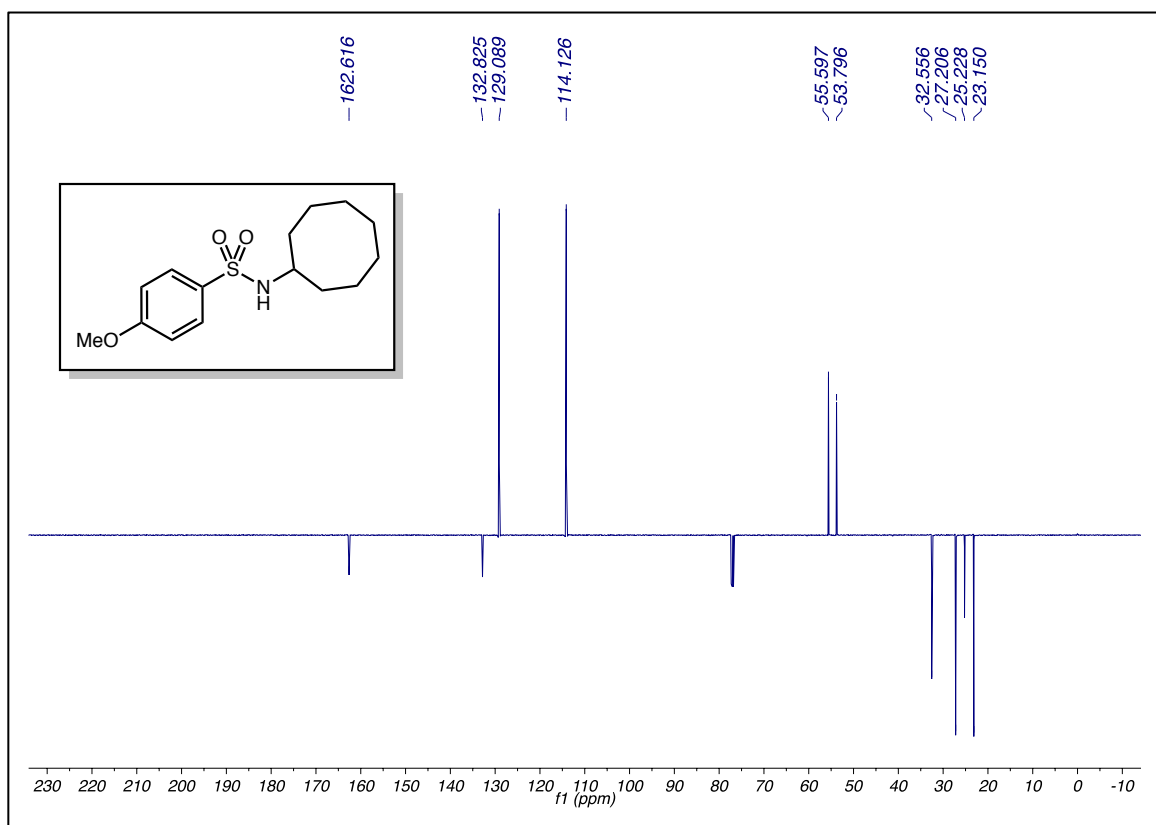

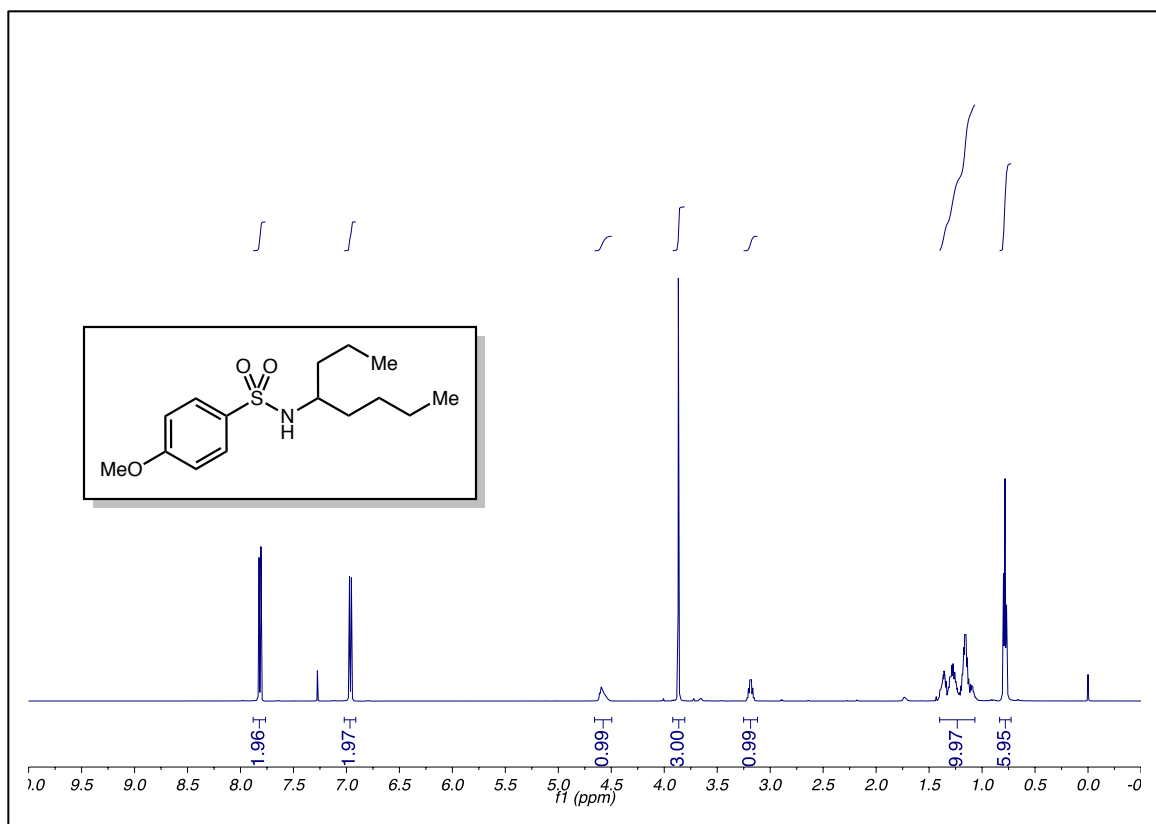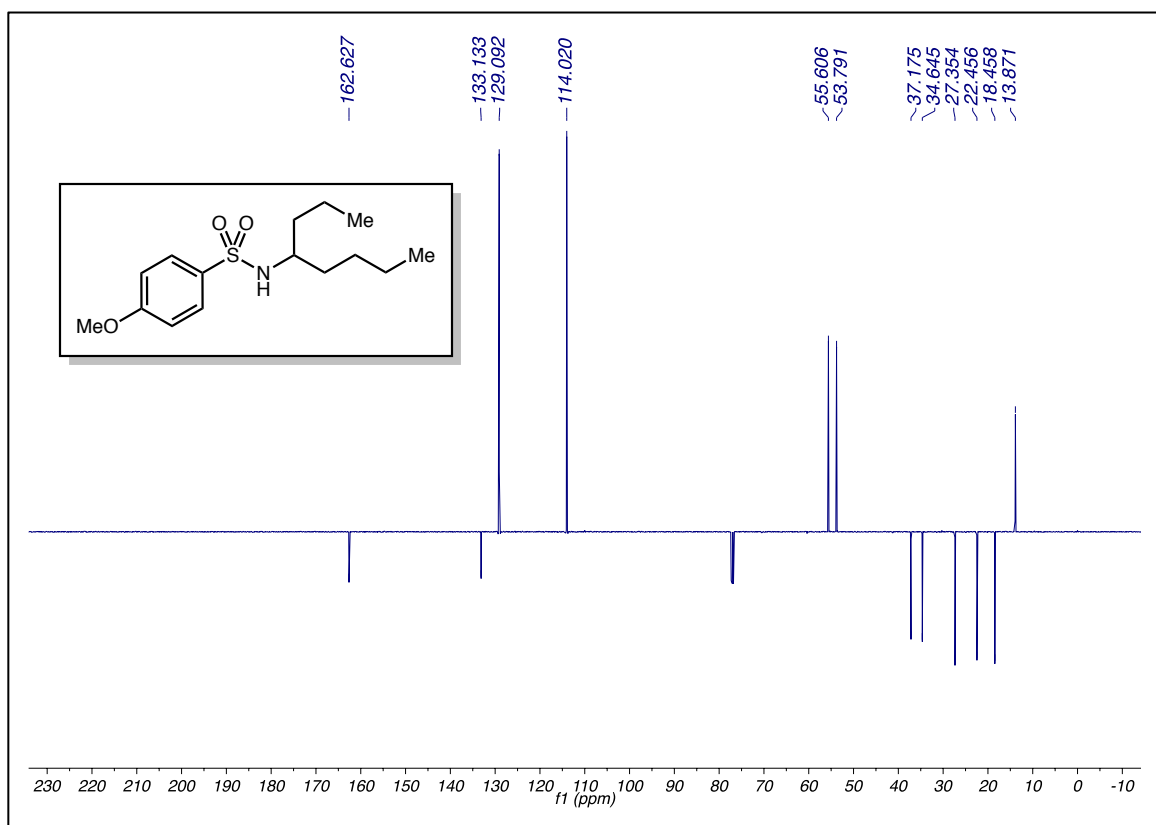



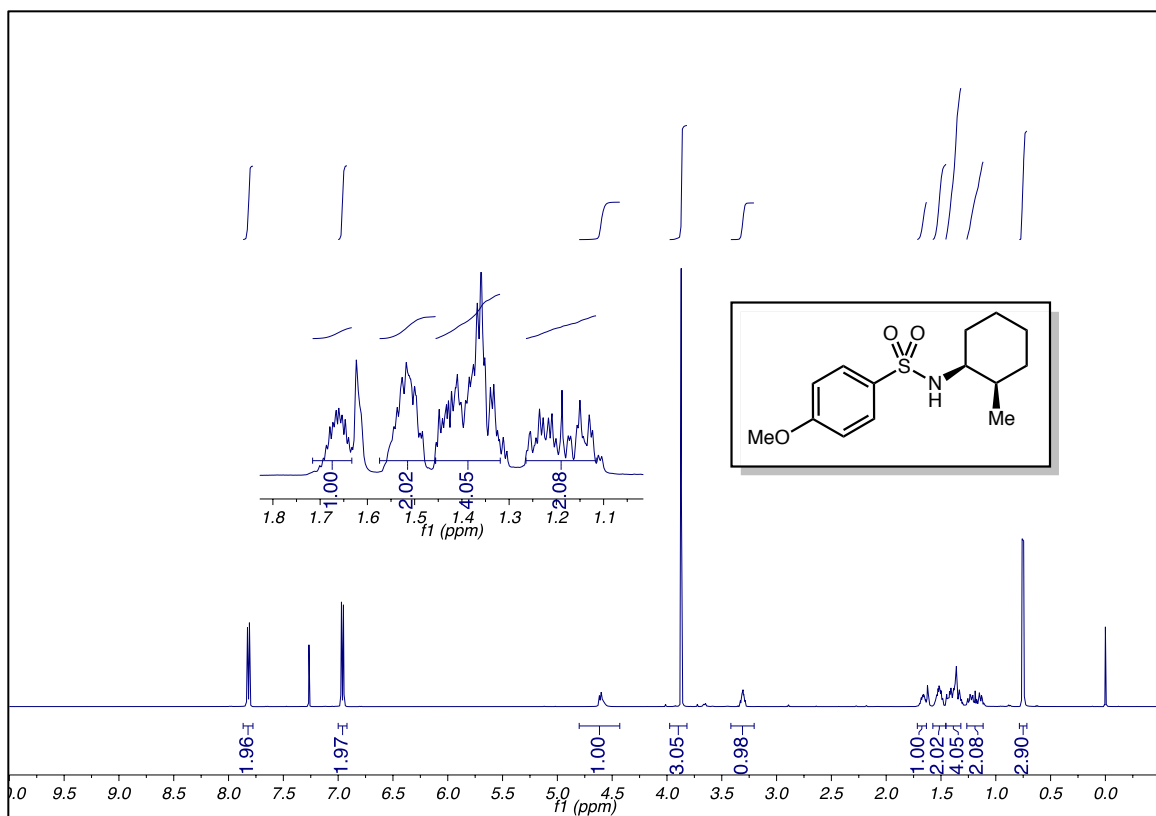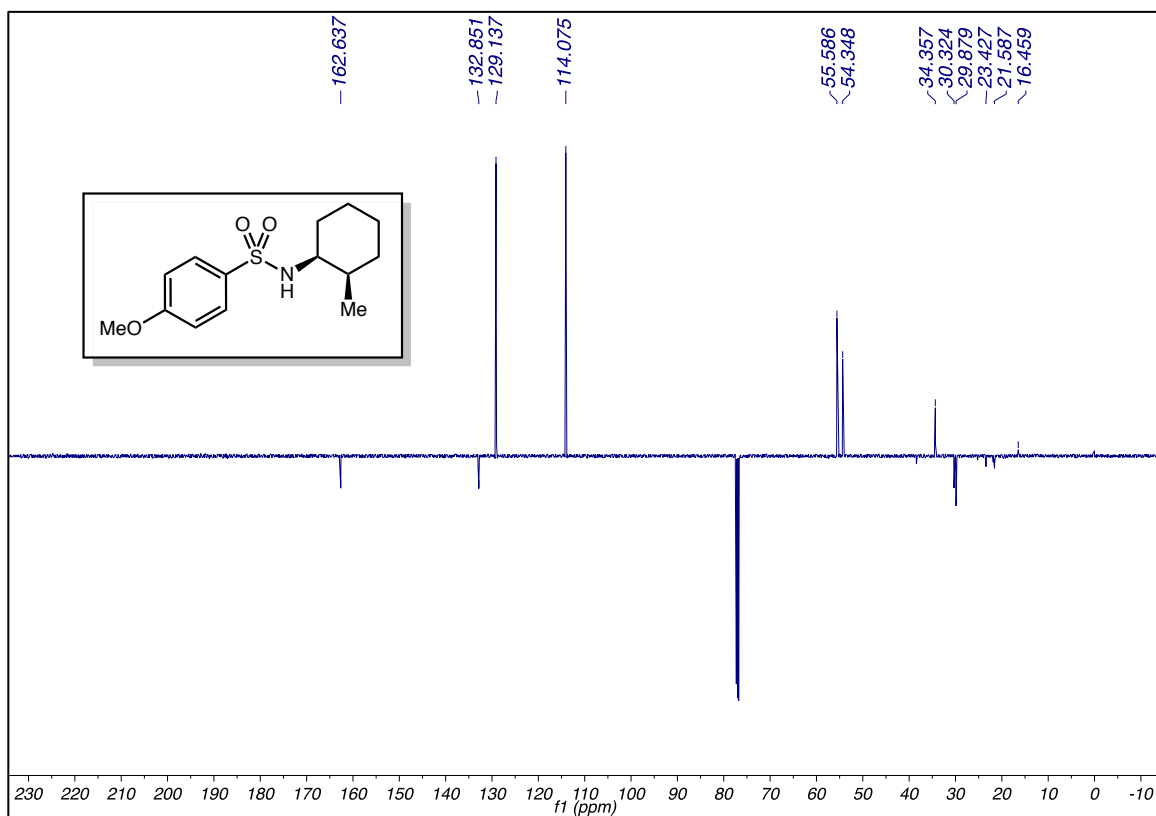

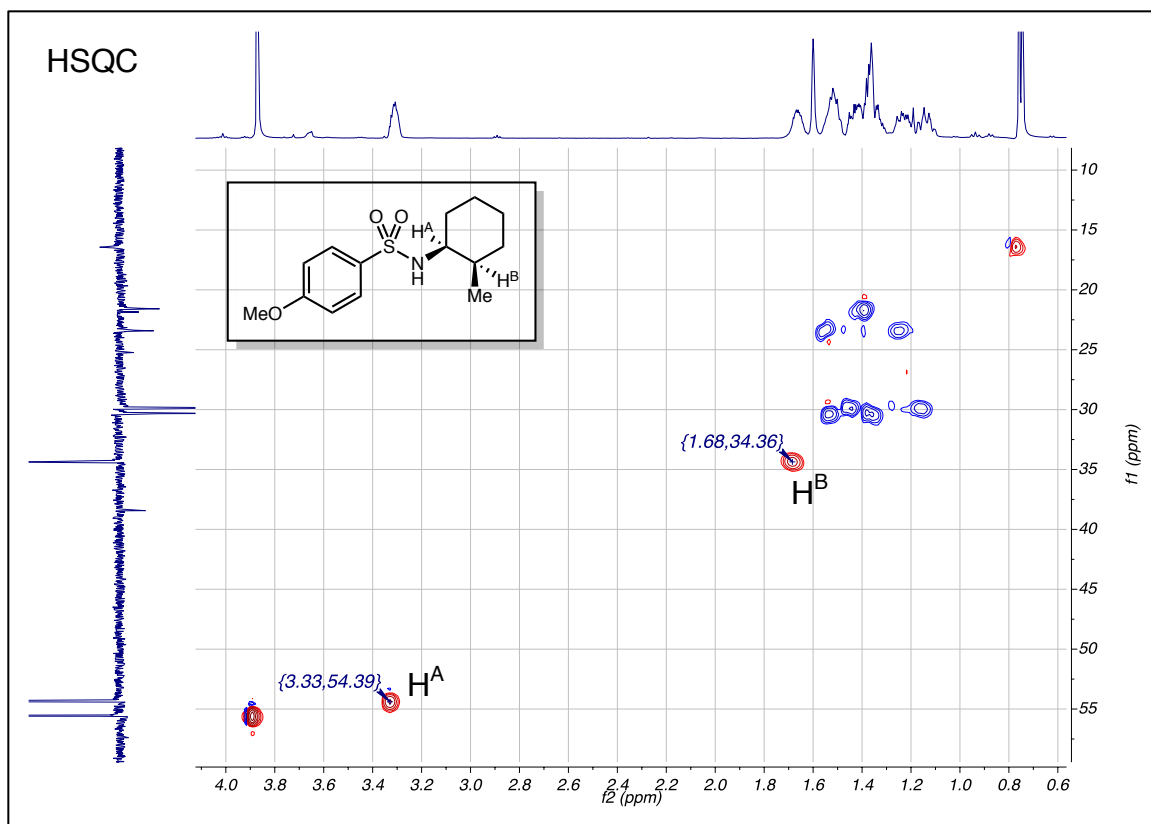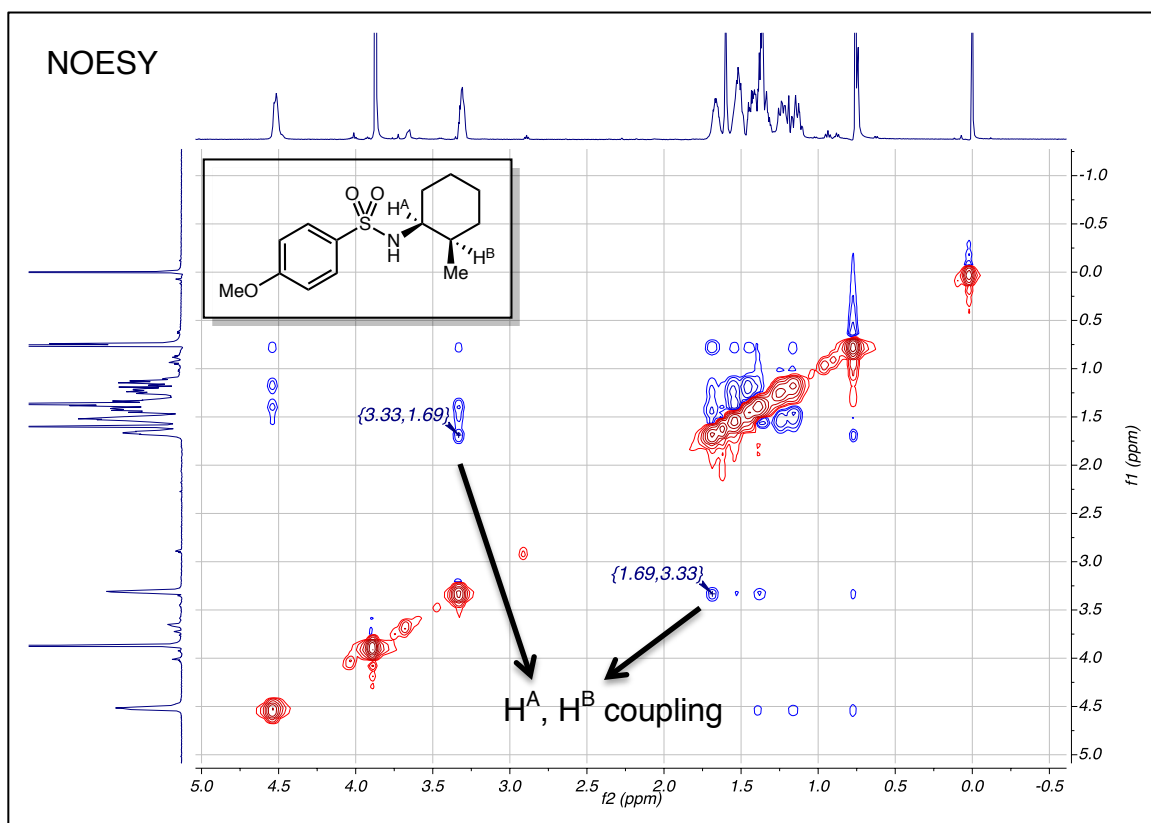

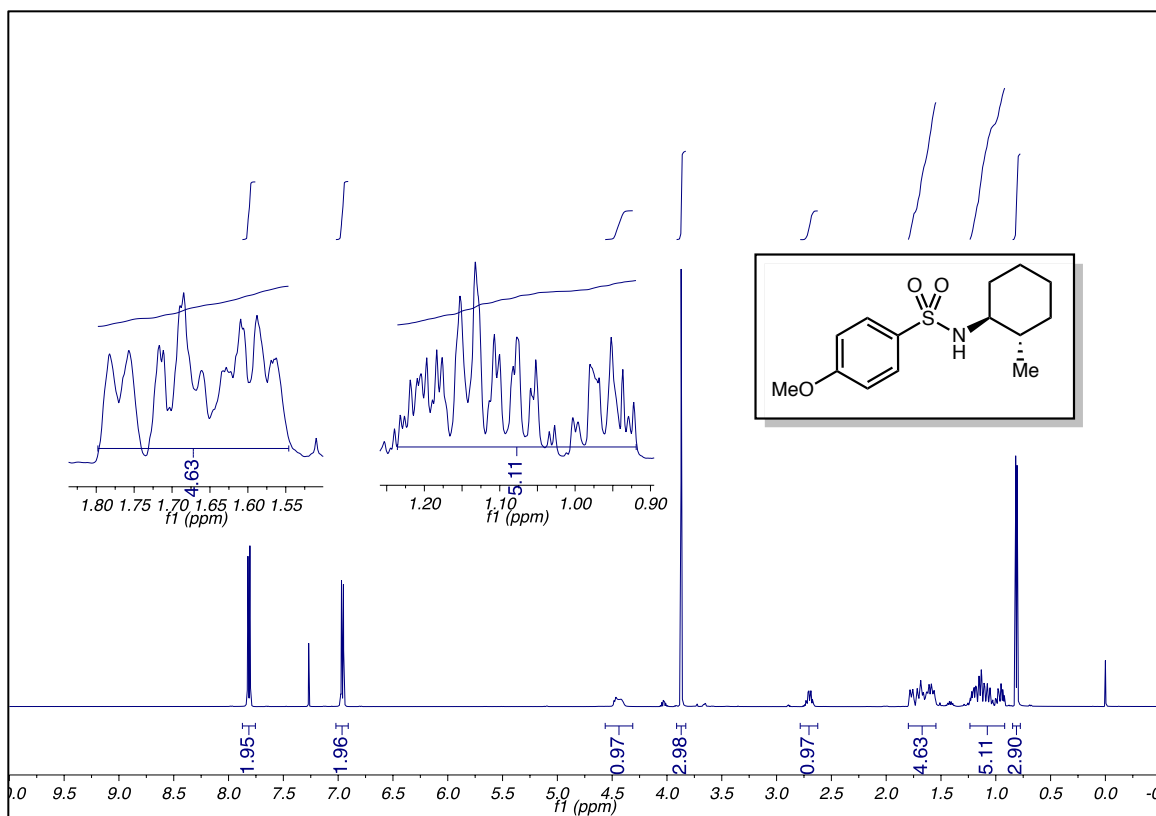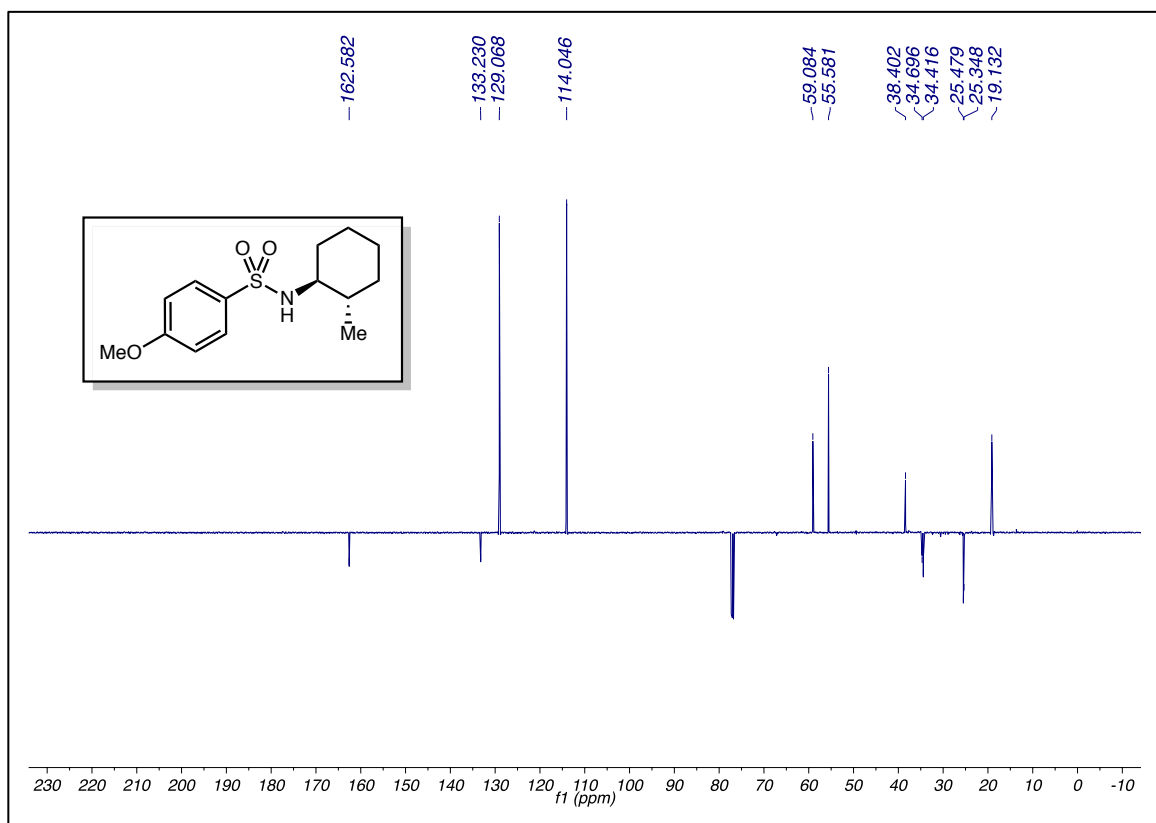

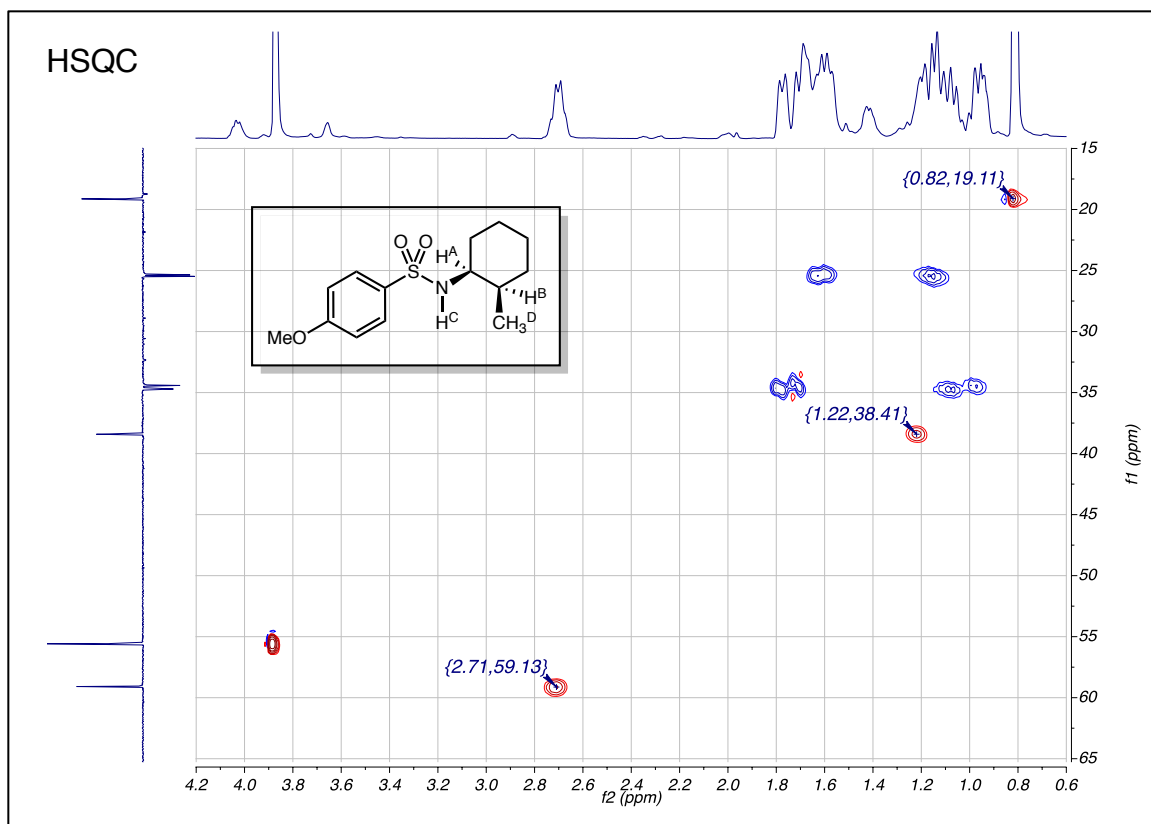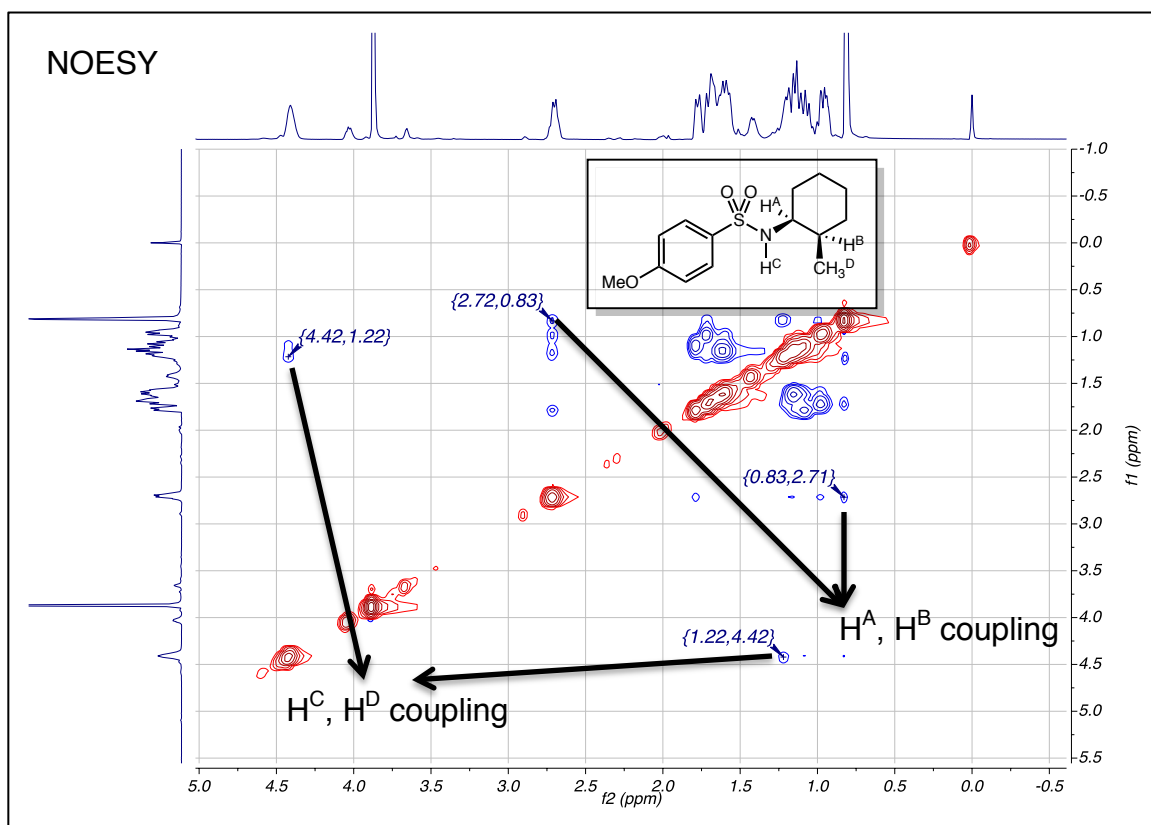

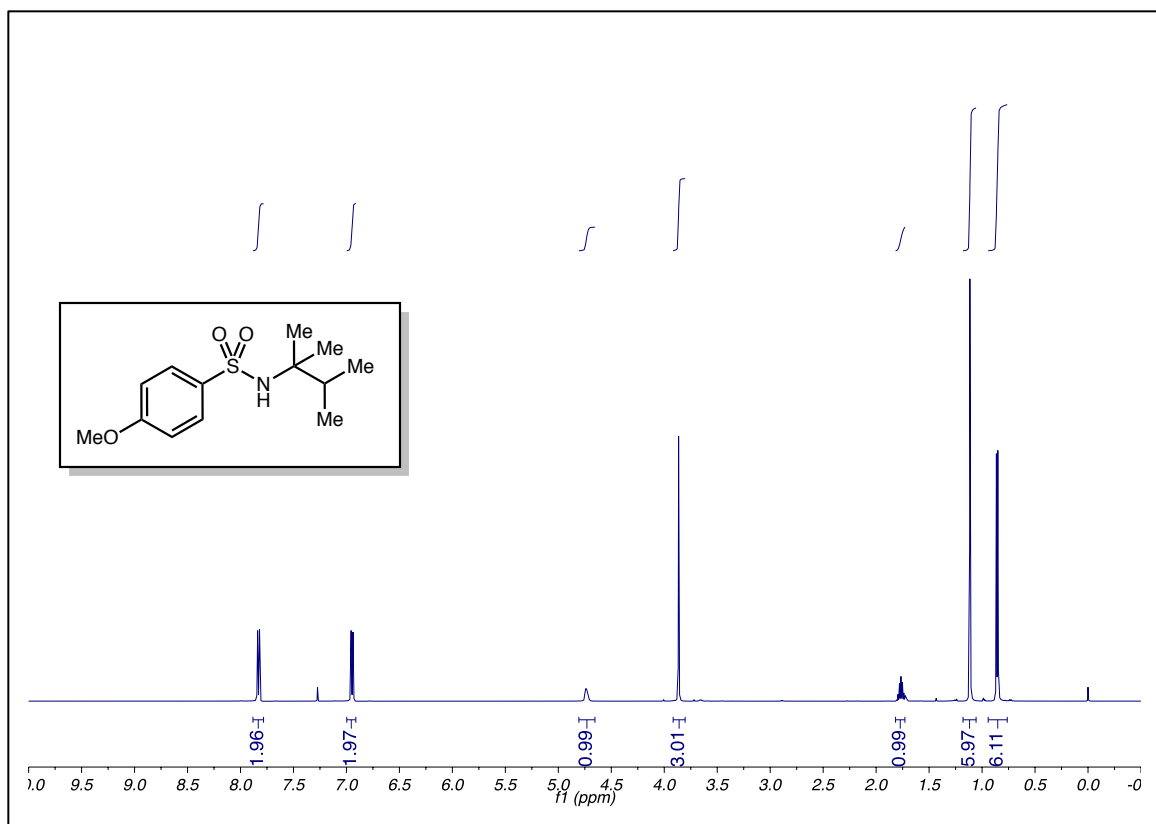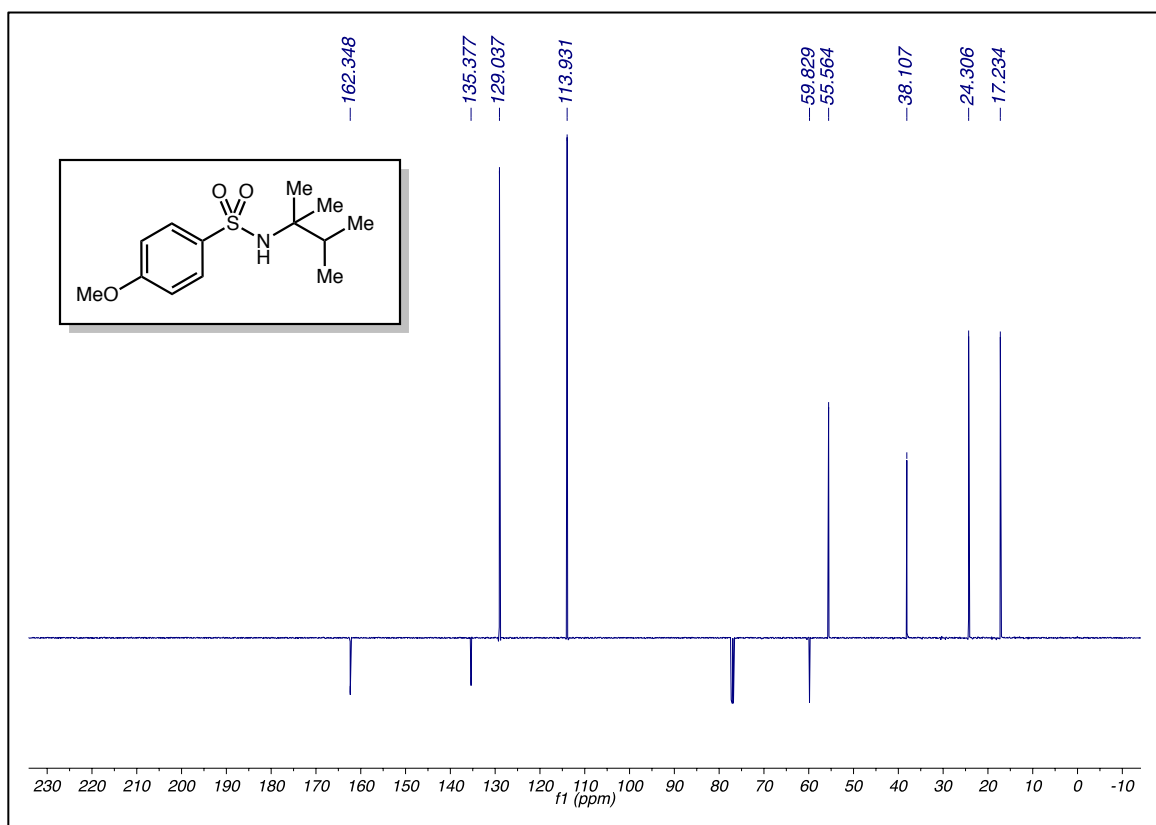

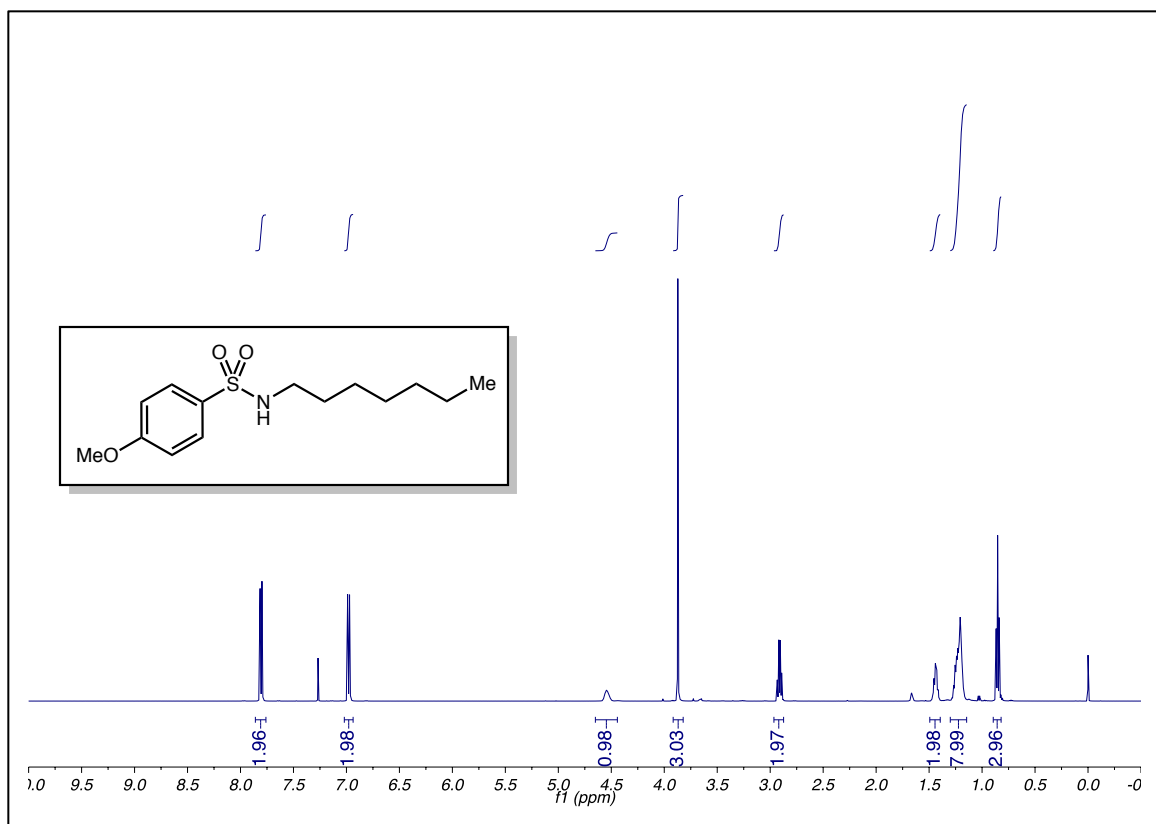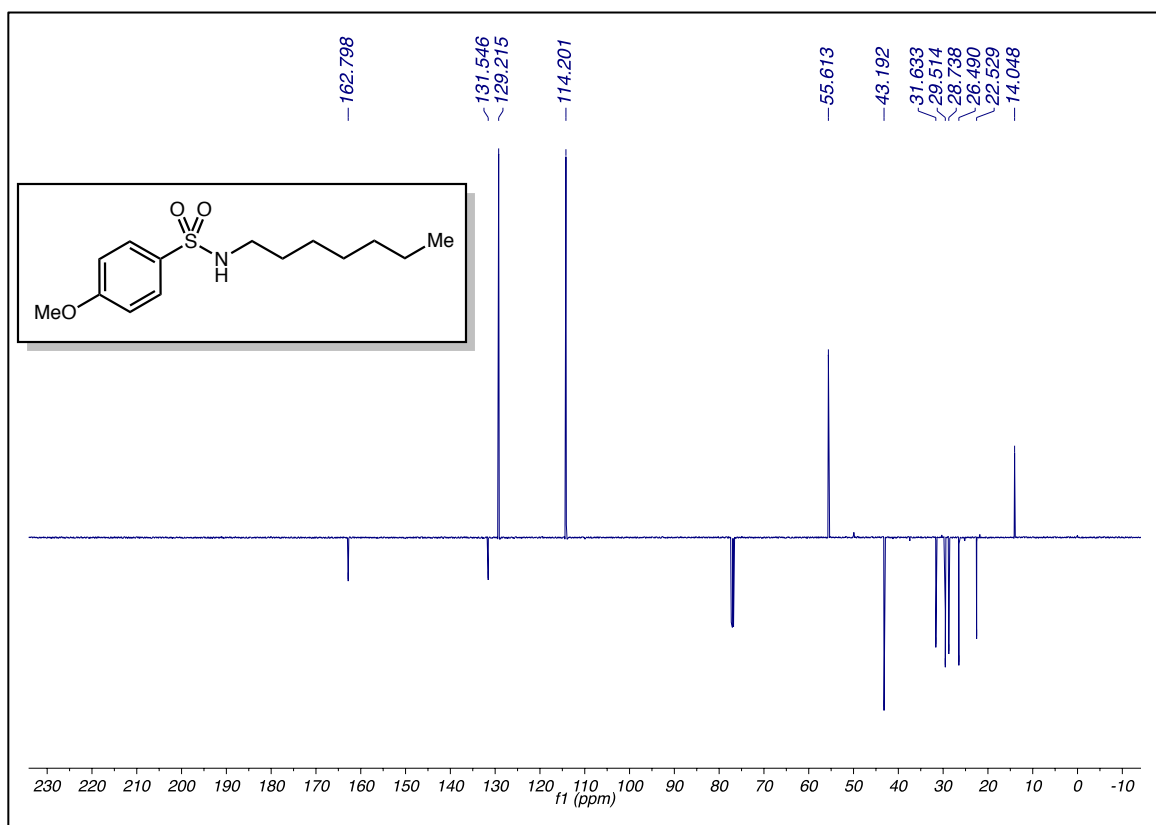

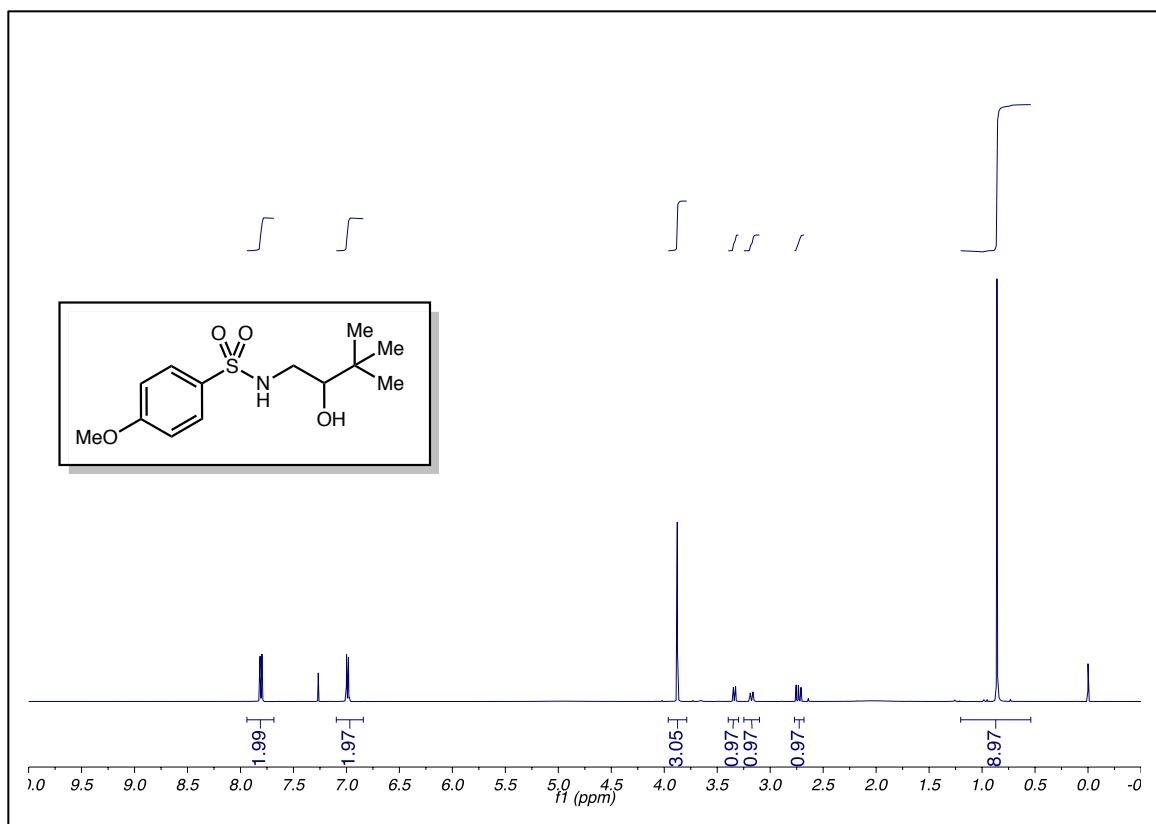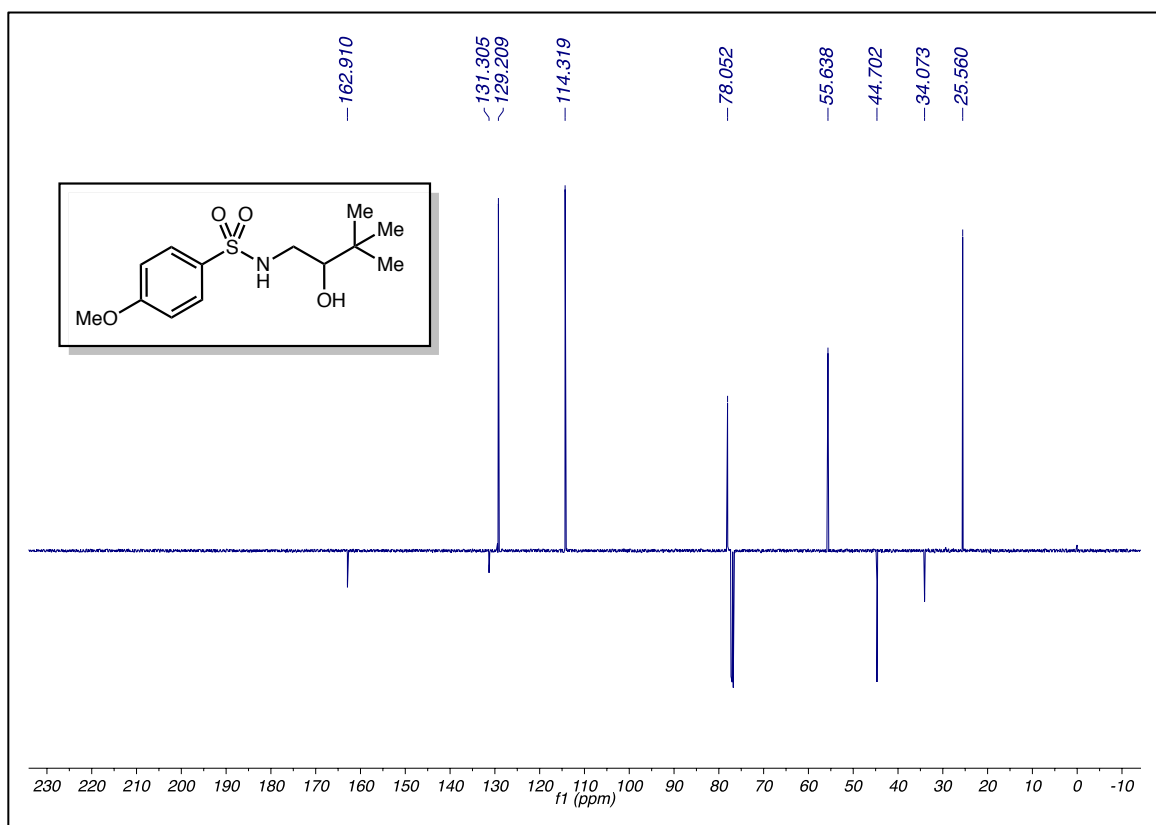

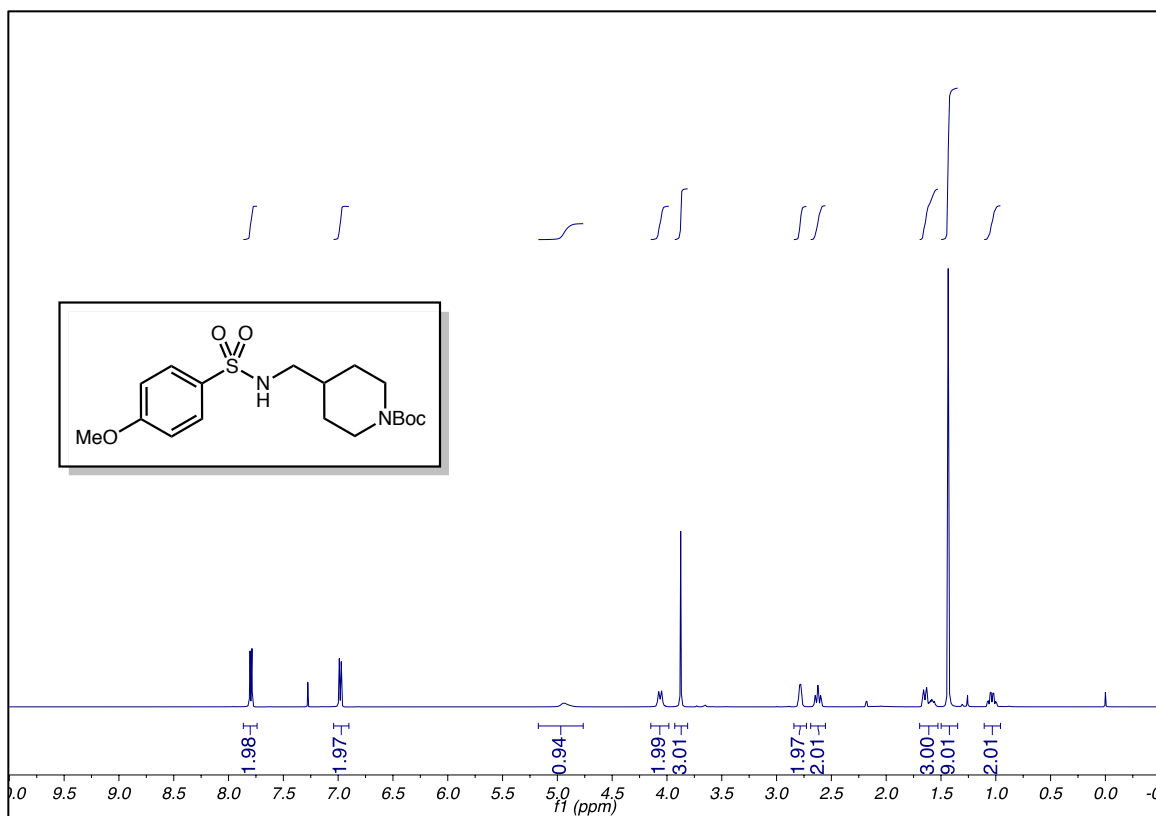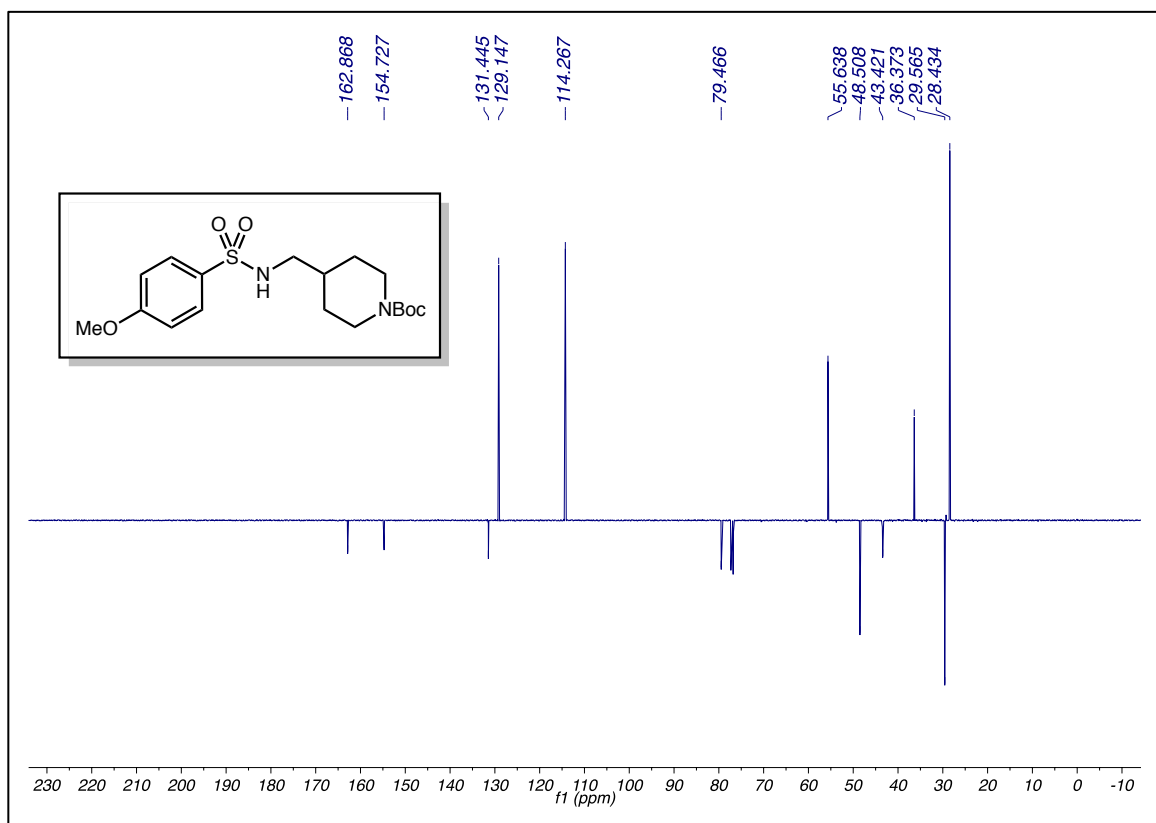



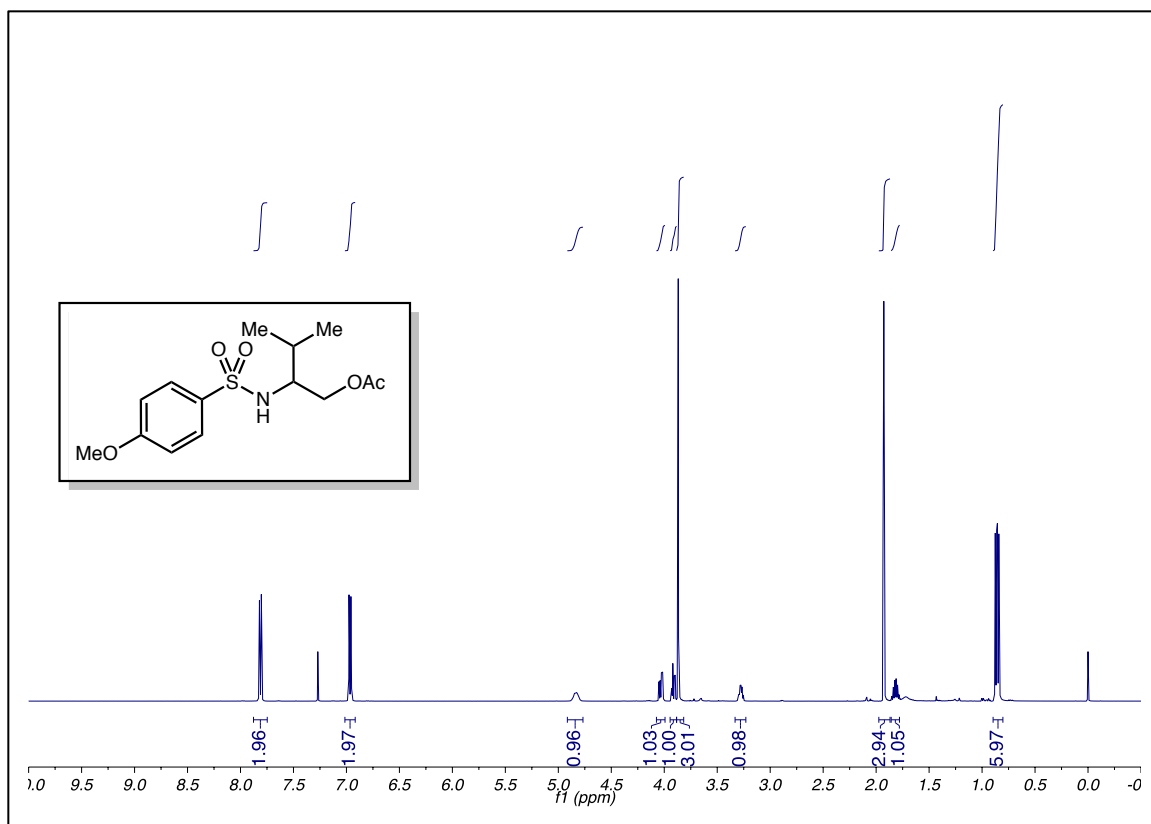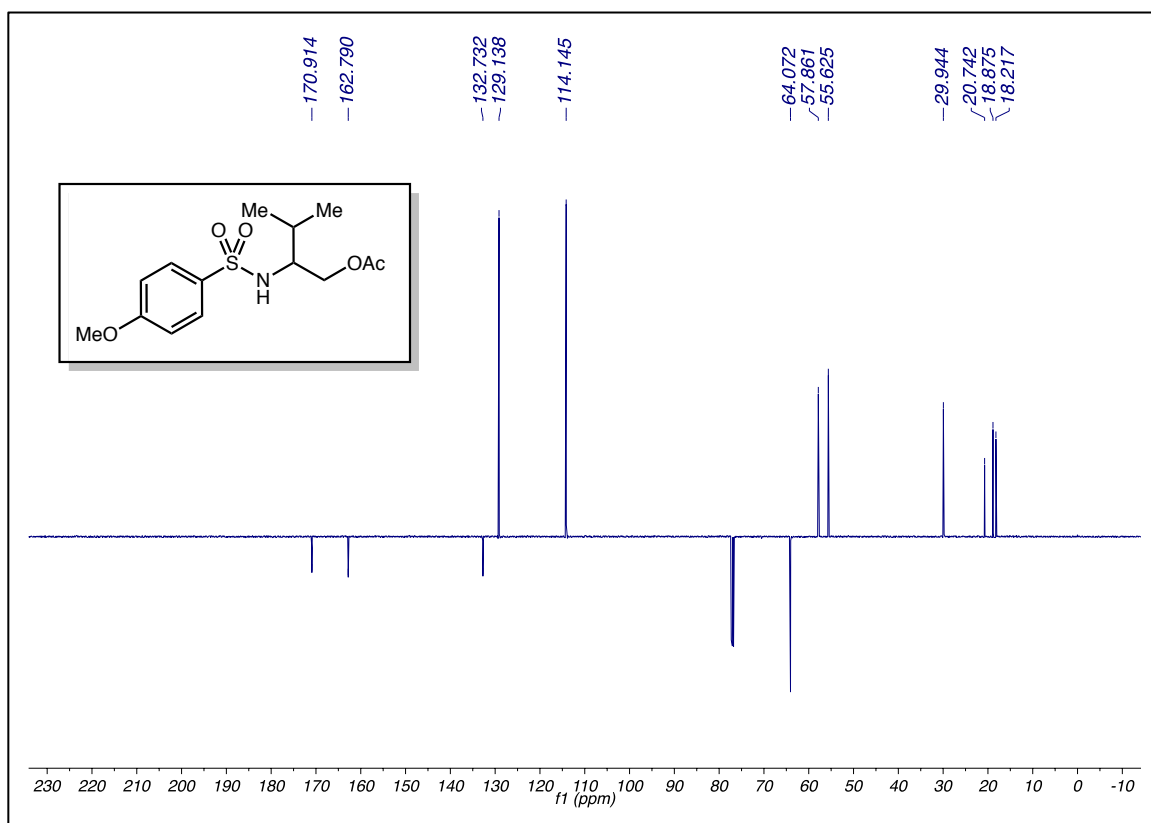

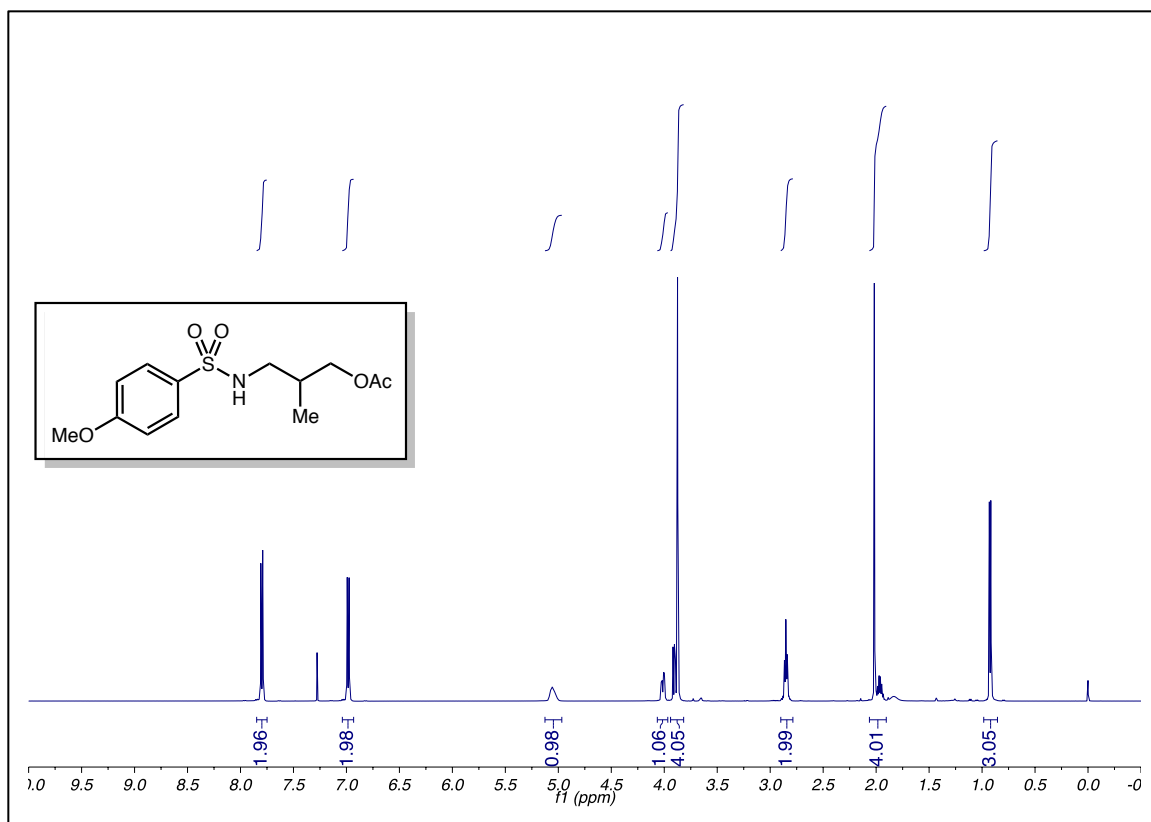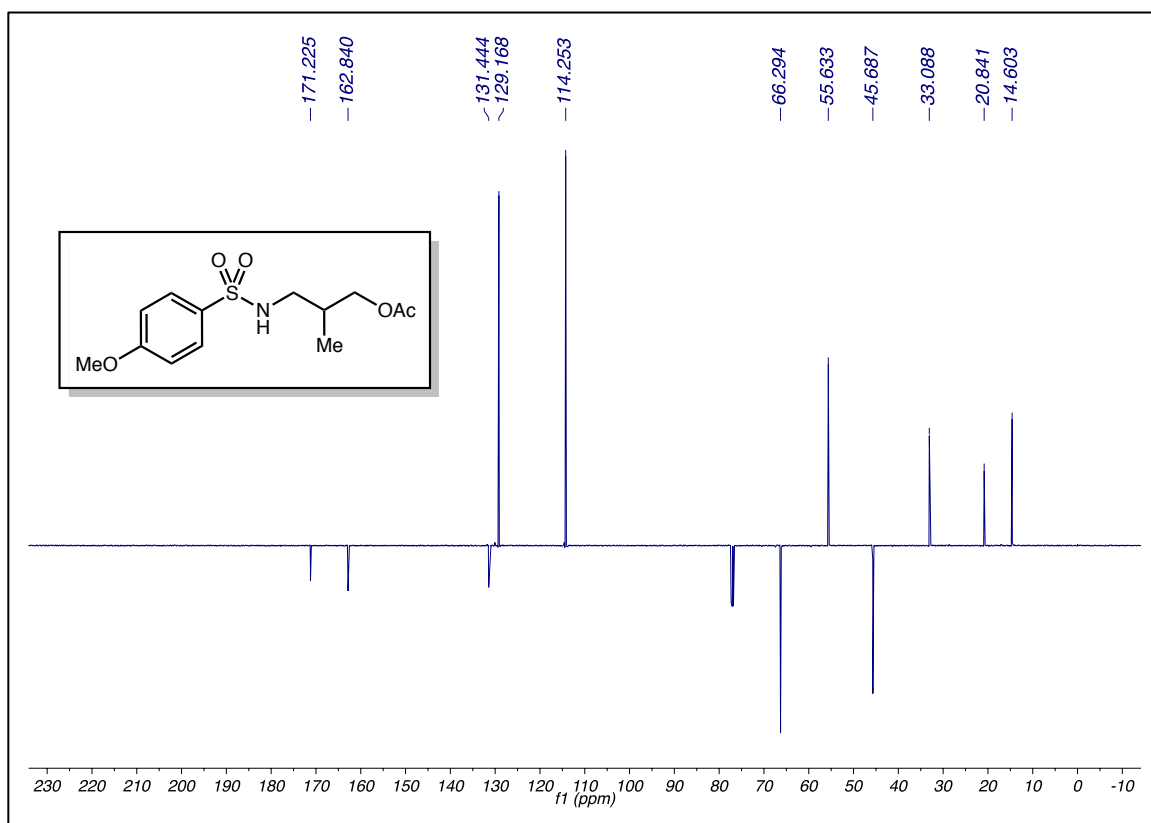

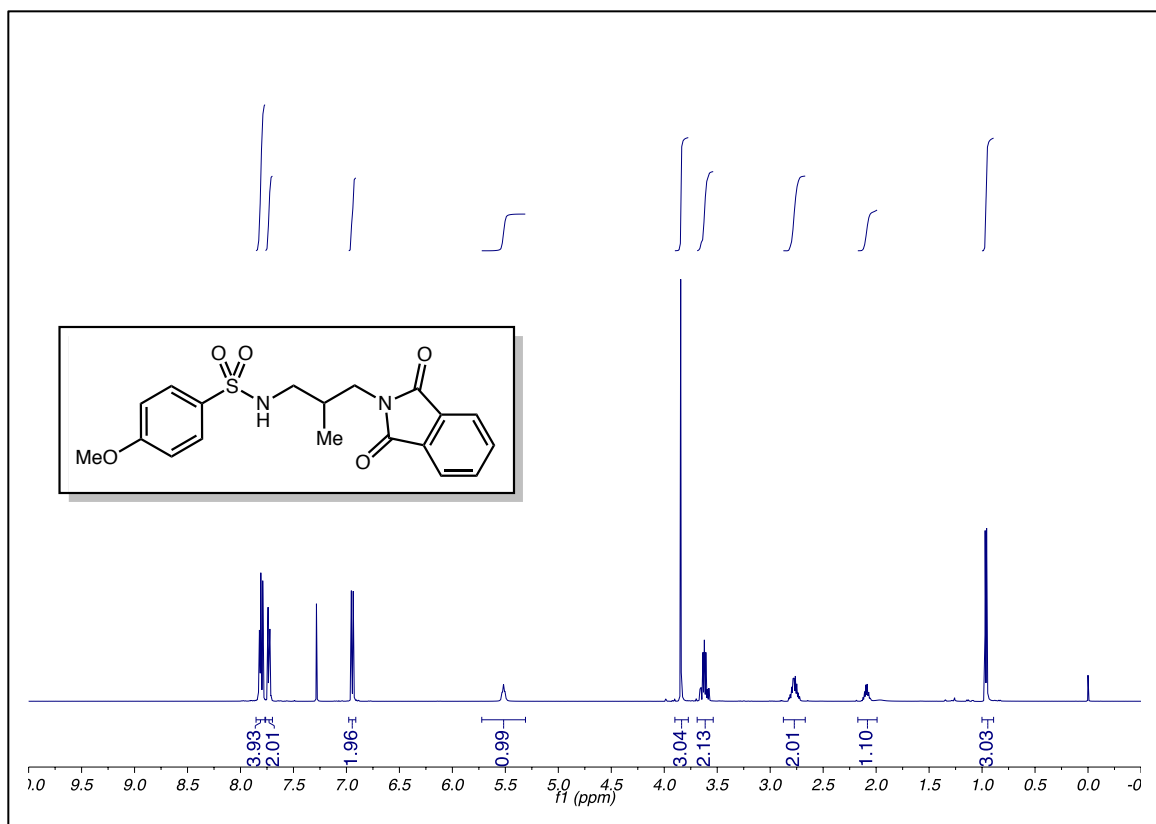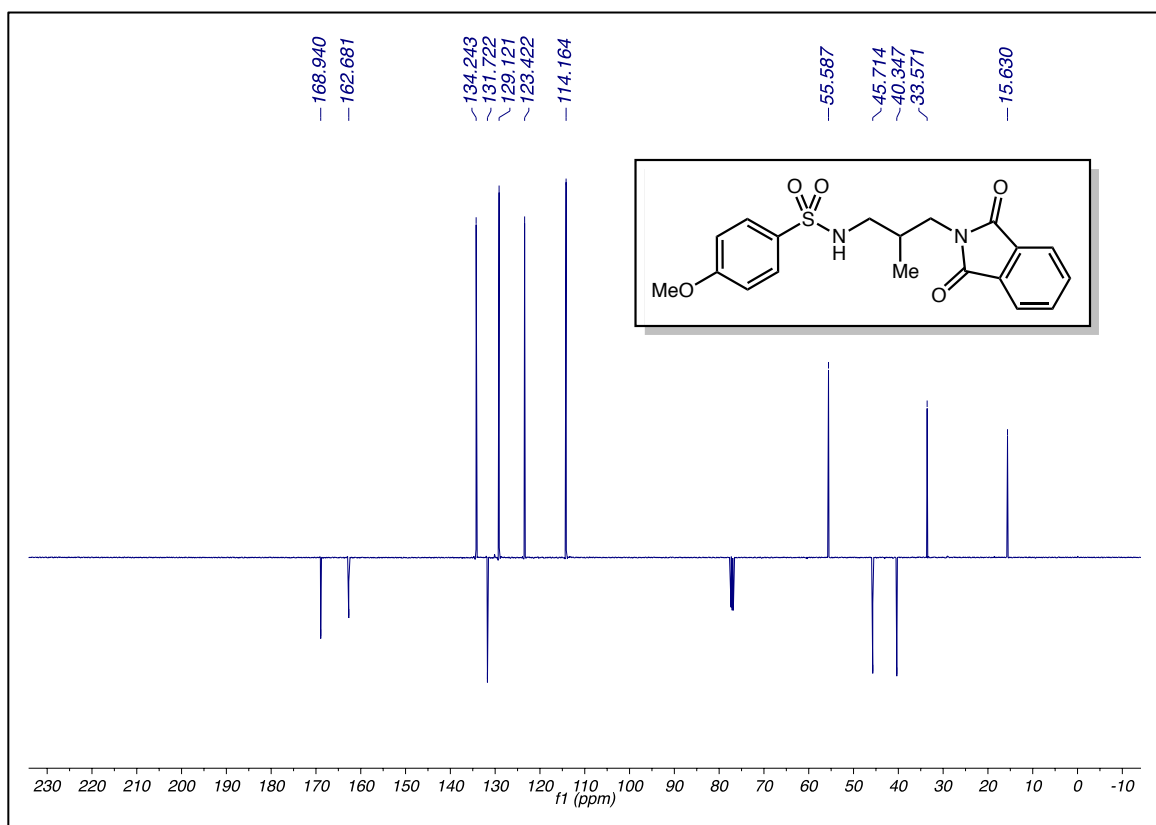

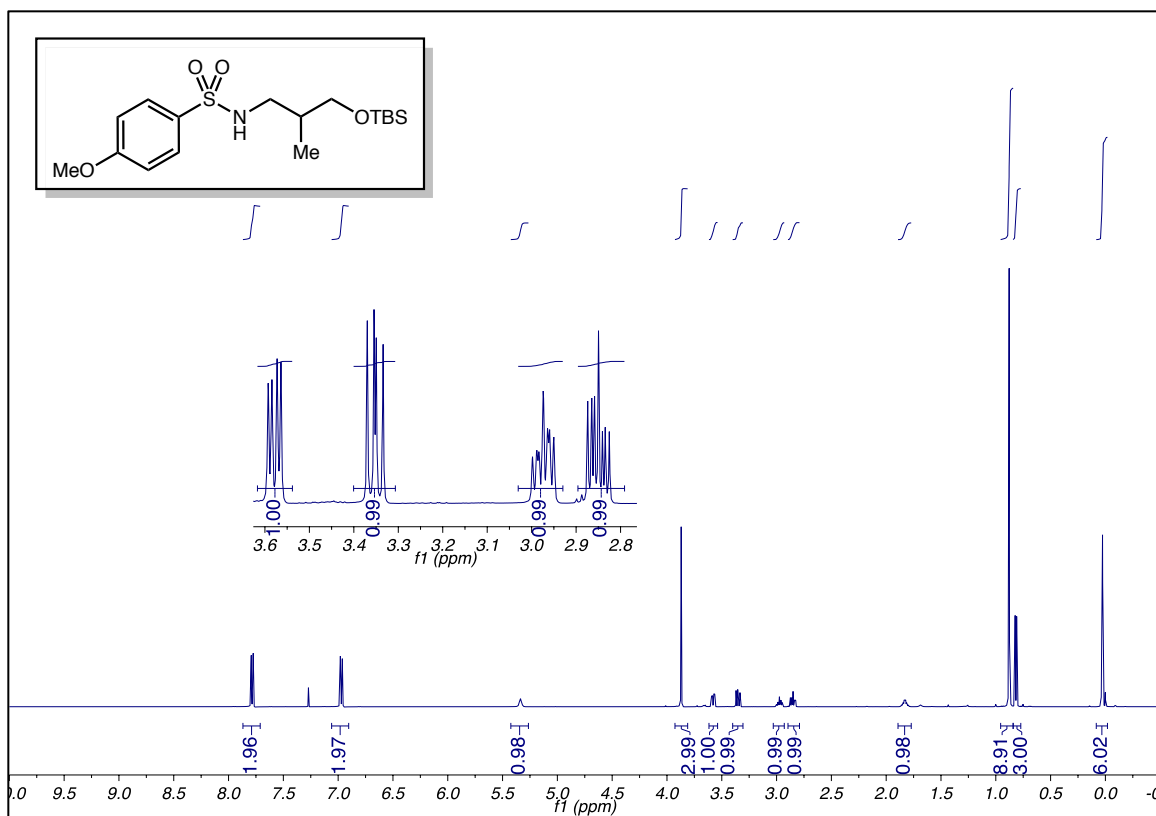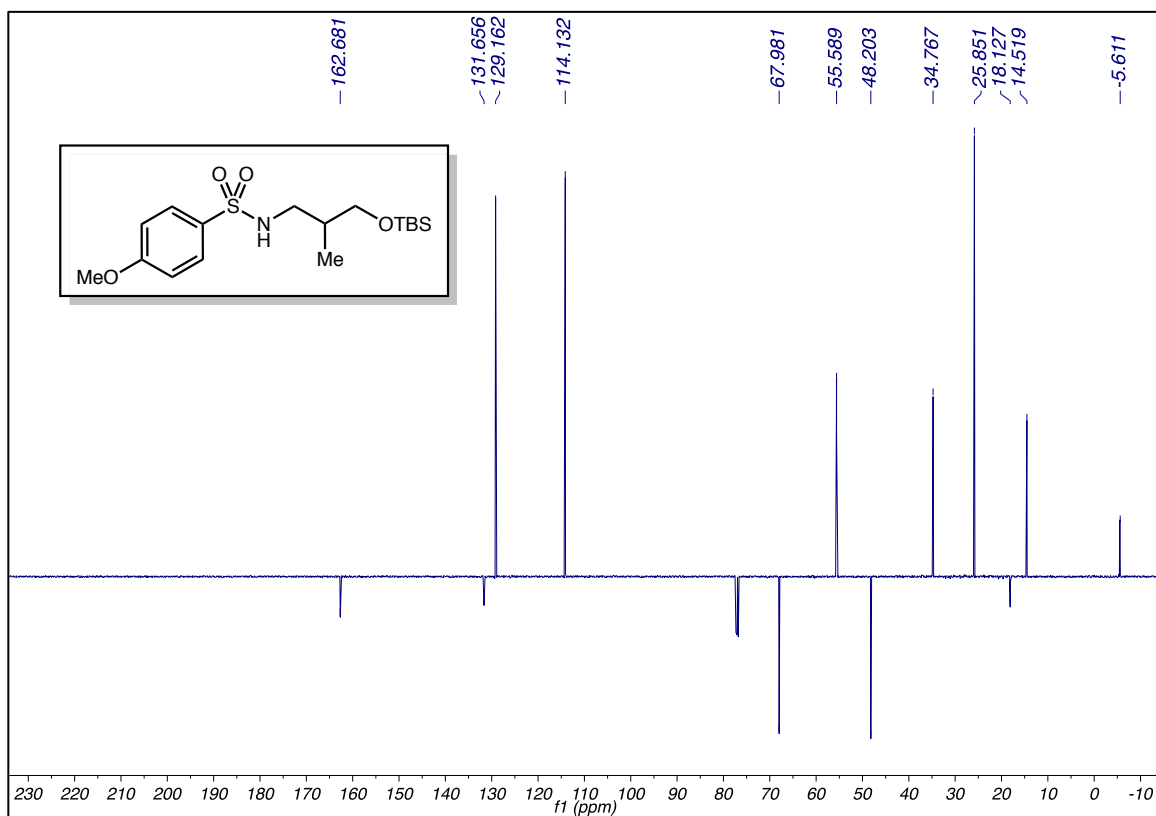

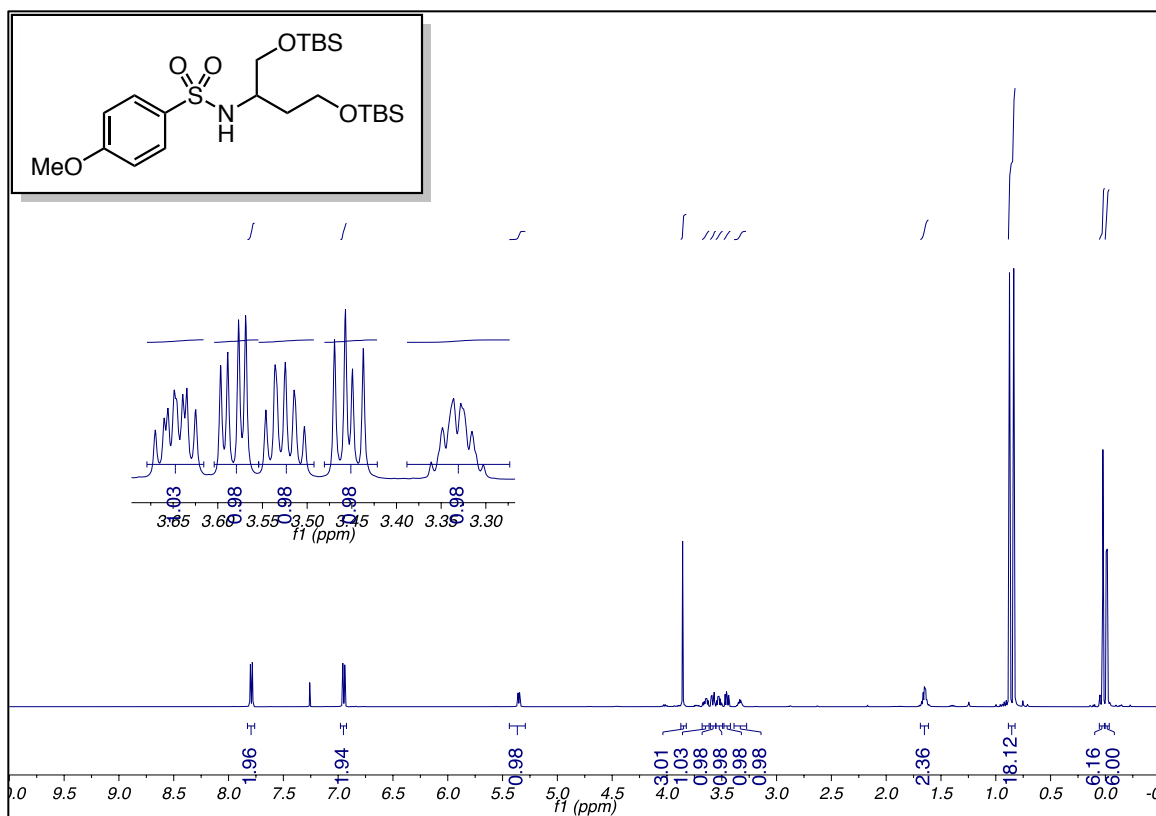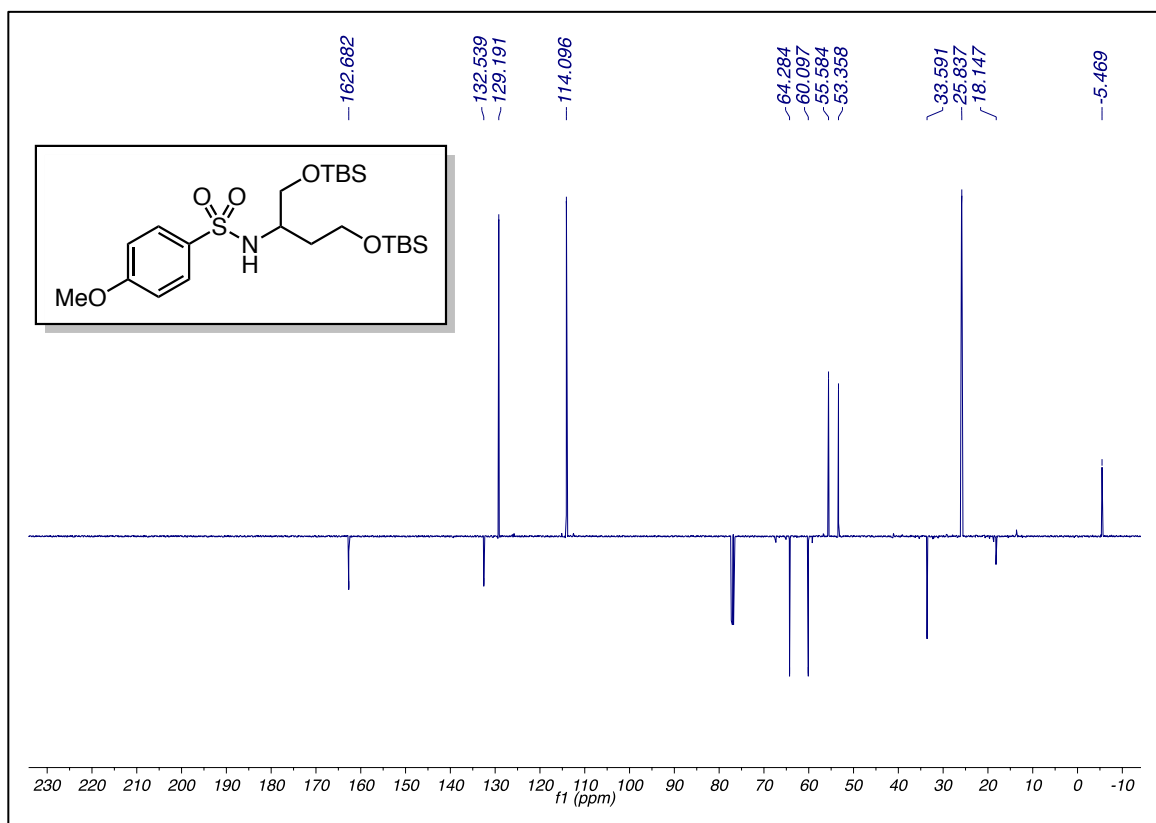

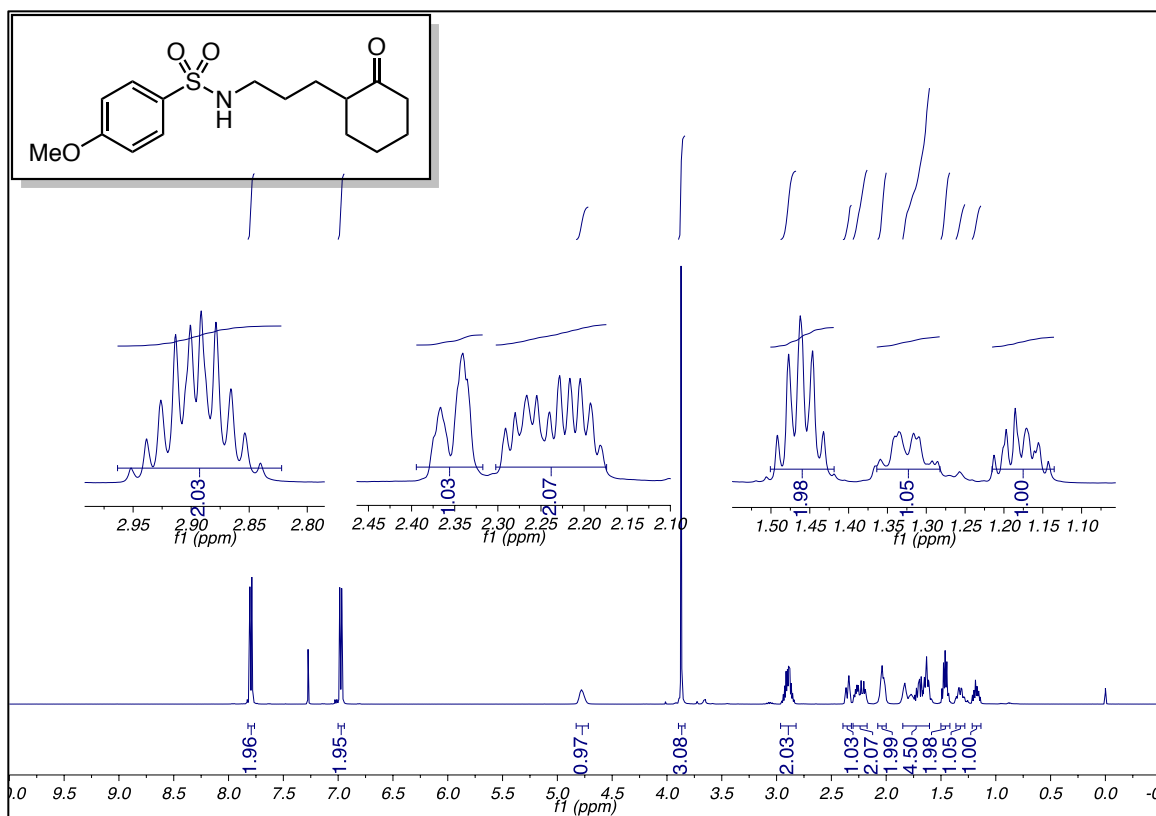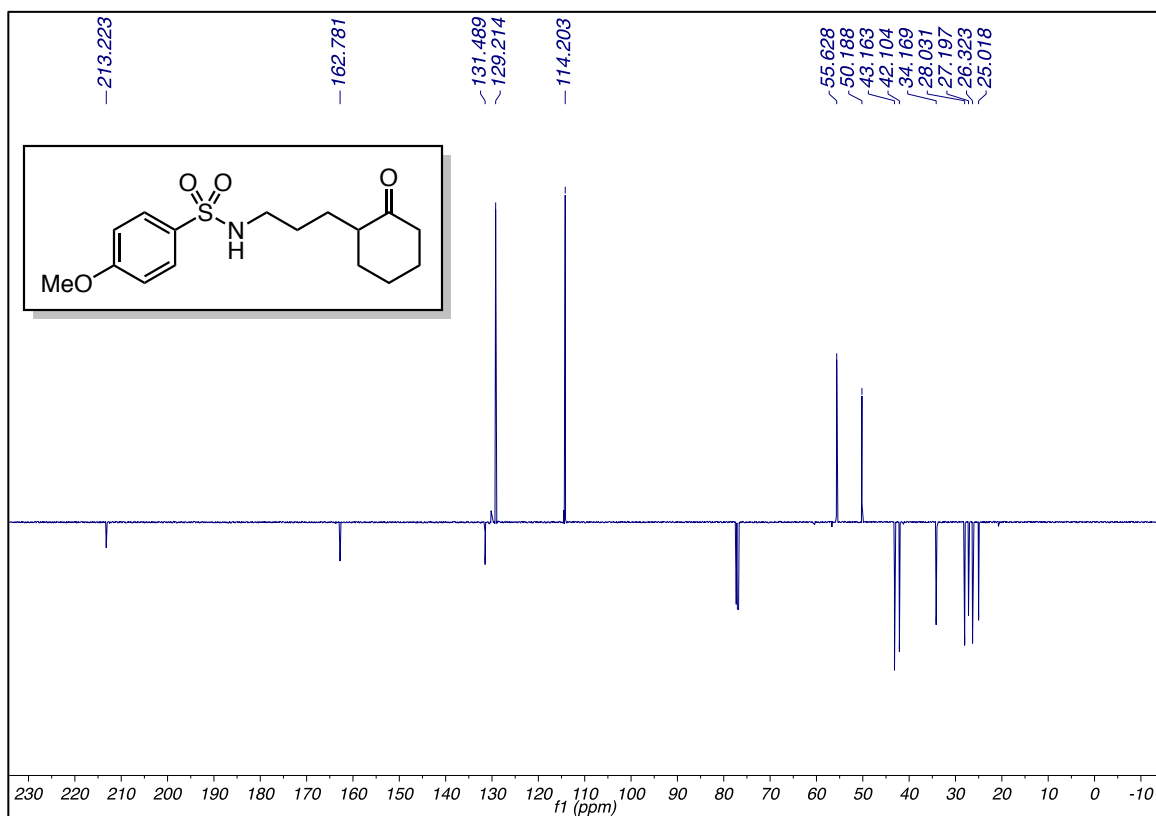

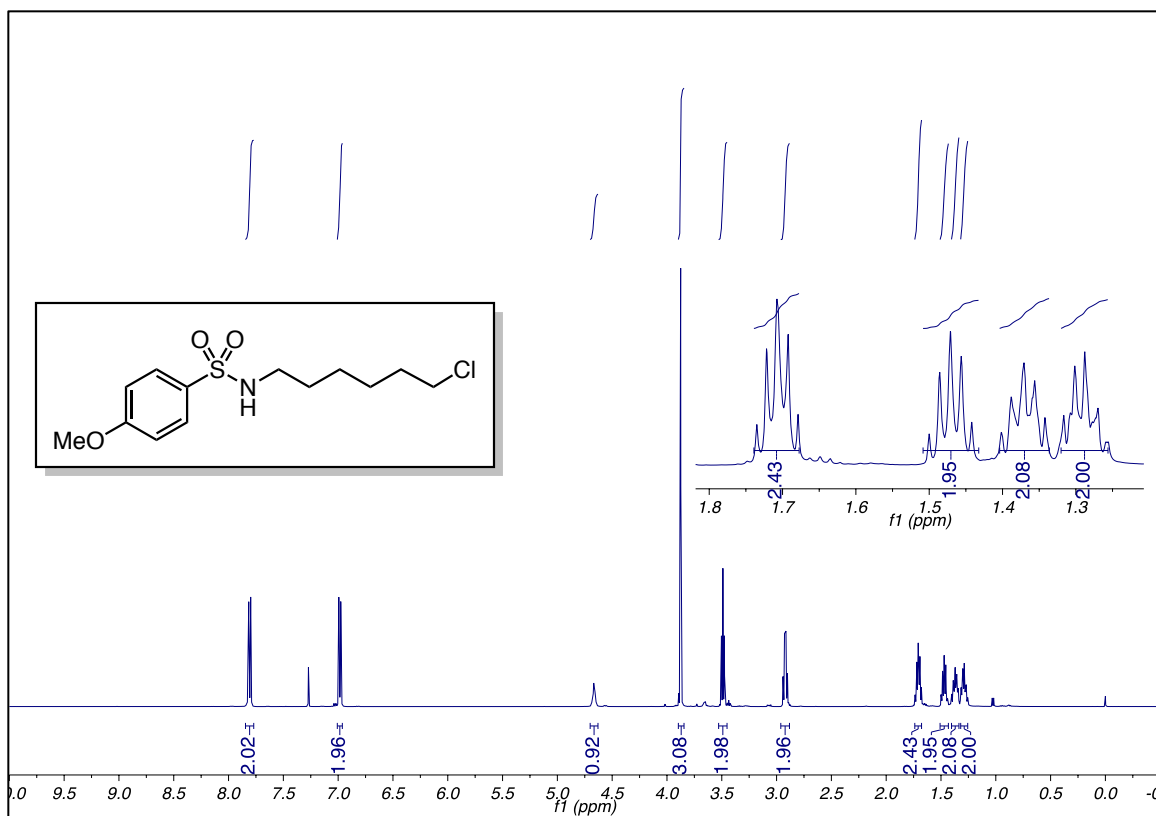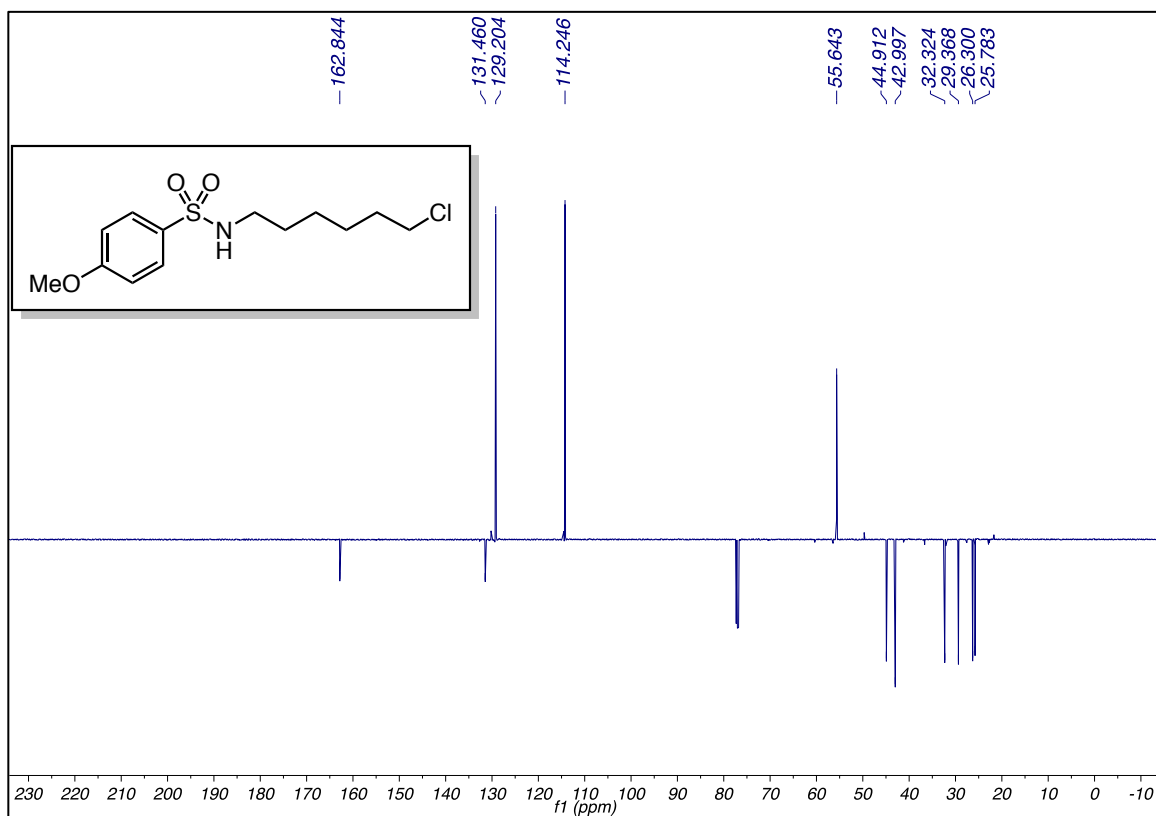

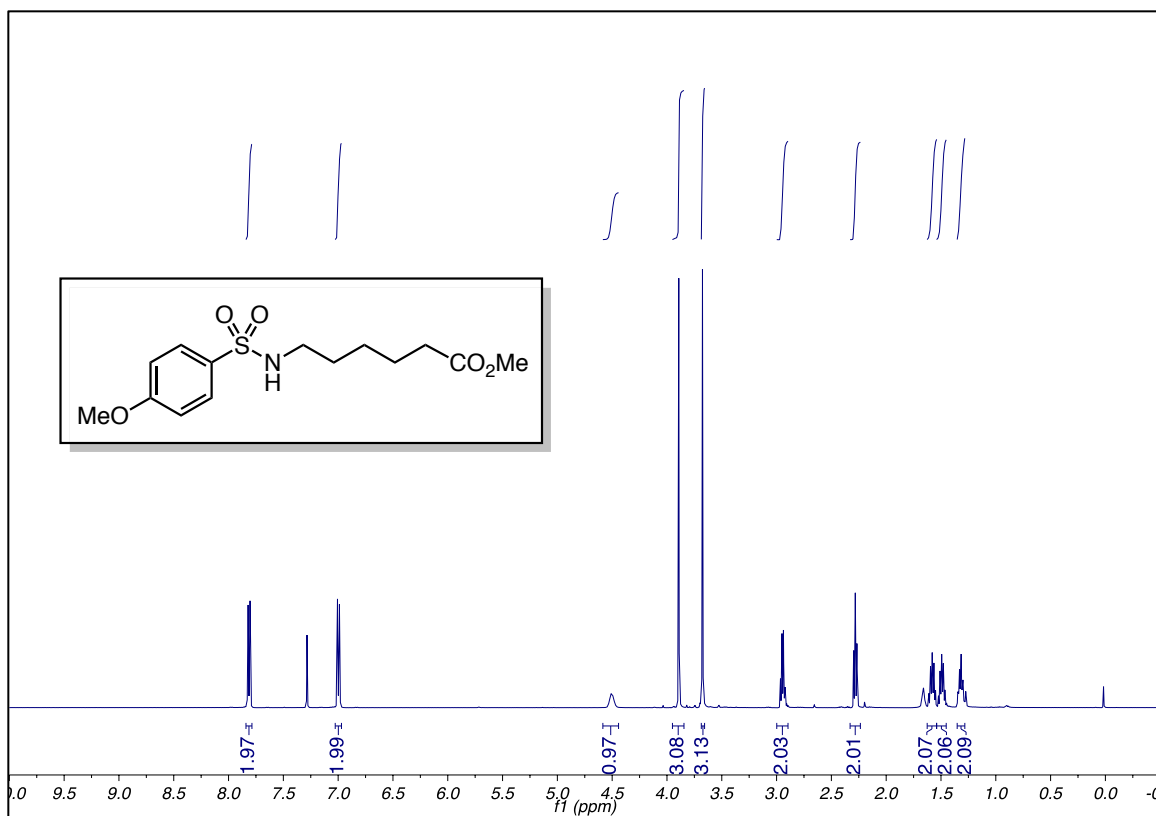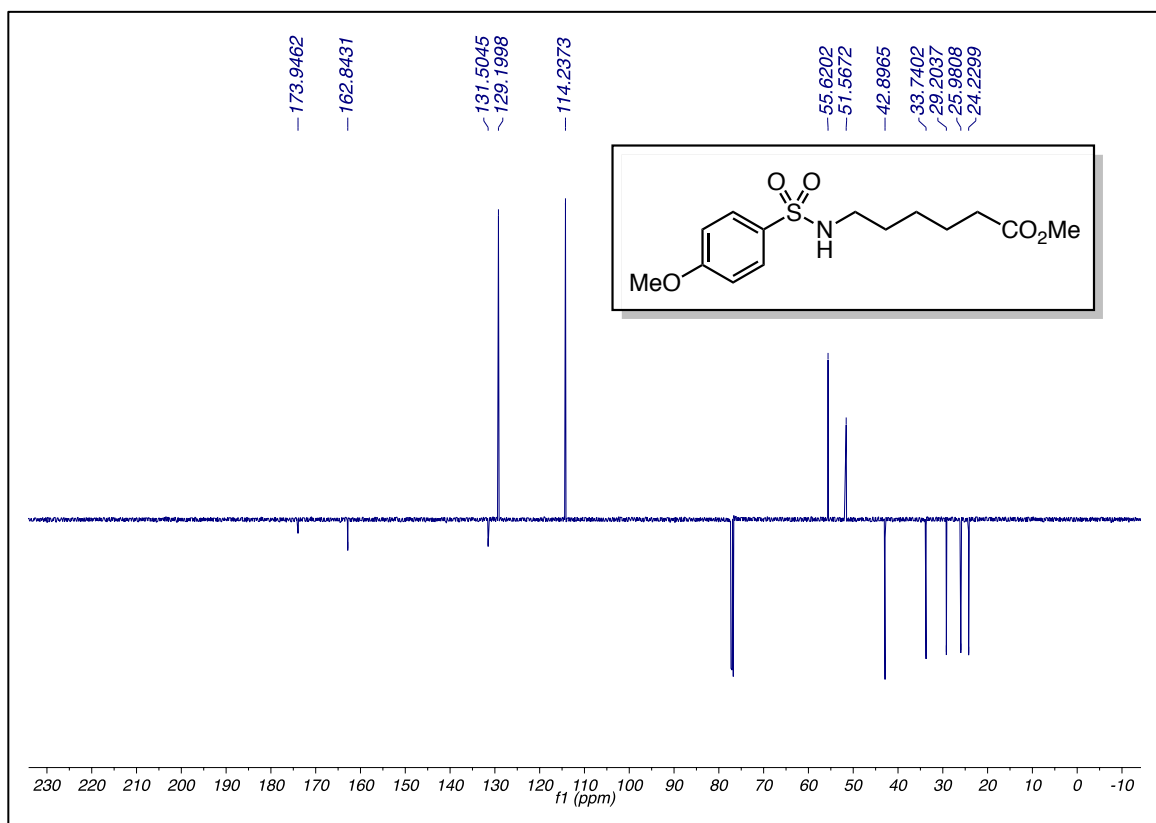



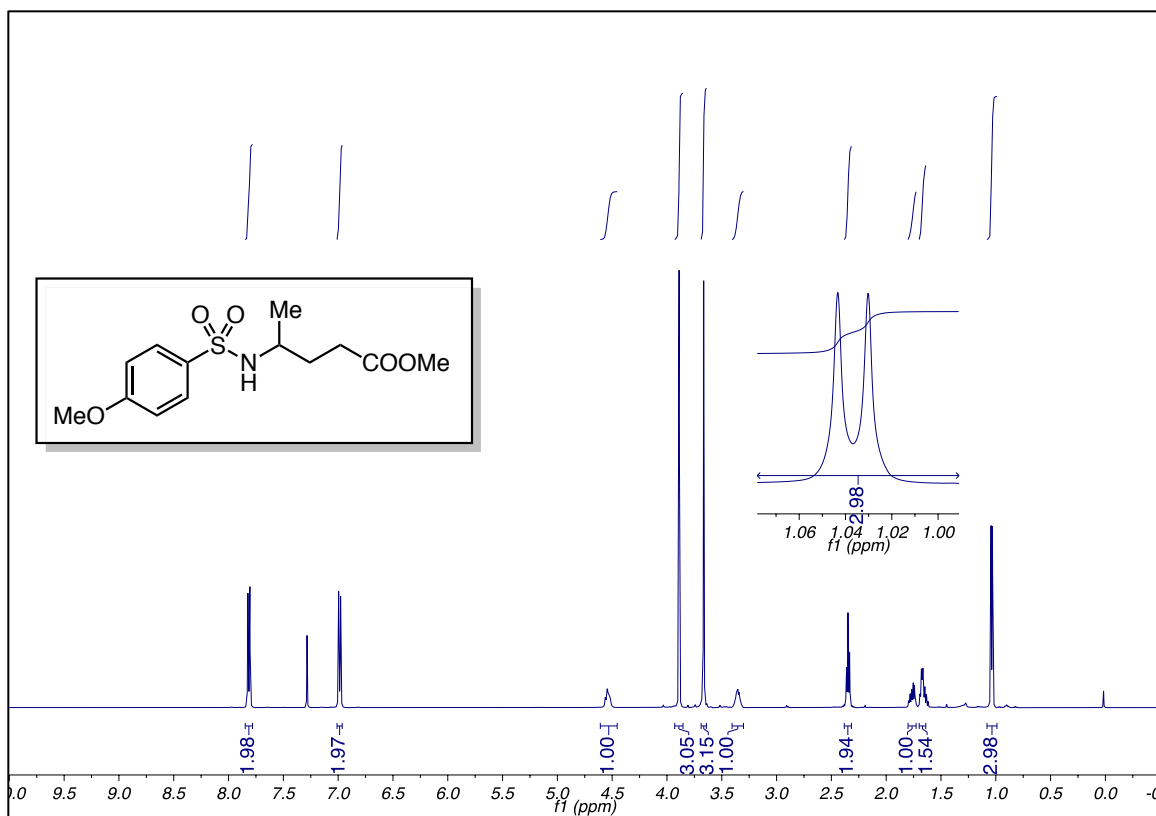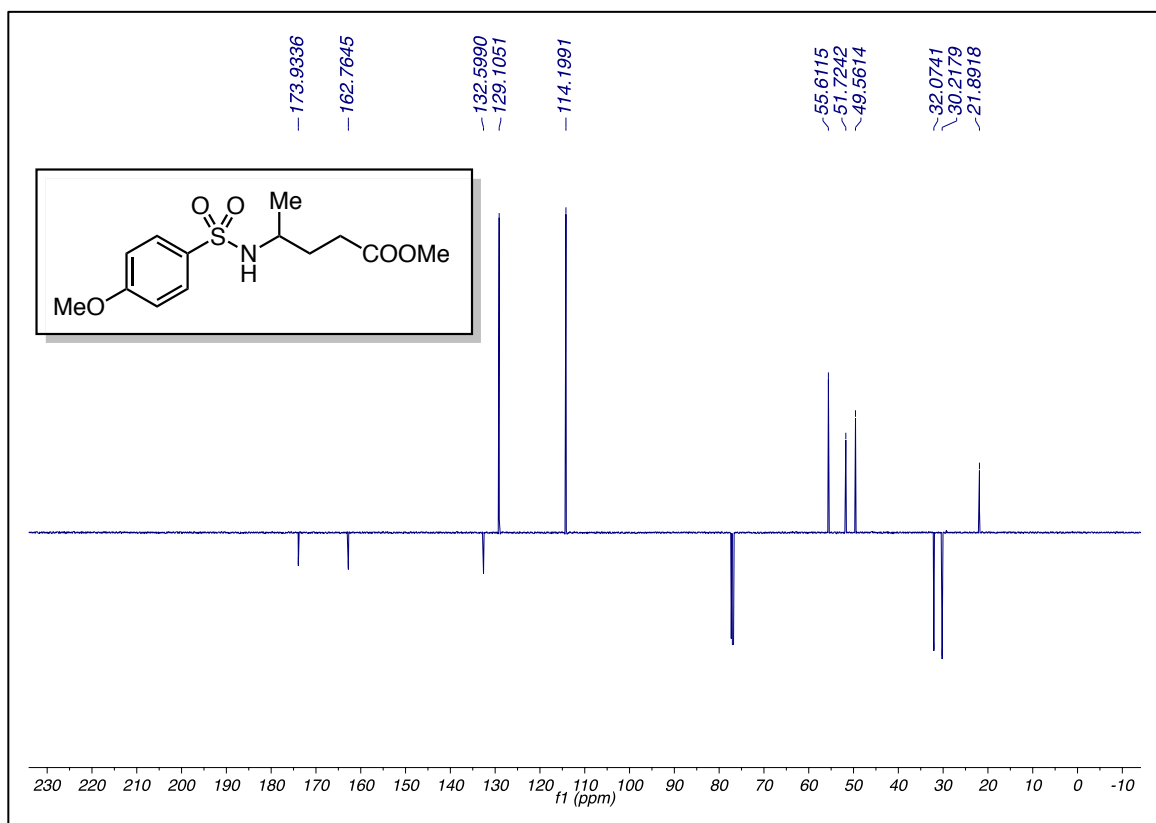

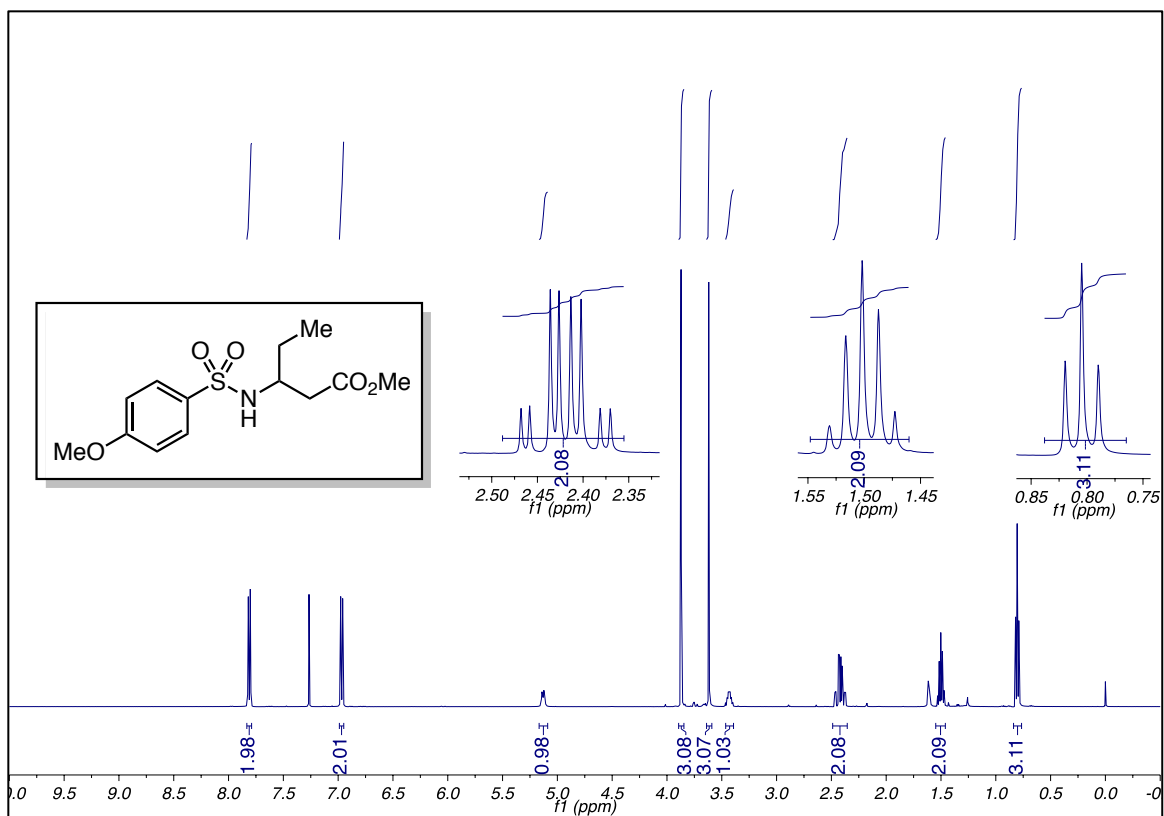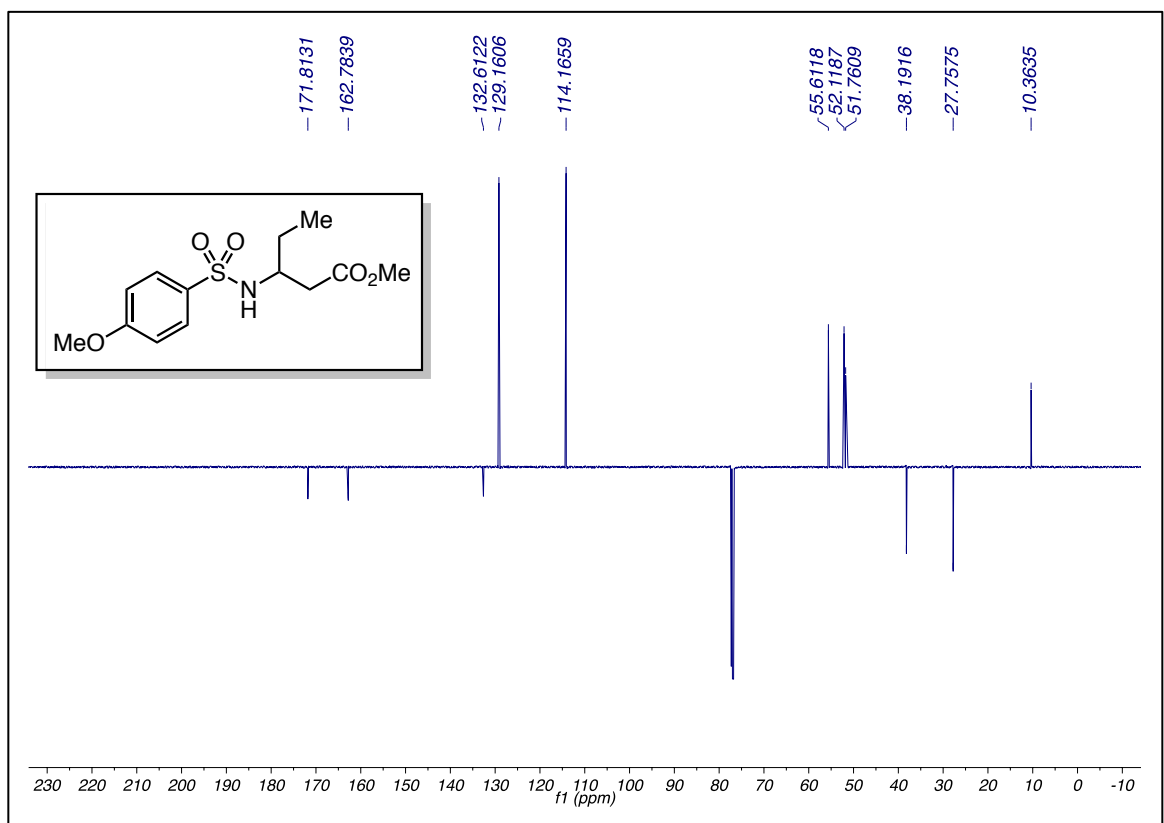

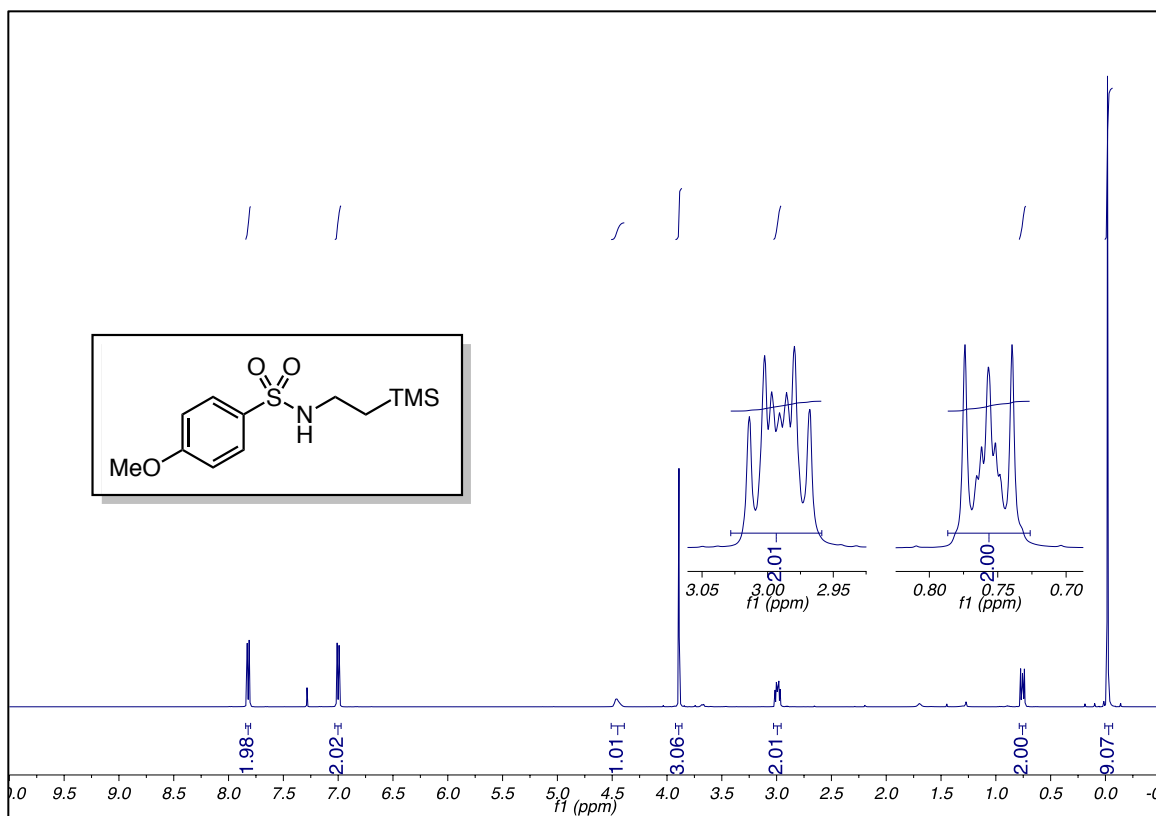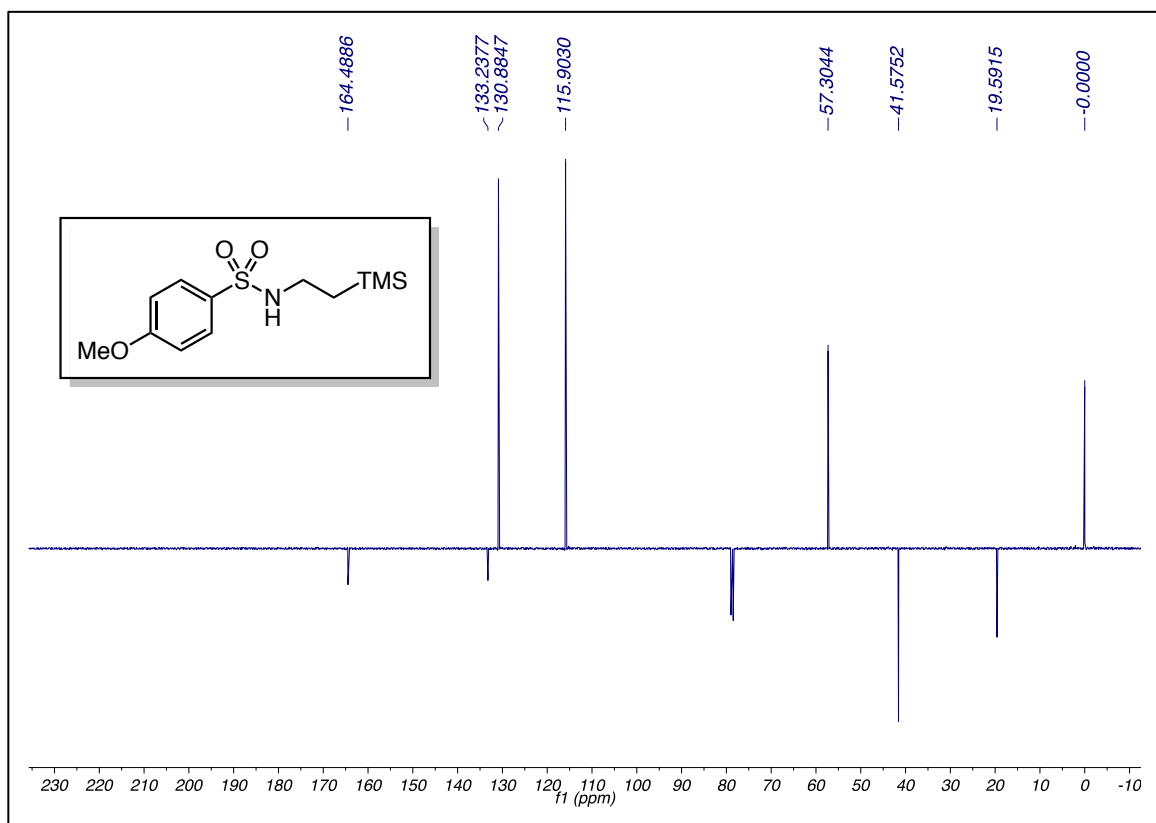

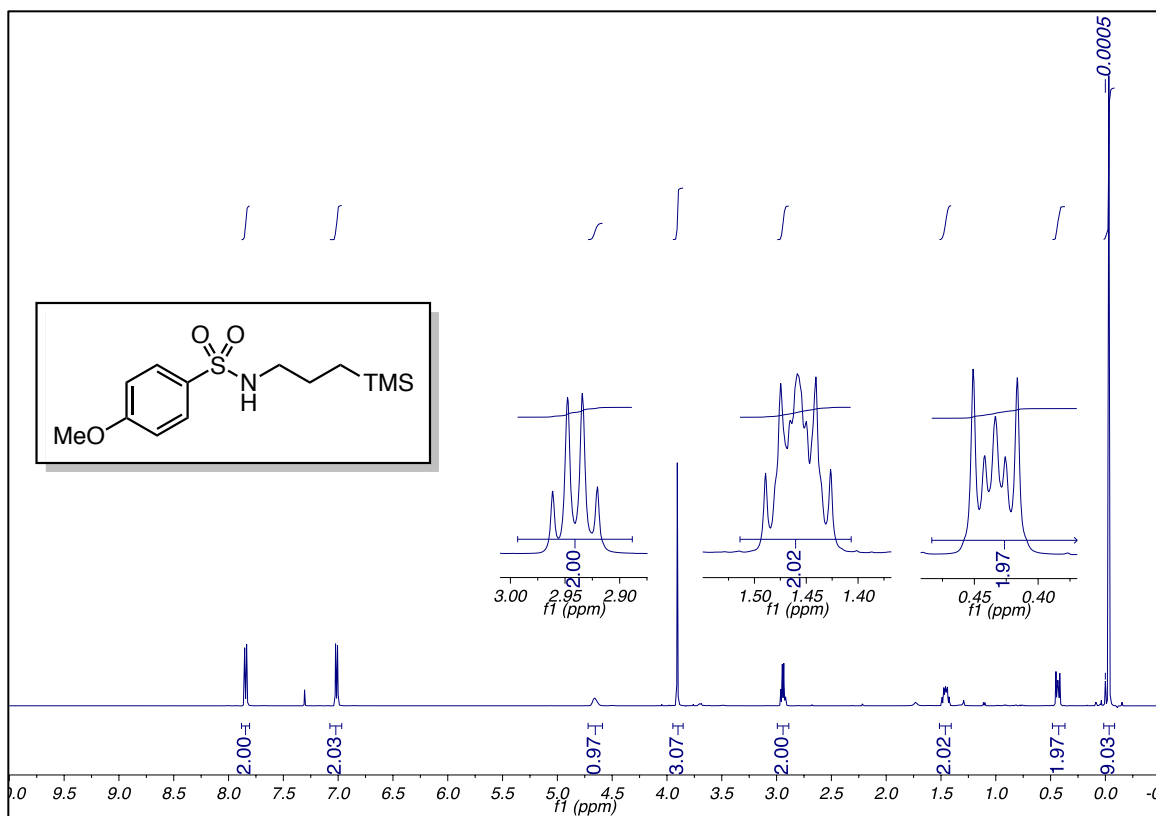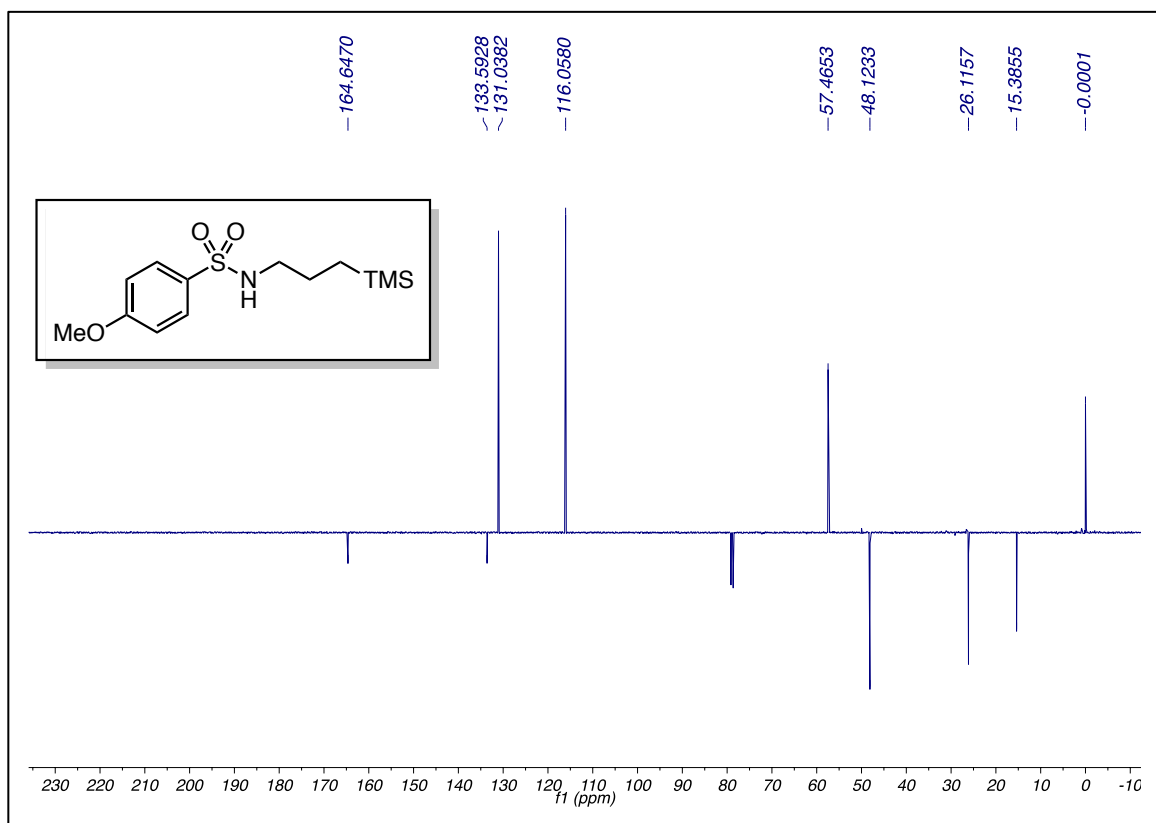

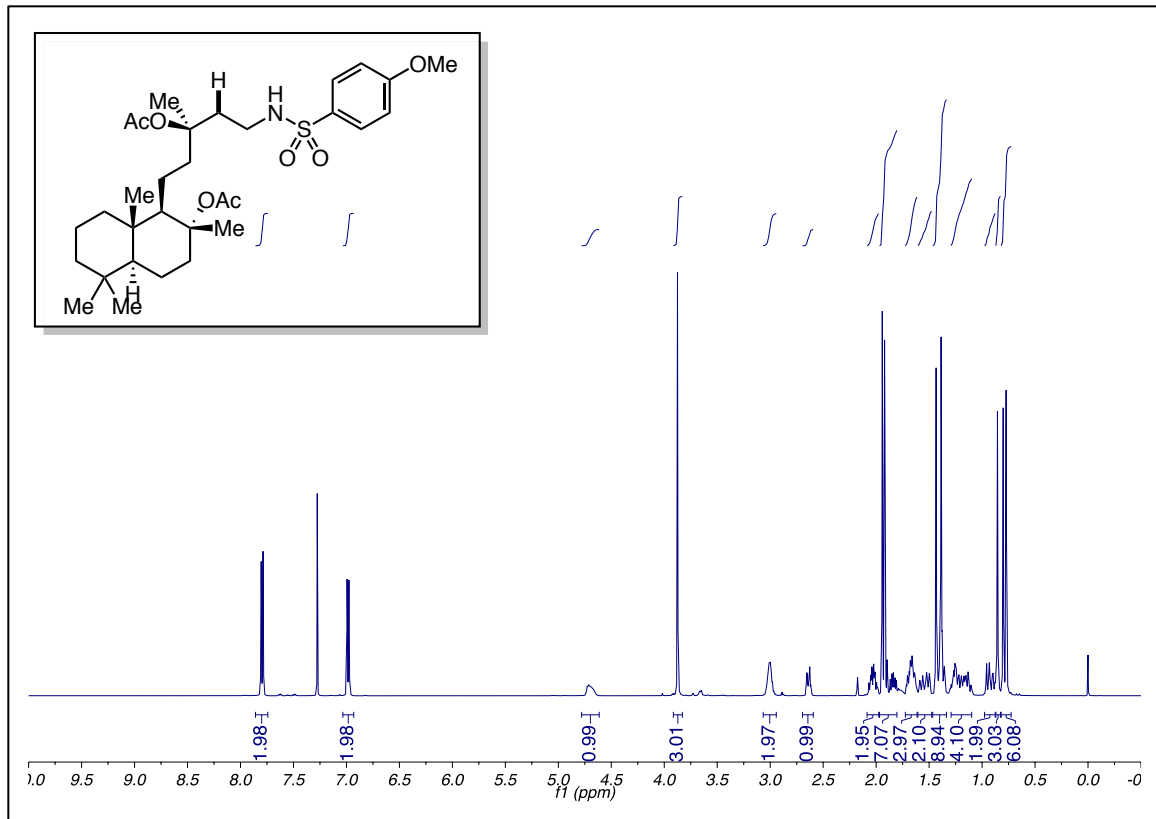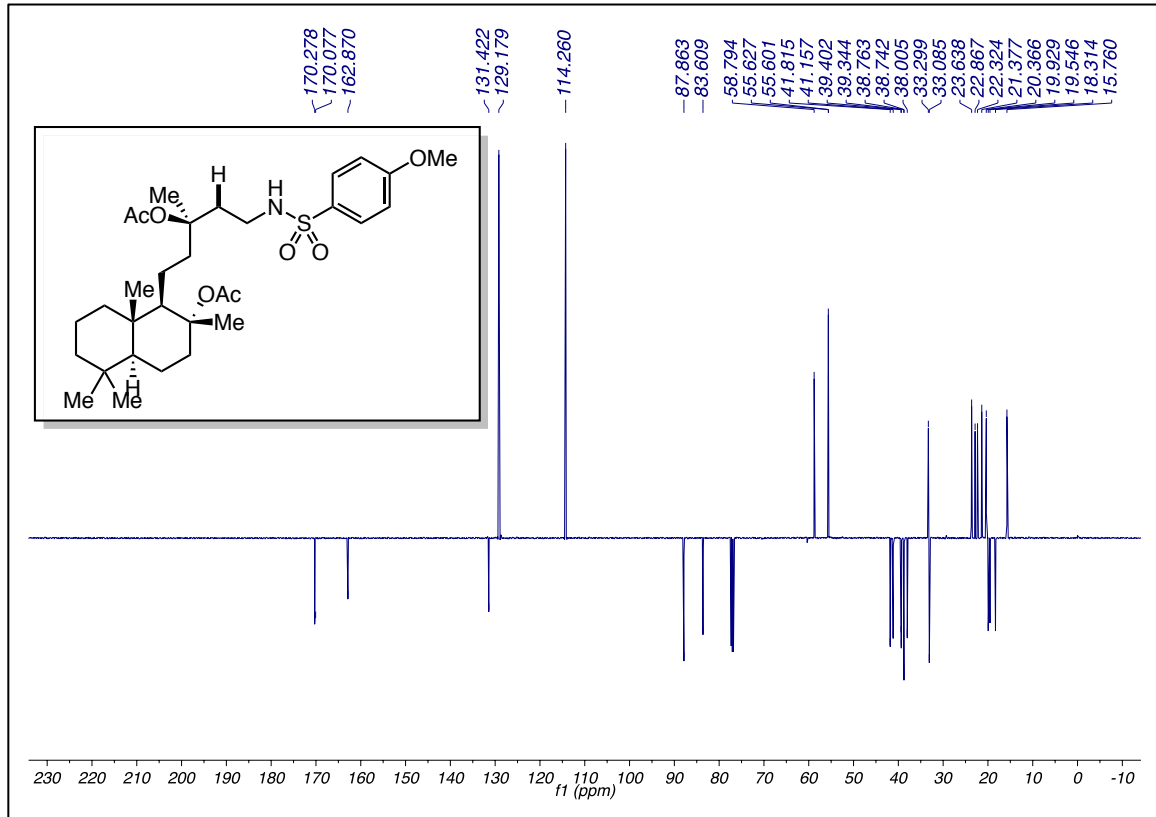

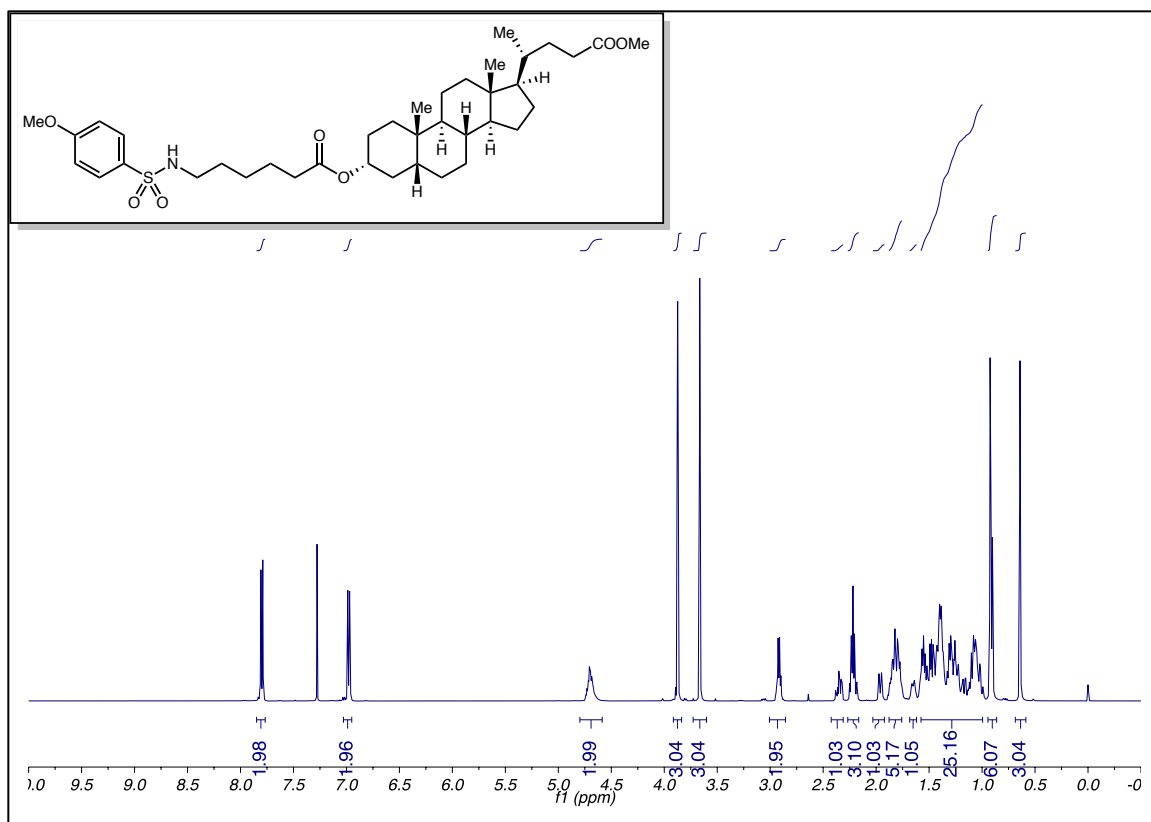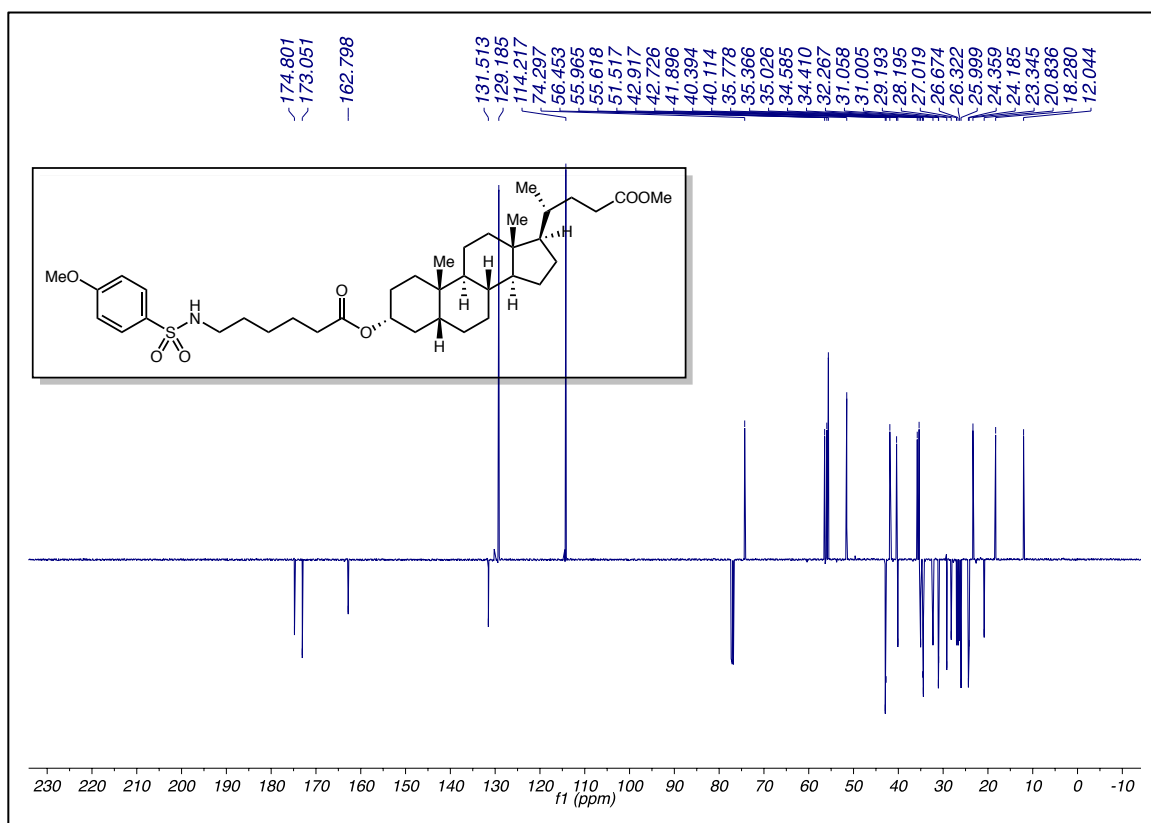

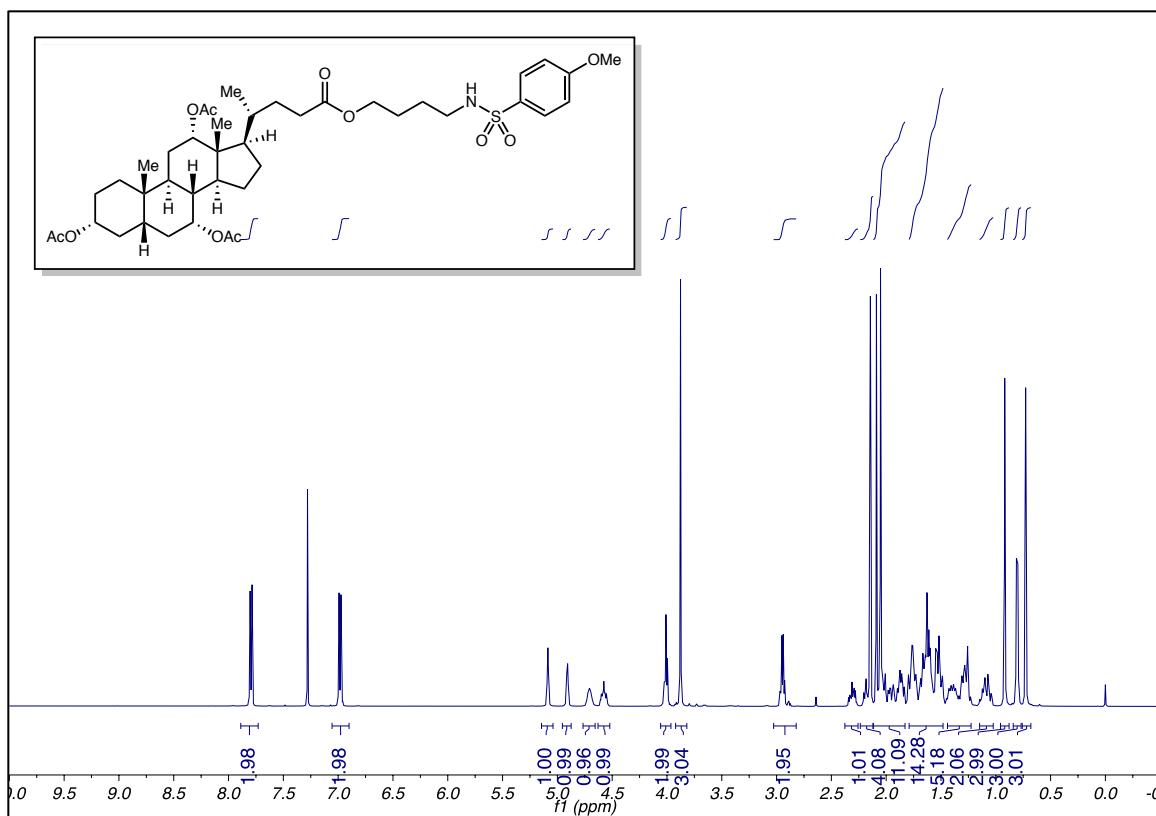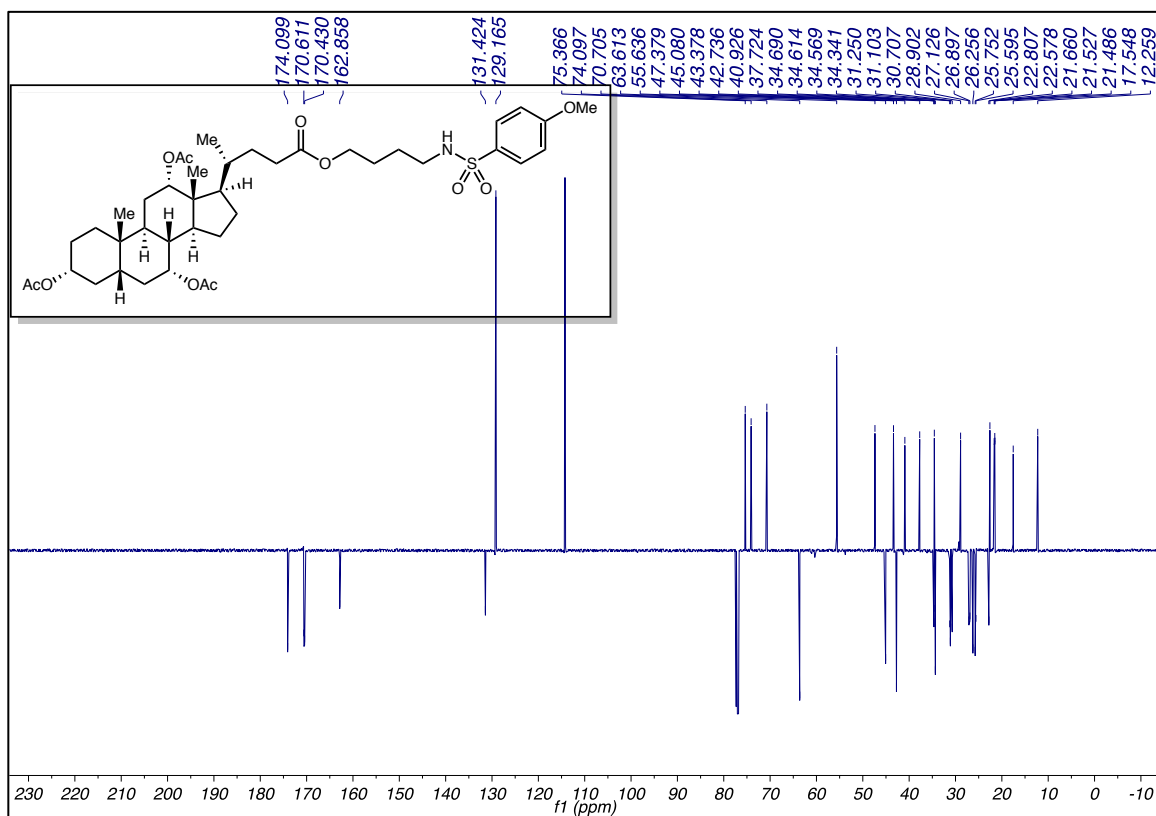

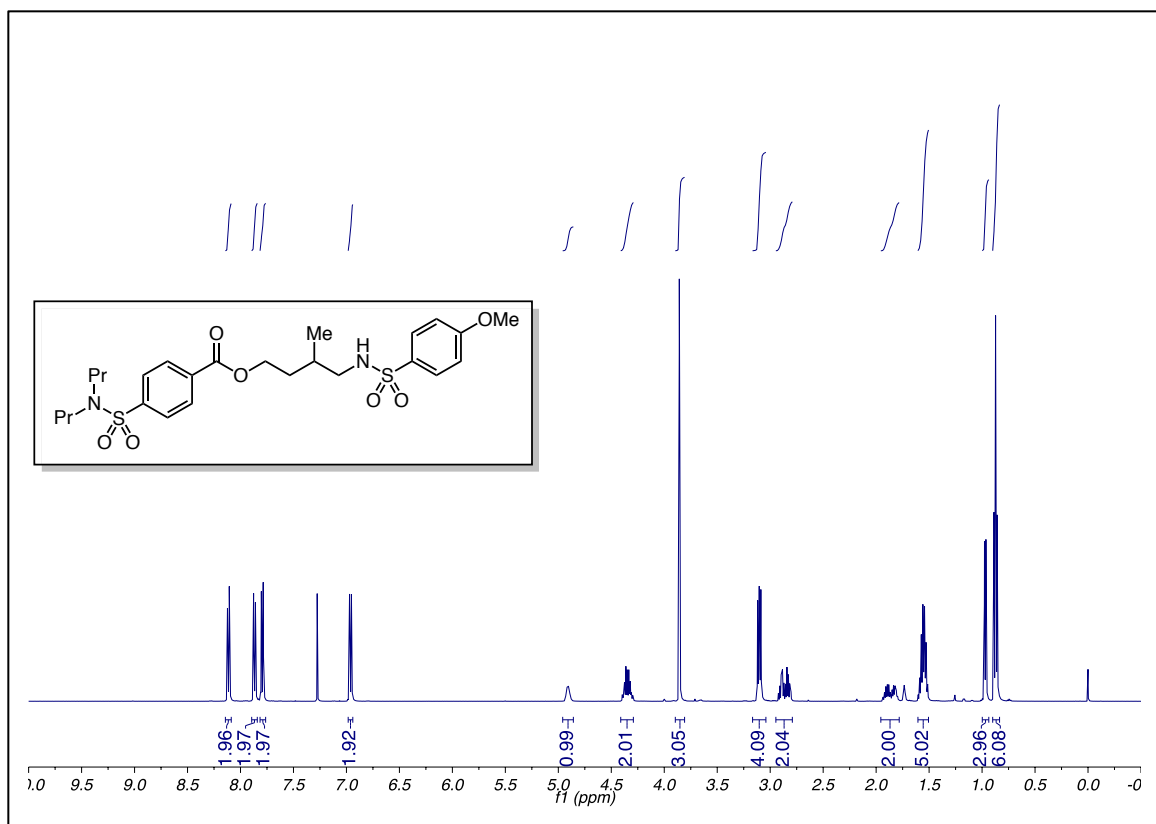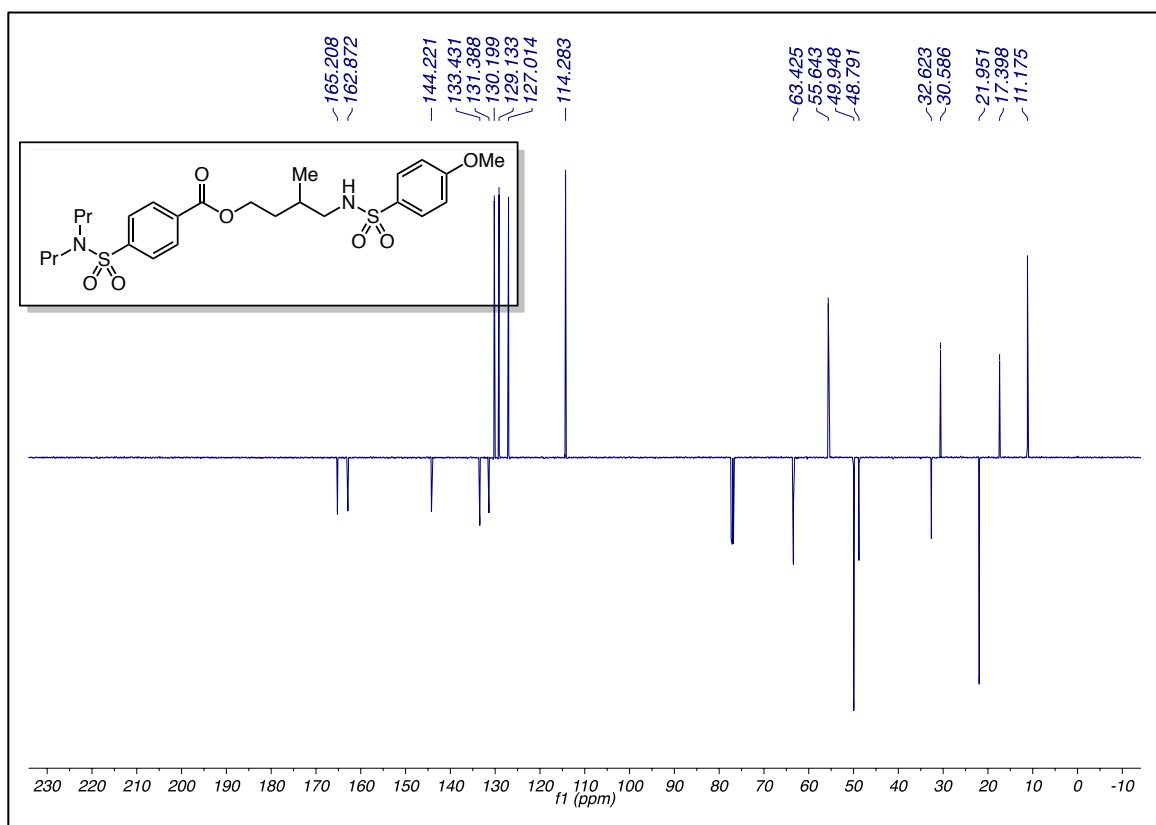



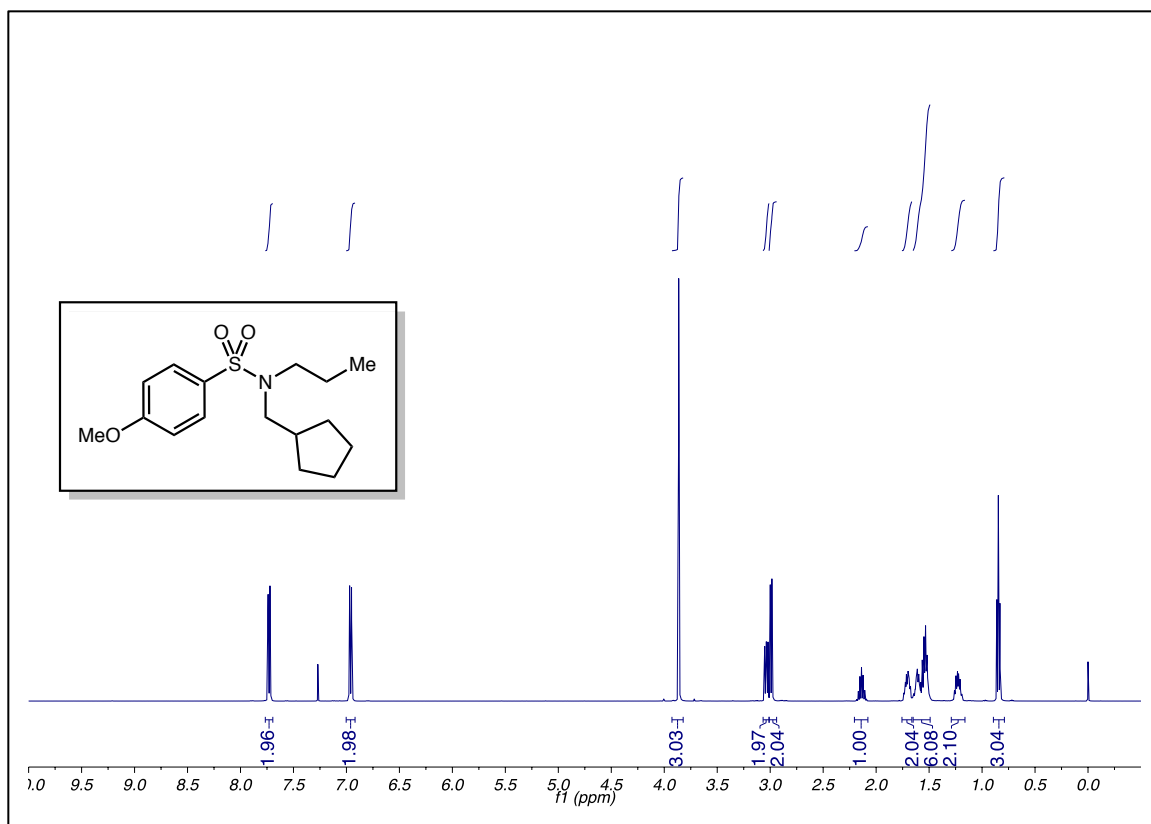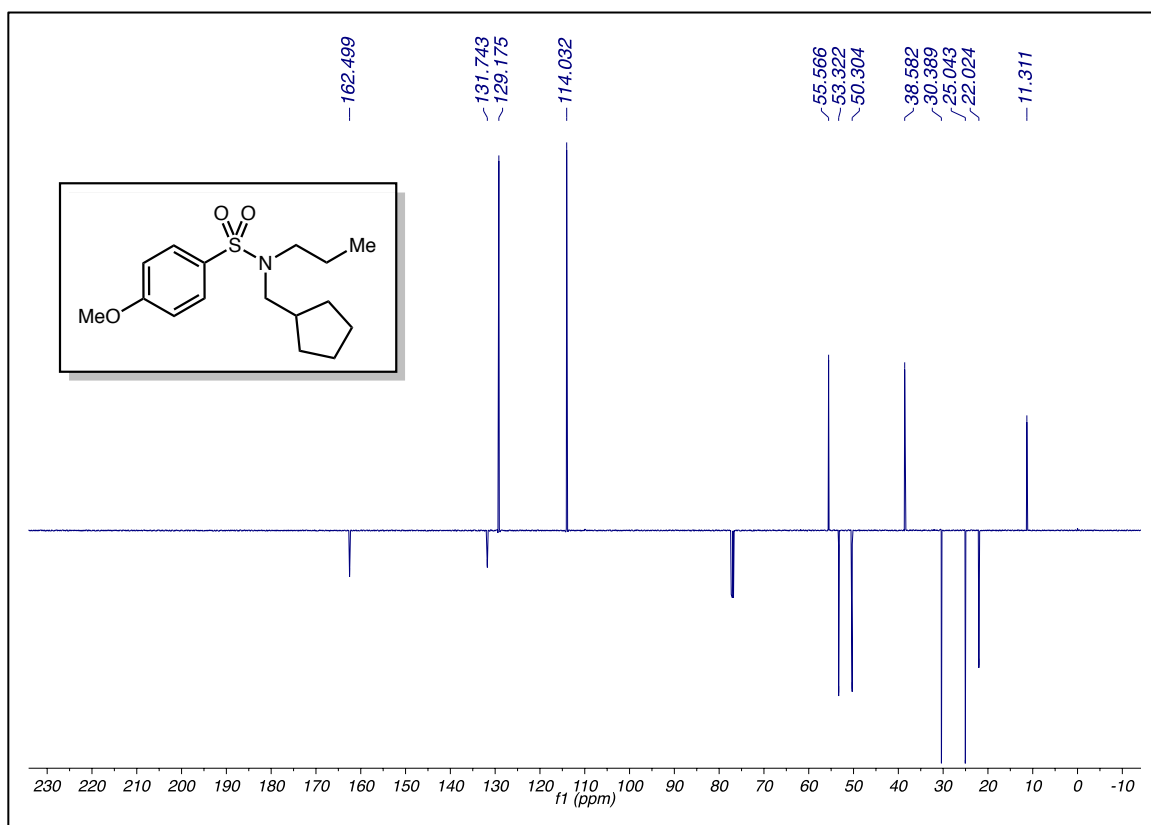

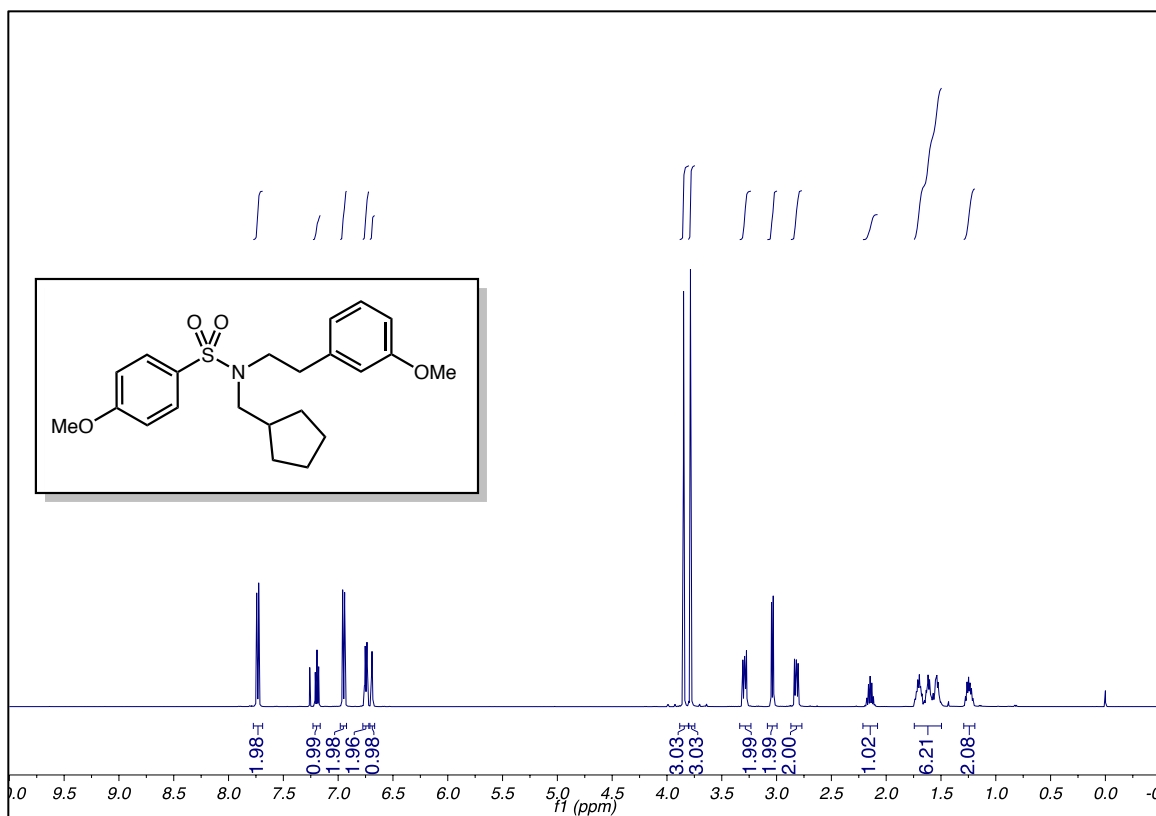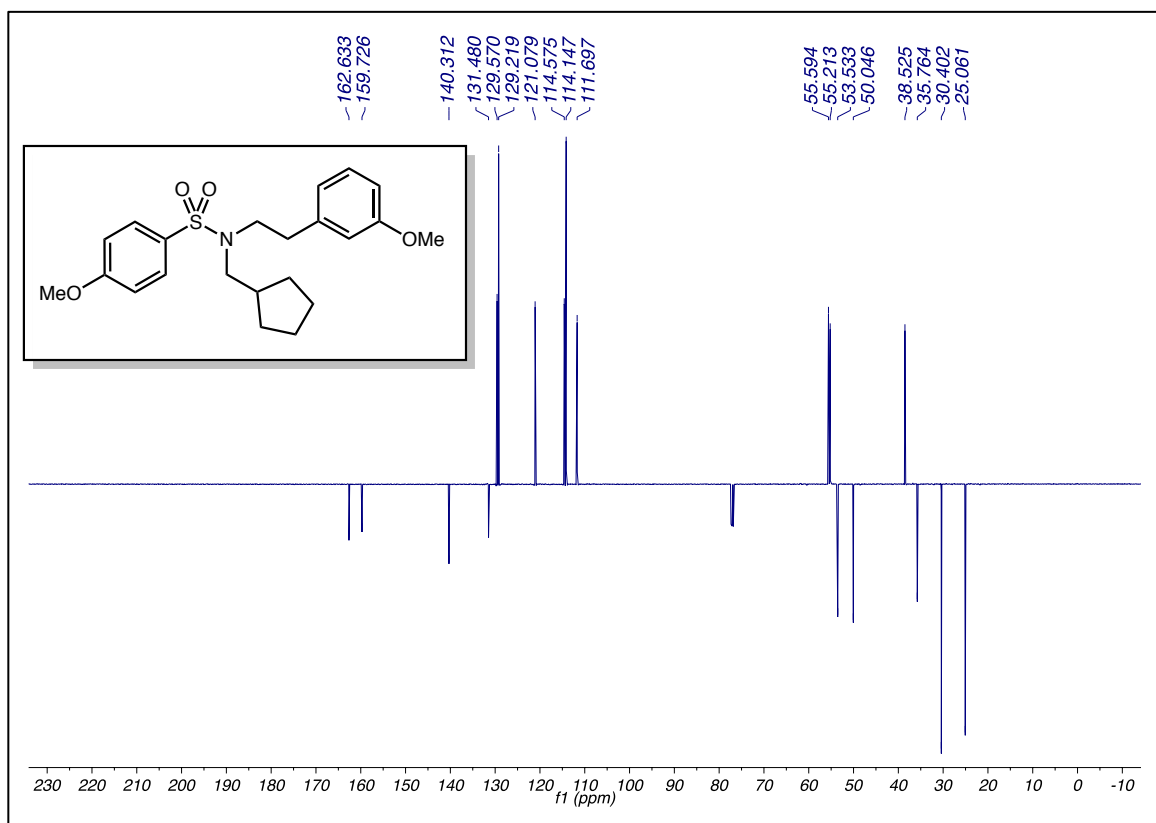

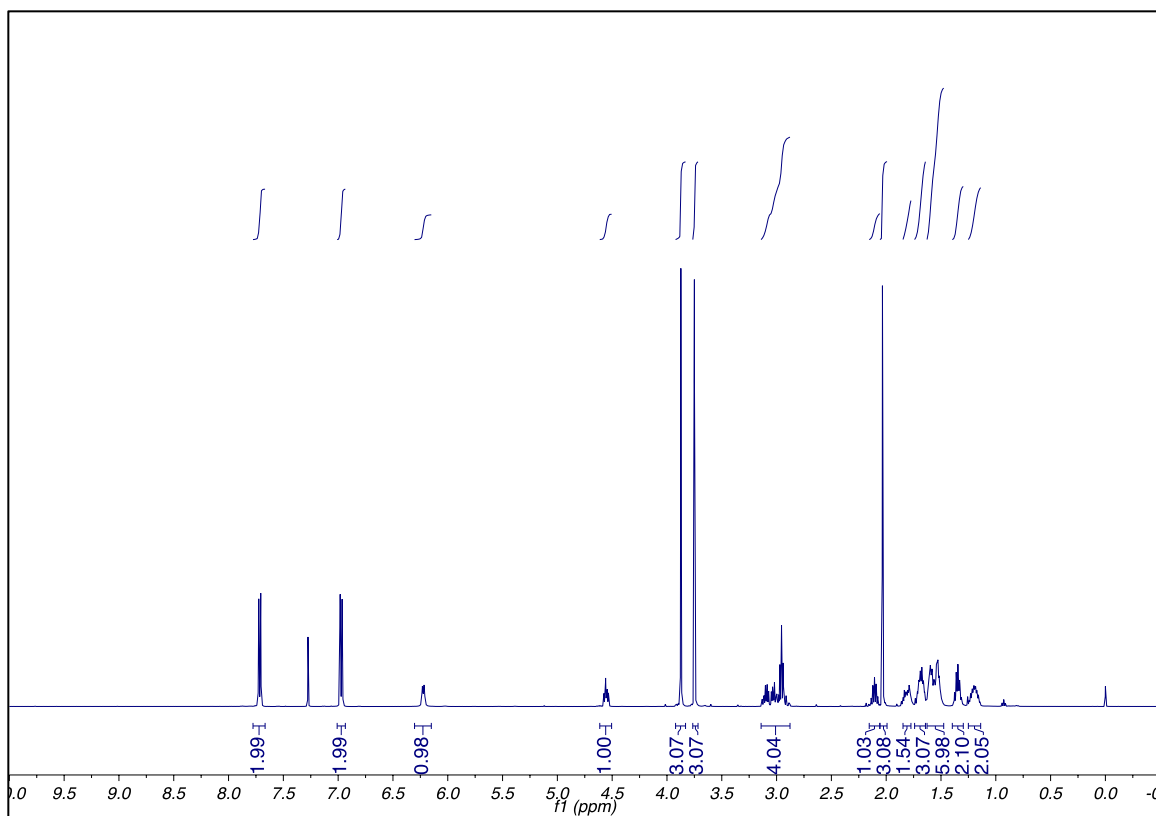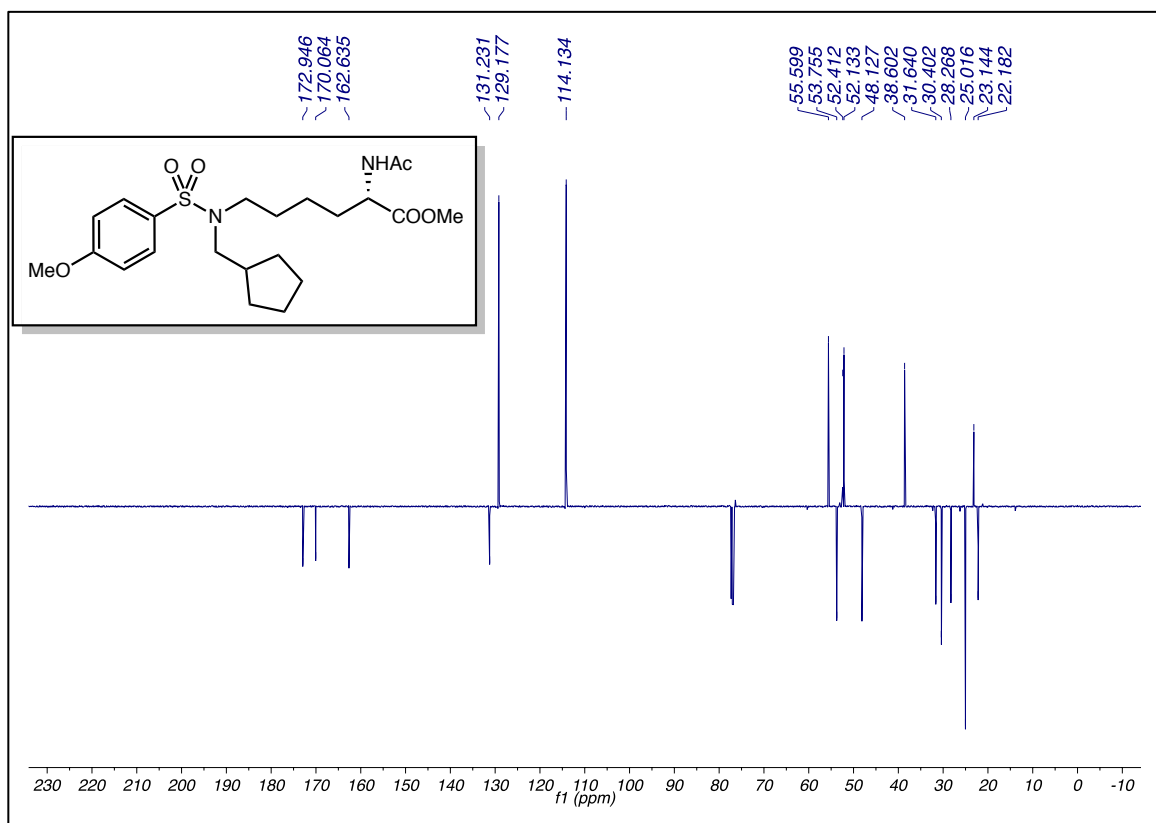

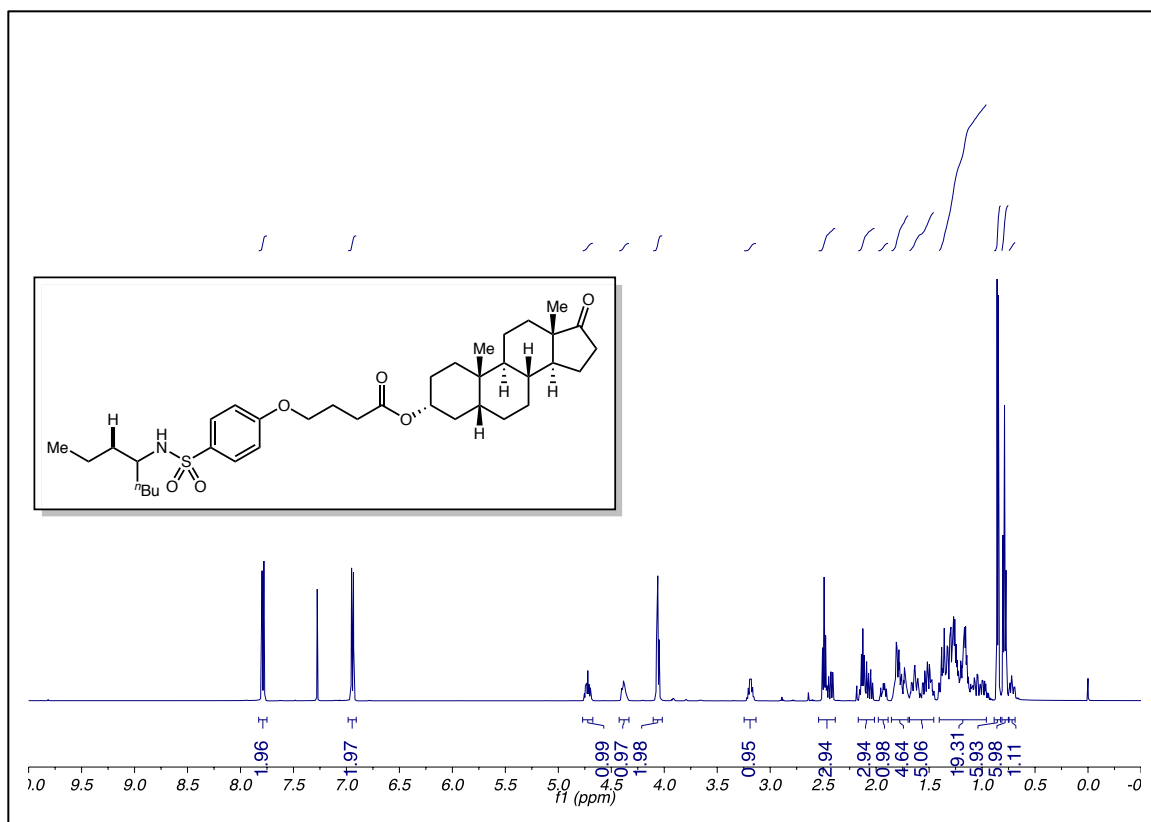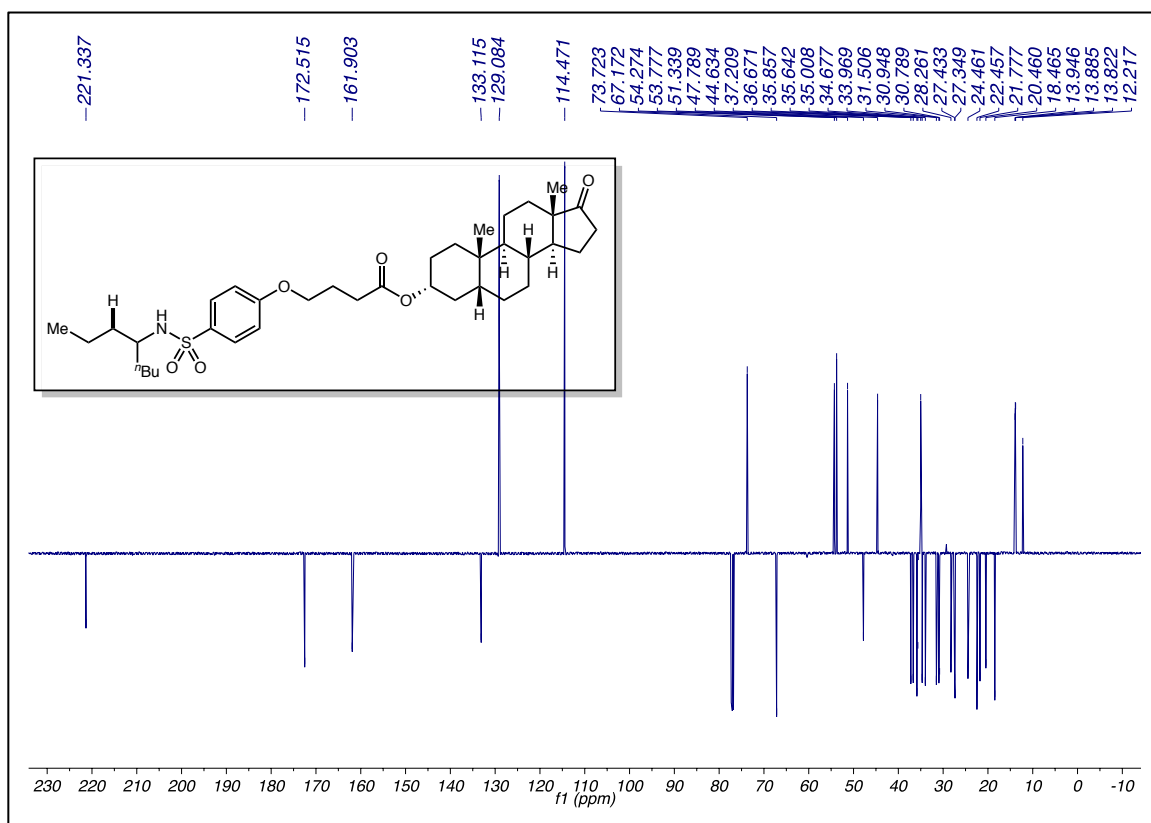

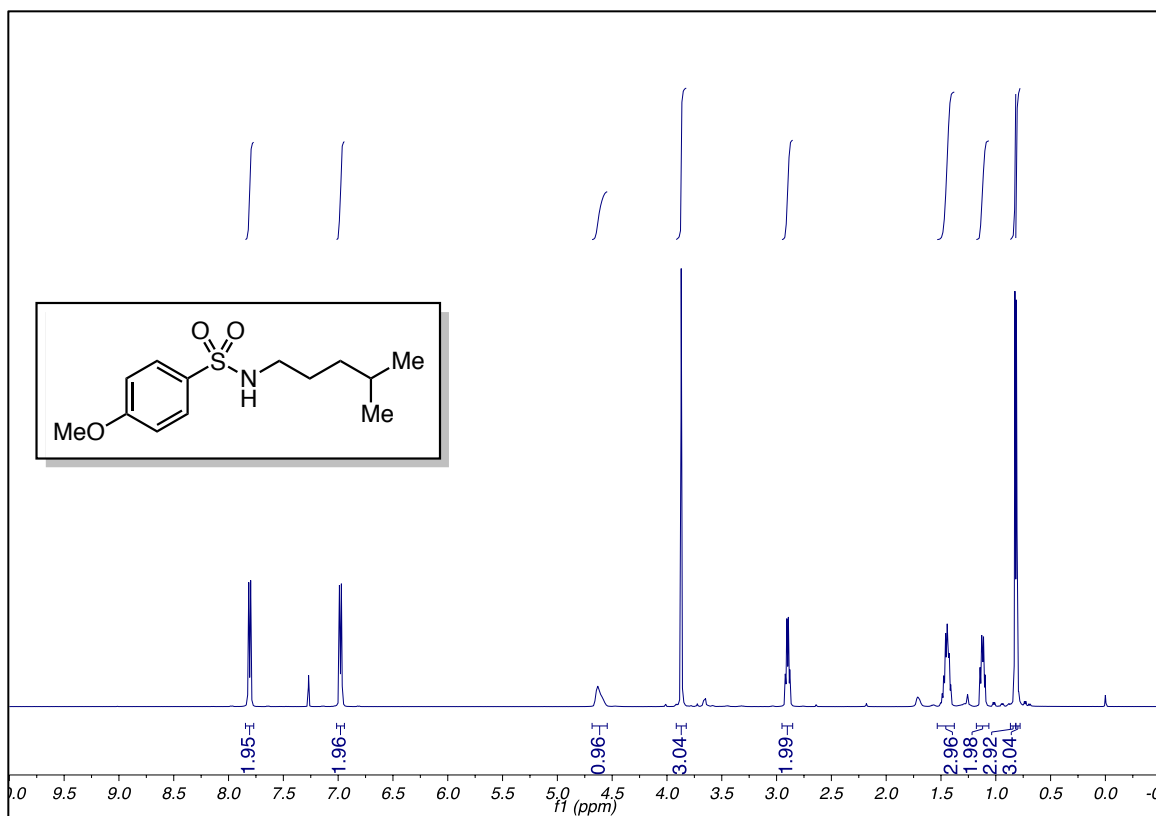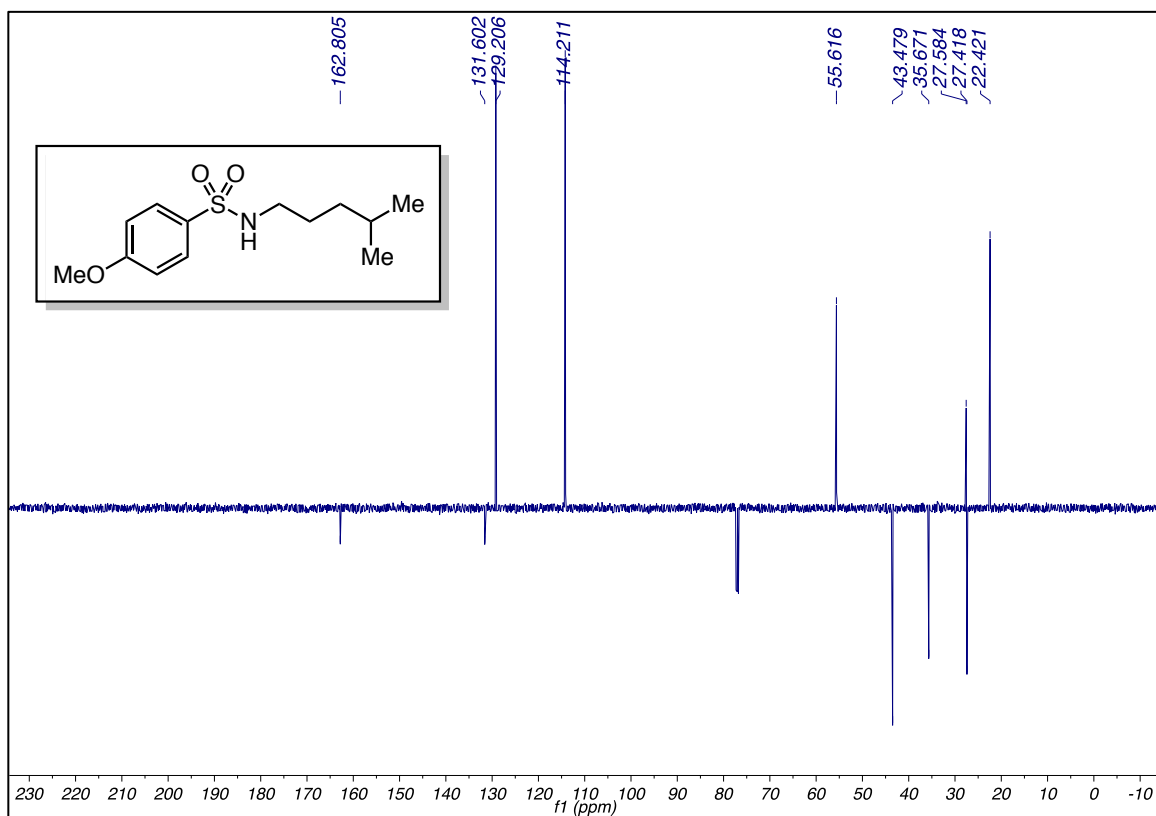

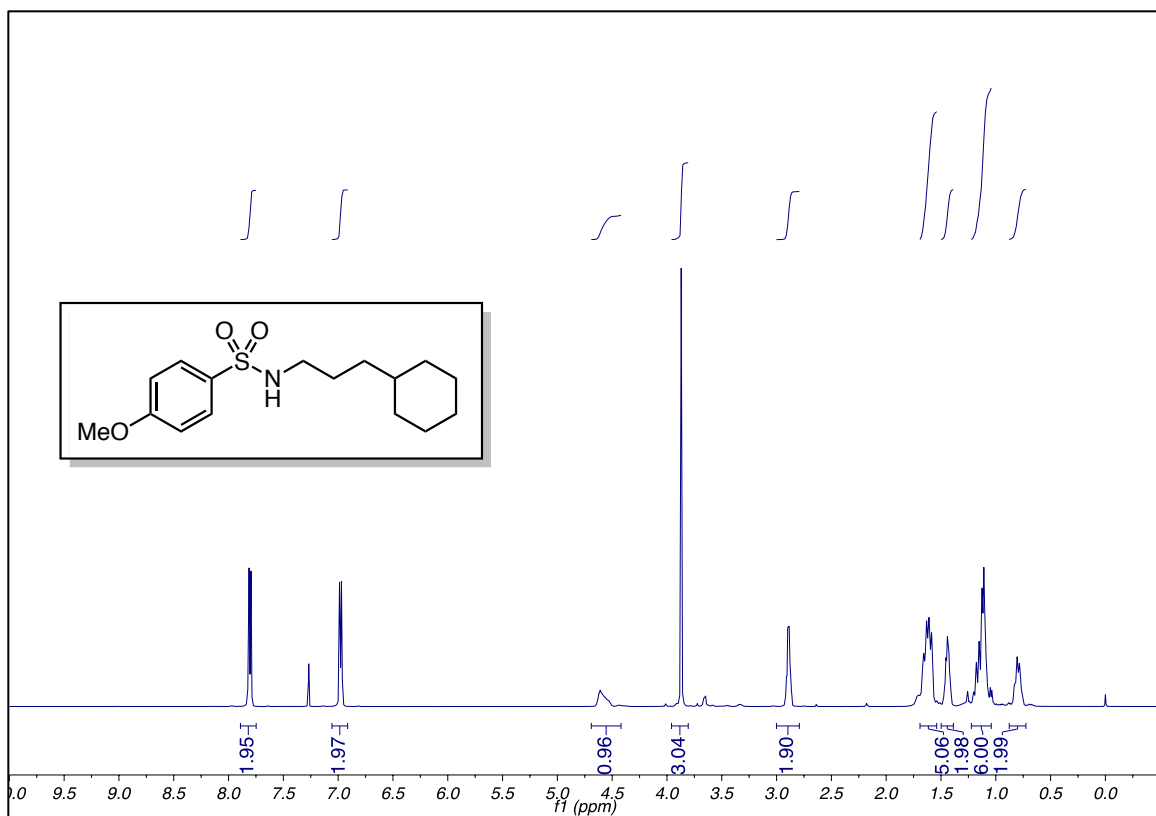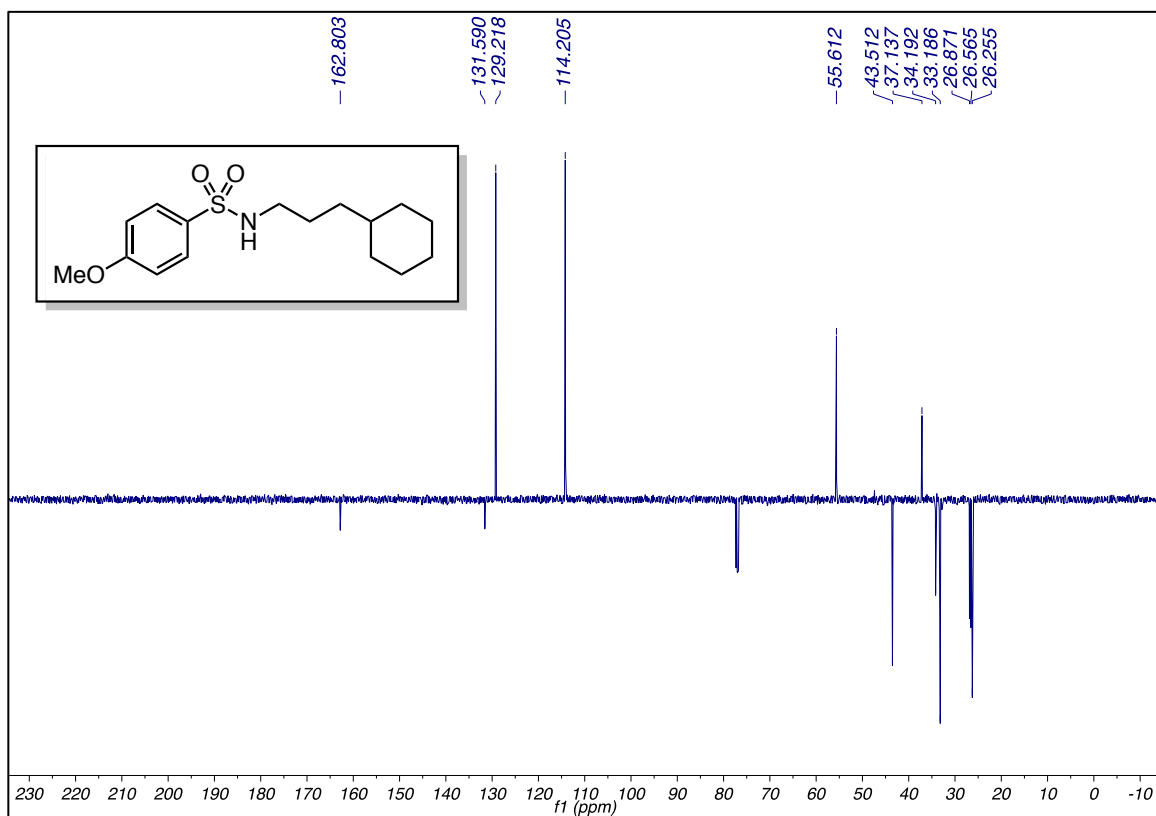

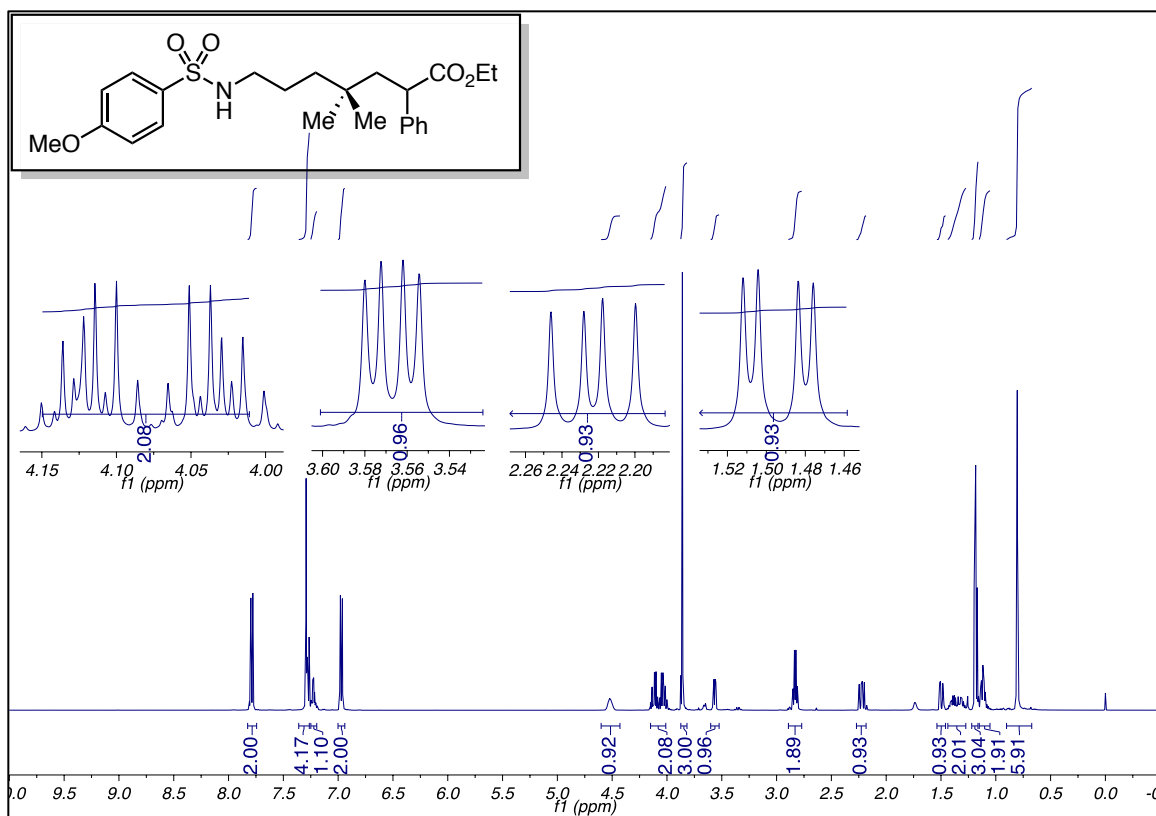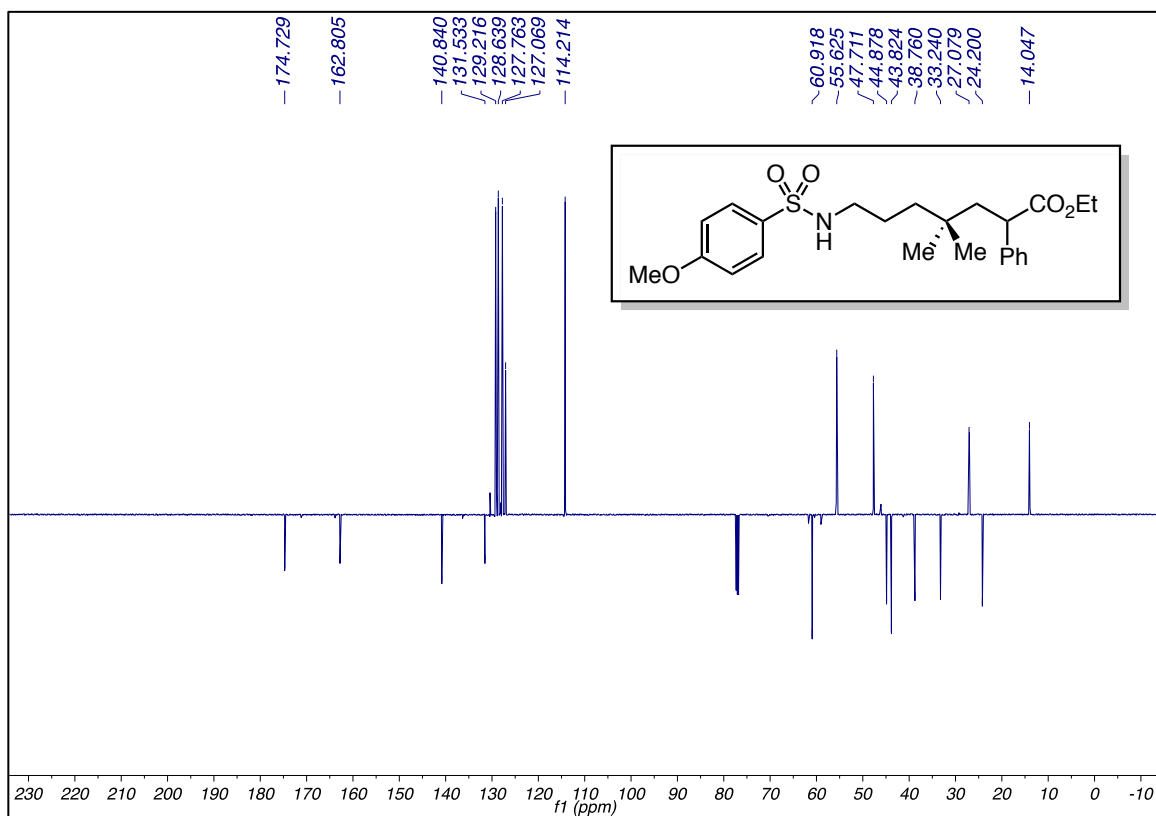

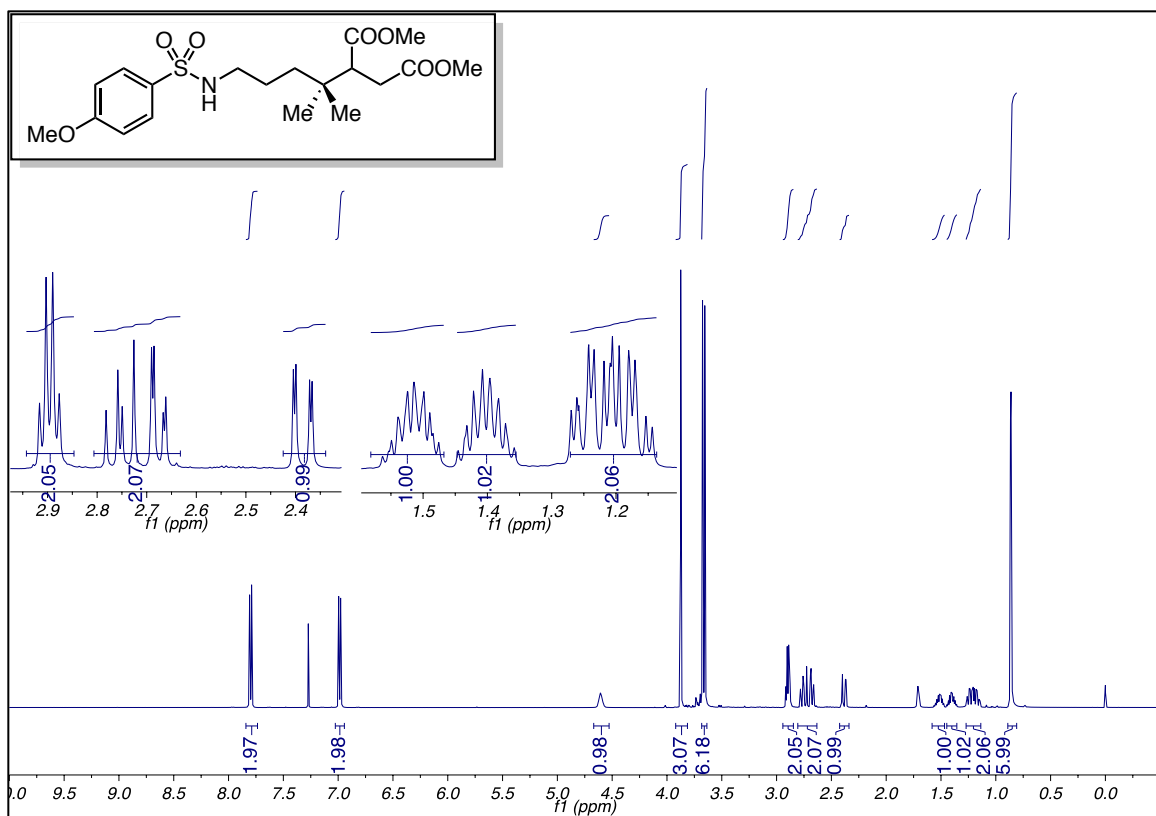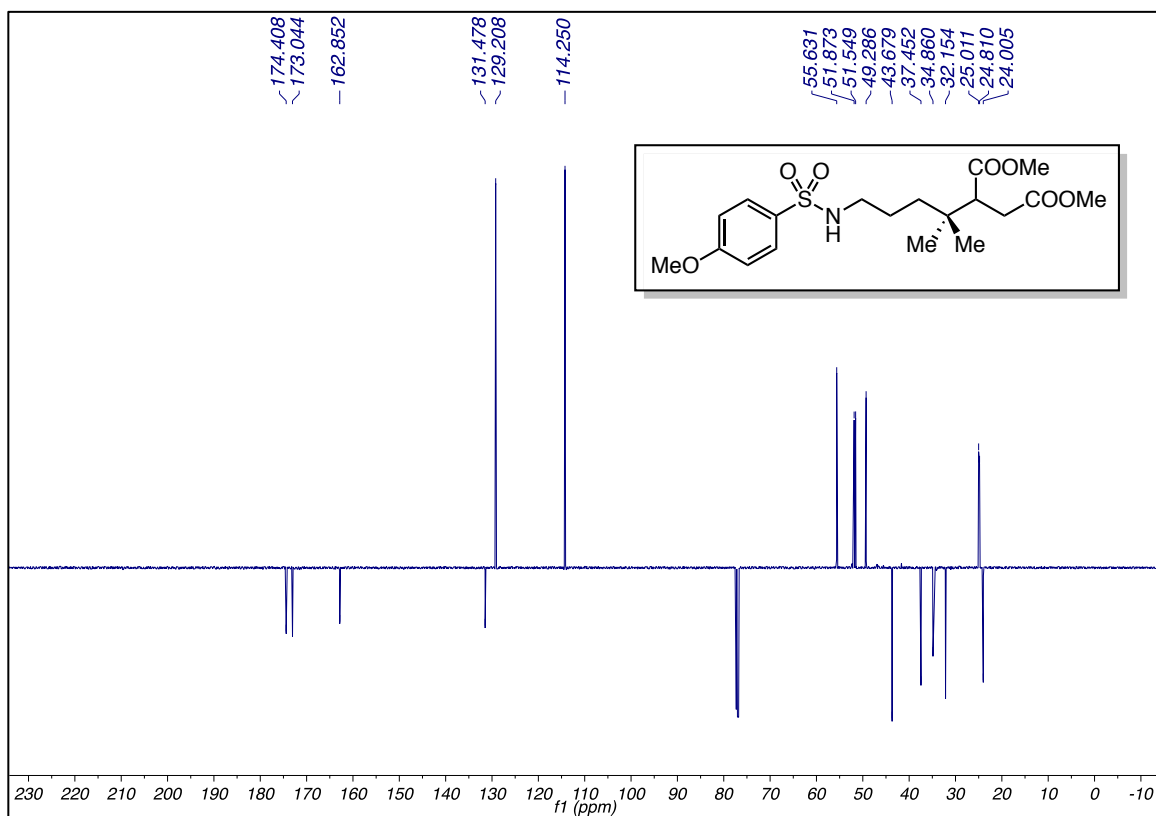



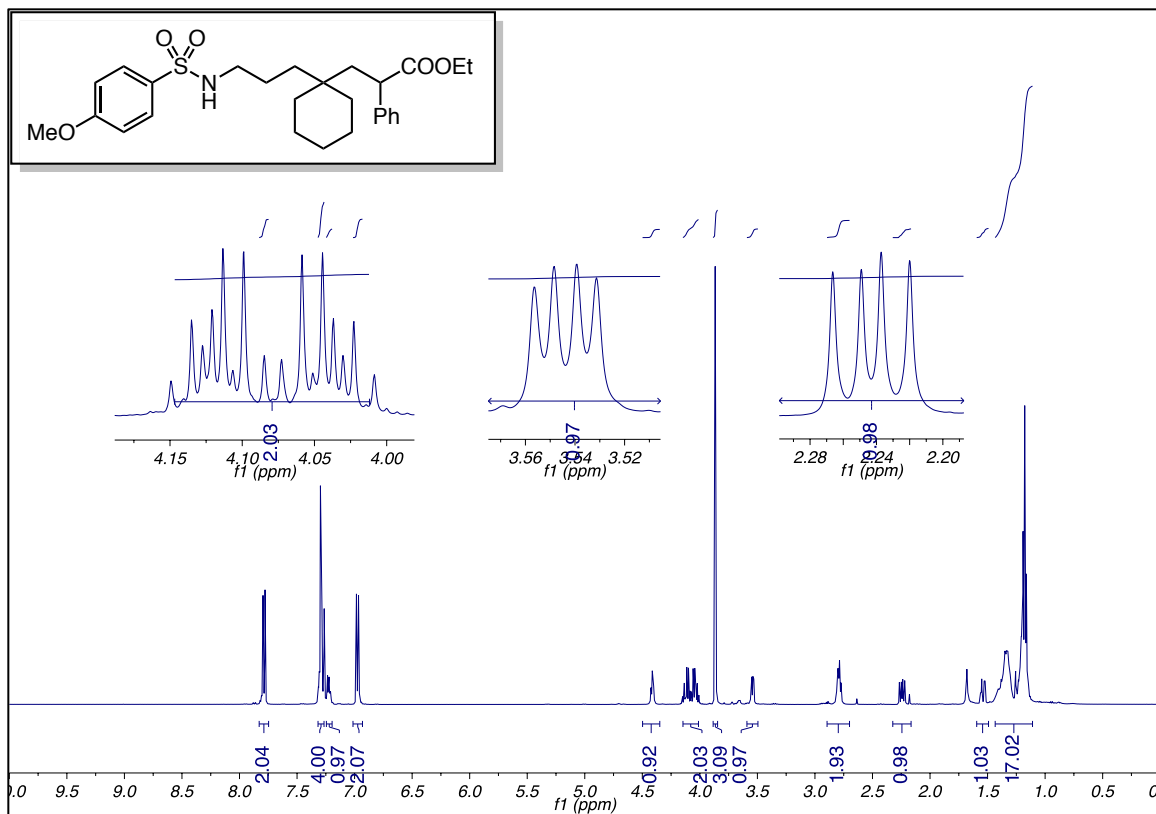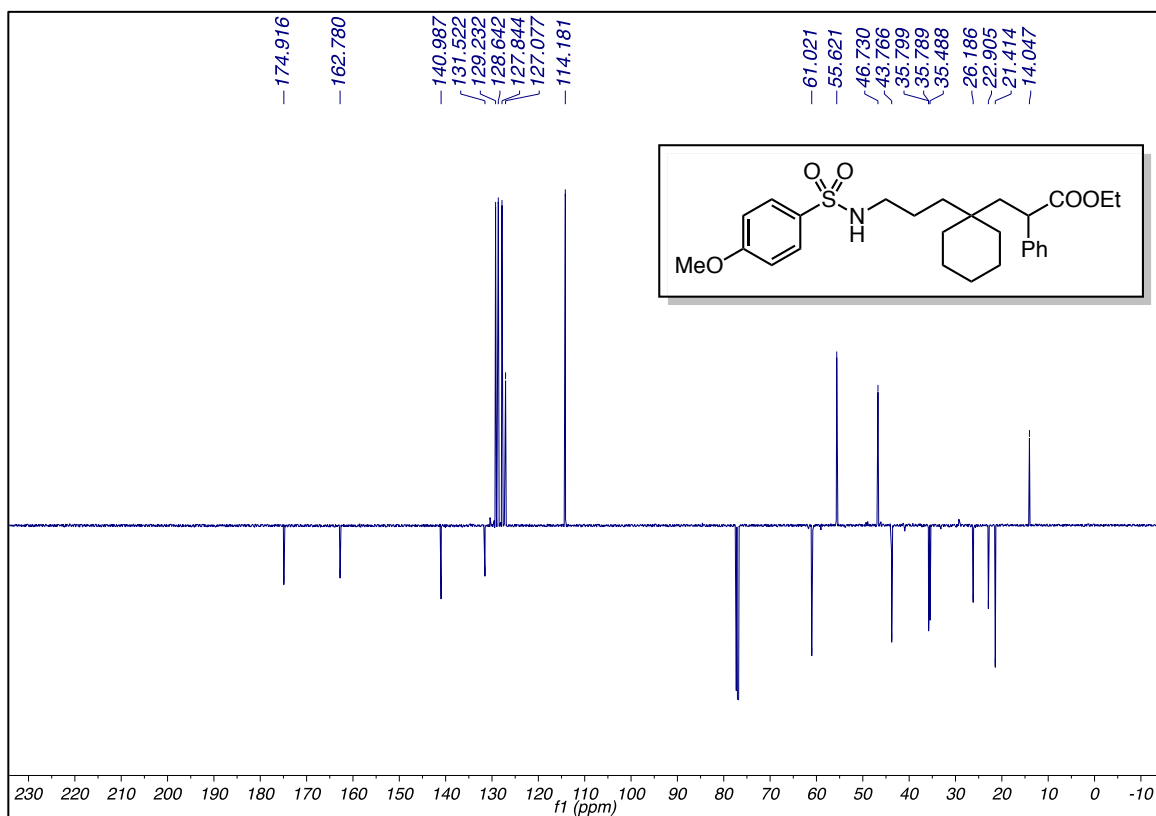

Supplement: NIHMS996287-supplement-SI.pdf [file NIHMS996287-supplement-SI.pdf]
